# Supplementary material for: Systems-level proteomics and metabolomics reveals the diel molecular landscape of diverse kale cultivars
Source: Front Plant Sci. 2023 Jul 28;14:1170448. doi: 10.3389/fpls.2023.1170448 (PMC10421703; doi:10.3389/fpls.2023.1170448)
Supplement: Supplemental Data Sheet 1 — Gas chromatography metabolite data. [file Table_1.xlsx]

## Sheet: Readme
Metabolite Reporting Checklist	Metabolite Reporting Checklist from Fernie et al., 2011
Raw_Infos	Peak Area, RT, Library RI, Compound RI, CAS#. N=4 biological replicates of 3 plants pooled together. For example: 0-K2-1; "0" or "12" = ZT0 (EN) or ZT12 (ED), "K2" = kale (K) cultivar 2-10, "-1 -> -4" = replicate 1-4.
Raw Sub-selected	Raw area from deconvoluted peak for the compounds of interest. N=4 biological replicates. For example: 0-K2-1; "0" or "12" = ZT0 (EN) or ZT12 (ED), "K2" = kale (K) cultivar 2-10, "-1 -> -4" = replicate 1-4.
Normalized	Normalized areas. Areas were normalized to internal standard area (Ribitol, 5TMS derivative) in ng per mg of FW. N=4 biological replicates. For example: 0-K2-1; "0" or "12" = ZT0 (EN) or ZT12 (ED), "K2" = kale (K) cultivar 2-10, "-1 -> -4" = replicate 1-4.
Average	Average of cultivars replicates at EN and EN
Log2FC	Log2 fold change (ED/EN)
Log2FC Summarized	Log2 FC of main metabolites for each time cultivar
										q

## Sheet: Metabolite Reporting Checklist
Metabolite Reporting Checklist:
Level	Aspect	Information	Fill in
general aspect	Type of metabolome analysis	targeted metabolite analysis	FALSE
		non-targeted metabolite class scale profiling	TRUE
		non-targeted metabolome scale profiling	FALSE
		non-targeted finger printing of mass features	FALSE
	Type of quantification	absolute or quantification	Quantification
	Type of reference samples	chemically defined	-
		biologically defined	Frozen grinded 100mg kale leaves
	Type of replication	analytical (same analytical sample preparation)	number
		technological (same biological preparation)	number
		biological (same experimental condition)	4
		full experiment	76
	Type of technology	reference publication	Hill, C. B. & Roessner, U. Metabolic Profiling of Plants by GC–MS. Handb. Plant Metabolomics 1–23 (2013) doi:10.1002/9783527669882.CH1.
	Sample preparation	method of sample preparation	Derivariation with methoxyamine hydrochloride and then with N,O-bis(trimethylsilyl)trifluoroacetamide (BSTFA)
		method of chromatography/separation	Samples (1 μL) was injected in splitless mode. A DB-5MS capillary column (30 m × 0.25 mm × 0.25 µm; Agilent J&W Scientific, Folsom, CA, USA) was used. Injector temperature was 280 °C . Carrier gas flow rate was 1mL min−1. Temperature program was held at 70 °C for 2 min, then increased to 300 °C (rate 5°C min−1), where it remained for 11 min, .
		method of ionization	Positive EI 70eV. Transfer line and ion source temperatures were adjusted to 300oC and 230oC
		method of detection	Detection type (inert XL MSD with Triple-Axis Detector), m/ z 33–600 was recorded
metabolite/mass feature	Metabolite	metabolite name	NIST, GOLM, Pubchem, KEGG
		metabolite sum formula	CnHnOn, n=number
		metabolite structure and public source of metabolite identifier	NIST, GOLM, Pubchem, KEGG
	Identification	identification process	specify procedure (manually supervized|automated)
		by authentic mass isotopomer added to one or all biological sample(s)	FALSE
		by authentic reference compound within a co-processed reference mixture	FALSE
		by authentic reference compound previously mapped to the analytical system	TRUE
		reference library	NIST20, GOLM
		type of mass spectrum	m/ z 33–600
		by match of molecular mass (single mass fragment)	-
		by match of fragments	-
		by match of fragmentation pattern	-
		by match of mass spectrum to reference library	TRUE, Match Factor >70
		type of retention index	time elution
		by match of retention time (index) to reference library	TRUE
	Quantification	type of quantification	Relative abundance
	Validity testing	Recovery testing (chemical analog)	-
		Recovery testing (internally added mass isotopomer)	Ribitol (L-(-)-Arabitol, 5TMS derivative)
		Recovery testing (mixture of most divergent samples from the experiment)	-
		Test for linear range	-
		Limit of quantification (LOQ)	specify concentration of metabolite within sample
		Limit of detection (LOD)	specify concentration of metabolite within sample

## Sheet: Raw-infos
					0-K2-1		0-K2-2		0-K2-3		0-K2-4		0-K3-1		0-K3-2		0-K3-3		0-K3-4		0-K4-1		0-K4-2		0-K4-3		0-K4-4		0-K5-1		0-K5-2		0-K5-3		0-K5-4		0-K6-1		0-K6-2		0-K6-3		0-K6-4		0-K7-1		0-K7-2-2		0-K7-3
Name	Match Factor	CAS#	Library RI	RT	Area	RI	Area	RI	Area	RI	Area	RI	Area	RI	Area	RI	Area	RI	Area	RI	Area	RI	Area	RI	Area	RI	Area	RI	Area	RI	Area	RI	Area	RI	Area	RI	Area	RI	Area	RI	Area	RI	Area	RI	Area	RI	Area	RI	Area
Methoxyamine, 2TMS derivative	63.2	7266-76-4	662	5.603	533924	983	570258	983	564528	983	556992	982	469106	982	569584	982	473001	982	503993	982	560574	983	427637	982	353172	982	528934	982	455813	982	410349	982	335239	982	402892	982	480289	982	517330	982	502617	982	495671	982	392803	982	359900	982	24107
Thiazole, 2-bromo-	61.3	3034-53-5	1029	5.623	32542	984	35371	984	33952	983	35777	983	37998	983	35164	983	39062	983	35996	983	39083	984	35713	982	43298	982	36020	983	48171	983	39290	983	37406	982	42844	983	38161	983	34809	983	35474	983	37407	983	33927	983	31114	982	30209
Silanamine, N,N'-methanetetraylbis[1,1,1-trimethyl-	75.1	1000-70-0	964	5.669	1904148	985	183144	985	173062	985	168790	985	193734	985	258059	985	188161	985	184081	985	201890	986	213308	984	228301	984	189685	985	240942	985	191250	984	196581	984	212652	984	182440	984	174850	985	178019	985	181379	985	223208	985	192936	984	180754
2,4-Diethyl-5-methylthiazole	55	52414-89-8	1210	5.885	35346	995	33846	994	48371	994	46092	994	43421	994	39923	994	41857	994	39299	994	37113	995	52156	993	54335	993	53915	994	31103	994	38215	994	33317	993	22555	994	51810	993	53190	994	50551	994	51547	994	46718	994	48454	994	45350
(4-Phenyl-2-butenyl)trimethylsilane	59.5	1000427-32-5	1308	5.909	59586	995	51968	994	49410	994	80576	994	87002	995	56197	994	73376	995	43521	994	79838	995	56475	994	97546	994	105996	994	60295	994	78427	994	81219	994	78264	994	41258	994	79090	994	78438	994	57526	994	686270	1003	82056	994	694431
Trisiloxane, octamethyl-	54.7	107-51-7	698	6.075	44032	1002	45989	1002	60770	1002	38219	1001	53270	1002	57178	1002	48301	1002	57713	1001	43319	1002	40768	1001	44934	1001	58695	1001	50837	1002	49933	1002	54426	1002	41874	1002	42856	1001	64913	1001	44902	1001	43508	1001	63400	1002	37078	1002	48240
Ethanolamine, 2TMS derivative	60.9	17165-52-5	1021	6.084	566321	1002	532539	1002	685652	1002	537302	1002	798175	1002	762057	1002	611046	1002	768261	1002	613543	1002	656056	1001	746093	1001	872604	1001	585358	1002	518120	1002	572344	1002	509174	1002	616472	1001	620798	1002	539014	1002	465785	1002	686270	1003	557540	1002	694376
Pyridine, 2,3,5-trimethyl-	73.1	695-98-7	1076	6.245	71075	1009	77445	1009	75935	1009	77271	1008	84432	1009	80342	1009	79225	1009	79911	1008	82140	1009	79065	1008	81663	1008	83466	1008	84658	1009	84453	1009	82118	1009	84759	1009	85384	1008	83876	1008	85984	1008	85764	1008	81285	1009	74472	1009	76364
Morpholine, TMS derivative	57.7	13368-42-8	930	6.288	10411	1040	12762	1040	12060	1040	11798	1039	14595	1040	13989	1040	14756	1040	15519	1039	13959	1040	13605	1039	13591	1039	14629	1040	13643	1040	12485	1040	12872	1040	12286	1040	14971	1039	15758	1039	13710	1040	14360	1039	16072	1040	14757	1040	16804
4-Methylurazole	59.8	16312-79-1	1039	6.374	2316	1014	2637	1014	3278	1014	2613	1014	4345	1014	4529	1014	5609	1014	1465	1015	3798	1015	3358	1014	915	1015	4382	1014	6911	1014	5346	1014	4422	1014	6080	1014	3542	1013	4319	1014	2867	1014	4978	1014	3842	1015	2318	1014	3980
(2,3-Dimethylbutan-2-yloxy)trimethylsilane	61.5	40528-90-3	753	6.417	64237	1016	73721	1016	56773	1016	60889	1015	58727	1016	70365	1016	74011	1016	75538	1015	71633	1016	67918	1015	66406	1015	63897	1016	79159	1016	72394	1016	57143	1016	79000	1016	74868	1015	79253	1016	66963	1015	77281	1016	56769	1017	59815	1016	63765
Cyclotetrasiloxane, octamethyl-	79.6	556-67-2	994	6.531	19623	1021	28092	1021	19751	1021	26447	1020	26313	1021	31011	1021	31095	1021	28335	1020	32085	1021	30435	1020	26772	1021	28966	1021	33199	1021	29349	1021	30516	1021	31484	1021	32178	1020	34313	1021	34451	1020	34675	1021	35833	1021	32161	1021	35447
6,6,7-Trimethyl-octane-2,5-dione	60	1000187-31-5	1238	6.867	11965	1035	12139	1035	12146	1035	13582	1035	19493	1035	14512	1035	18075	1036	15865	1035	12985	1036	14705	1035	18805	1035	16042	1035	14637	1035	17295	1035	19825	1035	24172	1035	16470	1035	16218	1035	15370	1035	15800	1035	11892	1036	13766	1036	13436
Carbonic acid, monoamide, N-benzyl-N-(2-heptyl)-, hexyl ester	58.6	1000451-85-8	2338	6.975	33225	1040	41578	1040	38957	1039	39536	1039	46364	1040	45521	1040	45146	1040	48237	1039	44703	1040	44395	1039	45198	1039	44898	1039	44744	1040	41052	1040	41862	1040	41171	1040	49461	1039	50151	1039	47132	1039	44390	1040	51676	1040	46694	1040	52736
Tris(trimethylsilyl)carbamate	65.6	1000366-58-2	962	6.976	248151	1040	307548	1040	253362	1040	289292	1039	341005	1040	302717	1040	315752	1040	349423	1039	314825	1040	316557	1039	317875	1039	324126	1039	327047	1040	297247	1040	303819	1040	306662	1040	340724	1039	351755	1039	355041	1039	320279	1040	347334	1040	356931	1040	367117
3-Pyridinol, TMS derivative	67.6	41571-88-4	1134	7.154	375959	1047	450516	1047	425513	1047	438512	1047	419227	1047	500955	1047	498022	1048	463166	1047	509574	1048	524585	1047	562328	1047	534627	1047	603271	1047	546586	1047	569538	1047	568527	1047	546796	1047	576130	1047	531820	1047	534473	1047	566566	1048	514770	1047	607124
4-Methyl-2,4-bis(p-hydroxyphenyl)pent-1-ene, 2TMS derivative	70.1	1000283-56-8	2442	7.16	69388	1047	81586	1047	72922	1047	77398	1047	92919	1048	86130	1048	99880	1048	81580	1047	96430	1048	78282	1047	74656	1047	78935	1047	87496	1048	81603	1048	90443	1048	82256	1048	78779	1047	79391	1047	77680	1047	77316	1047	101396	1048	87464	1048	82063
1,3-Phenylenedibenzoate	50.6	34343	2587	7.309	16237	1054	28329	1054	22570	1054	25582	1054	26841	1054	27451	1054	28821	1054	26700	1054	34204	1054	28774	1054	27403	1054	26435	1054	35128	1054	32726	1054	33049	1054	31499	1054	32883	1054	35802	1054	32990	1054	35643	1054	41867	1055	31753	1054	36481
3-(4-Fluorobenzoyl)-2(3H)-thioxo-4-thiazolyl 4-fluorobenzoate	70.9	1000222-56-2	2833	7.32	5837	1055	6921	1054	6675	1055	6848	1054	7179	1054	6651	1055	7066	1055	7013	1054	6996	1055	6576	1054	6787	1054	7657	1054	8094	1055	7301	1055	7297	1055	7667	1055	7642	1054	7070	1055	7367	1054	6732	1054	8047	1055	6751	1055	7016
l-Norvaline, N-(2-methoxyethoxycarbonyl)-, propyl ester	63.5	1000328-63-5	1759	7.419	62381	1065	73655	1065	66728	1065	69218	1065	76919	1065	75007	1065	70117	1065	75724	1065	74550	1065	70516	1065	69713	1065	74013	1065	76815	1065	72847	1065	74206	1065	71873	1065	76285	1065	72069	1065	78755	1065	78043	1065	84049	1066	71036	1065	77822
Methyltris(trimethylsiloxy)silane	77.9	17928-28-8	1010	7.583	161893	1066	239452	1065	206571	1065	195463	1065	216993	1066	255771	1066	234318	1066	233196	1065	189008	1066	186978	1065	190840	1065	191162	1065	239732	1066	233770	1066	203350	1066	230795	1066	170491	1065	207815	1065	199617	1065	187943	1065	219086	1066	225341	1066	216279
Lactic Acid, 2TMS derivative	76.2	17596-96-2	1066	7.674	65674	1069	30991	1069	136253	1069	30995	1069	16536	1069	78851	1069	24088	1070	29316	1069	22558	1070	21557	1069	58999	1069	306554	1069	147940	1069	126079	1069	91029	1069	25334	1069	87197	1069	339464	1069	50041	1069	79777	1069	233455	1070	13131	1070	45993
N,O-Bis(trimethylsilyl)carbamate	65.2	35342-88-2	1140	7.758	38500	1073	28776	1069	167843	1069	32252	1069	278773	1086	74072	1069	19423	1070	27842	1069	20206	1070	20239	1069	49280	1069	19933	1072	135700	1069	111411	1069	80903	1069	22690	1069	79058	1069	308236	1069	46255	1069	71227	1069	23320	1073	370386	1087	42232
Glycolic acid, 2TMS derivative	82.6	33581-77-0	1081	8.071	173419	1086	179879	1086	184932	1086	177150	1086	278773	1086	401069	1086	337601	1086	313731	1086	339773	1086	342498	1086	383103	1086	394895	1086	431686	1086	369709	1086	415210	1086	405813	1086	391528	1086	373358	1086	338897	1086	378615	1086	364384	1087	370400	1087	375948
4-Nonene, 3-methyl-, (Z)-	83.6	63830-69-3	959	8.192	31963	1091	34379	1091	34435	1091	35602	1091	45549	1091	45611	1091	46200	1091	47526	1091	38973	1091	43595	1091	49102	1091	51649	1091	50001	1091	48682	1091	44086	1091	48132	1091	41918	1091	45792	1091	43250	1091	43473	1091	42601	1092	38157	1091	37887
Cyclopentane, 1,1,3,4-tetramethyl-, cis-	81.4	53907-60-1	818	8.292	19308	1096	20283	1095	20851	1095	20617	1095	26286	1096	25977	1096	24699	1096	29642	1095	22304	1096	26106	1095	28044	1095	30287	1095	27759	1095	25802	1096	27317	1096	30191	1096	22505	1095	24982	1095	21540	1095	24488	1096	20301	1096	23961	1096	18498
2-Propenoic acid, 2-[(trimethylsilyl)oxy]-, trimethylsilyl ester	63.1	55191-13-4	1099	8.339	18750	1098	13032	1097	20708	1097	20898	1097	16676	1098	401121	1086	337601	1086	313731	1086	339614	1086	342498	1086	383663	1086	394895	1086	431671	1086	369677	1086	415128	1086	409656	1086	391528	1086	373405	1086	338897	1086	378733	1086	364384	1087	370449	1087	375756
Dodecane, 5-methyl-	88	17453-93-9	1255	8.593	25542	1108	27327	1108	25980	1108	30765	1108	36084	1108	39149	1108	40990	1109	35496	1108	32376	1109	33675	1108	39742	1108	40070	1108	39621	1108	40293	1108	37558	1108	37805	1108	37474	1108	38614	1108	35899	1108	37257	1108	35872	1109	33176	1109	35408
2-Ethylhexanol, TMS derivative	67	18023-53-5	1036	8.798	9628	1117	12313	1117	11359	1117	11477	1117	14849	1117	15752	1117	16079	1117	14623	1117	13118	1117	13974	1117	13965	1117	14155	1117	16921	1117	16599	1117	14666	1117	16031	1117	14475	1117	15660	1117	14674	1117	15405	1117	15596	1117	12776	1117	13693
3-Ethyl-3-methylheptane	89.3	17302-01-1	953	8.904	65299	1121	71494	1121	65285	1121	76998	1121	85706	1121	92891	1121	96170	1121	78583	1121	71640	1121	75718	1121	95076	1121	88669	1121	89237	1121	96496	1121	89482	1121	97895	1121	86618	1121	101452	1121	91307	1121	80656	1121	80038	1121	73087	1121	76002
Urea, methyl-	55	598-50-5	828	9.099	23142	1128	16125	1128	24186	1128	25226	1128	29720	1128	33263	1128	24090	1128	32218	1128	27492	1128	20023	1128	35828	1128	30999	1128	31529	1128	30971	1128	35729	1128	34375	1128	33244	1128	35141	1128	24926	1128	29634	1128	31571	1128	28159	1128	31365
dl-c-Allylglycine	65.7	7685-44-1	1044	9.103	240073	1128	237273	1128	234451	1128	240489	1128	245316	1129	275175	1129	247116	1129	258960	1128	273817	1129	231192	1128	308071	1128	312815	1128	301397	1128	324990	1128	344127	1128	345501	1129	289428	1128	290729	1128	313916	1128	317973	1128	310566	1129	297543	1129	296476
2,3-Dimethoxy-5-aminocinnamonitrile	55.3	1000214-46-5	1936	9.426	20991	1151	25759	1150	2024	1140	22065	1150	3891	1140	3214	1140	2927	1141	3438	1140	2403	1141	1674	1141	3364	1140	3154	1140	3533	1141	49643	1150	48576	1150	2822	1141	1237	1140	1518	1140	23274	1150	28568	1151	2883	1141	2569	1141	3654
Ethane, 1,1,2-trimethoxy-	59.3	24332-20-5	682	9.689	25236	1150	29365	1150	23820	1150	26701	1150	21021	1151	21853	1150	28718	1151	21648	1150	26262	1150	23373	1150	26220	1150	24327	1150	62455	1151	61189	1150	59432	1151	66828	1151	24778	1150	25688	1150	27704	1150	33795	1150	22418	1151	20951	1151	19502
1-(Trimethylsilyl)-3-[(trimethylsilyl)oxy]urea	65.5	1000453-67-2	1265	9.691	291847	1151	335875	1150	273990	1150	296274	1150	238417	1150	248380	1150	315949	1151	231709	1150	298216	1151	257587	1150	303098	1150	285600	1150	750564	1151	725827	1150	712199	1151	792817	1151	285880	1150	292182	1150	318103	1150	400739	1150	257886	1151	229415	1151	218727
Silanol, trimethyl-, carbonate (2:1)	66.1	39981-89-0	993	9.874	33061	1157	40728	1157	36639	1157	37713	1157	40338	1158	46401	1158	40094	1158	45600	1157	33978	1158	39790	1157	38624	1157	39146	1157	47332	1158	40991	1157	41617	1157	39590	1158	40297	1157	41430	1157	40957	1157	39249	1157	46546	1158	35695	1158	45439
Pentasiloxane, dodecamethyl-	76	141-63-9	1189	10.46	11601	1180	11701	1180	14256	1180	12179	1179	18903	1180	13907	1180	24539	1180	14815	1180	22629	1180	21956	1180	25382	1180	25625	1180	25124	1180	21594	1180	26074	1179	22048	1180	20782	1179	18596	1180	15771	1179	18917	1179	23969	1180	19296	1180	23182
Phosphoric acid, bis(trimethylsilyl)monomethyl ester	77.7	18291-81-1	1186	10.621	14136	1186	14122	1185	11181	1185	26498	1185	27945	1186	21373	1185	60933	1186	17863	1185	45950	1185	48715	1185	57949	1186	40583	1186	77432	1186	43636	1186	60226	1186	60464	1186	30056	1185	21242	1185	16881	1185	36820	1185	14859	1186	17898	1186	24979
Ethanimidic acid, N-(trimethylsilyl)-, trimethylsilyl ester	61.6	10416-59-8	905	11.193	26922	1207	23389	1207	15818	1207	47007	1207	73932	1207	29328	1207	115767	1207	50302	1207	68500	1207	121788	1207	145500	1207	62769	1207	254865	1207	139447	1207	111080	1207	224375	1207	95927	1207	40400	1207	28036	1207	102034	1207	58639	1207	46521	1207	46179
4-tert-Amylphenol, TMS derivative	52.8	1000373-05-7	1457	11.279	6929	1210	9094	1211	8112	1210	7943	1211	8228	1211	8146	1210	8688	1211	8975	1210	9058	1211	8635	1210	7919	1210	7600	1211	8840	1211	7600	1211	7780	1211	6925	1211	8971	1211	8754	1210	8260	1210	8907	1211	8154	1211	8540	1211	8271
Valine, 2TMS derivative	79.7	15984-93-7	1172	11.665	6491	1225	9509	1225	12179	1225	13971	1225	23885	1225	10990	1225	19085	1225	18942	1225	38826	1225	24487	1225	24716	1225	16453	1225	38284	1225	33622	1225	29902	1225	36419	1225	16792	1225	12763	1225	13162	1225	17067	1225	13687	1225	9624	1225	17378
3-(Trifluoromethyl)-5H,6H,7H,8H-[1,2,4]triazolo[4,3-a]pyrimidine	63.2	1000410-51-4	1231	12.39	73137	1252	81578	1252	76119	1252	77011	1252	85776	1252	83182	1252	79054	1252	82179	1252	85831	1252	77675	1252	75427	1252	78439	1252	82918	1252	77556	1252	78233	1252	76913	1252	81257	1252	82849	1252	83184	1252	82730	1252	87013	1252	77045	1252	80631
Benzoic Acid, TMS derivative	78.7	65357	1249	12.492	9982	1255	8092	1255	9339	1256	8036	1255	9712	1255	9112	1256	8216	1256	9275	1255	7953	1256	7419	1256	7783	1255	7850	1256	8645	1255	7910	1255	8748	1255	8820	1255	7008	1255	6203	1255	6859	1255	5934	1256	7857	1255	8965	1256	7616
Decane, 1-iodo-	87.7	2050-77-3	1433	12.579	64538	1259	65001	1259	64192	1259	62597	1259	79406	1259	70643	1259	79417	1259	71623	1259	65604	1259	67444	1259	84215	1259	80016	1259	82751	1259	89162	1259	82631	1259	95326	1259	83012	1259	81905	1259	76905	1259	70625	1259	74061	1259	67537	1259	68602
Propanethioic acid, 2-methyl-, S-ethyl ester	66.7	2432-50-0	940	12.764	22277	1265	23565	1266	24496	1265	21456	1265	25399	1265	26477	1265	33098	1265	25402	1265	26638	1265	21143	1265	26417	1265	29348	1265	27595	1265	29936	1265	27259	1265	30017	1265	29324	1265	27966	1265	27853	1265	27396	1265	24442	1265	27398	1265	26912
Undecane, 4,7-dimethyl-	82.3	17301-32-5	1185	13.004	9123	1275	11741	1275	14250	1275	16739	1275	24756	1275	17501	1275	22737	1275	23146	1275	16200	1275	18797	1275	25679	1275	19792	1275	46455	1275	31345	1275	36340	1275	41272	1275	19864	1275	17520	1275	13512	1275	17266	1275	21388	1275	16095	1275	24761
Ethanolamine, 3TMS derivative	80.1	5630-81-9	1262	13.014	109300	1275	145904	1275	175834	1275	200642	1275	307259	1275	204159	1275	284364	1275	283164	1275	207143	1275	233731	1275	295537	1275	229308	1275	589658	1275	371686	1275	430982	1275	497032	1275	242617	1275	222447	1275	169231	1275	222111	1275	275499	1275	205558	1275	321134
Silanol, trimethyl-, phosphate (3:1)	81.4	10497-05-9	1286	13.141	94836	1280	87105	1280	95953	1280	122157	1279	164026	1280	115385	1280	243107	1280	90482	1280	78011	1280	82930	1279	150967	1280	63951	1280	1724664	1280	650389	1280	751554	1280	984854	1280	137501	1280	92314	1280	90386	1279	122804	1280	102742	1280	102311	1280	157338
Glycerol, 3TMS derivative	86.4	1785220	1289	13.275	206912	1285	233018	1285	285981	1285	298087	1285	405360	1285	310288	1285	401176	1285	366709	1285	389904	1285	445439	1285	576599	1285	495629	1285	864005	1285	539892	1285	622542	1285	690006	1285	407034	1285	383017	1285	314053	1285	373045	1285	410173	1285	322848	1285	446574
Niacin, TBDMS derivative	55.8	1000352-59-6	1546	13.684	802	1300	83	1300	212	1301	1478	1300	2195	1300	116	1301	2481	1300	2302	1300	403	1301	5452	1300	7752	1300	5572	1300	9259	1300	6400	1300	5755	1300	6238	1300	3198	1300	2761	1300	1808	1300	3457	1300	1532	1300	84	1302	2006
L-Isoleucine, 2TMS derivative	59.3	7483-92-3	1301	13.729	3100	1302	3966	1302	4748	1301	5436	1302	9619	1302	5022	1301	7909	1302	8365	1301	20928	1302	12993	1301	13044	1302	8918	1302	13933	1301	10815	1301	10483	1302	13028	1302	9255	1302	7039	1302	7609	1302	9041	1302	7592	1302	5744	1302	11083
Undecane, 6,6-dimethyl-	83.9	17312-76-4	1229	13.782	32201	1303	37853	1304	33099	1304	38054	1304	39512	1304	38465	1304	40617	1304	38874	1304	29158	1304	38882	1304	51549	1304	42221	1304	46998	1304	46183	1304	45080	1304	44543	1304	43608	1303	37360	1303	39382	1304	38471	1304	40270	1304	39116	1304	36590
L-Proline, 2TMS derivative	69.1	7364-47-8	1305	13.797	10616	1304	13238	1304	18318	1304	19580	1304	34149	1304	17821	1304	30821	1304	31293	1304	34395	1304	27364	1304	31986	1304	25737	1304	80575	1304	87503	1304	66112	1304	84093	1304	32646	1304	19508	1304	16320	1304	20499	1304	22614	1305	16320	1304	28258
2-Butenedioic acid, (Z)-, 2TMS derivative	67.9	23508-82-9	1312	13.992	17145	1311	29792	1311	27137	1311	28319	1311	142351	1313	18466	1311	30781	1311	28950	1311	33823	1313	20918	1311	39582	1311	34040	1311	92403	1311	86651	1311	88147	1311	84086	1311	32368	1311	39822	1311	36584	1311	29707	1311	14916	1311	27379	1312	19191
Glycine, 3TMS derivative	76.2	5630-82-0	1314	14.034	13323	1313	18130	1313	27303	1313	23762	1313	508528	1313	20837	1313	21062	1313	29664	1313	126392	1313	40911	1313	26960	1313	27863	1313	30580	1313	66955	1313	16583	1313	35352	1313	17315	1313	19562	1313	28716	1313	17926	1313	29393	1313	13849	1313	33633
Undecane, 4,4-dimethyl-	83.6	17312-68-4	1229	14.17	23772	1318	15841	1318	26613	1318	27895	1318	23247	1318	16080	1318	29141	1318	28351	1318	23648	1318	13871	1318	32032	1318	24395	1318	17770	1318	28624	1318	37069	1312	30361	1318	49014	1318	16459	1318	17963	1318	31193	1318	23864	1318	22910	1318	17388
4-Octene, 2,3,6-trimethyl-	82	63830-65-9	930	14.229	34680	1321	36883	1320	35481	1321	34562	1320	40235	1320	42414	1321	34394	1320	46281	1320	33474	1321	33675	1320	39901	1320	40594	1320	46267	1320	42010	1321	38258	1320	35837	1320	30939	1320	35384	1321	40630	1321	34444	1320	47973	1321	38042	1321	30708
Butanedioic acid, 2TMS derivative	83.6	40309-57-7	1321	14.306	86724	1323	101382	1323	83852	1323	91550	1323	149766	1323	142168	1323	218185	1323	130051	1323	167219	1323	120100	1324	224009	1323	132640	1323	521702	1324	317975	1323	432247	1323	481737	1323	198457	1323	223563	1323	127929	1323	195655	1323	233320	1323	150274	1324	170270
Glyceric acid, 3TMS derivative	88.7	38191-87-6	1344	14.724	9571	1345	7484	1345	52793	1339	30504	1340	78061	1339	6718	1339	12971	1340	42361	1340	14102	1346	77939	1340	16427	1340	63662	1339	24314	1339	17090	1340	25008	1339	19651	1340	14312	1340	12112	1339	15580	1340	11108	1339	13243	1339	15037	1340	135226
Nonane, 1-iodo-	89.8	4282-42-2	1342	14.801	50911	1343	57238	1343	51937	1342	54403	1342	61066	1343	63856	1342	62819	1343	60353	1342	47967	1342	53077	1342	60028	1343	61593	1343	60359	1342	62468	1343	59664	1343	64889	1343	59245	1342	62734	1343	60606	1342	59579	1342	60805	1342	51183	1343	52693
2-Butenedioic acid, (E)-, 2TMS derivative	66.6	17962-03-7	1353	15.277	8880	1361	7822	1361	9754	1361	11055	1361	9381	1361	5872	1361	15589	1361	8587	1361	5457	1361	10745	1361	9341	1361	7080	1361	71596	1361	42868	1361	56919	1361	56006	1361	9194	1361	8608	1361	5791	1361	7623	1361	9349	1361	8945	1361	10027
Bisphenol C	50.3	79-97-0	2274	15.445	3230	1345	1981	1345	2707	1344	2505	1345	1844	1344	1256	1345	1606	1345	1322	1344	399	1345	945	1345	619	1344	113	1345	832	1367	104	1367	404	1367	202	1367	896	1344	842	1344	267	1345	491	1345	110	1345	75	1346	275
Serine, 3TMS derivative	81.2	64625-17-8	1368	15.517	18811	1370	23316	1370	34279	1370	36472	1370	73461	1370	29304	1370	49011	1370	51607	1370	201321	1370	74576	1370	76353	1370	46721	1370	167541	1370	153307	1370	128779	1370	178161	1370	44658	1370	32965	1370	30803	1370	52561	1370	31504	1370	28109	1370	34968
Pipecolic acid, N-ethoxycarbonyl-, octyl ester	52.6	1000393-07-5	2193	15.525	5897	1370	3365	1370	446	1371	6523	1371	7441	1370	4288	1370	63143	1370	3698	1370	7220	1370	22131	1370	37330	1370	3658	1370	114101	1370	164008	1370	74069	1370	146376	1370	7021	1370	4637	1370	1427	1370	19825	1370	12369	1370	3310	1370	5479
Erythrono-1,4-lactone, (E)-, 2TMS derivative	78.8	55220-79-6	1317	15.756	5832	1379	10454	1379	4902	1379	12091	1379	14943	1379	12726	1379	20441	1379	13716	1379	22121	1379	19818	1379	26982	1379	21276	1379	45069	1379	21773	1379	34003	1379	32841	1379	18380	1379	16673	1379	9800	1379	12185	1379	20847	1379	15553	1379	22431
L-Threonine, 3TMS derivative	86.9	2058906	1367	16.161	8043	1395	14826	1395	20081	1395	22680	1395	43138	1395	16161	1395	29510	1395	29501	1395	71996	1395	50743	1395	49178	1395	33350	1395	84169	1395	85393	1395	74811	1395	89716	1395	23761	1395	19771	1395	23656	1395	25732	1395	18180	1395	15293	1395	28650
Hexasiloxane, tetradecamethyl-	56.3	107-52-8	1353	16.328	13709	1401	20094	1402	18178	1402	19229	1402	18553	1402	18947	1401	18490	1401	20374	1401	14241	1402	16353	1402	13128	1402	13595	1401	16979	1402	17456	1402	15282	1402	16453	1402	13802	1401	14801	1401	14005	1401	13012	1402	14514	1401	13770	1402	14820
Decane, 6-ethyl-2-methyl-	70.4	62108-21-8	1185	16.98	11664	1427	13284	1427	13018	1427	13967	1427	14305	1427	15758	1427	14761	1427	13989	1427	10670	1427	12905	1427	12445	1427	15767	1427	16941	1427	15213	1427	14505	1427	12639	1427	13758	1427	15156	1427	14006	1427	15065	1427	14889	1427	13051	1427	10611
L-Aspartic acid, 2TMS derivative	77.6	1000333-28-8	1420	17.101	106	1432	551	1432	519	1431	1271	1431	2386	1432	1754	1432	9548	1432	2252	1431	2918	1432	4159	1431	7818	1431	2345	1432	21729	1431	12807	1431	15767	1431	15385	1432	4512	1432	3463	1431	804	1432	2682	1432	10993	1432	4208	1432	15934
2-Methyl-6-oxo-4,5,6,7-tetrahydroimidazo(1,5,4-ef)benzodiazepine-1,5	57	66596-67-6	1805	17.289	871	1439	1481	1440	1694	1439	1933	1439	2277	1439	1498	1439	2232	1439	1884	1439	1647	1439	1908	1439	1874	1440	1957	1439	7520	1439	4331	1439	4875	1439	5931	1439	1112	1439	1348	1439	294	1439	1107	1439	2487	1440	1956	1440	2986
2,2'-Bipyridine	87.4	366-18-7	1472	17.538	80655	1449	101185	1449	85994	1449	96270	1449	73431	1449	103377	1449	102803	1449	82331	1449	93554	1449	115603	1449	122605	1449	107876	1449	124149	1449	115340	1449	118023	1449	110640	1449	125303	1449	120607	1449	118345	1449	126347	1449	117683	1449	114888	1449	145849
Acetyl valeryl	87	35163	989	17.988	25237	1467	38081	1467	28682	1467	31548	1467	35912	1467	31896	1467	31859	1467	28133	1467	26009	1467	26682	1467	37269	1467	36577	1467	31889	1467	35656	1467	30530	1467	33579	1467	30721	1467	29261	1467	27473	1467	30500	1467	30990	1467	25261	1467	25892
Cyclopentene-3-carboxylic acid, 1-(trimethylsilyl)oxy-, methyl ester	54.1	1000151-78-8	1184	18.292	4103	1479	5331	1479	4682	1479	8151	1479	10749	1479	3022	1479	5611	1479	11475	1479	3352	1479	12083	1479	5368	1479	3754	1479	14236	1479	7702	1479	4833	1479	8458	1479	7781	1479	14472	1498	13895	1498	5844	1479	3981	1479	5304	1479	14969
Timonacic, 2TMS derivative	85	71240-84-1	1399	18.358	3801	1482	6521	1482	4260	1482	13312	1482	11688	1481	4060	1482	13352	1482	13111	1482	6462	1482	14566	1482	18442	1481	9649	1481	27546	1482	14289	1482	11072	1481	18007	1482	11992	1481	6718	1481	4385	1482	16096	1482	9938	1481	5498	1482	7917
3-(2,5-Dimethoxyphenyl)furan-2,5-dione	54.3	1000387-40-2	2020	18.536	101687	1498	116155	1498	171184	1498	193522	1498	297302	1498	113505	1497	234933	1498	295862	1498	158611	1497	274776	1498	388406	1498	305743	1498	777579	1498	582192	1498	719917	1498	676792	1498	363566	1497	225427	1497	205927	1497	459246	1498	517753	1498	494363	1498	652139
2-Butanone, 1,1,1-trifluoro-	57.8	381-88-4	389	18.772	224511	1498	246260	1498	237074	1498	243703	1498	258280	1498	240412	1498	252503	1498	244206	1498	197248	1498	225602	1498	269583	1498	263335	1498	269425	1498	253400	1498	262146	1498	279432	1498	243906	1498	253657	1498	243131	1498	244592	1498	230088	1498	218118	1498	213585
3,3',5,5'-Tetramethyl-2,2'-bifuryl	54.7	222187-59-9	1423	18.82	101687	1498	116311	1498	171184	1498	191530	1498	297253	1498	113505	1497	234933	1498	295846	1498	157460	1497	274815	1498	388400	1498	305773	1498	777579	1498	582192	1498	719915	1498	676965	1498	363566	1497	225427	1497	205927	1497	459246	1498	517791	1498	494363	1498	651911
Malic acid, 3TMS derivative	83.7	38166-11-9	1497	18.822	101687	1498	116311	1498	171184	1498	191530	1498	297253	1498	113505	1497	234933	1498	295846	1498	157460	1497	274815	1498	388020	1498	305773	1498	777579	1498	582192	1498	719915	1498	676965	1498	363566	1497	225427	1497	205927	1497	459246	1498	517791	1498	494363	1498	651911
2-Amino-2-methyl-1,3-propanediol	68.8	115-69-5	1063	18.829	2457	1498	1328	1497	2011	1498	3730	1498	4055	1498	2471	1498	32442	1498	11503	1498	7449	1498	29026	1498	59047	1498	3959	1498	167923	1498	6960	1498	30363	1498	32850	1498	6366	1498	3747	1498	20411	1497	85627	1498	71508	1498	4249	1499	99333
L-5-Oxoproline, , 2TMS derivative	82.5	30274-77-2	1522	19.438	237655	1524	271156	1524	335098	1524	368395	1524	619960	1524	375360	1524	637762	1524	460807	1524	561791	1524	536409	1524	584565	1524	427584	1524	1691857	1525	1090266	1524	1270647	1524	1328012	1525	565401	1524	437271	1524	341070	1524	442101	1524	463181	1524	435020	1524	594864
Trichloromethane	54.1	67-66-3	615	19.452	11462	1526	13514	1526	14727	1526	15213	1526	9414	1526	19657	1526	20230	1526	13775	1526	14385	1526	14914	1526	19786	1526	15176	1526	28229	1525	21723	1525	24704	1525	25715	1525	18944	1526	17665	1526	14333	1526	13002	1525	14231	1526	16354	1526	20252
2-Isopropyl-5-methyl-1-heptanol	68.4	91337-07-4	1165	19.455	2203	1524	2759	1524	3643	1524	12249	1524	22665	1524	804	1525	25080	1524	842	1525	22329	1524	8297	1524	23629	1524	13734	1524	7204	1525	47184	1525	35767	1525	56494	1524	21785	1524	15635	1524	3577	1524	1793	1525	11726	1524	14537	1524	24164
L-Aspartic acid, 3TMS derivative	83.6	55268-53-6	1522	19.533	127243	1529	175008	1529	115099	1529	184693	1529	230000	1529	186991	1529	418375	1529	221181	1529	333490	1529	278224	1529	494341	1529	222159	1529	1192603	1529	910763	1529	938772	1529	1068236	1529	394221	1529	291596	1529	183350	1529	348703	1529	213543	1529	236174	1529	175981
4-Allyl-1,6-heptadiene-4-ol	59.7	10202-75-2	1077	19.69	8923	1536	9793	1536	9611	1536	9657	1536	9718	1536	9223	1536	10119	1536	10856	1536	9070	1536	8545	1536	9817	1536	11170	1536	9450	1535	10537	1536	9729	1536	11007	1536	5720	1536	13577	1536	8206	1536	7241	1536	9508	1535	10095	1536	5589
L-Leucine, N-(3-methylbutyl)-, methyl ester	50.7	1000452-94-4	1334	19.731	38587	1538	45510	1538	42894	1538	41035	1538	35191	1537	51434	1538	48787	1538	42639	1538	39605	1538	50561	1538	59582	1538	53290	1538	1691857	1525	1090266	1524	1270658	1524	1328012	1525	53487	1538	53657	1538	55519	1538	55992	1538	54170	1538	50041	1538	65503
Quinolinium, 1-ethyl-, iodide	55.4	634-35-5		19.83	19081	1542	23799	1542	23253	1541	41035	1538	35193	1537	51434	1538	48787	1538	42635	1538	39605	1538	49993	1538	59590	1538	26759	1542	1691857	1525	1090298	1524	1270622	1524	1328012	1525	53487	1538	53657	1538	27671	1541	32665	1542	54170	1538	50041	1538	65503
Cyanic acid, (1-methylethylidene)di-4,1-phenylene ester	53.9	1156-51-0	2450	19.899	32305	1545	36917	1545	34032	1545	35344	1545	35862	1545	36407	1545	33047	1545	32928	1545	30206	1545	31471	1545	28755	1545	30255	1545	33029	1545	27581	1544	26788	1545	31232	1545	30957	1545	32533	1545	33252	1545	32091	1545	30494	1544	29702	1545	29209
Heptacosane	83.1	593-49-7	2700	20.117	22187	1554	29174	1554	26153	1554	25657	1554	25711	1554	26060	1554	30086	1554	25722	1554	20274	1554	23756	1554	26134	1554	27986	1554	25648	1554	29839	1554	29179	1554	31779	1554	31900	1554	27602	1554	28427	1554	26675	1554	29332	1554	21780	1554	25415
L-Cysteine, 3TMS derivative	83.7	7364-50-3	1568	20.306	5047	1562	7247	1562	4131	1562	12796	1562	10333	1562	4065	1562	11718	1562	10760	1562	6552	1562	12416	1562	14549	1562	7323	1562	28676	1562	13937	1562	10715	1562	19255	1562	9448	1562	5356	1562	3784	1562	14173	1562	5764	1562	4041	1562	4818
2,3,4-Trihydroxybutyric acid tetrakis(trimethylsilyl) deriv., (, (R*,R*)-)	81.8	38191-88-7	1518	20.497	17817	1570	23498	1570	27344	1570	31366	1570	42956	1570	30612	1570	80815	1570	39559	1570	64215	1570	73163	1570	110850	1570	88684	1570	254318	1570	136871	1570	200860	1570	191305	1570	50673	1570	48798	1570	18806	1570	35910	1570	50458	1570	37998	1570	58318
Sulfurous acid, 2-ethylhexyl hexyl ester	68.7	1000309-20-2	1972	20.606	26836	1574	25309	1574	13214	1576	11009	1576	25141	1574	27046	1564	24673	1574	22514	1574	19335	1574	21702	1574	9552	1579	27976	1574	29071	1564	28541	1564	25882	1564	24210	1574	12943	1576	26405	1574	24914	1574	10098	1574	26854	1564	22970	1574	8155
2,2-Dimethylpropanoic anhydride	82.1	1538-75-6	1150	20.64	26836	1574	25309	1574	13214	1576	11009	1576	25141	1574	15910	1585	24634	1574	22594	1574	19335	1574	21702	1574	9552	1579	27976	1574	19708	1585	15853	1585	16893	1585	27304	1574	12943	1576	26405	1574	24889	1574	9557	1574	17184	1585	22970	1574	8155
Silane, diethylbutoxy(2-methylbutoxy)-	54.2	1000363-09-8	1329	21.18	1966	1599	2450	1599	3464	1599	2881	1599	9664	1599	7726	1599	7795	1599	9548	1599	6418	1599	9882	1599	10252	1599	10075	1599	8350	1598	4868	1598	6029	1599	5890	1599	9089	1599	9356	1598	6442	1599	5275	1599	12192	1598	8869	1599	12631
Hexadecane	84.8	544-76-3	1600	21.448	141289	1610	121151	1610	81880	1610	78766	1610	177326	1610	249964	1610	96848	1610	122773	1610	125479	1610	69444	1610	237227	1610	98245	1610	124423	1610	251786	1610	227987	1610	208063	1610	100435	1610	87247	1610	166114	1610	102907	1610	164115	1610	87161	1610	76047
Silane, dimethylpentyloxytridecyloxy-	50.8	1000346-83-1	2062	21.727	603	1622	878	1622	447	1622	855	1622	705	1622	896	1622	880	1622	969	1622	882	1622	868	1622	841	1622	719	1622	906	1622	791	1622	871	1622	851	1622	778	1622	935	1621	952	1621	940	1622	830	1622	260	1622	489
N,O,O'-Tris-(trimethylsilyl)-6-hydroxy-2-aminohexanoic acid	76.8	66434-54-6	1620	21.87	15751	1628	18886	1629	23528	1628	26198	1628	48280	1628	26666	1628	46948	1628	36802	1628	33551	1628	39514	1628	38189	1628	29656	1628	113913	1628	72068	1628	84520	1628	90356	1628	38319	1628	28919	1628	22840	1628	33007	1628	28644	1628	28248	1629	36225
Benzylphenethylamine, N-ethoxycarbonyl-	66	1000343-97-4	2180	21.894	1398	1630	1442	1630	3126	1629	3522	1630	6406	1629	3116	1629	2486	1629	4872	1629	6751	1629	5707	1629	4785	1629	5746	1630	7061	1629	7769	1629	5635	1629	6387	1629	1744	1629	1450	1629	3455	1629	2486	1629	3659	1629	3505	1629	9184
Borane, diethyl(decyloxy)-	66.3	1000152-34-3		22.047	10313	1636	10762	1636	9763	1636	9904	1636	9335	1636	8769	1636	10946	1636	10591	1636	10843	1636	12042	1636	10252	1636	9290	1636	11770	1636	14270	1636	12327	1636	9583	1636	9199	1636	9716	1636	8908	1636	10673	1636	8766	1636	8223	1636	7772
l-Norvaline, N-(2-methoxyethoxycarbonyl)-, dodecyl ester	61.4	1000328-64-4	2654	22.106	15032	1639	15804	1639	15983	1639	16332	1639	14313	1639	16801	1639	14637	1639	15333	1639	16505	1639	16805	1639	16427	1639	16295	1639	17790	1639	16265	1639	17674	1639	16831	1639	16575	1639	16797	1639	16759	1639	17394	1639	16770	1639	14853	1639	17977
Asparagine, 3TMS derivative	56.2	55649-62-2	1745	22.944	194	1675	162	1665	189	1686	242	1675	252	1686	145	1673	388	1675	403	1675	1334	1675	4878	1675	2037	1675	230	1685	5281	1675	2244	1675	824	1675	1088	1675	170	1675	169	1676	420	1665	354	1685	438	1685	5013	1705	8236
Diethanolamine, 3TMS derivative	55.4	20836-41-3	1244	23.075	3905	1681	14495	1682	3470	1682	16143	1681	15480	1681	6583	1684	13457	1681	28232	1681	7089	1681	19083	1681	24046	1681	7500	1681	46213	1681	17337	1681	21258	1681	38825	1681	13432	1681	9853	1681	36096	1686	29392	1681	9708	1681	18115	1686	27811
Butanal, 2,3,4-tris[(trimethylsilyl)oxy]-3-[[(trimethylsilyl)oxy]methyl]-, O-methyloxime, (S)-	70	56196-22-6	1897	23.181	2073	1683	11773	1686	7253	1686	3454	1686	18240	1686	6583	1684	13457	1681	23782	1686	7089	1681	6133	1686	15942	1686	13176	1686	46213	1681	17337	1681	9594	1686	10292	1686	38640	1686	48753	1686	36096	1686	54585	1686	24441	1686	18115	1686	27805
1-Octen-3-ol, methyl ether	56.1	1000352-74-7	946	23.605	19912	1704	40278	1705	40130	1704	39403	1704	40895	1704	35471	1704	43169	1704	37250	1704	34588	1705	38726	1704	8149	1704	27357	1704	30393	1704	32137	1704	37812	1704	34505	1704	36966	1704	29710	1704	26472	1704	39891	1704	44409	1704	37674	1705	30078
N-(4-Bromo-phenyl)-4-ethyl-benzamide	56.7	300670-74-0	2509	23.628	3272	1705	2714	1706	5125	1705	5293	1705	17169	1705	11949	1706	13791	1705	12556	1706	12799	1705	14124	1705	17350	1705	17518	1705	15270	1705	11215	1705	13892	1705	14639	1705	18757	1705	17902	1705	14576	1705	13512	1705	26999	1705	21492	1705	30312
Inosose, 2-desoxy-, O-methyloxime, tetrakis-O-(trimethylsilyl)-	53.8	1000149-50-8	2071	24.036	268924	1732	317108	1732	345598	1732	395785	1732	55686	1724	30099	1724	39710	1724	31961	1724	36845	1724	39502	1724	52868	1724	53392	1724	1492587	1732	1260130	1732	1264187	1732	1426994	1732	61845	1724	56370	1724	46523	1724	42506	1724	86778	1724	72029	1724	103511
Silane, diethoxydimethyl-	51.8	78-62-6	678	24.04	3798	1724	4832	1724	5914	1724	7857	1724	27323	1724	16083	1724	19876	1724	15427	1724	18791	1724	19462	1724	24196	1724	24356	1724	25148	1724	19379	1724	22996	1724	26620	1724	28665	1724	26662	1724	21857	1724	21681	1724	42178	1724	35887	1724	48602
Ribitol, 5TMS derivative	81.7	32381-53-6	1747	24.213	268997	1732	317035	1732	345447	1732	395785	1732	525174	1732	440031	1732	601017	1732	496737	1732	576309	1732	531216	1732	720442	1732	559444	1732	1492587	1732	1258906	1732	1264187	1732	1426994	1732	522332	1732	466580	1732	351521	1732	582715	1732	471711	1732	532216	1732	582466
1-Nonene, 4,6,8-trimethyl-	81.9	54410-98-9	1012	24.298	27550	1736	28094	1736	22328	1736	27930	1736	27910	1736	27205	1736	24887	1736	24311	1736	21792	1736	23593	1736	25636	1736	26910	1736	25434	1736	24589	1736	25711	1736	27573	1736	23431	1736	26510	1736	24336	1736	25692	1736	25276	1736	21348	1736	9669
2-Methoxyethanol, TMS derivative	52.1	18173-74-5	823	24.327	26323	1738	32352	1737	45155	1738	49519	1737	81896	1738	56716	1737	60757	1737	57746	1737	50863	1737	48483	1738	74574	1738	71204	1738	92579	1737	68971	1738	79477	1737	82330	1738	81449	1737	73338	1737	59548	1737	56760	1737	107505	1737	85608	1738	123510
Methoxyacetic acid, TMS derivative	52.4	1000366-86-6	771	24.423	94028	1742	104870	1742	147113	1742	156892	1742	174196	1742	148536	1742	126101	1742	142068	1742	109798	1742	115436	1742	133740	1742	141169	1742	88794	1742	73830	1742	95119	1742	85133	1742	128090	1742	118408	1742	88884	1742	85285	1742	128395	1742	111526	1742	156262
Nonane, 5-methyl-5-propyl-	80.8	17312-75-3	1229	24.578	78989	1749	59361	1749	51467	1749	57972	1749	19720	1749	54048	1749	65073	1749	52026	1749	55725	1749	52694	1749	55397	1749	54156	1749	55770	1749	57822	1749	63060	1749	61944	1749	56200	1749	74537	1749	75220	1749	61009	1749	48650	1749	47900	1749	43821
Tetradecane, 1-iodo-	86.1	19218-94-1	1827	24.637	136282	1752	148193	1752	135876	1752	145288	1752	146505	1752	146493	1752	104672	1752	148371	1752	118091	1752	96169	1751	133087	1751	105472	1752	154068	1751	105906	1752	141422	1752	149228	1752	154235	1751	155625	1751	142893	1751	144590	1752	97476	1751	127385	1752	139297
2,7-Nonadien-5-one, 4,6-dimethyl-	52.1	74630-80-1	1138	24.641	28583	1752	30927	1752	49896	1752	32398	1752	51601	1752	44116	1752	40426	1752	39891	1752	42430	1751	24925	1752	47642	1752	45107	1752	44641	1752	43700	1751	45889	1751	46072	1752	44993	1751	41465	1751	47878	1752	36587	1752	28890	1751	39700	1752	23484
2,5-Heptanedione, 3,3,6-trimethyl-	59.1	51513-40-7	1139	24.754	7213	1757	8128	1757	14847	1761	11543	1761	11190	1761	13406	1761	9144	1757	8440	1757	9896	1761	9691	1757	10373	1761	10343	1757	9970	1761	12999	1761	8648	1757	7872	1757	12373	1757	14879	1761	17175	1761	7484	1757	8445	1761	8213	1757	15524
4-Ethylbenzoic acid, 2-fluorophenyl ester	55.2	1000325-73-3	1821	24.873	9188	1767	1498	1763	2694	1763	2790	1763	6831	1763	8352	1763	11388	1763	3883	1762	5452	1763	11477	1763	3472	1763	5375	1762	7741	1757	4128	1757	4184	1757	6303	1757	11637	1762	6017	1763	6792	1763	4775	1763	15725	1762	20970	1763	18671
1-(2-Methoxyethoxy)-2-methyl-2-propanol, methyl ether	59.3	1000364-24-4	960	24.957	165716	1766	186629	1766	238882	1766	245249	1767	255775	1766	200739	1766	189139	1766	203031	1766	171226	1766	194885	1766	193017	1766	234310	1766	193933	1766	154520	1766	187724	1766	194211	1766	187987	1766	173032	1766	147176	1766	158418	1766	183320	1766	169347	1766	216974
tert-Butyldimethylsilylamine	58.9	1000366-62-1	686	25.131	7348	1774	7929	1774	6082	1766	8395	1774	16214	1774	18801	1774	13905	1775	16099	1775	13503	1774	14963	1774	18322	1774	20455	1774	15344	1774	10393	1774	11370	1774	13807	1775	14881	1774	14954	1775	14706	1774	12865	1774	14614	1774	16107	1775	19679
D-(-)-Tagatofuranose, pentakis(trimethylsilyl) ether (isomer 2)	71.7	1000380-12-6	1813	25.132	56216	1775	63002	1774	80411	1775	64893	1774	147360	1774	190940	1775	133452	1775	166668	1775	173396	1774	188129	1775	188914	1774	210005	1774	113359	1774	75882	1774	85134	1774	104036	1774	151517	1774	164172	1774	158816	1774	120575	1775	214892	1774	177470	1775	227905
L-Glutamine, 3TMS derivative	74.7	70591-28-5	1768	25.207	2083	1778	197	1778	131	1778	2227	1778	3876	1778	393	1778	2007	1777	4483	1777	687	1778	6988	1778	2671	1777	944	1777	11497	1778	773	1777	3069	1778	274	1776	3287	1778	186	1777	89	1777	3802	1778	235	1778	209	1778	234
1,4-Dioxane-2,5-diol, 2TMS derivative	53.4	26205-45-8	1272	25.401	9928	1775	8583	1774	9843	1782	13813	1774	21719	1787	14409	1787	26925	1777	12480	1787	15665	1787	19619	1787	523583	1826	20122	1787	856708	1827	643182	1826	787253	1827	788147	1827	26335	1787	20432	1787	17673	1787	18238	1787	34705	1787	29752	1787	40654
(Z)-5-Methoxy-3,5-dimethyl-2-hexenyltrimethylsilane	64.9	1000432-70-0	1101	25.404	165716	1766	182924	1766	152029	1775	245064	1767	262320	1775	305772	1775	6170192	1826	274537	1774	285201	1774	308019	1774	7582700	1826	405317	1774	11462740	1827	8981065	1826	10669179	1827	10683326	1827	5681309	1826	288841	1774	283232	1774	5272345	1825	329847	1774	278290	1775	343457
1,1,1,5,5,5-Hexafluoropentan-3-one	52.6	1000389-52-8	323	25.608	7473	1796	6679	1797	7332	1797	7404	1797	6328	1797	6305	1796	5886	1796	8077	1796	5114	1797	6198	1797	14242	1808	6445	1797	153085	1827	16514	1807	7803	1785	7971	1807	5558	1796	5871	1797	3822	1796	5664	1796	5852	1797	6198	1797	5129
L-(-)-Sorbofuranose, pentakis(trimethylsilyl) ether	73.7	1000380-16-4	1779	25.888	57071	1825	64894	1825	76975	1825	86295	1825	129928	1825	88267	1825	188441	1826	89802	1825	127121	1825	140761	1826	226155	1826	161609	1826	381029	1827	269318	1826	348520	1827	347464	1827	168065	1826	163347	1826	118721	1825	156307	1826	120767	1825	119788	1825	149232
Shikimic acid, 4TMS derivative	77	55520-78-0	1843	26.111	2016	1819	3089	1819	4685	1819	4750	1819	9519	1819	6622	1819	6519	1819	8946	1819	6731	1819	8811	1819	7953	1819	7147	1819	11387	1820	5976	1819	6650	1820	8462	1820	6773	1819	8623	1819	5344	1819	8335	1819	14401	1819	10444	1819	16434
Benzene, 1-pentyl-4-vinyl-	54	46234-63-3	1394	26.127	38926	1825	51773	1825	59507	1825	56959	1825	95517	1825	66998	1825	132948	1826	70472	1825	92748	1825	104428	1825	147084	1826	119720	1826	252950	1827	189406	1826	233821	1827	235197	1827	124267	1826	118107	1825	90151	1825	114627	1826	93201	1825	73604	1825	110903
Citric acid, 4TMS derivative	78.9	14330-97-3	1845	26.248	745629	1825	897770	1825	1017900	1825	1201344	1825	1804218	1825	1215567	1825	2845419	1826	1227015	1825	1770455	1825	2071232	1826	3198657	1826	2156010	1826	6114706	1827	4088203	1826	5433552	1827	5210331	1827	2418637	1826	2353510	1826	1661736	1825	2259920	1825	1707727	1825	1678657	1825	2108140
2-Ketoglutaric acid, 2TMS derivative	59.5	1027138-06-2	1621	26.678	2330035	1825	2585955	1825	2950034	1825	192089	1863	246869	1863	3201783	1825	6165892	1826	3217750	1825	4227031	1825	4711656	1826	7582700	1826	5751176	1826	11432680	1827	8981065	1826	10629707	1827	10683326	1827	5680754	1826	5470950	1825	4151701	1825	5287304	1825	4162239	1825	4194836	1825	4919870
Myristic acid, TMS derivative	80.2	18603-17-3	1850	26.819	15021	1855	15761	1855	14808	1855	15538	1855	17550	1855	17983	1855	17656	1855	16894	1855	14005	1855	16154	1855	15416	1855	13789	1855	17007	1855	14621	1855	14815	1855	15502	1855	15213	1854	16631	1855	16146	1855	15547	1854	17495	1854	14039	1855	14588
Quininic acid (5TMS)	69.2	1000413-96-5	1851	26.986	16637	1863	25090	1863	13105	1863	54191	1863	66007	1863	10603	1863	30708	1863	39485	1863	47330	1863	25425	1863	29628	1863	8733	1863	11119	1863	5753	1863	4739	1863	7033	1863	17091	1863	7311	1863	6516	1863	19290	1863	25369	1863	15371	1863	23357
Adenine, 2TMS derivative	51.7	17995-04-9	1880	27.021	1746	1865	2546	1864	4309	1865	4354	1865	8729	1865	1687	1864	1741	1865	5452	1865	2842	1865	6715	1865	7500	1865	6251	1865	2138	1864	1058	1865	1231	1865	851	1865	14303	1865	11797	1865	12232	1865	16884	1864	10830	1865	8102	1865	14106
Indole-3-acetonitrile, TMS derivative	69.6	74367-49-0	1685	27.067	1924	1867	1936	1866	3448	1866	2952	1867	9129	1867	3729	1866	7427	1867	6208	1866	6401	1866	10234	1867	10742	1866	8731	1867	5065	1867	2421	1867	2500	1866	5514	1867	9206	1867	3110	1867	3255	1867	6308	1867	3483	1866	811	1866	1814
D-Fructose, 1,3,4,5,6-pentakis-O-(trimethylsilyl)-, O-methyloxime	82.5	56196-14-6	1875	27.278	16807	1877	19493	1877	44898	1877	14057	1877	35376	1877	10240	1877	18559	1877	20165	1877	19330	1877	52073	1877	43530	1877	67283	1877	76589	1877	70631	1877	69187	1877	58299	1877	56113	1877	54165	1877	53024	1877	57646	1877	47809	1877	39423	1877	66146
D-Glucose, 3-O-methyl-2,4,5,6-tetrakis-O-(trimethylsilyl)-, O-methyloxime	61.2	56196-03-3	2064	27.359	8786	1882	13544	1881	16631	1881	14324	1881	18741	1881	20091	1881	28643	1881	18529	1881	11291	1881	22792	1881	31019	1881	11874	1882	68376	1881	39011	1881	57057	1881	68558	1881	15377	1881	54165	1877	53024	1877	60607	1877	26754	1881	39423	1877	19627
D-(-)-Fructose, pentakis(trimethylsilyl) ether, methyloxime (syn)	69.8	1000380-19-0	1869	27.478	12430	1887	17504	1887	33424	1887	16107	1887	33442	1887	20927	1888	17776	1888	21583	1888	21053	1887	44862	1887	39496	1887	54510	1887	48195	1887	43906	1887	41095	1887	68558	1881	46171	1887	45378	1887	45677	1887	44096	1887	47896	1887	32864	1887	62581
D-Xylose, 4TMS derivative	73	18623-22-8	1692	27.659	3103	1897	4635	1897	6511	1897	7105	1897	13927	1897	5623	1897	6581	1897	15686	1897	4175	1897	8039	1897	12593	1896	6632	1897	39828	1896	24695	1896	11512	1896	33830	1896	23498	1896	14736	1896	14278	1896	20213	1896	17349	1896	18354	1897	23721
d-Glucose, 2,3,4,5,6-pentakis-O-(trimethylsilyl)-, o-methyloxyme, (1E)-	83.9	130405-10-6	2173	27.768	6670	1901	10043	1901	13686	1901	12047	1901	28335	1901	10205	1901	19642	1901	17869	1901	10638	1901	17618	1901	25265	1901	16028	1901	148815	1901	93739	1901	63604	1901	115484	1901	54931	1901	37043	1901	38365	1901	68392	1901	46638	1901	49500	1901	54686
7,9-Di-tert-butyl-1-oxaspiro(4,5)deca-6,9-diene-2,8-dione	54.7	82304-66-3	1923	27.875	10781	1901	15761	1901	20316	1901	20330	1901	2326	1911	1113	1911	30935	1901	2144	1910	2301	1910	27640	1901	2487	1911	2431	1910	15406	1910	137039	1901	9504	1911	10149	1911	80317	1901	55339	1901	54898	1901	94271	1901	67606	1901	71580	1901	78285
Octadecane, 1-iodo-	85.8	629-93-6	2240	28.087	99851	1917	107226	1917	96355	1917	99389	1917	86537	1917	88330	1917	107718	1917	94042	1917	85905	1917	91174	1917	98312	1917	98185	1917	91510	1917	91400	1917	94397	1917	79835	1917	91635	1917	95880	1917	96552	1917	94324	1917	91649	1917	88247	1917	88568
d-Glucose, 2,3,4,5,6-pentakis-O-(trimethylsilyl)-, o-methyloxyme, (1Z)-	80.8	128705-73-7	2173	28.122	12648	1919	16555	1919	22468	1919	21703	1919	37174	1919	19353	1919	21005	1919	32980	1919	17535	1919	26107	1919	39973	1919	28442	1919	165144	1919	115761	1919	76897	1919	135090	1919	62697	1919	42574	1919	38301	1918	66836	1919	55782	1919	50438	1919	58543
L-Lysine, 4TMS derivative	50.4	55429-07-7	1933	28.258	358	1926	412	1926	318	1926	653	1926	471	1926	497	1926	875	1926	1210	1926	2709	1926	1658	1926	1010	1926	657	1926	2056	1926	932	1925	984	1926	1334	1926	501	1925	522	1925	616	1926	751	1926	634	1926	517	1926	802
Tetradecanoic acid, 10,13-dimethyl-, methyl ester	73	267650-23-7	1926	28.354	105	1930	351	1930	83	1931	1453	1931	4049	1931	3014	1931	5563	1931	1354	1931	7011	1930	6066	1931	5728	1931	7766	1930	5498	1930	5139	1931	5094	1931	2568	1931	1230	1931	759	1930	315	1930	6800	1930	1473	1931	3780	1931	3074
Octane, 1-iodo-	55.1	629-27-6	1238	28.392	4044	1932	3877	1932	3740	1933	3698	1932	4489	1932	4409	1933	4916	1932	3890	1932	3725	1932	4575	1932	3751	1932	3686	1932	4349	1932	3577	1932	3846	1933	3721	1932	4580	1932	4505	1932	4206	1932	4428	1932	4222	1932	4505	1932	4219
Propylene glycol, 2TMS derivative	58.9	17887-27-3	1007	28.421	9818	1934	16325	1934	23101	1934	13131	1934	31703	1934	33590	1934	22043	1934	31904	1934	30360	1934	29900	1934	32356	1934	33347	1934	271083	1934	147747	1934	167916	1934	197187	1934	20240	1934	17444	1934	12175	1934	51940	1949	40771	1934	23636	1934	39706
Ascorbic acid, 4TMS derivative	68.2	55517-56-1	1971	28.713	48120	1949	75919	1949	80493	1949	85551	1949	151298	1949	140886	1949	90542	1949	231518	1949	130459	1949	145328	1949	218245	1949	151794	1949	248351	1949	115186	1949	89961	1949	179941	1949	71095	1949	64283	1949	27966	1949	51125	1949	77887	1948	53363	1949	111119
2,2,4,4-Tetramethyl-2,4-disilathietane	55.8	91521-58-3	577	28.715	16991	1949	26223	1949	25127	1949	27516	1949	45829	1949	46523	1949	31487	1949	75066	1949	43621	1949	56492	1949	64917	1949	46071	1949	71790	1949	34644	1949	28091	1949	51190	1949	21920	1948	21164	1949	11074	1949	18085	1949	24274	1949	17475	1949	35788
(1-Methoxy-pentyl)-cyclopropane	50.1	94883-96-2	930	29.09	10026	1968	8904	1968	7995	1968	144863	1960	14632	1968	23722	1967	152708	1960	22214	1968	8033	1968	128310	1959	22906	1968	13515	1968	148946	1959	10835	1965	20653	1967	16485	1968	145188	1959	10597	1967	18425	1968	8005	1968	139334	1959	131595	1960	7564
Dodecane, 1-iodo-	88.3	4292-19-7	1635	29.27	21884	1977	22204	1977	20995	1977	18189	1977	22270	1977	18608	1977	18807	1977	23095	1977	17814	1977	24081	1976	20058	1977	21877	1977	23829	1977	20315	1976	26671	1977	26116	1977	22651	1977	22525	1977	22816	1976	23052	1976	20580	1976	20584	1977	19818
.beta.-D-(+)-Talopyranose, 5TMS derivative	77.8	1000380-17-1	1896	29.447	5800	1986	8318	1986	9213	1986	11202	1986	22161	1986	8930	1986	10639	1986	20132	1986	7773	1986	13969	1986	21425	1986	11458	1986	69904	1986	41201	1986	19521	1986	55454	1986	39020	1986	25226	1986	22143	1986	33889	1986	25194	1986	25334	1986	35606
2-Keto-l-gluconic acid, penta(O-trimethylsilyl)-	65	1000059-82-4	2073	29.67	12205	1997	14961	1998	19458	1997	26378	1997	33206	1997	25105	1997	35999	1997	33401	1997	19692	1997	28928	1997	45307	1997	27899	1997	58996	1997	41538	1997	43719	1997	50736	1997	35437	1997	24613	1997	16327	1997	20784	1997	32798	1997	24021	1997	40074
D-Gluconic acid, 6TMS derivative	59.5	34290-52-3	2043	29.738	4231	1997	4969	1998	6223	1997	8206	1997	8997	1997	4242	1997	10106	1997	9489	1997	10480	2012	6869	1997	10777	1998	8295	1997	15957	1997	11037	1997	11905	1997	12038	1998	11894	1997	8093	1997	5413	1997	7359	1997	8017	1998	7846	1998	9322
7-Propylidene-bicyclo[4.1.0]heptane	59.5	82253-09-6	1025	30.089	2581063	2052	2717241	2052	2590986	2052	2655272	2052	2812016	2052	2749962	2052	2899561	2053	2473847	2052	2222357	2052	2459563	2052	3036269	2052	2931525	2052	2918034	2052	2923365	2052	2849878	2052	3014131	2052	2673000	2052	2753586	2052	2637836	2052	2611515	2052	2541279	2052	2365101	2052	2295575
Carbonic acid, monoamide, N-hexadecyl-, benzyl ester	53.9	1000420-29-6	2938	30.094	1518	2019	2589	2019	3452	2041	2991	2019	3871	2019	5994	2019	7476	2019	2040	2019	7097	2019	5687	2019	7785	2019	6634	2019	7695	2018	7146	2019	7263	2019	6921	2019	3551	2019	3494	2019	3208	2019	6064	2019	3559	2040	5924	2019	4122
7,7-Dimethyl-3,6,8,11-tetraoxa-7-silatridecane	59.4	1000375-89-2	1229	30.201	8096	2012	11137	2012	10877	2012	12402	2011	15478	2012	8191	2012	3591	2012	11455	2011	13082	2012	13825	2012	18220	2041	12496	2012	10318	2011	7692	2011	8798	2011	16944	2041	11043	2011	9948	2011	8690	2011	8605	2011	10126	2011	9873	2011	6750
.beta.-Diethylaminoethylxathene-9-carboxylate	50.3	24539-72-8	2476	30.658	28364	2052	31374	2052	30873	2052	31095	2052	31319	2052	31587	2052	34920	2052	29630	2052	1232	2050	29657	2052	35026	2052	34556	2052	34912	2052	35094	2052	34901	2052	34939	2052	1991	2050	2326	2050	31283	2052	1651	2050	29623	2052	29848	2052	26106
Palmitic Acid, TMS derivative	80.8	55520-89-3	2050	30.753	1469055	2052	1635763	2052	1508572	2052	1590025	2052	1765059	2052	1744836	2053	1853829	2053	1558905	2052	1366935	2052	1567486	2052	1590838	2052	1521497	2052	1640459	2052	1489003	2052	1489010	2052	1531333	2052	1550268	2052	1663528	2052	1587445	2052	1592121	2052	1603445	2052	1414646	2052	1389406
1-Pentyne, 3-methyl-3-(1-methylethoxy)-	60.6	53966-55-5	841	31.283	385245	2052	407002	2053	388937	2052	397652	2052	420336	2052	411790	2053	435981	2053	369305	2052	334471	2052	369314	2052	453411	2052	441858	2052	440388	2052	442842	2052	431511	2052	455094	2052	401754	2052	411402	2052	395624	2052	386988	2052	384762	2052	352940	2052	344276
Myo-Inositol, 6TMS derivative	84.3	2582-79-8	2129	31.426	55741	2091	75489	2090	82739	2090	88224	2090	172915	2090	108205	2090	136898	2090	137904	2090	190354	2090	193879	2090	228411	2090	173918	2090	118947	2090	76327	2090	103631	2090	91067	2090	132928	2090	123350	2090	98742	2090	131000	2090	136538	2090	115655	2090	160551
Cyclohexanemethanol, 4-methylene-	70.7	1004-24-6	1090	31.626	3566	2101	4282	2101	38577	2052	6275	2101	9280	2101	2341	2101	8892	2101	2921	2101	4344	2101	6168	2101	4432	2101	19083	2101	9157	2100	9441	2101	7205	2100	8519	2101	3339	2100	3039	2101	2669	2101	14395	2101	39596	2052	13472	2101	10032
Indeno[5,4-d]pyrano[4,3-c]isobenzofuran, 11-acetoxy-1,4,4a,6,8,8a,8b,9,10,11,11a,12,13,13a(3H)-tetradecahydro-3-oxo-6,6,11a-trimethyl-	54.7	1000197-35-1	2657	31.701	12	2105	26	2105	484	2105	205	2105	926	2106	183	2105	1750	2105	458	2105	1133	2105	1529	2105	2438	2105	1237	2105	1210	2105	399	2104	1156	2105	552	2105	202	2105	1222	2105	538	2105	1196	2105	758	2104	636	2105	588
d-Galactose, 2,3,4,5,6-pentakis-O-(trimethylsilyl)-, o-methyloxyme, (1Z)-	64.2	128705-71-5	2173	31.793	3316	2111	4299	2110	7029	2110	5369	2109	10631	2109	8033	2109	13123	2109	8065	2109	10539	2110	9943	2109	9582	2110	10735	2110	20429	2110	12567	2110	18436	2110	15169	2110	8604	2110	8762	2109	8224	2110	8998	2110	10534	2109	9465	2110	13522
2,4-Difluorobenzoic acid, 2,4-dichloronaphthyl-1 ester	59.8	1000331-58-5	2495	31.889	25541	2125	27092	2126	26647	2126	29280	2126	23259	2126	24550	2125	27402	2125	24369	2125	22631	2126	25239	2125	25963	2126	22984	2125	24063	2125	23390	2125	22041	2125	23181	2125	25717	2126	28132	2125	26278	2125	25037	2125	22422	2125	22293	2125	1576
Heptadecanoic acid, TMS derivative	58.1	55517-58-3	2146	32.479	1943	2148	2489	2148	2412	2148	2245	2148	2649	2148	2983	2148	3162	2148	2502	2148	2086	2148	2460	2148	2426	2148	2323	2148	2976	2148	2336	2147	2251	2147	2386	2148	2413	2148	2596	2148	2330	2148	2239	2148	2553	2148	2163	2148	2336
Cyclohexanecarboxylic acid, 4-propyl-, 4-cyanophenyl ester, trans-	61.4	62439-33-2	2159	32.619	16919	2156	16725	2155	14191	2155	15780	2156	15098	2155	11903	2156	18450	2156	10488	2155	10788	2155	13530	2155	12108	2156	7465	2156	7808	2155	16423	2155	17196	2156	8108	2155	12595	2155	11481	2156	12669	2155	13616	2155	9355	2155	14709	2155	20011
2-Ethylbutyric acid, 2-chlorophenyl ester	58.4	1000369-63-1	1519	32.977	54315	2168	2971	2175	52720	2167	2851	2175	53549	2168	4823	2176	6957	2176	49288	2167	2861	2175	5879	2175	8498	2176	6300	2175	12958	2175	7205	2176	10083	2176	11418	2176	3928	2176	4120	2175	4032	2175	11095	2176	2959	2174	6649	2175	5843
Dodecane, 1,1-dimethoxy-	63.9	14620-52-1	1501	32.983	4709	2176	4509	2148	1963	2161	5551	2148	18147	2176	14446	2176	23765	2176	4327	2176	9625	2176	15976	2176	24594	2176	18509	2176	43028	2176	24554	2176	26911	2176	38851	2176	15843	2176	10421	2176	8527	2176	40984	2176	2390	2189	19683	2176	18250
Phytol, TMS derivative	74.3	57397-39-4	2180	32.984	17181	2176	18629	2176	6739	2176	25607	2176	61928	2176	46792	2176	76735	2176	13684	2176	31013	2176	55439	2176	78462	2176	58900	2176	143861	2176	77019	2176	93698	2176	118354	2176	56207	2176	36554	2176	30048	2176	141646	2176	6314	2176	65458	2176	62518
1,2-Ethenediol, 2TMS derivative	52.6	26327-98-0	998	33.195	38067	2190	47015	2190	22200	2188	49224	2190	20030	2176	11467	2190	9831	2188	14806	2189	25758	2187	18069	2176	30294	2187	37767	2187	40661	2187	34942	2187	46018	2187	10224	2187	28566	2187	17548	2190	23310	2187	24440	2187	32665	2188	88128	2189	38079
D-Lyxose, 4TMS derivative	58.7	73745-85-4	1651	33.24	38067	2190	30818	2190	45243	2190	49224	2190	5967	2199	11467	2190	9831	2188	14822	2189	46101	2190	18476	2176	53487	2189	59791	2189	15056	2189	51245	2189	78630	2189	10224	2187	48829	2189	17548	2190	51832	2189	39958	2189	66974	2189	55207	2189	80422
Phosphoric acid, bis[2,3-bis[(trimethylsilyl)oxy]propyl] trimethylsilyl ester	63.3	32046-28-9	2182	33.437	933	2246	832	2248	867	2246	504	2216	1040	2245	525	2245	329	2201	227	2216	1252	2217	216	2216	859	2246	359	2217	2179	2200	877	2200	1307	2200	1454	2200	1153	2245	67	2200	281	2216	431	2216	90	2215	749	2216	331
9,12-Octadecadienoic acid (Z,Z)-, TMS derivative	64	56259-07-5	2212	33.616	1965447	2247	2121928	2247	2039884	2247	2085610	2247	2306348	2247	132841	2216	194669	2217	2013351	2247	174369	2216	137600	2216	191759	2217	158690	2217	120912	2211	148221	2216	168008	2217	187386	2217	2186804	2247	125337	2241	2178389	2247	169137	2217	175481	2241	136536	2217	191259
.alpha.-Linolenic acid, TMS derivative	85.5	97844-13-8	2218	33.719	78122	2237	78830	2237	73657	2237	81549	2217	108954	2217	129735	2217	199582	2217	1391466	2247	178794	2217	125696	2216	175308	2217	140834	2216	183717	2217	159753	2216	150658	2217	175250	2217	104827	2216	93406	2217	79700	2217	174422	2217	1534488	2247	134313	2217	104090
N-(7,7-Dimethyl-2-oxobicyclo[2.2.1]hept-1-yl)methanesulfonamide	58.6	1000145-57-7	1826	33.905	12790	2217	14751	2217	17008	2237	18726	2237	16892	2237	15350	2237	18614	2237	16267	2237	14007	2237	15688	2237	17420	2237	19663	2237	17513	2237	19013	2237	15896	2237	19000	2237	17150	2237	15400	2237	20066	2237	20618	2237	15855	2237	19169	2237	18810
2-Methyl-1-(dimethyl(chloromethyl)silyloxy)propane	54.4	58307-44-1	864	33.966	12019	2231	14714	2231	13113	2231	14419	2231	10319	2231	14846	2231	13508	2231	11489	2231	9814	2231	14113	2231	12064	2231	14166	2231	14024	2231	15242	2231	12833	2231	15175	2231	12806	2231	11758	2230	14014	2231	14887	2231	11287	2231	12371	2231	12098
Dihydromyrcenol, trimethylsilyl ether	71.2	1000463-72-3	1193	34.076	165108	2237	183052	2237	170964	2237	179961	2237	169140	2237	178791	2237	184594	2237	161441	2237	147861	2237	168036	2237	166022	2237	174613	2237	187390	2237	172073	2237	170552	2237	177273	2237	169494	2237	180508	2237	183213	2237	179788	2237	148913	2237	160244	2237	158046
1,2,4,5-Tetrazine, 3,6-diethyl-	51.1	13717-91-4	1081	34.085	533922	2247	576978	2247	544113	2247	557952	2247	608862	2247	581966	2247	623542	2247	523156	2247	472834	2247	539497	2247	662252	2247	641989	2247	624338	2247	643675	2247	609712	2247	658388	2247	580394	2247	588846	2247	577044	2247	557694	2247	564416	2246	510978	2247	497125
Sinapinic acid, 2TMS derivative	72.7	27750-80-7	2267	34.139	12667	2241	14168	2241	17739	2241	16044	2241	43540	2241	38976	2241	39739	2240	36305	2241	30618	2241	37525	2241	44772	2241	33044	2241	18874	2241	11902	2241	16782	2240	16507	2241	44744	2240	55941	2240	45332	2241	47744	2240	84875	2241	59507	2241	88597
2-Ethoxy-4,4,5,5-tetramethyloxazoline	55.2	52856-01-6	1143	34.27	79530	2247	88857	2247	81111	2247	83561	2247	95121	2247	91654	2247	99436	2247	81916	2247	73430	2247	83568	2247	99569	2247	96748	2247	96614	2247	92424	2247	92684	2247	95414	2247	91730	2247	94344	2247	90538	2247	88302	2247	90445	2246	80973	2247	79085
Stearic acid, TMS derivative	83.5	18748-91-9	2246	34.277	681116	2247	799668	2247	713414	2247	760216	2247	889798	2247	865553	2247	926080	2247	772742	2247	672893	2247	760027	2247	776395	2247	740842	2247	798505	2247	713704	2247	715225	2247	731372	2247	779238	2247	819201	2247	803152	2247	799161	2247	839301	2247	712704	2247	706644
2,2,7,7,12,13,17,18-Octamethyl-2,3,7,8(22H,24H)-tetrahydroporphine	50.3	80053-11-8	3425	34.652	1625	2270	2024	2270	3254	2271	2031	2271	6363	2271	6968	2271	4232	2270	5171	2271	5311	2270	5924	2270	6028	2271	6749	2270	11742	2270	6389	2271	5128	2270	10301	2271	10522	2271	13243	2271	12302	2271	8421	2270	17683	2271	12921	2271	20216
Tetracosane, 1-iodo-	82.1	1000406-32-0	2942	35.148	14354	2299	18578	2299	23886	2299	16093	2299	18568	2299	13460	2299	15890	2299	14656	2299	14153	2299	18243	2299	12937	2299	16144	2299	16812	2299	18322	2299	14507	2299	15887	2299	11780	2298	22852	2299	16632	2299	15440	2299	14758	2299	14102	2299	13359
Glucopyranose, 1,2,3,4-tetrakis-O-(trimethylsilyl)-, bis(trimethylsilyl) phosphate, D-	63.4	28176-73-0		35.469	10507	2317	12842	2317	12399	2317	22467	2317	37735	2317	18591	2317	44626	2317	24074	2316	24836	2316	38533	2316	38992	2317	39181	2317	184856	2317	113297	2316	126135	2317	141868	2317	38883	2316	24510	2316	30272	2316	41662	2316	32657	2317	31735	2316	37329
Fumaric acid, propyl tetrahydrofurfuryl ester	59.4	1000330-57-7	1688	36.642	7823	2382	6235	2391	7204	2391	7449	2390	7275	2390	7270	2390	6274	2391	5817	2390	7882	2390	7566	2390	8281	2390	6990	2391	7106	2390	6830	2381	6059	2390	8087	2390	6685	2391	8431	2390	9120	2390	9058	2391	4590	2390	8318	2390	6542
Arachidic acid, TMS derivative	64.5	55530-70-6	2447	37.491	3705	2442	4732	2442	3570	2442	4210	2441	3816	2442	5369	2441	5801	2442	4559	2442	3734	2441	4381	2441	4228	2442	4001	2441	4567	2441	3589	2441	3887	2441	3787	2441	4287	2442	3520	2441	3998	2441	4349	2441	3942	2441	3422	2441	4093
Disilane, hexamethyl-	51.4	1450-14-2	692	37.499	24500	2442	22389	2442	21756	2442	26923	2442	27088	2443	24028	2442	37265	2443	84020	2451	20371	2442	23793	2442	29298	2442	24828	2442	35955	2443	28599	2442	25919	2442	28876	2442	26174	2442	25263	2442	21890	2442	31879	2442	45786	2443	28792	2442	38823
3-Nonanol, TMS derivative	62.6	39789-09-8	1136	37.631	56453	2451	62634	2451	58526	2451	61292	2451	58370	2450	59863	2450	64794	2451	56711	2450	52937	2450	59338	2451	57346	2450	57825	2451	62024	2450	58466	2450	55831	2450	58646	2450	57986	2450	63996	2450	61609	2450	61103	2450	56064	2450	55262	2450	53933
Methyl galactoside, 4TMS derivative	60.3	1000156-15-2	1928	38.561	18527	2509	18755	2509	21892	2509	26357	2509	36116	2509	31766	2509	26104	2509	34976	2509	27248	2509	27651	2509	37523	2509	24125	2509	43462	2508	33874	2508	34982	2509	32491	2509	30745	2509	34250	2509	28453	2509	25942	2509	47754	2508	37152	2509	36570
Triacontane, 1-iodo-	83.9	1000406-32-3	3559	39.039	61146	2540	55775	2540	46483	2540	50114	2540	38865	2540	60065	2540	47595	2540	45798	2540	43705	2540	49302	2540	41435	2540	41772	2540	36011	2540	36049	2540	55533	2539	30533	2540	52311	2540	39846	2540	41742	2540	42061	2540	41025	2540	35502	2540	33906
.alpha.-D-Lactose, 8TMS derivative	53.7	56145-25-6	3493	39.317	751	2559	1109	2559	1274	2560	1403	2559	1955	2559	2679	2559	3326	2559	11131	2559	3737	2559	5706	2559	4834	2558	4529	2559	24338	2558	9749	2558	6467	2559	15821	2559	3473	2559	1648	2558	2281	2558	1396	2559	1134	2558	459	2559	1270
6-Methyl-2-heptanol, TBDMS derivative	52.8	1000364-18-6	1186	39.921	14156	2598	15889	2598	13967	2598	14372	2598	14488	2598	15063	2598	16212	2598	12967	2598	12182	2598	14656	2598	14501	2598	14295	2598	15297	2598	13913	2598	13971	2598	14842	2598	14068	2598	15390	2598	15467	2598	14173	2598	14175	2597	13141	2598	13121
Dibenzo[j,xyz]heptaphene	63.9	192-46-1	4739	40.49	170	2635	81	2635	1456	2635	80	2635	4027	2635	156	2636	266	2635	240	2635	740	2635	868	2636	43	2637	724	2635	2159	2635	573	2635	789	2635	292	2635	757	2634	345	2634	286	2634	134	2636	93	2636	491	2634	5099
Sucrose, 8TMS derivative	75.6	19159-25-2	2712	40.5	104890	2635	120467	2635	365453	2635	151772	2635	749145	2635	223504	2635	300735	2634	223391	2635	261408	2635	673950	2635	326650	2634	369977	2634	571011	2635	300576	2634	558958	2635	366329	2635	312553	2634	285444	2635	224567	2635	238555	2635	336222	2634	232689	2634	792723
4-Hydrazino-6-pyridin-2-yl-[1,3,5]triazin-2-ylamine	64.3	175204-69-0	2109	40.538	75	2636	136	2635	1455	2635	101	2636	12344	2635	276	2636	317	2636	338	2635	122	2637	7086	2635	303	2636	218	2636	10168	2634	670	2635	603	2636	1041	2636	2336	2635	542	2635	324	2635	203	2635	153	2636	1645	2635	14409
1,1,1,2,2,3,3-Heptafluoro-3-(1,2,2,2-tetrafluoroethoxy)propane	60.3	1000389-51-2		40.876	8507	2663	11195	2662	9434	2662	10671	2663	8201	2663	10986	2663	11057	2662	8969	2663	8337	2663	11465	2662	10993	2663	9147	2662	9439	2662	7367	2662	7904	2663	7529	2662	10182	2662	12689	2662	11889	2662	11512	2663	12294	2662	10452	2662	12036
d-Glucose, 6-O-[6-deoxy-2,3,4-tris-O-(trimethylsilyl)-.alpha.-l-mannopyranosyl]-2,3,4,5-tetrakis-O-(trimethylsilyl)-	66.4	56784-10-2	3209	40.981	8503	2670	9239	2669	9095	2669	9402	2669	20045	2669	16003	2670	11880	2670	18983	2669	14648	2669	13742	2669	18084	2669	13340	2669	4159	2673	4208	2661	4810	2661	3801	2662	13114	2669	18758	2669	15560	2669	17414	2669	21216	2669	13755	2669	23609
Dispiro[1,3-dioxolane-2,2'-bicyclo[2.2.1]heptane-3',2''-(1'',3''-dioxolane)], 4',7',7'-trimethyl-	50	24022-14-8	1694	41.629	9760	2712	13254	2712	34435	2748	10818	2712	11960	2713	10457	2713	12789	2712	8602	2713	8255	2712	9304	2712	9391	2712	10063	2712	10565	2711	7600	2711	7697	2712	7209	2712	10394	2712	11563	2712	9695	2712	11432	2712	8651	2711	4273	2711	8463
Maltose, 8TMS derivative	52.3	33428-94-3	3560	41.909	1028	2732	1359	2732	3700	2732	1923	2732	4363	2732	1758	2732	4952	2732	2596	2731	2907	2732	6966	2732	4071	2732	8067	2732	14999	2731	7432	2731	10960	2732	9215	2732	10069	2731	9715	2731	6153	2732	7892	2731	9914	2731	5207	2731	12785
Aucubin, hexakis(trimethylsilyl) ether	67.8	1000380-08-5	2769	41.993	2814	2738	3237	2738	3544	2738	4646	2739	6176	2738	1637	2738	3151	2738	3486	2738	2508	2739	3086	2738	5519	2738	2966	2738	5788	2739	3556	2739	4413	2739	3870	2738	5021	2738	7969	2738	2055	2739	5259	2738	6576	2738	3463	2738	6709
Eicosane, 1-iodo-	86.3	1000406-31-8	2519	42.128	36600	2747	48142	2748	34726	2748	42493	2748	41453	2748	10375	2748	7404	2748	32023	2747	14752	2748	28714	2748	23386	2747	24713	2748	4076	2748	29717	2747	30708	2748	4672	2748	30481	2747	27893	2747	23351	2747	31486	2747	36136	2747	28451	2747	33953
2-O-(2-(4-hydroxyphenyl)-ethyl)-d-.beta.-glucopyranose, 5TMS	71.3	1036766-19-4	2742	42.333	6267	2762	7480	2763	6131	2762	4861	2762	13785	2762	5842	2762	8636	2762	10673	2762	634	2757	683	2762	4149	2762	1303	2759	19144	2762	10766	2762	14857	2762	15227	2762	11516	2762	8105	2762	3320	2762	9561	2762	7179	2762	8849	2762	9992
D-(+)-Cellobiose, (isomer 1), 8TMS derivative	66.1	1000380-07-9	2657	42.407	6240	2770	560	2767	5662	2770	7889	2769	19953	2769	14043	2769	14527	2768	14224	2768	12015	2769	9703	2768	16261	2768	13837	2768	7833	2767	7052	2767	10290	2767	10004	2767	15801	2769	19104	2768	16343	2768	14896	2768	30077	2769	18920	2769	31406
Phosphoric acid, dipentyl ethyl ester	52	1000308-90-5		43.15	897	2804	1268	2804	1272	2819	1192	2803	1198	2820	1575	2803	1021	2803	8327	2793	3982	2794	5554	2792	1372	2818	1067	2803	1401	2819	2163	2818	3251	2819	14696	2788	1725	2820	1509	2819	2206	2818	1490	2819	1335	2793	4048	2819	1313
D-(+)-Turanose, octakis(trimethylsilyl) ether	60	1000380-08-4	2693	43.174	1889	2821	1658	2822	3484	2821	2685	2821	6182	2821	3492	2821	3423	2821	3282	2821	4847	2821	5236	2821	6483	2821	6014	2821	9685	2820	7980	2820	8051	2821	8227	2821	5053	2821	8219	2821	6046	2821	6423	2821	9262	2821	6591	2821	10453
2-Butylamine, N-hexadecyl-	55.4	1000463-87-3	2112	43.179	10	2798	81	2770	27	2823			67	2820	31	2772	29	2819	13	2768	8	2818	11	2784	12	2810	54	2822	9	2818	8	2808	16	2801	44	2819	16	2767	25	2823	459	2769			57	2767	27	2767	12
Myo-Inositol, 5TMS derivative	52.6	72204-06-9	2137	44.711	1892	3002	3500	3001	245	2968	6224	3001	1799	2935	675	2976	1022	2935	15128	3001	1172	2967	590	2967	1318	2932	708	2945	1499	2933	1062	2934	1902	2933	2913	2934	979	2934	3252	3001	1997	3001	1342	2968	7603	3001	626	2933	1266
Nonane, 2,2,4,4,6,8,8-heptamethyl-	71.5	909554	1322	45.465	10618	2990	21533	2991	12356	2991	12113	2990	12596	2990	8419	2991	9037	2991	572	2990	8538	2992	9275	2990	12608	2990	18767	2990	13017	2990	5866	2990	9249	2990	10469	2991	13551	2990	8260	2991	10412	2990	12110	2990	4989	2989	9204	2990	8431
Hexacosane, 1-iodo-	82	1000406-32-1	3147	45.539	18662	2995	29213	2996	17789	2996	19528	2996	21389	2996	14248	2996	10948	2996	7650	2996	12742	2996	10413	2996	17559	2995	23149	2996	12566	2996	9954	2996	10818	2996	14866	2996	15749	2996	11123	2995	10068	2995	14977	2996	11232	2995	16759	2996	12441
Galactinol, nonakis(trimethylsilyl) ether	75.6	1000380-09-4	2946	45.61	10281	3001	19005	3001	11423	3002	30437	3001	65310	3001	30272	3001	54591	3001	81710	3001	13993	3001	40291	3001	52527	3001	24551	3001	97062	3001	56737	3001	57649	3001	59732	3001	26474	3000	21532	3001	15010	3001	36825	3001	43834	3001	19501	3001	35187
3-O-Coumaroyl-D-quinic acid, 5TMS	59	179465-94-2	3048	46.405	4148	3064	4191	3064	6925	3064	7251	3064	2291	3064	4457	3063	1455	3064	3333	3063	82213	3064	64169	3063	96818	3064	65591	3064	7449	3064	3121	3063	3920	3064	5795	3064	35734	3063	15202	3063	6088	3063	22165	3064	3112	3063	1847	3063	3757
2-O-Glycerol-.alpha.-d-galactopyranoside, hexa-TMS	74.5	1000098-09-0	2180	47.216	9561	3129	14010	3128	15585	3129	11942	3128	25531	3128	17247	3128	34053	3128	22621	3128	102137	3128	101237	3128	153864	3128	107990	3128	36868	3128	27480	3127	22771	3128	28323	3128	120422	3128	77245	3128	98860	3127	105981	3128	27760	3127	30258	3127	42839
DL-3-Aminoisobutyric acid, N-dimethylaminomethylene-, butyl ester	58.5	1000375-50-1	1483	47.599	6635	3157	8659	3157	3500	3157	5340	3157	3700	3156	6206	3157	8900	3157	7470	3158	6370	3157	10412	3157	8643	3157	6030	3157	4811	3157	4538	3157	4175	3157	946	3157	9897	3157	8894	3157	6904	3157	4211	3157	7628	3156	5498	3157	6044
Chlorogenic acid (6TMS)	64	1000413-96-0	3092	48.105	9188	3198	9195	3199	13645	3198	14472	3199	17391	3199	14286	3198	15428	3198	10319	3198	2399	3198	2656	3198	3028	3198	6842	3198	33209	3198	15427	3198	21482	3198	24393	3198	15983	3198	29933	3198	25279	3198	28427	3197	35530	3198	19070	3198	38664
Quinoline, 3,6-dimethyl-2,4-diphenyl-	55.5	109704-24-7	2825	48.107	18	3196	29	3196	15	3202	8	3205	221	3198	27	3202	20	3195	33	3200	20	3196	15	3196	41	3198	18	3129	23	3126	8	3201	15	3175	27	3201	11	3174	20	3201	52	3194	103	3199	17	3204	8	3190	21
Campesterol, TMS derivative	51.9	55429-62-4	3250	48.531	662	3231	267	3232	16	3229	435	3232	1196	3232	2133	3231	2329	3231	469	3231	3256	3232	1763	3231	1902	3231	1701	3231	1770	3230	1548	3231	1223	3231	1688	3232	1023	3230	772	3231	622	3231	91	3230	11	3230	2048	3231	1487
Stigmast-5-ene, 3.beta.-(trimethylsiloxy)-, (24S)-	59.4	25873-56-7	3350	49.723	2048	3317	1568	3317	276	3316	1826	3318	2549	3318	4258	3318	6033	3317	1420	3317	8504	3317	4786	3318	4948	3317	4417	3317	5840	3318	5055	3317	4134	3317	5334	3317	2520	3316	2142	3316	1649	3316	6937	3317	507	3316	5420	3317	3206
Phenol, 2,4-bis(1,1-dimethylethyl)-, phosphite (3:1)	72.8	31570-04-4	3397	50.835	736078	3388	898857	3388	756095	3388	853875	3389	732755	3388	792263	3388	876504	3388	707208	3388	589010	3388	780164	3388	777322	3387	700528	3387	534233	3387	475986	3387	437568	3387	483208	3388	626071	3387	791494	3388	795967	3388	721542	3387	762825	3387	677824	3387	674382
[truncated: 99 more columns]

## Sheet: Raw Sub-selected
		0-K2-1	0-K2-2	0-K2-3	0-K2-4	0-K3-1	0-K3-2	0-K3-3	0-K3-4	0-K4-1	0-K4-2	0-K4-3	0-K4-4	0-K5-1	0-K5-2	0-K5-3	0-K5-4	0-K6-1	0-K6-2	0-K6-3	0-K6-4	0-K7-1	0-K7-2-2	0-K7-3	0-K7-4	0-K8-1	0-K8-2	0-K8-3	0-K8-4	0-K9-1	0-K9-2	0-K9-3	0-K9-4	0-K10-1	0-k10-2	0-K10-3	0-K10-4		12-K2-1	12-K2-2	12-K2-3	12-K2-4	12-K3-1	12-K3-2	12-K3-3	12-K3-4	12-K4-4	12-k4-1	12-K4-2
		Area	Area	Area	Area	Area	Area	Area	Area	Area	Area	Area	Area	Area	Area	Area	Area	Area	Area	Area	Area	Area	Area	Area	Area	Area	Area	Area	Area	Area	Area	Area	Area	Area	Area	Area	Area		Area	Area	Area	Area	Area	Area	Area	Area	Area	Area	Area
Valine, 2TMS derivative	Valine	6491	9509	12179	13971	23885	10990	19085	18942	38826	24487	24716	16453	38284	33622	29902	36419	16792	12763	13162	17067	13687	9624	17378	16084	33714	21801	28758	31174	71296	46003	55565	54380	13923	25274	15669	11833		45145	40833	41238	40430	57627	35162	50473	29582	27918	52837	44308
Ethanolamine, 3TMS derivative	Ethanolamine	109300	145904	175834	200642	307259	204159	284364	283164	207143	233731	295537	229308	589658	371686	430982	497032	242617	222447	169231	222111	275499	205558	321134	264596	275762	268843	313559	248160	711148	442687	528231	560218	207243	272393	228897	180462		400987	277556	311428	298497	442915	283369	388894	287094	257932	382680	319602
Glycerol, 3TMS derivative	Glycerol	206912	233018	285981	298087	405360	310288	401176	366709	389904	445439	576599	495629	864005	539892	622542	690006	407034	383017	314053	373045	410173	322848	446574	374189	417532	361878	447825	396860	821242	521954	666580	647337	337454	434351	366079	303344		519834	417229	460276	437584	588061	414519	590401	521322	463228	767639	737614
Niacin, TBDMS derivative	Niacin	802	83	212	1478	2195	116	2481	2302	403	5452	7752	5572	9259	6400	5755	6238	3198	2761	1808	3457	1532	84	2006	1740	606	275	2498	1378	6832	5352	4268	5325	4969	5536	4463	3656		2827	712	2024	2110	1820	1262	2508	2092	5455	6709	8135
L-Isoleucine, 2TMS derivative	L-Isoleucine	3100	3966	4748	5436	9619	5022	7909	8365	20928	12993	13044	8918	13933	10815	10483	13028	9255	7039	7609	9041	7592	5744	11083	10597	12289	11246	14426	13067	25617	17217	20008	19458	5166	10153	5425	5545		25882	24823	22399	24083	38074	23934	35835	25613	21618	39859	28597
L-Proline, 2TMS derivative	L-Proline	10616	13238	18318	19580	34149	17821	30821	31293	34395	27364	31986	25737	80575	87503	66112	84093	32646	19508	16320	20499	22614	16320	28258	25580	44297	27196	42079	34266	98644	39593	71223	65514	23111	28550	20528	14552		63123	39534	44112	44013	68599	37606	47650	31120	39218	59496	45595
2-Butenedioic acid, (Z)-, 2TMS derivative	Maleic acid	17145	29792	27137	28319	142351	18466	30781	28950	33823	20918	39582	34040	92403	86651	88147	84086	32368	39822	36584	29707	14916	27379	19191	192543	40347	28901	47125	29364	51004	34814	56332	63746	39197	41132	61064	46193		67704	41689	56957	53020	37730	49992	53035	19211	36242	64448	45211
Glycine, 3TMS derivative	Glycine	13323	18130	27303	23762	508528	20837	21062	29664	126392	40911	26960	27863	30580	66955	16583	35352	17315	19562	28716	17926	29393	13849	33633	662925	59098	32365	24797	41915	18102	27332	32475	27446	18952	39722	20598	15262		74494	73266	58781	49962	124740	72147	89807	104777	34053	95998	57284
Butanedioic acid, 2TMS derivative	Succinic acid	86724	101382	83852	91550	149766	142168	218185	130051	167219	120100	224009	132640	521702	317975	432247	481737	198457	223563	127929	195655	233320	150274	170270	205408	53358	161408	129546	59651	363898	242207	329168	305654	222007	181705	215491	238781		106408	73716	96241	92771	109324	65293	66118	64665	138991	158930	119833
Glyceric acid, 3TMS derivative	Glyceric acid	9571	7484	52793	30504	78061	6718	12971	42361	14102	77939	16427	63662	24314	17090	25008	19651	14312	12112	15580	11108	13243	15037	135226	28467	41103	105151	14754	52553	31988	25932	29618	39654	9612	118380	16249	12278		139802	126994	121631	105830	243239	163291	292434	232067	69909	339222	206292
2-Butenedioic acid, (E)-, 2TMS derivative	Fumaric acid	8880	7822	9754	11055	9381	5872	15589	8587	5457	10745	9341	7080	71596	42868	56919	56006	9194	8608	5791	7623	9349	8945	10027	11477	7302	11126	11270	7982	20785	12669	20332	19760	19345	21068	27242	20143		32309	19909	22813	23351	31114	14239	17530	13997	26261	31310	20033
Serine, 3TMS derivative	Serine	18811	23316	34279	36472	73461	29304	49011	51607	201321	74576	76353	46721	167541	153307	128779	178161	44658	32965	30803	52561	31504	28109	34968	45046	84078	42649	84674	84122	253839	106824	203313	152710	48675	77254	43875	36080		205216	192658	186836	152180	330530	227626	260402	153760	135538	302107	184143
L-Threonine, 3TMS derivative	L-Threonine	8043	14826	20081	22680	43138	16161	29510	29501	71996	50743	49178	33350	84169	85393	74811	89716	23761	19771	23656	25732	18180	15293	28650	29530	44293	28844	36695	47623	70730	45190	76190	65268	17072	35289	19597	14011		116686	118233	110194	104776	180553	120790	125602	96231	101045	200783	167924
L-Aspartic acid, 2TMS derivative	L-Aspartic acid	106	551	519	1271	2386	1754	9548	2252	2918	4159	7818	2345	21729	12807	15767	15385	4512	3463	804	2682	10993	4208	15934	5852	8212	4303	17281	5563	32297	29680	24313	38974	10996	14834	16682	17350		4971	4197	4261	2633	6124	4979	3590	2304	4925	11097	11998
Timonacic, 2TMS derivative	Timonacic	3801	6521	4260	13312	11688	4060	13352	13111	6462	14566	18442	9649	27546	14289	11072	18007	11992	6718	4385	16096	9938	5498	7917	9627	14040	8100	26118	16455	65926	32326	53983	51682	10638	9642	5427	3870		27390	11415	19923	18722	28167	8680	11006	9209	17014	22426	18629
Malic acid, 3TMS derivative	Malic acid	101687	116311	171184	191530	297253	113505	234933	295846	157460	274815	388020	305773	777579	582192	719915	676965	363566	225427	205927	459246	517791	494363	651911	974254	278254	533141	276714	269670	549725	307124	638341	393156	214372	304841	202313	196223		3605191	2114694	3053264	3167056	4080873	2147044	3482726	3546354	3170436	3760392	3171313
L-5-Oxoproline, , 2TMS derivative	L-5-Oxoproline	237655	271156	335098	368395	619960	375360	637762	460807	561791	536409	584565	427584	1691857	1090266	1270647	1328012	565401	437271	341070	442101	463181	435020	594864	509111	651330	495905	732149	668587	1836662	908257	1286652	1470608	515510	664631	649141	486494		493115	410281	441216	407506	714329	437273	390774	396020	475982	769309	642225
L-Cysteine, 3TMS derivative	L-Cysteine	5047	7247	4131	12796	10333	4065	11718	10760	6552	12416	14549	7323	28676	13937	10715	19255	9448	5356	3784	14173	5764	4041	4818	7481	11379	6230	20986	13166	56210	23283	45569	41464	7192	7319	4170	2786		26061	10387	17791	17541	22832	7321	8234	8301	13639	16537	12004
L-Glutamine, 3TMS derivative	L-Glutamine	2083	197	131	2227	3876	393	2007	4483	687	6988	2671	944	11497	773	3069	274	3287	186	89	3802	235	209	234	2042	3542	2135	5114	3768	59498	14593	32540	25549	114	1472	83	52		34103	18857	15227	15884	33904	11083	15946	4050	14517	31187	14108
Shikimic acid, 4TMS derivative	Shikimic acid	2016	3089	4685	4750	9519	6622	6519	8946	6731	8811	7953	7147	11387	5976	6650	8462	6773	8623	5344	8335	14401	10444	16434	13194	8878	14386	15226	11503	25469	30881	24927	22799	3897	5908	3002	2588		33292	22220	26044	29000	34214	26865	47261	31544	36870	49812	38083
Citric acid, 4TMS derivative	Citric acid	745629	897770	1017900	1201344	1804218	1215567	2845419	1227015	1770455	2071232	3198657	2156010	6114706	4088203	5433552	5210331	2418637	2353510	1661736	2259920	1707727	1678657	2108140	1947188	3178624	1756736	3437879	2827235	5445515	2796570	4882173	4506104	2509869	2556774	2648705	2244998		1355842	1155229	1296153	1283421	1864733	1197424	1294034	941398	1616006	3183522	1833506
Myristic acid, TMS derivative	Myristic acid	15021	15761	14808	15538	17550	17983	17656	16894	14005	16154	15416	13789	17007	14621	14815	15502	15213	16631	16146	15547	17495	14039	14588	15760	14031	14166	44336	44415	40874	43408	45523	43784	16779	17537	16999	16491		15676	14304	16182	15061	18118	17934	18025	12202	16568	15302	14537
Quininic acid (5TMS)	Quininic acid	16637	25090	13105	54191	66007	10603	30708	39485	47330	25425	29628	8733	11119	5753	4739	7033	17091	7311	6516	19290	25369	15371	23357	32269	39974	28137	53413	48325	112461	52055	61055	80619	14844	21985	4730	3255		111847	36017	77855	79261	77943	23320	64276	78969	33306	44592	39252
D-Fructose, 1,3,4,5,6-pentakis-O-(trimethylsilyl)-, O-methyloxime	Fructose	16807	19493	44898	14057	35376	10240	18559	20165	19330	52073	43530	67283	76589	70631	69187	58299	56113	54165	53024	57646	47809	39423	66146	44077	99377	72130	34207	118359	359453	166780	389033	153318	38153	60322	14705	39858		229367	180777	206379	369468	361106	227460	281234	616200	195850	630799	118414
D-Glucose, 3-O-methyl-2,4,5,6-tetrakis-O-(trimethylsilyl)-, O-methyloxime	Glucose	8786	13544	16631	14324	18741	20091	28643	18529	11291	22792	31019	11874	68376	39011	57057	68558	15377	54165	53024	60607	26754	39423	19627	19800	100000	72175	34056	118549	109474	56052	60406	82730	41274	50155	48570	38993		29637	14988	19738	369468	360360	227460	279541	616200	195850	630799	17071
D-Xylose, 4TMS derivative	D-Xylose	3103	4635	6511	7105	13927	5623	6581	15686	4175	8039	12593	6632	39828	24695	11512	33830	23498	14736	14278	20213	17349	18354	23721	14857	20349	23182	17374	21370	44880	47396	36310	39221	26867	37819	5508	14842		50626	26087	32491	48267	23054	26750	27748	13652	15578	46644	17364
L-Lysine, 4TMS derivative	L-Lysine	358	412	318	653	471	497	875	1210	2709	1658	1010	657	2056	932	984	1334	501	522	616	751	634	517	802	815	1081	897	2044	1926	2960	1876	2643	2026	635	1133	512	509		1330	784	1161	835	1481	826	1039	569	1384	1228	947
Ascorbic acid, 4TMS derivative	Ascorbic acid	48120	75919	80493	85551	151298	140886	90542	231518	130459	145328	218245	151794	248351	115186	89961	179941	71095	64283	27966	51125	77887	53363	111119	67453	44102	74777	66831	36992	112741	76155	51061	67276	100247	132509	86522	70710		272351	103104	114049	158699	90696	85873	104623	82035	90641	231961	221168
.beta.-D-(+)-Talopyranose, 5TMS derivative	Beta-D-(+)-Talopyranose	5800	8318	9213	11202	22161	8930	10639	20132	7773	13969	21425	11458	69904	41201	19521	55454	39020	25226	22143	33889	25194	25334	35606	21550	34468	33377	30560	39297	75066	73200	70181	72530	44913	59448	10504	24049		84329	41058	53148	77603	41086	36858	40853	19313	25499	78529	27465
Palmitic Acid, TMS derivative	Palmitic acid	1469055	1635763	1508572	1590025	1765059	1744836	1853829	1558905	1366935	1567486	1590838	1521497	1640459	1489003	1489010	1531333	1550268	1663528	1587445	1592121	1603445	1414646	1389406	1509240	1391038	1395536	4890952	4955316	4615534	4787643	5003675	4725322	1700699	1786251	1734909	1621488		1463782	1458024	1582618	1476708	1730115	1657578	1693750	1298217	1578827	1492908	1570443
Myo-Inositol, 6TMS derivative	Myo-Inositol	55741	75489	82739	88224	172915	108205	136898	137904	190354	193879	228411	173918	118947	76327	103631	91067	132928	123350	98742	131000	136538	115655	160551	145179	164936	132340	229462	177248	374010	198787	269773	307769	77430	89490	88576	75062		208555	146663	172881	151016	240695	156554	177375	183185	224305	327130	307428
d-Galactose, 2,3,4,5,6-pentakis-O-(trimethylsilyl)-, o-methyloxyme, (1Z)-	Galactose	3316	4299	7029	5369	10631	8033	13123	8065	10539	9943	9582	10735	20429	12567	18436	15169	8604	8762	8224	8998	10534	9465	13522	11744	13372	11014	18542	13642	27082	17588	22304	21808	9343	12349	13492	11349		10940	11028	11645	12480	19781	13824	21020	14887	15118	18881	17637
Phytol, TMS derivative	Phytol	17181	18629	6739	25607	61928	46792	76735	13684	31013	55439	78462	58900	143861	77019	93698	118354	56207	36554	30048	141646	6314	65458	62518	105667	31639	13798	39138	37371	162039	200389	207768	212021	21233	133984	100765	70107		29488	19999	25152	16250	126836	37867	9820	35519	14879	83211	5838
.alpha.-Linolenic acid, TMS derivative	alpha-Linolenic acid	78122	78830	73657	81549	108954	129735	199582	1391466	178794	125696	175308	140834	183717	159753	150658	175250	104827	93406	79700	174422	1534488	134313	104090	143421	95108	1324333	218547	223157	209202	196239	191099	181090	86475	176342	247935	201310		69557	1374983	1464230	73753	163774	1501313	1502988	76602	87090	207768	1450814
Sinapinic acid, 2TMS derivative	Sinapinic acid	12667	14168	17739	16044	43540	38976	39739	36305	30618	37525	44772	33044	18874	11902	16782	16507	44744	55941	45332	47744	84875	59507	88597	67391	69550	72942	86662	74336	59526	99940	67095	75007	15692	21670	13691	14573		19656	18228	18207	25076	37247	47687	72982	39129	29488	36385	53268
Stearic acid, TMS derivative	Stearic acid	681116	799668	713414	760216	889798	865553	926080	772742	672893	760027	776395	740842	798505	713704	715225	731372	779238	819201	803152	799161	839301	712704	706644	771842	688383	702427	2540619	2634943	2461640	2595853	2673110	2494168	878011	914763	873172	822245		703600	690490	762817	707853	856971	812154	830354	602044	778455	720787	784459
Sucrose, 8TMS derivative	Sucrose	104890	120467	365453	151772	749145	223504	300735	223391	261408	673950	326650	369977	571011	300576	558958	366329	312553	285444	224567	238555	336222	232689	792723	234360	592153	701784	281146	906031	936686	572572	621989	878735	214125	386310	360546	166428		1835497	1520728	1770065	1668892	2383940	1656476	2735504	1962967	1423870	2746885	2228986
3-O-Coumaroyl-D-quinic acid, 5TMS	3-O-Coumaroyl-D-quinic acid	4148	4191	6925	7251	2291	4457	1455	3333	82213	64169	96818	65591	7449	3121	3920	5795	35734	15202	6088	22165	3112	1847	3757	2844	4242	4320	6756	3287	8774	15052	7819	8380	1525	2842	2311	1617		11233	8727	11302	17662	6247	4275	7618	6914	74633	79263	108069
Chlorogenic acid (6TMS)	Chlorogenic acid	9188	9195	13645	14472	17391	14286	15428	10319	2399	2656	3028	6842	33209	15427	21482	24393	15983	29933	25279	28427	35530	19070	38664	25020	22000	29547	35205	14894	97092	118692	80921	104003	11325	16376	11371	9695		27308	20678	22622	20017	21714	22810	35058	7588	2076	3284	3152
Campesterol, TMS derivative	Campesterol	662	267	16	435	1196	2133	2329	469	3256	1763	1902	1701	1770	1548	1223	1688	1023	772	622	91	11	2048	1487	3436	587	49	927	981	3603	2521	4285	3913	376	1635	2144	1810		671	32	57	14	2034	212	47	238	479	2327	14
Ribitol, 5TMS derivative		268997	317035	345447	395785	525174	440031	601017	496737	576309	531216	720442	559444	1492587	1258906	1264187	1426994	522332	466580	351521	582715	471711	532216	582466	533079	491702	461744	560712	511007	1268214	627266	860493	934607	602117	546589	650503	487182		748818	563479	474828	522231	858458	512682	533063	655410	590838	797941	698400
[truncated: 25 more columns]

## Sheet: Normalized
	0-K2-1	0-K2-2	0-K2-3	0-K2-4	0-K3-1	0-K3-2	0-K3-3	0-K3-4	0-K4-1	0-K4-2	0-K4-3	0-K4-4	0-K5-1	0-K5-2	0-K5-3	0-K5-4	0-K6-1	0-K6-2	0-K6-3	0-K6-4	0-K7-1	0-K7-2-2	0-K7-3	0-K7-4	0-K8-1	0-K8-2	0-K8-3	0-K8-4	0-K9-1	0-K9-2	0-K9-3	0-K9-4	0-K10-1	0-k10-2	0-K10-3	0-K10-4		12-K2-1	12-K2-2	12-K2-3	12-K2-4	12-K3-1	12-K3-2	12-K3-3	12-K3-4	12-K4-4	12-k4-1	12-K4-2	21-K4-3
	Area	Area	Area	Area	Area	Area	Area	Area	Area	Area	Area	Area	Area	Area	Area	Area	Area	Area	Area	Area	Area	Area	Area	Area	Area	Area	Area	Area	Area	Area	Area	Area	Area	Area	Area	Area		Area	Area	Area	Area	Area	Area	Area	Area	Area	Area	Area	Area
Valine	0.00229239	0.00284939	0.0033493	0.00335345	0.00432062	0.00237267	0.00301668	0.00362262	0.00640016	0.00437913	0.00325914	0.00279391	0.0024367	0.00253719	0.00224705	0.00242454	0.00305407	0.00259866	0.00355708	0.00278243	0.00275649	0.00171787	0.00283435	0.00286633	0.00651376	0.00448538	0.00487239	0.00579548	0.00534068	0.0069672	0.00613448	0.00552756	0.00219672	0.00439275	0.00228831	0.00230742	#DIV/0!	0.00572739	0.00688426	0.00825059	0.0073547	0.00637721	0.00651552	0.00899506	0.00428784	0.0044889	0.00629058	0.006027	0.00604139
Ethanolamine	0.0386008	0.0437203	0.0483554	0.04816	0.0555808	0.0440767	0.0449481	0.0541546	0.0341459	0.0417993	0.0389705	0.0389391	0.0375305	0.0280483	0.0323871	0.0330892	0.0441264	0.0452923	0.0457354	0.0362107	0.055484	0.0366919	0.0523768	0.0471536	0.053279	0.0553122	0.0531255	0.0461348	0.053271	0.0670453	0.0583177	0.0569445	0.0326981	0.0473433	0.0334283	0.0351899	#DIV/0!	0.0508719	0.0467947	0.0623082	0.0543001	0.0490145	0.0525083	0.0693069	0.0416135	0.0414725	0.0455605	0.0434739	0.0440617
Glycerol	0.0730738	0.0698242	0.0786465	0.0715496	0.0733266	0.0669893	0.063412	0.0701324	0.0642726	0.0796601	0.0760324	0.0841635	0.0549921	0.0407415	0.0467822	0.0459361	0.07403	0.0779858	0.0848741	0.0608175	0.0826066	0.057628	0.0728361	0.0666842	0.0806699	0.0744534	0.0758738	0.0737792	0.061518	0.0790504	0.0735917	0.0657999	0.0532424	0.0754925	0.0534625	0.0591518	#DIV/0!	0.0659496	0.0703429	0.0920885	0.0796017	0.0650769	0.0768104	0.105219	0.0755643	0.0744818	0.0913924	0.100334	0.102555
Niacin	0.000283237	2.48711e-05	5.83013e-05	0.000354763	0.000397059	2.50437e-05	0.00039216	0.000440253	6.64314e-05	0.000975008	0.00102221	0.000946189	0.000589316	0.000482959	0.000432472	0.000415286	0.000581642	0.000562165	0.000488619	0.000563595	0.000308536	1.49939e-05	0.000327178	0.000310085	0.000117083	5.6579e-05	0.00042323	0.00025618	0.000511775	0.000810565	0.000471195	0.00054127	0.000783992	0.000962185	0.00065178	0.000712916	#DIV/0!	0.000358652	0.00012004	0.000404947	0.000383834	0.000201408	0.000233849	0.000446964	0.00030323	0.000877102	0.00079875	0.00110657	0.00128863
L-Isoleucine	0.00109481	0.00118842	0.00130573	0.0013048	0.00174	0.00108422	0.00125014	0.00159979	0.00344982	0.0023236	0.00172003	0.00151438	0.000886806	0.000816125	0.000787767	0.00086732	0.00168327	0.00143321	0.00205636	0.00147395	0.00152899	0.0010253	0.00180763	0.00188849	0.00237431	0.00231377	0.00244416	0.00242925	0.00191893	0.00260753	0.00220892	0.00197785	0.000815074	0.00176464	0.000792272	0.00108127	#DIV/0!	0.00328356	0.00418505	0.00448142	0.00438098	0.0042134	0.00443497	0.00638635	0.00371254	0.00347593	0.00474547	0.00388991	0.00373518
L-Proline	0.00374919	0.00396679	0.00503756	0.00469977	0.0061773	0.00384744	0.00487173	0.00598473	0.00566974	0.00489364	0.00421779	0.00437044	0.00512843	0.00660318	0.00496813	0.00559837	0.00593755	0.00397201	0.00441055	0.00334195	0.00455434	0.0029131	0.00460887	0.00455861	0.00855847	0.00559535	0.00712934	0.0063703	0.00738927	0.0059964	0.00786315	0.0066593	0.00364638	0.00496214	0.00299793	0.00283763	#DIV/0!	0.0080082	0.00666525	0.0088256	0.00800649	0.00759141	0.00696839	0.00849196	0.00451076	0.00630581	0.00708338	0.00620207	0.00613255
Maleic acid	0.00605499	0.00892722	0.00746284	0.00679739	0.0257502	0.0039867	0.00486541	0.00553663	0.00557546	0.00374087	0.00521942	0.00578038	0.00588126	0.00653889	0.00662399	0.0055979	0.00588698	0.00810813	0.00988698	0.00484313	0.003004	0.00488712	0.00313005	0.0343131	0.0077953	0.00594614	0.00798427	0.00545899	0.00382063	0.00527261	0.00621916	0.00647959	0.00618437	0.00714895	0.00891784	0.00900759	#DIV/0!	0.00858938	0.00702858	0.0113955	0.00964497	0.00417534	0.00926352	0.00945165	0.00278459	0.0058273	0.00767295	0.00614984	0.00632689
Glycine	0.0047052	0.00543268	0.00750849	0.00570358	0.0919889	0.00449858	0.00332917	0.00567318	0.0208347	0.00731632	0.00355504	0.00473146	0.00194635	0.00505258	0.00124616	0.00235351	0.00314919	0.003983	0.00776062	0.00292247	0.00591959	0.00247203	0.00548553	0.11814	0.0114181	0.00665883	0.00420129	0.00779231	0.00135599	0.00413946	0.0035853	0.0027898	0.00299018	0.00690389	0.00300815	0.00297607	#DIV/0!	0.0094508	0.0123523	0.0117605	0.00908868	0.0138042	0.0133688	0.016005	0.0151872	0.00547533	0.0114292	0.00779207	0.00894687
Succinic acid	0.0306278	0.0303793	0.0230598	0.0219747	0.0270915	0.0306932	0.0344875	0.024872	0.0275647	0.0214781	0.0295386	0.0225238	0.0332052	0.0239951	0.0324821	0.0320709	0.0360947	0.0455195	0.0345733	0.0318976	0.0469894	0.0268238	0.027771	0.0366058	0.0103091	0.0332084	0.0219486	0.0110896	0.0272591	0.0366825	0.0363407	0.0310688	0.0350275	0.0315813	0.0314705	0.0465621	#DIV/0!	0.0134996	0.0124282	0.0192552	0.0168761	0.0120982	0.0120988	0.0117832	0.00937303	0.0223482	0.0189216	0.0163003	0.0159773
Glyceric acid	0.00338013	0.00224259	0.0145184	0.00732185	0.0141206	0.00145038	0.00205027	0.00810146	0.0023246	0.0139382	0.00216612	0.0108105	0.00154753	0.00128965	0.00187928	0.00130824	0.00260302	0.00246612	0.00421056	0.00181094	0.00266707	0.00268409	0.0220553	0.0050731	0.00794136	0.0216339	0.00249973	0.00976999	0.00239617	0.00392742	0.00326988	0.00403071	0.00151655	0.0205751	0.00237302	0.0023942	#DIV/0!	0.0177362	0.0214106	0.024335	0.0192517	0.0269177	0.0302578	0.0521162	0.0336375	0.0112406	0.0403866	0.0280609	0.0390511
Fumaric acid	0.00313609	0.00234387	0.00268241	0.00265352	0.00169695	0.00126773	0.00246408	0.00164225	0.000899543	0.00192158	0.00123174	0.00120227	0.00455693	0.00323492	0.0042773	0.00372852	0.00167217	0.00175267	0.00156504	0.00124278	0.00188284	0.00159667	0.0016354	0.00204532	0.00141079	0.00228908	0.00190945	0.00148391	0.00155697	0.00191873	0.00224469	0.00200854	0.00305219	0.00366173	0.00397844	0.00392786	#DIV/0!	0.00409893	0.00335657	0.00456425	0.00424782	0.00344319	0.00263849	0.00312411	0.00202883	0.00422247	0.00372766	0.00272499	0.00261051
Serine	0.00664336	0.00698667	0.00942693	0.00875435	0.0132885	0.00632655	0.00774694	0.00986974	0.0331862	0.0133368	0.0100682	0.00793376	0.0106636	0.0115689	0.00967737	0.0118608	0.00812225	0.00671198	0.00832464	0.00856902	0.00634473	0.00501743	0.00570327	0.00802765	0.0162444	0.00877468	0.0143461	0.0156389	0.0190147	0.0161786	0.0224461	0.0155225	0.00767978	0.0134271	0.00640754	0.00703556	#DIV/0!	0.0260351	0.0324813	0.0373807	0.0276833	0.0365776	0.0421791	0.0464076	0.0222871	0.021793	0.0359678	0.0250481	0.0262189
L-Threonine	0.0028405	0.00444263	0.0055224	0.00544386	0.00780334	0.00348906	0.00466451	0.00564201	0.011868	0.00907462	0.00648478	0.00566321	0.00535718	0.00644396	0.00562183	0.00597271	0.00432157	0.00402556	0.00639313	0.00419509	0.00366135	0.00272978	0.0046728	0.00526254	0.00855769	0.00593441	0.00621714	0.00885347	0.00529828	0.00684407	0.00841152	0.0066343	0.00269356	0.00613341	0.00286196	0.00273213	#DIV/0!	0.0148036	0.0199335	0.0220468	0.01906	0.0199806	0.0223824	0.0223842	0.0139484	0.0162469	0.0239045	0.0228419	0.0220444
L-Aspartic acid	3.74354e-05	0.000165108	0.000142728	0.000305077	0.000431609	0.000378678	0.00150921	0.000430691	0.000481009	0.000743775	0.00103091	0.000398208	0.001383	0.000966446	0.00118484	0.00102423	0.000820627	0.000705099	0.000217284	0.000437246	0.00221393	0.000751124	0.00259883	0.00104288	0.00158661	0.000885307	0.00292788	0.0010342	0.00241932	0.00449506	0.0026842	0.00396159	0.00173491	0.00257823	0.00243625	0.00338323	#DIV/0!	0.000630654	0.000707595	0.000852509	0.000478974	0.000677704	0.000922609	0.000639793	0.000333959	0.000791884	0.00132117	0.00163203	0.00112889
Timonacic	0.00134238	0.00195403	0.00117153	0.00319527	0.00211427	0.000876529	0.00211049	0.00250745	0.00106521	0.00260491	0.00243183	0.00163851	0.00175324	0.00107828	0.000832029	0.00119879	0.00218106	0.00136785	0.00118506	0.00262413	0.00200146	0.000981387	0.00129126	0.00171563	0.00271262	0.00166651	0.00442511	0.00305911	0.00493842	0.0048958	0.00595982	0.00525332	0.00167843	0.00167583	0.000792564	0.000754646	#DIV/0!	0.00347488	0.00192452	0.00398604	0.00340575	0.00311706	0.0016084	0.00196144	0.00133482	0.00273566	0.00266996	0.00253401	0.00209337
Malic acid	0.0359122	0.0348528	0.0470766	0.0459728	0.0537708	0.024505	0.0371348	0.05658	0.025956	0.0491465	0.0511657	0.0519238	0.0494913	0.0439336	0.0540995	0.0450679	0.0661242	0.045899	0.0556526	0.0748709	0.10428	0.0882433	0.106326	0.173622	0.0537605	0.109689	0.0468829	0.0501337	0.0411791	0.0465142	0.070474	0.0399631	0.0338229	0.0529829	0.029546	0.0382633	#DIV/0!	0.457378	0.356528	0.610874	0.576125	0.451604	0.397847	0.620675	0.514035	0.50977	0.447699	0.431378	0.474194
L-5-Oxoproline	0.0839311	0.0812523	0.092154	0.0884256	0.112146	0.0810379	0.100808	0.0881285	0.0926068	0.0959287	0.0770828	0.0726087	0.107683	0.082274	0.0954855	0.0884104	0.102833	0.0890324	0.0921756	0.0720757	0.0932821	0.0776506	0.0970221	0.0907287	0.125841	0.102028	0.124046	0.124295	0.137582	0.137556	0.142049	0.149483	0.0813354	0.115516	0.0948011	0.0948658	#DIV/0!	0.0625598	0.0691715	0.0882752	0.0741302	0.0790502	0.0810267	0.0696419	0.0574021	0.0765325	0.0915912	0.0873588	0.0847006
L-Cysteine	0.00178242	0.00217157	0.00113605	0.00307142	0.00186916	0.000877609	0.00185221	0.00205783	0.00108005	0.00222042	0.00191848	0.00124353	0.00182517	0.00105172	0.000805201	0.00128187	0.00171837	0.00109053	0.00102264	0.00231062	0.00116084	0.000721314	0.000785814	0.00133319	0.0021985	0.00128177	0.0035556	0.00244766	0.00421061	0.00352623	0.0050309	0.00421469	0.00113473	0.00127208	0.00060899	0.000543267	#DIV/0!	0.00330627	0.0017512	0.00355949	0.00319092	0.00252667	0.00135658	0.00146743	0.00120321	0.002193	0.00196884	0.00163285	0.00139362
L-Glutamine	0.00073564	5.90313e-05	3.60258e-05	0.000534545	0.000701139	8.48463e-05	0.000317237	0.000857365	0.000113247	0.0012497	0.000352207	0.000160302	0.00073176	5.83324e-05	0.000230626	1.82411e-05	0.000597829	3.78713e-05	2.40526e-05	0.00061984	4.73277e-05	3.73063e-05	3.81653e-05	0.000363905	0.000684337	0.000439259	0.000866452	0.000700499	0.00445691	0.00221012	0.00359248	0.00259698	1.79865e-05	0.000255841	1.21214e-05	1.01399e-05	#DIV/0!	0.00432653	0.0031792	0.0030465	0.00288949	0.00375194	0.00205368	0.00284182	0.000587037	0.00233417	0.00371301	0.00191904	0.00134579
Shikimic acid	0.000711978	0.000925623	0.0012884	0.00114014	0.00172192	0.00142965	0.00103043	0.00171091	0.00110955	0.00157571	0.00104871	0.00121364	0.000724758	0.000450963	0.000499728	0.000563345	0.00123185	0.00175572	0.00144424	0.00135885	0.00290028	0.00186424	0.00268038	0.0023513	0.00171529	0.0029598	0.0025797	0.00213849	0.00190784	0.00467696	0.00275199	0.00231745	0.000614856	0.00102684	0.000438415	0.000504657	#DIV/0!	0.00422364	0.00374619	0.00521069	0.00527544	0.00378624	0.00497809	0.00842263	0.00457222	0.00592827	0.00593044	0.00518025	0.00593369
Citric acid	0.263329	0.269018	0.279929	0.288358	0.326369	0.262433	0.449762	0.234664	0.291846	0.370409	0.421786	0.366115	0.389188	0.308505	0.408316	0.34687	0.439894	0.479196	0.449091	0.368435	0.343927	0.299639	0.343837	0.347008	0.614131	0.361434	0.582471	0.525604	0.407915	0.423543	0.539001	0.458032	0.395999	0.444381	0.386819	0.437772	#DIV/0!	0.172011	0.194766	0.259325	0.233469	0.206358	0.221883	0.230617	0.136453	0.259835	0.379019	0.249403	0.289079
Myristic acid	0.00530487	0.00472281	0.00407229	0.00372958	0.00317466	0.00388242	0.0027908	0.00323095	0.00230861	0.0028889	0.00203281	0.00234153	0.00108246	0.00110333	0.0011133	0.00103202	0.00276689	0.00338623	0.00436352	0.00253463	0.0035234	0.00250595	0.0023793	0.00280859	0.00271088	0.00291454	0.00751174	0.00825708	0.00306181	0.00657418	0.00502582	0.00445051	0.00264733	0.00304802	0.00248255	0.00321573	#DIV/0!	0.00198876	0.00241159	0.00323757	0.00273977	0.002005	0.00332317	0.00321233	0.00176865	0.00266395	0.0018218	0.0019774	0.00226876
Quininic acid	0.00587559	0.00751826	0.00360395	0.0130074	0.0119402	0.00228912	0.00485387	0.00755143	0.00780198	0.00454688	0.00390685	0.00148296	0.000707701	0.000434135	0.000356122	0.000468211	0.00310845	0.00148859	0.00176098	0.00314485	0.00510918	0.00274371	0.00380952	0.00575066	0.00772323	0.00578895	0.00904963	0.00898398	0.00842428	0.00788378	0.00674058	0.00819468	0.00234204	0.00382111	0.000690773	0.000634722	#DIV/0!	0.0141896	0.0060723	0.0155766	0.0144185	0.00862545	0.0043212	0.011455	0.0114464	0.00535522	0.00530896	0.00533926	0.00336891
Fructose	0.00593562	0.00584111	0.0123472	0.00337409	0.00639925	0.00221075	0.00293354	0.00385652	0.0031864	0.00931247	0.00574002	0.0114254	0.00487473	0.00532998	0.0051992	0.00388117	0.0102056	0.0110285	0.01433	0.00939802	0.00962847	0.00703696	0.0107884	0.00785496	0.0192003	0.0148401	0.0057956	0.0220038	0.0269261	0.025259	0.04295	0.0155843	0.00601965	0.0104843	0.00214753	0.00777227	#DIV/0!	0.029099	0.0304782	0.0412908	0.0672106	0.0399613	0.0421483	0.0501202	0.0893166	0.0314904	0.0751007	0.0161073	0.0314255
Glucose	0.0031029	0.00405848	0.00457362	0.00343818	0.0033901	0.00433752	0.00452747	0.00354364	0.00186123	0.00407601	0.00409027	0.00201634	0.00435199	0.00294386	0.00428767	0.00456415	0.00279672	0.0110285	0.01433	0.00988076	0.00538811	0.00703696	0.00320116	0.00352856	0.0193206	0.0148494	0.00577002	0.0220391	0.00820053	0.00848913	0.00666893	0.00840926	0.00651207	0.0087172	0.0070932	0.0076036	#DIV/0!	0.00375995	0.00252691	0.00394903	0.0672106	0.0398787	0.0421483	0.0498185	0.0893166	0.0314904	0.0751007	0.00232209	0.0314255
D-Xylose	0.00109587	0.00138888	0.00179056	0.00170541	0.00251929	0.00121397	0.00104023	0.00299992	0.000688216	0.00143765	0.00166056	0.00112619	0.00253497	0.00186354	0.000865094	0.00225218	0.00427374	0.00300039	0.00385869	0.00329532	0.00349399	0.00327617	0.00386889	0.00264767	0.00393156	0.0047695	0.00294363	0.00397284	0.00336189	0.00717817	0.00400869	0.0039867	0.00423899	0.00657314	0.000804393	0.00289418	#DIV/0!	0.00642275	0.00439815	0.00650055	0.00878034	0.00255124	0.00495678	0.00494512	0.00197882	0.00250476	0.00555327	0.00236194	0.0035795
L-Lysine	0.000126433	0.000123456	8.74519e-05	0.000156739	8.52003e-05	0.000107299	0.000138307	0.00023141	0.000446557	0.000296508	0.000133182	0.000111566	0.00013086	7.03309e-05	7.39448e-05	8.88091e-05	9.11202e-05	0.000106284	0.000166477	0.000122435	0.000127684	9.2284e-05	0.000130806	0.000145241	0.000208856	0.00018455	0.00034631	0.000358058	0.000221729	0.000284122	0.000291792	0.000205937	0.000100188	0.000196921	7.47729e-05	9.92545e-05	#DIV/0!	0.000168733	0.000132179	0.000232284	0.000151896	0.000163893	0.000153058	0.000185166	8.24751e-05	0.000222531	0.000146201	0.000128816	0.000153878
Ascorbic acid	0.0169942	0.0227492	0.0221361	0.0205347	0.0273687	0.0304164	0.0143116	0.0442774	0.0215051	0.0259897	0.0287785	0.0257764	0.015807	0.00869221	0.00676031	0.0119793	0.0129305	0.0130886	0.00755793	0.00833491	0.015686	0.00952524	0.0181235	0.0120208	0.00852079	0.0153847	0.011323	0.00687709	0.00844526	0.0115337	0.00563723	0.0068384	0.0158166	0.0230308	0.0126357	0.0137884	#DIV/0!	0.0345522	0.0173829	0.0228181	0.0288692	0.0100367	0.0159123	0.0186454	0.0118908	0.014574	0.0276164	0.0300844	0.0267222
Beta-D-(+)-Talopyranose	0.00204835	0.0024925	0.00253363	0.00268881	0.00400876	0.00192793	0.00168166	0.00385021	0.00128132	0.00249815	0.00282518	0.0019457	0.00444924	0.00310912	0.00146695	0.00369177	0.00709683	0.00513625	0.00598424	0.00552492	0.00507393	0.00452209	0.00580733	0.00384043	0.00665944	0.00686704	0.0051777	0.0073056	0.00562308	0.0110862	0.00774811	0.00737246	0.00708622	0.0103324	0.00153401	0.00468953	#DIV/0!	0.0106985	0.00692219	0.0106335	0.0141169	0.00454672	0.00682979	0.00728063	0.00279937	0.00409995	0.00934938	0.00373593	0.00567678
Palmitic acid	0.518817	0.490159	0.414866	0.381653	0.319286	0.376699	0.293026	0.298138	0.225328	0.280321	0.209773	0.258368	0.104412	0.112364	0.111895	0.101946	0.281958	0.33871	0.429014	0.259563	0.322925	0.252513	0.226612	0.268962	0.268758	0.28712	0.828661	0.92123	0.345743	0.725093	0.552415	0.480315	0.268331	0.31046	0.253368	0.316189	#DIV/0!	0.185705	0.245816	0.316638	0.268631	0.191461	0.307149	0.301852	0.188173	0.253857	0.17774	0.21362	0.234862
Myo-Inositol	0.0196857	0.0226204	0.0227537	0.0211763	0.031279	0.0233608	0.0216388	0.0263739	0.0313784	0.0346723	0.0301191	0.0295333	0.00757072	0.00575981	0.00778757	0.00606265	0.0241765	0.0251152	0.0266854	0.0213569	0.027498	0.0206443	0.0261858	0.0258723	0.0318667	0.0272279	0.0388772	0.0329517	0.0280165	0.0301065	0.0297834	0.0312838	0.0122166	0.0155538	0.0129357	0.014637	#DIV/0!	0.0264587	0.0247267	0.0345887	0.0274716	0.0266362	0.0290095	0.0316109	0.0265522	0.0360657	0.0389469	0.041818	0.0425039
Galactose	0.00117109	0.0012882	0.00193302	0.00128872	0.00192307	0.00173428	0.00207429	0.00154242	0.00173727	0.00177816	0.00126352	0.00182293	0.00130026	0.000948335	0.00138541	0.00100985	0.00156487	0.00178402	0.00222257	0.00146694	0.00212149	0.00168949	0.00220543	0.0020929	0.00258356	0.00226604	0.00314152	0.00253615	0.00202867	0.00266372	0.0024624	0.00221672	0.00147411	0.00214632	0.00197038	0.00221304	#DIV/0!	0.00138792	0.00185927	0.00232984	0.00227026	0.00218904	0.00256159	0.00374609	0.00215783	0.0024308	0.0022479	0.00239908	0.00296233
Phytol	0.00606771	0.00558221	0.00185327	0.00614643	0.0112023	0.0101021	0.0121291	0.00261704	0.00511225	0.00991443	0.0103463	0.0100019	0.00915645	0.00581203	0.00704113	0.00787924	0.0102227	0.00744273	0.0081206	0.0230925	0.0012716	0.0116842	0.0101967	0.0188309	0.00611286	0.00283882	0.00663105	0.00694755	0.0121381	0.0303491	0.022938	0.0215513	0.00335007	0.0232871	0.0147158	0.0136708	#DIV/0!	0.00374104	0.00337174	0.00503222	0.00295607	0.0140361	0.00701676	0.00175007	0.00514839	0.00239237	0.0099068	0.000794115	0.00101081
alpha-Linolenic acid	0.0275899	0.0236215	0.0202561	0.0195742	0.019709	0.028009	0.031547	0.266115	0.0294728	0.0224788	0.0231167	0.0239152	0.0116932	0.0120553	0.0113215	0.011667	0.0190656	0.0190183	0.0215393	0.028436	0.309037	0.0239747	0.016977	0.0255591	0.0183755	0.272471	0.0370279	0.0414865	0.015671	0.0297206	0.0210977	0.0184073	0.0136437	0.0306492	0.0362086	0.0392552	#DIV/0!	0.00882446	0.231816	0.292952	0.0134165	0.0181238	0.278193	0.267856	0.0111033	0.0140031	0.0247361	0.197347	0.216009
Sinapinic acid	0.00447353	0.00424546	0.00487833	0.00385103	0.00787606	0.00841468	0.00628136	0.00694326	0.00504714	0.00671078	0.00590379	0.00561125	0.00120129	0.000898153	0.00126112	0.00109893	0.00813789	0.0113901	0.0122512	0.0077837	0.0170934	0.0106219	0.0144501	0.0120097	0.0134375	0.0150072	0.0146829	0.0138196	0.004459	0.015136	0.00740741	0.00762424	0.00247583	0.00376636	0.00199945	0.00284172	#DIV/0!	0.00249369	0.00307316	0.00364272	0.00456162	0.00412188	0.0088364	0.0130065	0.00567165	0.00474133	0.00433187	0.00724579	0.00679333
Stearic acid	0.240546	0.239622	0.196193	0.182474	0.160958	0.186868	0.146381	0.147785	0.110921	0.135919	0.102378	0.125803	0.0508232	0.0538578	0.0537471	0.04869	0.141725	0.166797	0.217055	0.130287	0.169031	0.127217	0.115253	0.13755	0.133	0.144519	0.430451	0.489855	0.184398	0.393144	0.295116	0.253525	0.13853	0.158991	0.127519	0.160337	#DIV/0!	0.0892633	0.116413	0.152619	0.128767	0.0948354	0.150492	0.147982	0.0872647	0.125167	0.0858143	0.106706	0.116814
Sucrose	0.0370433	0.0360981	0.100502	0.0364297	0.135515	0.0482531	0.0475358	0.0427231	0.0430911	0.120526	0.0430732	0.0628263	0.0363436	0.0226822	0.0420041	0.0243878	0.0568461	0.058119	0.0606902	0.0388916	0.0677133	0.0415347	0.129293	0.0417653	0.114408	0.144386	0.0476338	0.168438	0.0701657	0.0867165	0.0686687	0.0893208	0.0337839	0.0671427	0.0526544	0.0324533	#DIV/0!	0.232863	0.256388	0.354141	0.303591	0.263815	0.306945	0.487509	0.284527	0.228942	0.327034	0.303198	0.342612
3-O-Coumaroyl-D-quinic acid	0.00146492	0.00125584	0.00190442	0.00174045	0.000414425	0.000962239	0.000229985	0.00063743	0.0135522	0.0114757	0.0127668	0.0111381	0.000474113	0.000235518	0.000294577	0.000385793	0.00649918	0.00309527	0.00164531	0.00361356	0.00062674	0.000329688	0.000612765	0.000506829	0.000819582	0.000888804	0.00114465	0.000611078	0.000657247	0.00227964	0.000863232	0.000851802	0.000240609	0.000493954	0.0003375	0.000315313	#DIV/0!	0.00142509	0.00147133	0.00226122	0.00321293	0.000691315	0.000792158	0.00135764	0.00100217	0.0120001	0.00943677	0.0147001	0.0127269
Chlorogenic acid	0.00324487	0.0027553	0.00375246	0.0034737	0.0031459	0.00308426	0.00243863	0.00197349	0.000395456	0.000474986	0.000399283	0.00116185	0.00211368	0.00116416	0.00161431	0.00162393	0.00290693	0.00609464	0.00683175	0.00463445	0.00715555	0.00340398	0.00630608	0.00445881	0.00425054	0.00607905	0.00596469	0.00276891	0.00727302	0.017976	0.00893383	0.0105716	0.00178682	0.00284623	0.00166063	0.00189052	#DIV/0!	0.00346447	0.00348622	0.00452604	0.00364133	0.00240295	0.00422669	0.00624787	0.00109986	0.000333797	0.000390981	0.000428751	0.000418614
Campesterol	0.000233794	8.00069e-05	4.4001e-06	0.000104413	0.000216347	0.000460502	0.000368134	8.96954e-05	0.000536726	0.000315286	0.000250804	0.000288849	0.000112657	0.000116816	9.19049e-05	0.000112376	0.00018606	0.000157186	0.000168098	1.48357e-05	2.21534e-06	0.000365566	0.000242529	0.00061233	0.000113412	1.00813e-05	0.000157059	0.000182375	0.000269895	0.000381808	0.000473072	0.000397745	5.9324e-05	0.000284171	0.000313112	0.000352948	#DIV/0!	8.51275e-05	5.39505e-06	1.14041e-05	2.54677e-06	0.00022509	3.92836e-05	8.37612e-06	3.44975e-05	7.70177e-05	0.000277044	1.90435e-06	9.02508e-06
[truncated: 24 more columns]

## Sheet: Average
	K2		K3		K4		K5		K6		K7		K8		K9		K10
	EN	ED	EN	ED	EN	ED	EN	ED	EN	ED	EN	ED	EN	ED	EN	ED	EN	ED
Valine	0.00296113	0.00705423	0.00333315	0.00654391	0.00420808	0.00571197	0.00241137	0.00359906	0.00299806	0.00680647	0.00254376	0.0054141	0.00541675	0.00643775	0.00599248	0.0106825	0.0027963	0.00473806
Ethanolamine	0.0447091	0.0535687	0.04969	0.0531108	0.0384637	0.0436422	0.0327637	0.0321111	0.0428412	0.0499203	0.0479266	0.0441665	0.0519629	0.0458049	0.0588946	0.0651197	0.0371649	0.037196
Glycerol	0.0732735	0.0769957	0.0684651	0.0806675	0.0760321	0.0921908	0.047113	0.0443955	0.0744269	0.0800417	0.0699387	0.0642101	0.0761941	0.0646015	0.06999	0.0837528	0.0603373	0.0542023
Niacin	0.000180293	0.000316868	0.000313629	0.000296363	0.000752459	0.00101776	0.000480008	0.000476551	0.000549005	0.000449217	0.000240198	0.000296391	0.000213268	0.000239054	0.000583701	0.000353753	0.000777719	0.00083537
L-Isoleucine	0.00122344	0.00408275	0.00141854	0.00468682	0.00225196	0.00396162	0.000839505	0.00179146	0.0016617	0.00626582	0.0015626	0.00403167	0.00239037	0.00370787	0.00217831	0.00585583	0.00111331	0.00182245
L-Proline	0.00436333	0.00787638	0.0052203	0.00689063	0.0047879	0.00643095	0.00557453	0.0103849	0.00441551	0.00768948	0.00415873	0.00689303	0.00691336	0.00772904	0.00697703	0.011027	0.00361102	0.00587071
Maleic acid	0.00731061	0.00916461	0.0100347	0.00641877	0.00507903	0.00649424	0.00616051	0.00800158	0.0071813	0.00776481	0.0113336	0.00595326	0.00679617	0.00959607	0.005448	0.00973397	0.00781469	0.00887837
Glycine	0.00583749	0.0106631	0.0263725	0.0145913	0.00910938	0.00841086	0.00264965	0.0069032	0.00445382	0.0131969	0.0330043	0.00912958	0.00751764	0.00980053	0.00296764	0.0122084	0.00396957	0.00691932
Succinic acid	0.0265104	0.0155148	0.0292861	0.0113383	0.0252763	0.0183868	0.0304384	0.0121718	0.0370213	0.017136	0.0345475	0.0167118	0.0191389	0.00772526	0.0328378	0.0198935	0.0361603	0.0136422
Glyceric acid	0.00686574	0.0206834	0.00643069	0.0357323	0.00730987	0.0296848	0.00150618	0.0176399	0.00277266	0.0318404	0.00811989	0.0339458	0.0104613	0.0209189	0.00340605	0.0355402	0.00671471	0.0201372
Fumaric acid	0.00270398	0.00406689	0.00176775	0.00280865	0.00131378	0.00332141	0.00394942	0.0039179	0.00155817	0.00341123	0.00179006	0.00318712	0.00177331	0.00290294	0.00193223	0.00367068	0.00365506	0.00383181
Serine	0.00795283	0.0308951	0.00930794	0.0368629	0.0161312	0.0272569	0.0109427	0.0292616	0.00793197	0.0527049	0.00627327	0.019603	0.013751	0.0299013	0.0182905	0.0505038	0.00863751	0.0192436
L-Threonine	0.00456235	0.018961	0.00539973	0.0196739	0.00827265	0.0212594	0.00584892	0.021761	0.00473384	0.0283905	0.00408162	0.0190416	0.00739068	0.0201559	0.00679704	0.0232093	0.00360527	0.0162051
L-Aspartic acid	0.000162587	0.000667433	0.000687547	0.000643516	0.000663475	0.00121849	0.00113963	0.00120988	0.000545064	0.00113754	0.00165169	0.0013052	0.0016085	0.00166752	0.00339004	0.00264548	0.00253316	0.00208748
Timonacic	0.0019158	0.0031978	0.00190219	0.00200543	0.00193511	0.00250825	0.00121559	0.00101151	0.00183953	0.00223373	0.00149743	0.00182356	0.00296583	0.00234075	0.00526184	0.00454631	0.00122537	0.0011204
Malic acid	0.0409536	0.500226	0.0429977	0.49604	0.044548	0.46576	0.0481481	0.360523	0.0606367	0.544638	0.118118	0.51195	0.0651166	0.431036	0.0495326	0.529045	0.0386538	0.325398
L-5-Oxoproline	0.0864407	0.0735342	0.0955301	0.0717802	0.0845567	0.0850458	0.0934633	0.0696622	0.0890292	0.100386	0.0896709	0.0830577	0.119053	0.0842739	0.141667	0.132489	0.0966297	0.0808448
L-Cysteine	0.00204036	0.00295197	0.0016642	0.00163847	0.00161562	0.00179708	0.00124099	0.00106685	0.00153554	0.00175044	0.00100029	0.00142348	0.00237088	0.00182165	0.00424561	0.00395762	0.000889767	0.000840564
L-Glutamine	0.000341311	0.00336043	0.000490147	0.00230862	0.000468864	0.002328	0.00025974	0.00184588	0.000319898	0.00385752	0.000121676	0.00339105	0.000672637	0.00211253	0.00321412	0.00517892	7.40223e-05	0.00155106
Shikimic acid	0.00101654	0.00461399	0.00147322	0.0054398	0.00123691	0.00574316	0.000559699	0.000987419	0.00144767	0.00491264	0.00244905	0.00620287	0.00234832	0.00530335	0.00291356	0.00721808	0.000646192	0.00103921
Citric acid	0.275158	0.214893	0.318307	0.198828	0.362539	0.294334	0.36322	0.174157	0.434154	0.392804	0.333603	0.216394	0.52091	0.25471	0.457123	0.323627	0.416243	0.315153
Myristic acid	0.00445739	0.00259442	0.00326971	0.00257729	0.00239296	0.00218298	0.00108278	0.000699665	0.00326282	0.00227853	0.00280431	0.00158213	0.00534856	0.00425909	0.00477808	0.00278423	0.00284841	0.0015055
Quininic acid	0.00750131	0.0125643	0.00665865	0.00896199	0.00443467	0.00484309	0.000491542	0.000600955	0.00237572	0.00452571	0.00435327	0.00596203	0.00788645	0.00500571	0.00781083	0.0067964	0.00187216	0.00155832
Fructose	0.00687451	0.0420196	0.00385001	0.0553866	0.00741608	0.038531	0.00482127	0.00422798	0.0112405	0.0456401	0.0088272	0.0122975	0.01546	0.0164604	0.0276798	0.0658888	0.00660593	0.0118277
Glucose	0.0037933	0.0193616	0.00394968	0.0552905	0.00301096	0.0350847	0.00403692	0.00407979	0.00950898	0.0456805	0.0047887	0.0030594	0.0154948	0.0053648	0.00794196	0.00763708	0.00748152	0.00618047
D-Xylose	0.00149518	0.00652545	0.00194335	0.00360799	0.00122815	0.00349987	0.00187895	0.000660404	0.00360703	0.00453336	0.00332168	0.00208348	0.00390438	0.00187795	0.00463386	0.00794168	0.00362767	0.00167506
L-Lysine	0.00012352	0.000171273	0.000140554	0.000146148	0.000246953	0.000162857	9.09862e-05	9.90819e-05	0.000121579	0.000146061	0.000124004	0.000154413	0.000274443	0.000201958	0.000250895	0.000226738	0.000117784	0.000150015
Ascorbic acid	0.0206036	0.0259056	0.0290935	0.0141213	0.0255124	0.0247493	0.0108097	0.00509455	0.010478	0.0150206	0.0138389	0.00797703	0.0105264	0.00761205	0.00811366	0.011024	0.0163179	0.0065955
Beta-D-(+)-Talopyranose	0.00244082	0.0105928	0.00286714	0.00536413	0.00213758	0.00571551	0.00317927	0.00108459	0.00593556	0.00769274	0.00481094	0.00343897	0.00650245	0.00294349	0.00795746	0.0132652	0.00591053	0.00288944
Palmitic acid	0.451374	0.254198	0.321787	0.247159	0.243448	0.22002	0.107654	0.0743083	0.327311	0.224177	0.267753	0.146649	0.576442	0.459809	0.525891	0.289256	0.287087	0.155425
Myo-Inositol	0.021559	0.0283114	0.0256631	0.0284522	0.0314258	0.0398336	0.00679519	0.00554932	0.0243335	0.0327574	0.0250501	0.0262072	0.0327309	0.0304759	0.0297976	0.0329627	0.0138358	0.0125105
Galactose	0.00142026	0.00196182	0.00181851	0.00266364	0.00165047	0.00251003	0.00116097	0.00126354	0.0017596	0.00258171	0.00202733	0.00229185	0.00263182	0.00315996	0.00234288	0.00297181	0.00195096	0.00267361
Phytol	0.0049124	0.00377527	0.00901265	0.00698784	0.00884371	0.00352603	0.00747221	0.00339374	0.0122197	0.0106177	0.0104958	0.00472144	0.00563257	0.00828333	0.0217441	0.0187253	0.0137559	0.0103
alpha-Linolenic acid	0.0227604	0.136752	0.086345	0.143819	0.0247459	0.113024	0.0116843	0.0444521	0.0220148	0.0167981	0.0938871	0.0441863	0.0923401	0.0969536	0.0212241	0.0831544	0.0299392	0.0183654
Sinapinic acid	0.00436209	0.0034428	0.00737884	0.00790911	0.00581824	0.00577808	0.00111487	0.000837519	0.00989071	0.00791703	0.0135438	0.00738465	0.0142368	0.00672894	0.00865666	0.00971254	0.00277084	0.00188784
Stearic acid	0.214709	0.121766	0.160498	0.120144	0.118756	0.108625	0.0517795	0.035612	0.163966	0.111761	0.137263	0.0736727	0.299456	0.240352	0.281546	0.15221	0.146344	0.0783785
Sucrose	0.0525182	0.286746	0.0685067	0.335699	0.0673791	0.300447	0.0313544	0.144561	0.0536367	0.362457	0.0700765	0.351388	0.118716	0.408779	0.0787179	0.471246	0.0465086	0.251337
3-O-Coumaroyl-D-quinic acid	0.00159141	0.00209264	0.00056102	0.000960821	0.0122332	0.012216	0.0003475	0.000239741	0.00371333	0.00201267	0.000519005	0.00037839	0.000866029	0.000776579	0.00116298	0.0012629	0.000346844	0.000301409
Chlorogenic acid	0.00330658	0.00377951	0.00266057	0.00349434	0.000607894	0.000393036	0.00162902	0.00110577	0.00511694	0.00535294	0.00533111	0.00370897	0.0047658	0.00427309	0.0111886	0.0102544	0.00204605	0.00183224
Campesterol	0.000105654	2.61184e-05	0.00028367	7.68117e-05	0.000347916	9.12479e-05	0.000108438	1.446e-05	0.000131545	0.00011336	0.00030566	7.22571e-05	0.000115732	0.000208993	0.00038063	0.000249772	0.000252389	0.00016965

## Sheet: Log2FC
	K2		K2		K3		K3		K4		K4		K5		K5		K6		K6		K7		K7		K8		K8		K9		K9		K10		K10
	EN	ED	FC	Log	EN	ED	FC	Log	EN	ED	FC	Log	EN	ED	FC	Log	EN	ED	FC	Log	EN	ED	FC	Log	EN	ED	FC	Log	EN	ED	FC	Log	EN	ED	FC	Log
Valine	0.00296113	0.00705423	2.38228	1.25234	0.00333315	0.00654391	1.96328	0.973267	0.00420808	0.00571197	1.35738	0.440824	0.00241137	0.00359906	1.49254	0.577765	0.00299806	0.00680647	2.27029	1.18288	0.00254376	0.0054141	2.12839	1.08976	0.00541675	0.00643775	1.18849	0.249128	0.00599248	0.0106825	1.78266	0.834031	0.0027963	0.00473806	1.6944	0.760777
Ethanolamine	0.0447091	0.0535687	1.19816	0.260821	0.04969	0.0531108	1.06884	0.0960486	0.0384637	0.0436422	1.13463	0.182224	0.0327637	0.0321111	0.980081	-0.0290276	0.0428412	0.0499203	1.16524	0.220629	0.0479266	0.0441665	0.921545	-0.117873	0.0519629	0.0458049	0.881493	-0.181978	0.0588946	0.0651197	1.1057	0.144959	0.0371649	0.037196	1.00084	0.00120532
Glycerol	0.0732735	0.0769957	1.0508	0.0714855	0.0684651	0.0806675	1.17823	0.23662	0.0760321	0.0921908	1.21252	0.278013	0.047113	0.0443955	0.94232	-0.0857106	0.0744269	0.0800417	1.07544	0.104928	0.0699387	0.0642101	0.918091	-0.123291	0.0761941	0.0646015	0.847854	-0.238111	0.06999	0.0837528	1.19664	0.258989	0.0603373	0.0542023	0.898322	-0.154696
Niacin	0.000180293	0.000316868	1.75752	0.813537	0.000313629	0.000296363	0.944946	-0.0816955	0.000752459	0.00101776	1.35258	0.435716	0.000480008	0.000476551	0.992799	-0.0104265	0.000549005	0.000449217	0.818239	-0.289406	0.000240198	0.000296391	1.23394	0.303273	0.000213268	0.000239054	1.12091	0.164668	0.000583701	0.000353753	0.606052	-0.722487	0.000777719	0.00083537	1.07413	0.103166
L-Isoleucine	0.00122344	0.00408275	3.33711	1.7386	0.00141854	0.00468682	3.30398	1.7242	0.00225196	0.00396162	1.75919	0.814913	0.000839505	0.00179146	2.13394	1.09352	0.0016617	0.00626582	3.77073	1.91484	0.0015626	0.00403167	2.5801	1.36743	0.00239037	0.00370787	1.55117	0.633353	0.00217831	0.00585583	2.68825	1.42667	0.00111331	0.00182245	1.63696	0.71102
L-Proline	0.00436333	0.00787638	1.80513	0.852105	0.0052203	0.00689063	1.31997	0.400503	0.0047879	0.00643095	1.34317	0.425638	0.00557453	0.0103849	1.86292	0.897564	0.00441551	0.00768948	1.74147	0.800305	0.00415873	0.00689303	1.65749	0.728996	0.00691336	0.00772904	1.11798	0.160901	0.00697703	0.011027	1.58047	0.660349	0.00361102	0.00587071	1.62578	0.701129
Maleic acid	0.00731061	0.00916461	1.2536	0.326082	0.0100347	0.00641877	0.639655	-0.644634	0.00507903	0.00649424	1.27864	0.354608	0.00616051	0.00800158	1.29885	0.377236	0.0071813	0.00776481	1.08125	0.112704	0.0113336	0.00595326	0.525277	-0.928849	0.00679617	0.00959607	1.41198	0.497721	0.005448	0.00973397	1.78671	0.837303	0.00781469	0.00887837	1.13611	0.184107
Glycine	0.00583749	0.0106631	1.82665	0.869203	0.0263725	0.0145913	0.553278	-0.853924	0.00910938	0.00841086	0.923318	-0.1151	0.00264965	0.0069032	2.60532	1.38146	0.00445382	0.0131969	2.96306	1.56709	0.0330043	0.00912958	0.276618	-1.85403	0.00751764	0.00980053	1.30367	0.382581	0.00296764	0.0122084	4.11384	2.04049	0.00396957	0.00691932	1.74309	0.801646
Succinic acid	0.0265104	0.0155148	0.585234	-0.772914	0.0292861	0.0113383	0.387157	-1.36901	0.0252763	0.0183868	0.727434	-0.459112	0.0304384	0.0121718	0.399882	-1.32235	0.0370213	0.017136	0.462868	-1.11133	0.0345475	0.0167118	0.483733	-1.04772	0.0191389	0.00772526	0.403641	-1.30885	0.0328378	0.0198935	0.60581	-0.723062	0.0361603	0.0136422	0.377269	-1.40634
Glyceric acid	0.00686574	0.0206834	3.01255	1.59099	0.00643069	0.0357323	5.55653	2.47418	0.00730987	0.0296848	4.06092	2.02181	0.00150618	0.0176399	11.7117	3.54988	0.00277266	0.0318404	11.4837	3.52151	0.00811989	0.0339458	4.18058	2.0637	0.0104613	0.0209189	1.99965	0.999748	0.00340605	0.0355402	10.4344	3.38328	0.00671471	0.0201372	2.99896	1.58446
Fumaric acid	0.00270398	0.00406689	1.50404	0.588845	0.00176775	0.00280865	1.58883	0.667963	0.00131378	0.00332141	2.52813	1.33807	0.00394942	0.0039179	0.99202	-0.0115583	0.00155817	0.00341123	2.18926	1.13045	0.00179006	0.00318712	1.78046	0.832247	0.00177331	0.00290294	1.63702	0.711073	0.00193223	0.00367068	1.89971	0.925778	0.00365506	0.00383181	1.04836	0.0681316
Serine	0.00795283	0.0308951	3.88479	1.95784	0.00930794	0.0368629	3.96037	1.98563	0.0161312	0.0272569	1.6897	0.756767	0.0109427	0.0292616	2.67408	1.41904	0.00793197	0.0527049	6.64462	2.73219	0.00627327	0.019603	3.12485	1.64379	0.013751	0.0299013	2.17448	1.12067	0.0182905	0.0505038	2.76121	1.4653	0.00863751	0.0192436	2.22792	1.1557
L-Threonine	0.00456235	0.018961	4.15597	2.05518	0.00539973	0.0196739	3.6435	1.86533	0.00827265	0.0212594	2.56984	1.36168	0.00584892	0.021761	3.72051	1.8955	0.00473384	0.0283905	5.99735	2.58433	0.00408162	0.0190416	4.66521	2.22194	0.00739068	0.0201559	2.7272	1.44742	0.00679704	0.0232093	3.41461	1.77172	0.00360527	0.0162051	4.49484	2.16827
L-Aspartic acid	0.000162587	0.000667433	4.10508	2.03741	0.000687547	0.000643516	0.93596	-0.0954813	0.000663475	0.00121849	1.83653	0.876983	0.00113963	0.00120988	1.06164	0.0862915	0.000545064	0.00113754	2.08699	1.06142	0.00165169	0.0013052	0.790218	-0.339677	0.0016085	0.00166752	1.03669	0.0519883	0.00339004	0.00264548	0.780367	-0.357775	0.00253316	0.00208748	0.824065	-0.27917
Timonacic	0.0019158	0.0031978	1.66917	0.739132	0.00190219	0.00200543	1.05428	0.0762541	0.00193511	0.00250825	1.29618	0.374262	0.00121559	0.00101151	0.832119	-0.265138	0.00183953	0.00223373	1.2143	0.280119	0.00149743	0.00182356	1.21779	0.284263	0.00296583	0.00234075	0.789237	-0.341469	0.00526184	0.00454631	0.864015	-0.210872	0.00122537	0.0011204	0.914341	-0.129196
Malic acid	0.0409536	0.500226	12.2145	3.61052	0.0429977	0.49604	11.5365	3.52813	0.044548	0.46576	10.4552	3.38615	0.0481481	0.360523	7.4878	2.90454	0.0606367	0.544638	8.98199	3.16704	0.118118	0.51195	4.33423	2.11577	0.0651166	0.431036	6.61944	2.72671	0.0495326	0.529045	10.6807	3.41694	0.0386538	0.325398	8.41828	3.07352
L-5-Oxoproline	0.0864407	0.0735342	0.850689	-0.233297	0.0955301	0.0717802	0.751388	-0.41237	0.0845567	0.0850458	1.00578	0.0083194	0.0934633	0.0696622	0.745343	-0.424024	0.0890292	0.100386	1.12757	0.173212	0.0896709	0.0830577	0.926251	-0.110525	0.119053	0.0842739	0.707871	-0.498442	0.141667	0.132489	0.935213	-0.0966337	0.0966297	0.0808448	0.836645	-0.257312
L-Cysteine	0.00204036	0.00295197	1.44679	0.532851	0.0016642	0.00163847	0.984538	-0.0224806	0.00161562	0.00179708	1.11231	0.153565	0.00124099	0.00106685	0.859676	-0.218136	0.00153554	0.00175044	1.13995	0.188968	0.00100029	0.00142348	1.42307	0.50901	0.00237088	0.00182165	0.768342	-0.38018	0.00424561	0.00395762	0.932168	-0.101338	0.000889767	0.000840564	0.944702	-0.0820691
L-Glutamine	0.000341311	0.00336043	9.84567	3.29949	0.000490147	0.00230862	4.71005	2.23574	0.000468864	0.002328	4.9652	2.31185	0.00025974	0.00184588	7.10664	2.82917	0.000319898	0.00385752	12.0586	3.59199	0.000121676	0.00339105	27.8695	4.80062	0.000672637	0.00211253	3.14067	1.65107	0.00321412	0.00517892	1.6113	0.688226	7.40223e-05	0.00155106	20.954	4.38916
Shikimic acid	0.00101654	0.00461399	4.53894	2.18235	0.00147322	0.0054398	3.69244	1.88458	0.00123691	0.00574316	4.64317	2.21511	0.000559699	0.000987419	1.7642	0.819012	0.00144767	0.00491264	3.39349	1.76277	0.00244905	0.00620287	2.53276	1.34071	0.00234832	0.00530335	2.25836	1.17527	0.00291356	0.00721808	2.47741	1.30883	0.000646192	0.00103921	1.6082	0.685446
Citric acid	0.275158	0.214893	0.780979	-0.356645	0.318307	0.198828	0.62464	-0.678902	0.362539	0.294334	0.811869	-0.300682	0.36322	0.174157	0.479482	-1.06045	0.434154	0.392804	0.904757	-0.144398	0.333603	0.216394	0.648658	-0.624471	0.52091	0.25471	0.488971	-1.03218	0.457123	0.323627	0.707964	-0.498251	0.416243	0.315153	0.757139	-0.40137
Myristic acid	0.00445739	0.00259442	0.582051	-0.780784	0.00326971	0.00257729	0.788232	-0.343308	0.00239296	0.00218298	0.912248	-0.132502	0.00108278	0.000699665	0.646175	-0.630004	0.00326282	0.00227853	0.698333	-0.518012	0.00280431	0.00158213	0.564178	-0.825777	0.00534856	0.00425909	0.796306	-0.328606	0.00477808	0.00278423	0.582708	-0.779155	0.00284841	0.0015055	0.528542	-0.919909
Quininic acid	0.00750131	0.0125643	1.67495	0.744114	0.00665865	0.00896199	1.34592	0.42859	0.00443467	0.00484309	1.0921	0.127102	0.000491542	0.000600955	1.22259	0.289942	0.00237572	0.00452571	1.90499	0.929781	0.00435327	0.00596203	1.36955	0.453706	0.00788645	0.00500571	0.634723	-0.6558	0.00781083	0.0067964	0.870125	-0.200705	0.00187216	0.00155832	0.832367	-0.264709
Fructose	0.00687451	0.0420196	6.11238	2.61173	0.00385001	0.0553866	14.3861	3.8466	0.00741608	0.038531	5.1956	2.37729	0.00482127	0.00422798	0.876942	-0.189446	0.0112405	0.0456401	4.06032	2.02159	0.0088272	0.0122975	1.39314	0.478337	0.01546	0.0164604	1.06471	0.0904587	0.0276798	0.0658888	2.38039	1.2512	0.00660593	0.0118277	1.79047	0.840336
Glucose	0.0037933	0.0193616	5.10417	2.35168	0.00394968	0.0552905	13.9987	3.80722	0.00301096	0.0350847	11.6523	3.54254	0.00403692	0.00407979	1.01062	0.0152414	0.00950898	0.0456805	4.80393	2.26421	0.0047887	0.0030594	0.63888	-0.646383	0.0154948	0.0053648	0.346232	-1.53019	0.00794196	0.00763708	0.961612	-0.0564739	0.00748152	0.00618047	0.826098	-0.275615
D-Xylose	0.00149518	0.00652545	4.36432	2.12576	0.00194335	0.00360799	1.85658	0.892648	0.00122815	0.00349987	2.8497	1.51081	0.00187895	0.000660404	0.351476	-1.5085	0.00360703	0.00453336	1.25681	0.329769	0.00332168	0.00208348	0.627236	-0.672919	0.00390438	0.00187795	0.480986	-1.05593	0.00463386	0.00794168	1.71384	0.777229	0.00362767	0.00167506	0.461744	-1.11483
L-Lysine	0.00012352	0.000171273	1.3866	0.471553	0.000140554	0.000146148	1.0398	0.0563014	0.000246953	0.000162857	0.659462	-0.600638	9.09862e-05	9.90819e-05	1.08898	0.122975	0.000121579	0.000146061	1.20136	0.264674	0.000124004	0.000154413	1.24523	0.316414	0.000274443	0.000201958	0.735883	-0.442451	0.000250895	0.000226738	0.903716	-0.146058	0.000117784	0.000150015	1.27364	0.348959
Ascorbic acid	0.0206036	0.0259056	1.25734	0.33037	0.0290935	0.0141213	0.485376	-1.04282	0.0255124	0.0247493	0.970087	-0.0438144	0.0108097	0.00509455	0.471294	-1.0853	0.010478	0.0150206	1.43354	0.51958	0.0138389	0.00797703	0.576421	-0.794804	0.0105264	0.00761205	0.723138	-0.467657	0.00811366	0.011024	1.35869	0.442219	0.0163179	0.0065955	0.404189	-1.3069
Beta-D-(+)-Talopyranose	0.00244082	0.0105928	4.33984	2.11764	0.00286714	0.00536413	1.8709	0.903732	0.00213758	0.00571551	2.67382	1.4189	0.00317927	0.00108459	0.341143	-1.55155	0.00593556	0.00769274	1.29604	0.374115	0.00481094	0.00343897	0.714822	-0.484344	0.00650245	0.00294349	0.452674	-1.14345	0.00795746	0.0132652	1.66702	0.737268	0.00591053	0.00288944	0.488862	-1.0325
Palmitic acid	0.451374	0.254198	0.563164	-0.828372	0.321787	0.247159	0.768081	-0.380669	0.243448	0.22002	0.903767	-0.145978	0.107654	0.0743083	0.69025	-0.534808	0.327311	0.224177	0.684906	-0.546022	0.267753	0.146649	0.547704	-0.868532	0.576442	0.459809	0.797667	-0.326142	0.525891	0.289256	0.55003	-0.862417	0.287087	0.155425	0.541388	-0.885265
Myo-Inositol	0.021559	0.0283114	1.3132	0.393091	0.0256631	0.0284522	1.10868	0.148843	0.0314258	0.0398336	1.26755	0.342039	0.00679519	0.00554932	0.816654	-0.292204	0.0243335	0.0327574	1.34618	0.428875	0.0250501	0.0262072	1.04619	0.0651455	0.0327309	0.0304759	0.931107	-0.102981	0.0297976	0.0329627	1.10622	0.145641	0.0138358	0.0125105	0.904209	-0.145272
Galactose	0.00142026	0.00196182	1.38132	0.466044	0.00181851	0.00266364	1.46473	0.550638	0.00165047	0.00251003	1.5208	0.604829	0.00116097	0.00126354	1.08835	0.122145	0.0017596	0.00258171	1.46721	0.553077	0.00202733	0.00229185	1.13048	0.176935	0.00263182	0.00315996	1.20068	0.263848	0.00234288	0.00297181	1.26845	0.343062	0.00195096	0.00267361	1.3704	0.4546
Phytol	0.0049124	0.00377527	0.768518	-0.37985	0.00901265	0.00698784	0.775336	-0.367106	0.00884371	0.00352603	0.398704	-1.32661	0.00747221	0.00339374	0.454182	-1.13866	0.0122197	0.0106177	0.868902	-0.202734	0.0104958	0.00472144	0.449839	-1.15252	0.00563257	0.00828333	1.47061	0.556418	0.0217441	0.0187253	0.861166	-0.215637	0.0137559	0.0103	0.748766	-0.417412
alpha-Linolenic acid	0.0227604	0.136752	6.00834	2.58697	0.086345	0.143819	1.66563	0.736069	0.0247459	0.113024	4.56738	2.19137	0.0116843	0.0444521	3.80444	1.92768	0.0220148	0.0167981	0.763035	-0.390179	0.0938871	0.0441863	0.470632	-1.08733	0.0923401	0.0969536	1.04996	0.0703366	0.0212241	0.0831544	3.91792	1.97009	0.0299392	0.0183654	0.613423	-0.705046
Sinapinic acid	0.00436209	0.0034428	0.789255	-0.341438	0.00737884	0.00790911	1.07186	0.100122	0.00581824	0.00577808	0.993098	-0.00999245	0.00111487	0.000837519	0.751224	-0.412686	0.00989071	0.00791703	0.800451	-0.321116	0.0135438	0.00738465	0.545242	-0.875032	0.0142368	0.00672894	0.472644	-1.08117	0.00865666	0.00971254	1.12197	0.166038	0.00277084	0.00188784	0.681324	-0.553588
Stearic acid	0.214709	0.121766	0.56712	-0.818274	0.160498	0.120144	0.748567	-0.417796	0.118756	0.108625	0.914698	-0.128633	0.0517795	0.035612	0.687762	-0.540018	0.163966	0.111761	0.681608	-0.552985	0.137263	0.0736727	0.536728	-0.897738	0.299456	0.240352	0.80263	-0.317194	0.281546	0.15221	0.540623	-0.887305	0.146344	0.0783785	0.535577	-0.900834
Sucrose	0.0525182	0.286746	5.45993	2.44888	0.0685067	0.335699	4.90024	2.29285	0.0673791	0.300447	4.45905	2.15674	0.0313544	0.144561	4.61054	2.20494	0.0536367	0.362457	6.75763	2.75652	0.0700765	0.351388	5.01434	2.32606	0.118716	0.408779	3.44332	1.7838	0.0787179	0.471246	5.98652	2.58172	0.0465086	0.251337	5.40409	2.43405
3-O-Coumaroyl-D-quinic acid	0.00159141	0.00209264	1.31496	0.395022	0.00056102	0.000960821	1.71263	0.776216	0.0122332	0.012216	0.998594	-0.00203005	0.0003475	0.000239741	0.689901	-0.535538	0.00371333	0.00201267	0.542011	-0.883605	0.000519005	0.00037839	0.729067	-0.455878	0.000866029	0.000776579	0.896712	-0.157283	0.00116298	0.0012629	1.08592	0.118919	0.000346844	0.000301409	0.869004	-0.202566
Chlorogenic acid	0.00330658	0.00377951	1.14303	0.192861	0.00266057	0.00349434	1.31338	0.393286	0.000607894	0.000393036	0.646554	-0.629158	0.00162902	0.00110577	0.678797	-0.558947	0.00511694	0.00535294	1.04612	0.0650495	0.00533111	0.00370897	0.695722	-0.523417	0.0047658	0.00427309	0.896616	-0.157437	0.0111886	0.0102544	0.916503	-0.125789	0.00204605	0.00183224	0.895501	-0.159233
Campesterol	0.000105654	2.61184e-05	0.247208	-2.01621	0.00028367	7.68117e-05	0.270779	-1.88481	0.000347916	9.12479e-05	0.262269	-1.93088	0.000108438	1.446e-05	0.133348	-2.90673	0.000131545	0.00011336	0.861757	-0.214647	0.00030566	7.22571e-05	0.236397	-2.08072	0.000115732	0.000208993	1.80583	0.852666	0.00038063	0.000249772	0.656208	-0.607775	0.000252389	0.00016965	0.672176	-0.57309

## Sheet: Log2FC Summarized
	K2	K3	K7	K8	K9	K4	K6	K5	K10
	Winterbor	Dwarf Curled Scotch	Darkibor	Starbor	Scarlet	Lacinato	Rainbow Lacinato	Red Russian	Red Ursa
Valine	1.25234	0.973267	1.08976	0.249128	0.834031	0.440824	1.18288	0.577765	0.760777
Ethanolamine	0.260821	0.0960486	-0.117873	-0.181978	0.144959	0.182224	0.220629	-0.0290276	0.00120532
Glycerol	0.0714855	0.23662	-0.123291	-0.238111	0.258989	0.278013	0.104928	-0.0857106	-0.154696
Niacin	0.813537	-0.0816955	0.303273	0.164668	-0.722487	0.435716	-0.289406	-0.0104265	0.103166
L-Isoleucine	1.7386	1.7242	1.36743	0.633353	1.42667	0.814913	1.91484	1.09352	0.71102
L-Proline	0.852105	0.400503	0.728996	0.160901	0.660349	0.425638	0.800305	0.897564	0.701129
Maleic acid	0.326082	-0.644634	-0.928849	0.497721	0.837303	0.354608	0.112704	0.377236	0.184107
Glycine	0.869203	-0.853924	-1.85403	0.382581	2.04049	-0.1151	1.56709	1.38146	0.801646
Succinic acid	-0.772914	-1.36901	-1.04772	-1.30885	-0.723062	-0.459112	-1.11133	-1.32235	-1.40634
Glyceric acid	1.59099	2.47418	2.0637	0.999748	3.38328	2.02181	3.52151	3.54988	1.58446
Fumaric acid	0.588845	0.667963	0.832247	0.711073	0.925778	1.33807	1.13045	-0.0115583	0.0681316
Serine	1.95784	1.98563	1.64379	1.12067	1.4653	0.756767	2.73219	1.41904	1.1557
L-Threonine	2.05518	1.86533	2.22194	1.44742	1.77172	1.36168	2.58433	1.8955	2.16827
L-Aspartic acid	2.03741	-0.0954813	-0.339677	0.0519883	-0.357775	0.876983	1.06142	0.0862915	-0.27917
Timonacic	0.739132	0.0762541	0.284263	-0.341469	-0.210872	0.374262	0.280119	-0.265138	-0.129196
Malic acid	3.61052	3.52813	2.11577	2.72671	3.41694	3.38615	3.16704	2.90454	3.07352
L-5-Oxoproline	-0.233297	-0.41237	-0.110525	-0.498442	-0.0966337	0.0083194	0.173212	-0.424024	-0.257312
L-Cysteine	0.532851	-0.0224806	0.50901	-0.38018	-0.101338	0.153565	0.188968	-0.218136	-0.0820691
L-Glutamine	3.29949	2.23574	4.80062	1.65107	0.688226	2.31185	3.59199	2.82917	4.38916
Shikimic acid	2.18235	1.88458	1.34071	1.17527	1.30883	2.21511	1.76277	0.819012	0.685446
Citric acid	-0.356645	-0.678902	-0.624471	-1.03218	-0.498251	-0.300682	-0.144398	-1.06045	-0.40137
D-Fructose	2.61173	3.8466	0.478337	0.0904587	1.2512	2.37729	2.02159	-0.189446	0.840336
D-Glucose	2.35168	3.80722	-0.646383	-1.53019	-0.0564739	3.54254	2.26421	0.0152414	-0.275615
d-Galactose	0.466044	0.550638	0.176935	0.263848	0.343062	0.604829	0.553077	0.122145	0.4546
Myristic acid	-0.780784	-0.343308	-0.825777	-0.328606	-0.779155	-0.132502	-0.518012	-0.630004	-0.919909
Quininic acid	0.744114	0.42859	0.453706	-0.6558	-0.200705	0.127102	0.929781	0.289942	-0.264709
D-Xylose	2.12576	0.892648	-0.672919	-1.05593	0.777229	1.51081	0.329769	-1.5085	-1.11483
L-Lysine	0.471553	0.0563014	0.316414	-0.442451	-0.146058	-0.600638	0.264674	0.122975	0.348959
Ascorbic acid	0.33037	-1.04282	-0.794804	-0.467657	0.442219	-0.0438144	0.51958	-1.0853	-1.3069
Beta-D-(+)-Talopyranose	2.11764	0.903732	-0.484344	-1.14345	0.737268	1.4189	0.374115	-1.55155	-1.0325
Palmitic acid	-0.828372	-0.380669	-0.868532	-0.326142	-0.862417	-0.145978	-0.546022	-0.534808	-0.885265
Myo-Inositol	0.393091	0.148843	0.0651455	-0.102981	0.145641	0.342039	0.428875	-0.292204	-0.145272
Phytol	-0.37985	-0.367106	-1.15252	0.556418	-0.215637	-1.32661	-0.202734	-1.13866	-0.417412
alpha-Linolenic acid	2.58697	0.736069	-1.08733	0.0703366	1.97009	2.19137	-0.390179	1.92768	-0.705046
Sinapinic acid	-0.341438	0.100122	-0.875032	-1.08117	0.166038	-0.00999245	-0.321116	-0.412686	-0.553588
Stearic acid	-0.818274	-0.417796	-0.897738	-0.317194	-0.887305	-0.128633	-0.552985	-0.540018	-0.900834
Sucrose	2.44888	2.29285	2.32606	1.7838	2.58172	2.15674	2.75652	2.20494	2.43405
3-O-Coumaroyl-D-quinic acid	0.395022	0.776216	-0.455878	-0.157283	0.118919	-0.00203005	-0.883605	-0.535538	-0.202566
Chlorogenic acid	0.192861	0.393286	-0.523417	-0.157437	-0.125789	-0.629158	0.0650495	-0.558947	-0.159233
Campesterol	-2.01621	-1.88481	-2.08072	0.852666	-0.607775	-1.93088	-0.214647	-2.90673	-0.57309
