# Supplementary material for: Systems-level proteomics and metabolomics reveals the diel molecular landscape of diverse kale cultivars
Source: Front Plant Sci. 2023 Jul 28;14:1170448. doi: 10.3389/fpls.2023.1170448 (PMC10421703; doi:10.3389/fpls.2023.1170448)
Supplement: Supplemental Data Sheet 2 — Liquid chromatography proteomic data. [file Table_2.xlsx]

## Sheet: Readme
All_Quantified	All quantified proteins in the study (n=4; e.g. K10-1-0; K# = cultivar 2-10, 1-4 = biological replicate 1-4, 0/12 = ZT0 (EN)/ ZT12 (ED)
Sig_Candidates	All significantly changing proteins (Bonferonni corrected p-value ≤ 0.05 and Log2FC ≥ 0.58)
K2_ENvED	All significantly changing proteins in K2 (Winterbor)
K3_ENvED	All significantly changing proteins in K3 (Dwarf Curled Scotch)
K4_ENvED	All significantly changing proteins in K4 (Lacinato)
K5_ENvED	All significantly changing proteins in K5 (Red Russian)
K6_ENvED	All significantly changing proteins in K6 (Rainbow Lacinato)
K7_ENvED	All significantly changing proteins in K7 (Darkibor)
K8_ENvED	All significantly changing proteins in K8 (Starbor)
K9_ENvED	All significantly changing proteins in K9 (Scarlet)
K10_ENvED	All significantly changing proteins in K10 (Red Ursa)
Sig_Candidate_Summary	All significantly changing proteins fluctuating up or down in abundance in each cultivar
Sig_Candidate_grp1	All significantly changing proteins in Group I cultivars
Sig_Candidate_grp2	All significantly changing proteins in Group II cultivars

## Sheet: All_Quantified
PG.ProteinGroups	K10-1-0.raw.PG.Quantity	K10-2-0.raw.PG.Quantity	K10-3-0.raw.PG.Quantity	K10-4-0.raw.PG.Quantity	K10-1-12.raw.PG.Quantity	K10-2-12.raw.PG.Quantity	K10-3-12.raw.PG.Quantity	K10-4-12.raw.PG.Quantity	K9-1-0.raw.PG.Quantity	K9-2-0.raw.PG.Quantity	K9-3-0.raw.PG.Quantity	K9-4-0.raw.PG.Quantity	K9-1-12.raw.PG.Quantity	K9-2-12.raw.PG.Quantity	K9-3-12.raw.PG.Quantity	K9-4-12.raw.PG.Quantity	K8-1-0.raw.PG.Quantity	K8-2-0.raw.PG.Quantity	K8-3-0.raw.PG.Quantity	K8-4-0.raw.PG.Quantity	K8-1-12.raw.PG.Quantity	K8-2-12.raw.PG.Quantity	K8-3-12.raw.PG.Quantity	K8-4-12.raw.PG.Quantity	K7-1-0.raw.PG.Quantity	K7-2-0.raw.PG.Quantity	K7-3-0.raw.PG.Quantity	K7-4-0.raw.PG.Quantity	K7-1-12.raw.PG.Quantity	K7-2-12.raw.PG.Quantity	K7-3-12.raw.PG.Quantity	K7-4-12.raw.PG.Quantity	K6-1-0.raw.PG.Quantity	K6-2-0.raw.PG.Quantity	K6-3-0.raw.PG.Quantity	K6-4-0.raw.PG.Quantity	K6-1-12.raw.PG.Quantity	K6-2-12.raw.PG.Quantity	K6-3-12.raw.PG.Quantity	K6-4-12.raw.PG.Quantity	K5-1-0.raw.PG.Quantity	K5-2-0.raw.PG.Quantity	K5-3-0.raw.PG.Quantity	K5-4-0.raw.PG.Quantity	K5-1-12.raw.PG.Quantity	K5-2-12.raw.PG.Quantity	K5-3-12.raw.PG.Quantity	K5-4-12.raw.PG.Quantity	K4-1-0.raw.PG.Quantity
A0A0D2ZPD6	248480	185194	80174.7	212677	1	198523	76082.9	167757	732319	3242.57	492.435	10024.1	3218.43	Filtered	24240.3	1368.35	1138.6	17444.4	4306.45	778.547	5809.31	357.749	18.1752	Filtered	43292.3	36850.1	37295.7	33637.6	29757.1	38565	29534.1	65740.8	23468.8	115578	68161.2	11411.6	1	81647.3	61022.9	89520.8	109521	83592.3	99578.2	105762	246692	47477.1	217459	267811	6363.76
A0A0D2ZPE6	Filtered	Filtered	1	Filtered	Filtered	396125	Filtered	Filtered	211289	143075	Filtered	Filtered	Filtered	Filtered	Filtered	Filtered	Filtered	Filtered	Filtered	Filtered	Filtered	Filtered	Filtered	Filtered	Filtered	Filtered	Filtered	Filtered	Filtered	Filtered	141093	Filtered	1	Filtered	Filtered	Filtered	Filtered	Filtered	Filtered	Filtered	1	1	Filtered	Filtered	1	1	Filtered	Filtered	1
A0A0D2ZPE9	2.79449e+06	1.27e+06	1.33005e+06	1.89975e+06	1.20834e+06	6.66187e+06	1.16565e+06	1.96804e+06	2.95714e+06	1.87117e+06	811468	590095	683768	707097	685499	905498	1.09968e+06	593135	533565	721876	1.04347e+06	834104	993133	926578	649333	486447	984756	605883	396768	926556	2.45468e+06	1.01617e+06	442180	738078	1.03326e+06	721046	665417	941550	687621	638198	916573	735449	1.62784e+06	913972	1.48768e+06	2.04682e+06	2.27648e+06	1.85037e+06	743760
A0A0D2ZPL2	133626	72326.2	Filtered	107520	118982	149444	37557.7	57618.5	120435	4363.7	45073.8	54520.3	52071.6	56437.8	38271.5	57002.8	34687.2	46669.2	51260.3	2514.33	42331.9	60959.8	58820.7	94990.1	1948.96	23152.1	19046.7	36052.6	3935.69	13649.5	926.213	32437.2	44581.4	1	23558.5	39807.4	290747	1	47114.9	26952	104331	111785	79865.3	111619	124353	46969.5	165929	275367	100072
A0A0D2ZPN4	901735	484755	700969	610537	647779	2.63717e+06	781088	561678	903953	624870	456415	331878	375309	401588	345360	328101	362109	359464	379437	425519	310082	328568	322233	407238	348380	330342	515227	475994	225366	501858	930011	279210	440791	498819	448513	407945	376865	417599	329944	409995	468785	429157	387017	496857	430157	281836	555243	776258	476535
A0A0D2ZPP3;A0A0D3BMY7;A0A0D3CDQ8;A0A0D3CQR8;A0A0D3DYJ4	302955	Filtered	Filtered	59896.7	206709	267637	81293.3	Filtered	Filtered	Filtered	Filtered	Filtered	Filtered	78244.9	Filtered	Filtered	Filtered	Filtered	Filtered	Filtered	Filtered	Filtered	Filtered	Filtered	Filtered	Filtered	Filtered	Filtered	Filtered	Filtered	Filtered	Filtered	Filtered	Filtered	Filtered	Filtered	5125.85	Filtered	Filtered	Filtered	Filtered	Filtered	Filtered	Filtered	153509	Filtered	Filtered	440309	Filtered
A0A0D2ZPQ1	Filtered	Filtered	3146.5	Filtered	Filtered	Filtered	Filtered	Filtered	33424.8	6926.47	Filtered	Filtered	Filtered	Filtered	8404.45	4266.95	17580.9	28228.3	45766.1	35241.8	35941	30581.6	25862.9	31548.1	33615.7	52698.8	18136.5	61835.1	33070.7	42485.3	21738.3	24729.6	20859	35076.8	3201.11	20541.6	16338.3	Filtered	Filtered	11165.6	Filtered	Filtered	Filtered	7745.32	Filtered	Filtered	Filtered	Filtered	18712.5
A0A0D2ZPT8	183611	219226	260609	255422	182450	609412	829223	358482	107571	347819	176887	194575	388921	108060	176252	123922	171473	242797	175809	260440	221982	153137	181021	213060	226329	265027	259213	396877	247715	351446	160603	266184	166164	252128	174712	297804	164823	157590	254260	232978	433870	641483	560527	502792	424239	599788	438241	538873	519095
A0A0D2ZPU3	598329	336887	166525	495524	304760	252732	139415	507631	264036	75259.1	170831	70461	91173.8	239723	53917.9	253520	155995	125953	51485.5	79103.8	109856	159439	158902	184593	191108	80931.8	215211	139285	189435	97644.5	126097	247367	64568.2	273005	273755	97836.2	263351	260944	437032	243483	224257	243555	420082	469329	646079	489740	554927	755898	194845
A0A0D2ZPV9	41495.1	92213.3	85294.4	137937	70965.5	Filtered	Filtered	181004	Filtered	56812.2	104510	73030.8	97276.7	128311	45032.5	56991	29895.2	47962.9	41001.1	36627.9	26172.7	61339.1	73613.1	35104.6	43357.9	15534.8	49118.2	56987.2	54449.5	9236.5	22973.8	Filtered	28984.6	49090.2	18422.5	67190.1	25923.2	93268.3	79286	43455.2	115409	100388	127710	93973.8	143726	120071	85860.5	225772	71987.7
A0A0D2ZQE9	Filtered	Filtered	101969	49307.7	Filtered	635002	50857.1	Filtered	230293	380303	Filtered	23522.5	Filtered	Filtered	9794.42	Filtered	Filtered	Filtered	Filtered	Filtered	15643.3	Filtered	Filtered	15978.3	Filtered	Filtered	Filtered	20972.3	Filtered	Filtered	150340	Filtered	10277.3	Filtered	16362.2	Filtered	Filtered	Filtered	Filtered	Filtered	Filtered	Filtered	6112.56	Filtered	Filtered	Filtered	Filtered	Filtered	Filtered
A0A0D2ZQG6	650501	408356	3.9111e+06	477734	723198	16451530	720288	284390	11565529	10946249	304550	664029	629634	377313	693268	410478	622824	636856	1.4066e+06	1.06638e+06	1.25255e+06	782899	783528	706015	414551	626957	875473	577214	278890	2.55021e+06	15855736	761097	1.41211e+06	1.89233e+06	337025	749116	506944	450861	267921	344027	707242	898509	473110	2050077	479954	642447	539758	614444	876278
A0A0D2ZQI7	Filtered	11990.8	Filtered	Filtered	Filtered	Filtered	Filtered	Filtered	24708.6	24678.3	24991.1	19610.2	28973.5	Filtered	14392.3	17108.2	15044.1	17708.1	26773.7	27633.7	29921.3	12083.9	30768.6	21601.5	7412.67	16102.3	13772.5	17767.4	6270.79	4582.17	9669.39	14613.6	17536.9	13963.3	1	28828.1	14814.5	11811	17363.1	10949.9	Filtered	6163.22	Filtered	1	Filtered	8626.58	1	Filtered	24679.8
A0A0D2ZQS3	Filtered	1	Filtered	Filtered	Filtered	Filtered	1	1.19523	80141	8478.86	61493.6	20137.8	105197	343328	104283	199106	74446	Filtered	Filtered	4988.9	27984.8	122273	100232	102929	Filtered	Filtered	1	Filtered	Filtered	1	Filtered	Filtered	17119.9	20033.8	27849.9	2147.64	164620	39470.1	31222.1	75445.7	Filtered	1	Filtered	Filtered	Filtered	Filtered	Filtered	Filtered	Filtered
A0A0D2ZQS5;A0A0D2ZQT0	Filtered	Filtered	Filtered	Filtered	Filtered	Filtered	Filtered	Filtered	28955.3	185409	35465.2	Filtered	525890	311055	224175	87180	Filtered	Filtered	Filtered	Filtered	134380	Filtered	62435.2	Filtered	Filtered	Filtered	Filtered	Filtered	167569	61478.2	Filtered	Filtered	Filtered	Filtered	5450.33	59862.4	Filtered	Filtered	Filtered	Filtered	Filtered	Filtered	Filtered	Filtered	183505	Filtered	Filtered	Filtered	571.852
A0A0D2ZQS7	Filtered	Filtered	Filtered	Filtered	Filtered	Filtered	Filtered	Filtered	Filtered	23809.1	61743.1	15256.7	72032.4	123085	55270.8	137620	44855.5	Filtered	Filtered	8111.99	26122.8	79727.6	58269.2	62948.2	Filtered	Filtered	Filtered	Filtered	Filtered	Filtered	Filtered	Filtered	9212.07	Filtered	Filtered	2874.57	94881.2	4959.63	Filtered	3089.9	Filtered	Filtered	Filtered	Filtered	Filtered	Filtered	Filtered	Filtered	Filtered
A0A0D2ZQX2	494231	191109	246462	221635	351291	444912	239435	513419	733577	116806	497944	154875	144637	373198	166259	161915	72097.5	107067	134640	107875	61514.9	298756	130150	180900	436863	95267.8	137263	177642	389275	131765	321255	263438	389971	538279	247363	83068.3	213747	437979	345872	409400	327022	197969	465248	539362	399704	795569	371726	591996	303039
A0A0D2ZQY5;A0A0D3CJB4	621799	337516	174434	455083	272980	Filtered	265205	495852	10479.9	146501	235504	123598	179321	196310	128075	230783	210396	215365	127024	153138	188699	246153	213536	255443	201216	192948	247124	195700	190192	238440	139575	277311	181708	308301	293810	175615	276881	274586	311748	268563	306058	245958	329159	339346	421467	279769	373475	431214	178920
A0A0D2ZR50	Filtered	Filtered	Filtered	Filtered	Filtered	Filtered	Filtered	Filtered	Filtered	Filtered	Filtered	Filtered	Filtered	Filtered	Filtered	Filtered	Filtered	Filtered	Filtered	Filtered	Filtered	Filtered	Filtered	Filtered	Filtered	Filtered	Filtered	Filtered	Filtered	Filtered	Filtered	Filtered	Filtered	Filtered	Filtered	Filtered	Filtered	Filtered	Filtered	Filtered	Filtered	27856.6	Filtered	Filtered	Filtered	Filtered	Filtered	Filtered	22104.5
A0A0D2ZR54	3486.46	17152.5	Filtered	25900.1	452.407	Filtered	4633.22	Filtered	5234.22	31553	13839.5	16158.7	12109.3	224.536	7127.4	Filtered	9321.93	15615.8	14334.7	14584.5	2918.49	5694.97	1603.94	6140.16	3393.33	12839.7	14174.1	9961.47	8320.01	5613.38	1	6823.8	4679.47	7233.76	3635.59	9074.56	3629.77	3845.23	7454.43	2106.2	21806.2	17962.9	22512.3	34370.9	25899.8	31201.7	19510.4	41619.6	13627.8
A0A0D2ZR91;A0A0D3BZ03	110276	71723.9	81297	66902.1	36498.6	149269	47813.4	16077.2	85261.4	59473.6	51778.4	38815.9	40401.3	25018.1	31782.8	19675	55445.7	65716.4	49938.1	86335.1	50824.8	59328	56771	60418.1	38485.9	31797.1	67127.9	46462.1	20186.4	60275.4	72235.6	22638.1	33430.1	40469.9	34340.8	64599.7	46474.3	38687.7	35922.1	33168.2	59631.9	81906	37070.1	62621.7	40015.2	61735.7	98469	51452.4	41090.8
A0A0D2ZRE4	63132.5	106071	87336.4	115520	119832	Filtered	96424.8	81740.8	8083.92	33711	46077.3	62561.4	14443.6	34320.4	20153.3	84775.7	143807	77471.5	130016	97197.3	77249.5	93180	97347.8	113355	37234.1	127863	186732	174494	187135	127053	66988	90498.8	63603.4	159752	45297.5	86144.4	117907	53271.6	44670.7	85519.8	67829.1	66686.7	139375	115626	66839.7	245886	69316.5	34739.5	42441
A0A0D2ZRQ6	24777782	14251812	9477361	18074072	13100744	13960704	7.29934e+06	18041128	6059846	3.70309e+06	7.49934e+06	3962298	5109546	8276172	4.40676e+06	9340824	6632225	4691783	3.37608e+06	3.83072e+06	4.42044e+06	8393648	7.2054e+06	7447054	10682992	4.87914e+06	8995737	5.79302e+06	7783071	6.22034e+06	6.90121e+06	12089070	3.19939e+06	11444694	8105366	4.31047e+06	9099266	9337035	9842173	11609159	10043828	8730045	13216520	14010587	15451179	16880740	19012456	19117054	6881413
A0A0D2ZRT1	Filtered	Filtered	Filtered	Filtered	Filtered	Filtered	Filtered	Filtered	328223	134059	Filtered	Filtered	Filtered	Filtered	Filtered	Filtered	Filtered	Filtered	1	Filtered	Filtered	Filtered	Filtered	Filtered	Filtered	Filtered	Filtered	Filtered	1	Filtered	39248.8	Filtered	Filtered	Filtered	Filtered	Filtered	Filtered	Filtered	Filtered	Filtered	Filtered	Filtered	Filtered	Filtered	Filtered	Filtered	Filtered	Filtered	Filtered
A0A0D2ZS68;A0A0D3A2Q4;A0A0D3AJY6;A0A0D3B0M4;A0A0D3DHA7	Filtered	Filtered	Filtered	Filtered	Filtered	Filtered	Filtered	Filtered	211739	139158	Filtered	22442.8	21953.8	Filtered	69529.3	49728.6	Filtered	31153.5	38355.7	Filtered	42700.5	31952.7	18330.5	Filtered	22223.3	32705.8	Filtered	53140.9	22121.8	44021.9	88633.4	10628.6	49816.6	Filtered	36084.5	48829.4	Filtered	58081.4	9016.16	Filtered	Filtered	12120.2	Filtered	32170	Filtered	Filtered	Filtered	Filtered	22823.5
A0A0D2ZSD8	16534.6	20600.8	20033.7	40857.9	44779.5	22905.4	11607.9	28845.3	37551.4	21831.6	21568.7	29607.4	37029.6	33698.9	28424.6	35803.5	30077.1	34093.7	19989.7	29796.3	22072.3	38733.4	21284.6	17256.4	32460.4	25405.8	26755.4	29667.7	24041.4	37391.7	19307.8	29527.6	33838.2	36782.7	25742.3	37725.5	38337.1	44125.5	45449.6	68621.1	41346.3	12460.2	14249.4	5968.76	13568.6	21591.4	15643.9	25931.7	11578.6
A0A0D2ZSK2;A0A0D3AJ26;A0A0D3APM3;A0A0D3CXG3;A0A0D3CZK9;A0A0D3DPG9;A0A0D3DR23;A0A0D3E5C1;A0A0D3EFH4	Filtered	Filtered	Filtered	Filtered	Filtered	427440	Filtered	Filtered	Filtered	Filtered	Filtered	Filtered	Filtered	Filtered	Filtered	Filtered	Filtered	Filtered	Filtered	Filtered	Filtered	Filtered	Filtered	Filtered	Filtered	Filtered	Filtered	Filtered	Filtered	Filtered	Filtered	Filtered	Filtered	Filtered	Filtered	Filtered	Filtered	Filtered	Filtered	Filtered	Filtered	Filtered	Filtered	Filtered	Filtered	Filtered	Filtered	Filtered	Filtered
A0A0D2ZSK9;A0A0D3AAA7	Filtered	16944.7	97532.2	37794.2	109353	Filtered	13891.5	52528.8	8802.18	49418.2	70998.9	43281.8	85726.1	59132.7	39985.8	46583.2	14359.9	41222.8	44539.7	3980.08	17882.8	16062.4	Filtered	17814.8	2543.93	30761.9	24775.7	949.294	22603.3	32963.2	4692.88	38150.6	45965.7	45910.2	35595.1	41973.4	43900.4	53202.7	38989.4	26815.1	125667	66693.4	3861.79	5959.58	67836.1	97188.9	26067.2	93134.9	85966.7
A0A0D2ZSM0;A0A0D3AJ59	24294.3	35053.4	Filtered	24141.6	Filtered	Filtered	27808.5	10977	70543.7	48095.8	141995	46176	76645.4	71870.6	24329.5	32156.2	45456.4	58611.2	36673.2	49592.9	15556.6	58526.1	48236.9	82059.6	78547.4	62087.4	78788.9	55309.5	73142.1	45294.1	73426.7	90763.9	30940.9	96844.2	36019.6	49483.9	25923.9	85341.9	75467.8	110850	58391.9	52671.5	41590.6	74515.9	3563.47	33660.7	83527.3	11235.9	101597
A0A0D2ZSM3	Filtered	33102.2	154807	34600.4	100728	698506	27502	Filtered	280603	279171	112971	106568	68994.4	18753.4	76754.5	46325.3	30372.4	78872.5	98689.1	106611	143535	46375.5	48114.2	23675.7	44747.2	64956.5	51931.9	20090.4	37240.5	99186.7	271643	23084.3	41515	49998.8	40077	89628.6	49729.5	13596.1	21852.4	Filtered	64106.7	103741	18854.1	45692.2	53596.2	45962.6	34678.5	53938.7	102545
A0A0D2ZSN2	Filtered	Filtered	Filtered	Filtered	Filtered	Filtered	23000.4	Filtered	Filtered	Filtered	Filtered	Filtered	31309	Filtered	17923.1	16648.9	Filtered	33966.8	Filtered	Filtered	Filtered	Filtered	Filtered	35153.1	Filtered	40160.3	Filtered	Filtered	54249.1	Filtered	Filtered	Filtered	Filtered	Filtered	Filtered	Filtered	Filtered	Filtered	45443.8	Filtered	Filtered	Filtered	68614.1	Filtered	Filtered	Filtered	65364.4	61778.2	35574.7
A0A0D2ZSR3	Filtered	Filtered	Filtered	Filtered	Filtered	Filtered	2112.9	Filtered	Filtered	18115.1	1	43718.3	49573.9	33074.6	47183.8	13126.5	1519.27	53296.5	36695.5	71249.4	46625.1	1	28919.3	12641.5	1	35743.6	1	38471	12302.6	46830.6	25453.1	7143.53	18743.3	31867.3	36264.1	38731.7	59841.6	31964.7	27379.9	44942.9	Filtered	Filtered	Filtered	Filtered	Filtered	Filtered	Filtered	Filtered	23105.1
A0A0D2ZSS3;A0A0D3AHP2;A0A0D3BF69;A0A0D3E247	108167	52099	60368.3	102365	439387	9039584	2.15859e+06	377103	2.98091e+06	2.44395e+06	4452473	4173579	6396.63	3.47127e+06	1.92865e+06	21838.2	82704.1	24627.4	314051	3.13131e+06	2611341	3.39443e+06	385464	3618252	4419438	Filtered	71783.7	77594.4	2.68209e+06	2756.26	2451837	3.18678e+06	2092920	2.54619e+06	2.36908e+06	664485	2821340	3452482	2.83746e+06	2.87759e+06	3494176	6.27788e+06	2.56499e+06	114338	2.30522e+06	3.66052e+06	40227.7	1.5829e+06	2184537
A0A0D2ZSV0	39997.6	45714.2	3431.98	45311.4	31097.5	4718.56	3008.01	71864.6	48658.1	26514.6	60183.9	25173.8	38229.1	44398.9	34202.2	33108.2	44151.6	40799.3	24143	49086.9	25234.6	41270.5	40940.8	38389.4	43494	33260.7	30527.2	35158.5	25327.5	33783.9	33766	44804.6	30204.5	47952.5	43753.3	19276.9	47914.8	51848.6	54587.5	45260.2	27219.8	33014	40275.8	47951.8	57964	36511.7	76782.8	54435.3	30431.8
A0A0D2ZT76;A0A0D3DID4	819095	708584	816728	659957	1.19293e+06	1.37756e+06	783163	940488	483298	794489	692469	695869	605018	716948	610135	732115	504396	475726	528065	549715	536607	587714	751412	545981	731739	419657	655530	463556	616386	469974	814595	972369	586247	474307	527397	660522	527294	773944	502010	835438	763056	514251	565832	557234	665040	586544	720672	612572	564509
A0A0D2ZTD7;A0A0D3DEB0	Filtered	Filtered	1181.19	Filtered	Filtered	Filtered	Filtered	Filtered	10706.1	5407.12	8529.16	5555.08	6235.59	2104.65	4734.95	4790.57	3720.17	3198.86	7756.93	4163.31	6277.62	7136.49	5613.99	7493.82	3227.51	2281.34	2379.53	Filtered	1368.68	2912.65	3586.58	Filtered	5121.17	5374.9	5540.01	6985.35	3005.48	9240.01	7942.81	6101.34	Filtered	2840.21	Filtered	Filtered	1733.77	Filtered	Filtered	Filtered	6243.04
A0A0D2ZTG4	Filtered	Filtered	Filtered	Filtered	Filtered	Filtered	Filtered	Filtered	Filtered	2126.1	Filtered	1	1	Filtered	5391.56	Filtered	Filtered	3522.65	4931.52	5789.94	1	Filtered	Filtered	Filtered	Filtered	670.499	Filtered	Filtered	Filtered	Filtered	Filtered	Filtered	1048.81	Filtered	Filtered	Filtered	Filtered	Filtered	1	Filtered	Filtered	Filtered	Filtered	Filtered	Filtered	Filtered	Filtered	Filtered	Filtered
A0A0D2ZTJ3;A0A0D3A6J8;A0A0D3B342;A0A0D3D2J7;A0A0D3DN01;A0A0D3DWF9;A0A0D3E3I9	Filtered	381343	761659	292920	451269	503424	422824	Filtered	36186.1	397454	129335	498869	602474	197764	622052	436104	360902	502406	466270	682125	541916	325923	457691	461055	287905	390638	247908	364816	229162	516427	202916	294563	459792	99840.1	229252	503493	347266	191172	281804	116947	188614	222096	Filtered	Filtered	Filtered	134681	115427	40860.4	317695
A0A0D2ZTM7	Filtered	Filtered	Filtered	Filtered	Filtered	Filtered	Filtered	Filtered	36499	74548.1	Filtered	1	Filtered	Filtered	Filtered	Filtered	Filtered	Filtered	2620.05	4740.15	3439.66	Filtered	Filtered	Filtered	Filtered	Filtered	Filtered	Filtered	Filtered	4880.99	42583.7	Filtered	Filtered	Filtered	Filtered	Filtered	Filtered	Filtered	Filtered	Filtered	Filtered	Filtered	Filtered	Filtered	Filtered	Filtered	Filtered	Filtered	Filtered
A0A0D2ZTQ9	259730	297653	161360	279139	230194	266749	173515	267108	233396	136772	242080	111924	170813	120212	156168	161811	135828	114974	125117	117202	112226	157221	152863	174260	248157	140734	210894	165694	147608	111755	170572	175950	116436	201794	160917	164440	166530	265409	190935	181799	201681	133107	231839	278996	275609	251903	291119	355876	170061
A0A0D2ZTX7	902945	915392	953381	939636	1.17628e+06	1.78535e+06	871835	678425	3.47554e+06	1463759	1.05132e+06	1.03665e+06	882734	892641	815783	730082	769610	796654	640491	1.00749e+06	526979	773018	816390	844973	708968	913070	707057	1.39917e+06	614558	642830	636613	682619	654121	593201	614290	1.07594e+06	926637	823524	540665	787253	1.11174e+06	828839	815668	811848	757393	950581	822860	607007	1.01501e+06
A0A0D2ZTY3	45867.8	72667.4	Filtered	Filtered	Filtered	Filtered	Filtered	66715.6	Filtered	Filtered	Filtered	Filtered	5923.92	Filtered	16590.6	Filtered	Filtered	Filtered	Filtered	Filtered	Filtered	Filtered	Filtered	Filtered	Filtered	Filtered	Filtered	Filtered	Filtered	Filtered	6254.76	Filtered	Filtered	Filtered	Filtered	Filtered	Filtered	Filtered	Filtered	Filtered	36960.2	26132.6	98110.8	93436.5	98477.4	56423.9	45549.9	93509.6	Filtered
A0A0D2ZU29	649995	692909	602963	385313	321057	325420	470930	686002	165469	90117.2	274499	121667	149277	243761	172298	218514	232549	141323	104809	134798	74656.9	184756	165374	239012	392858	236187	338588	239097	256474	216224	261278	309343	184314	290783	227362	173307	227033	201866	359172	252637	546995	475986	449556	642696	723433	324513	736287	1.11454e+06	292047
A0A0D2ZUA1	Filtered	37898.5	21192.5	34171.5	Filtered	Filtered	56466.3	76786.2	3544.42	15222.4	Filtered	19876.9	20658.5	Filtered	18091.1	30956.1	16197.3	11776.8	4540.36	Filtered	Filtered	13596.8	5829.91	Filtered	16404.7	7826.16	6061.75	Filtered	32141.9	1826.72	5332.11	Filtered	17453.2	41833.5	32305.2	31946.6	17007.2	25647.5	37779.5	18515.8	97774.1	172381	110539	31611.3	38878.7	1033.82	55863.9	76248.9	2096.62
A0A0D2ZUD1;A0A0D3BNB6;A0A0D3BNB7;A0A0D3DV70;A0A0D3E047	48608.6	109152	34617.9	Filtered	67991.1	39884.1	26051.2	118876	21913.6	Filtered	85217.6	30951.2	33324.8	59552.4	26652	10784.9	31595	9045.59	27275.6	Filtered	16021.5	51704.5	63546.3	66476.7	6693.27	27989.3	58013.4	44082.2	35061.2	48539.2	47866.2	Filtered	18791.9	87707.3	42483.8	54428.1	74616.6	58635.6	108768	38486.3	114146	36670.5	117093	95408.1	117475	157676	149151	130792	18884.1
A0A0D2ZUL8	4066755	2.6156e+06	3.66758e+06	3.35499e+06	5.25138e+06	3652541	3.98841e+06	3342929	1.97925e+06	2176437	2.51104e+06	2015303	2.73017e+06	2.30521e+06	2.08133e+06	2.45705e+06	2.16997e+06	2458943	2.76505e+06	2.40517e+06	2829993	2866150	2.72642e+06	2.5806e+06	2.04402e+06	1.97987e+06	1.95612e+06	2.10543e+06	1.35038e+06	2.53504e+06	1443191	1.94798e+06	2.34918e+06	2.52842e+06	2.80589e+06	3.42076e+06	2825377	2905487	2107132	3.48177e+06	3258330	2.63615e+06	1.92355e+06	2187438	2.38212e+06	2.7603e+06	2.83535e+06	2.72366e+06	1.80235e+06
A0A0D2ZV44	Filtered	Filtered	Filtered	Filtered	Filtered	Filtered	Filtered	15116.3	Filtered	Filtered	Filtered	5106.98	Filtered	44049.8	Filtered	4518.95	Filtered	Filtered	Filtered	1	Filtered	Filtered	885.059	Filtered	Filtered	Filtered	Filtered	Filtered	Filtered	6927.18	Filtered	Filtered	Filtered	Filtered	Filtered	Filtered	Filtered	Filtered	Filtered	Filtered	29530.7	Filtered	Filtered	Filtered	180676	41159.1	18172.9	Filtered	Filtered
A0A0D2ZV87	304076	149194	132864	206526	208848	194238	164998	211151	120997	87647	161777	82991.3	145168	167824	126744	170218	183622	121369	112458	119075	111338	173993	175747	197782	148901	101695	184164	154633	120578	146548	151441	133198	107400	221130	208896	110315	250977	286269	213229	207200	188385	126847	219800	212553	324891	256564	330782	378845	166966
A0A0D2ZVV8;A0A0D2ZVV9;A0A0D3AIJ6;A0A0D3B0L0	Filtered	Filtered	74987.4	Filtered	Filtered	361377	83650.9	Filtered	166100	91826	30923.5	58954.8	22184	18802.7	39009.7	68534.9	47531.3	Filtered	52885	36749.9	59400.2	20691.5	44958.3	37254.3	11388.5	49855.9	50968.4	72563.8	48762	58691.2	63013.9	Filtered	43141.4	10607.4	19268.6	46677.8	15228.9	10241.1	14975.9	Filtered	80735	73862.3	85338.4	82305.1	53865.3	76332.7	79229.9	87881.1	55021
A0A0D2ZW25	63979.9	45223.3	16823	16980.1	9430	Filtered	12187.9	57444.1	174327	25301.2	92224.9	44691.3	45272.2	77793.4	42665.9	43312.2	26909	28797	31782.7	30094.9	30330.8	44676.1	36963.8	35684.9	79856.4	37376.7	54116.3	20529.7	49492.9	21824.9	53854.5	41804.4	53116.6	63415.5	51190.5	59947.1	58895.5	96144.3	59106.3	72736	20595.2	Filtered	11935.7	31773.3	23811.2	10649.1	27554.4	40751.4	55020.4
A0A0D2ZWE9;A0A0D3CZN8;A0A0D3CZN9	438702	331704	208966	362517	311785	608116	380300	341477	253629	315564	363910	260877	370075	228197	233696	212430	157233	253106	186867	207567	164142	188367	208541	197364	272775	238161	247975	384868	232514	211952	269601	219434	245089	359638	252120	379208	249698	369641	383637	281012	356414	299993	335436	276416	367547	409839	349511	843987	313071
A0A0D2ZWJ0	880483	924475	655957	641350	661229	931482	571028	709317	3.29378e+06	886918	2157866	935014	568901	1.81028e+06	623395	1.09716e+06	316249	136386	158839	148406	213328	260515	237494	198210	443961	264409	274721	294332	565878	107959	302377	443228	1.09329e+06	835254	750523	488148	1238199	942994	596147	704422	307221	293079	415451	458596	445428	554219	307844	682595	455192
A0A0D2ZWY3	144302	55516	71963.9	69706.8	66365.1	Filtered	87605.6	91302.5	114730	26510.2	71892.5	29814.9	38217.3	53640.4	59394.1	27455	38098.9	32455	33752.3	29560.6	35927.1	50568.5	59068.6	49863.6	43168.6	33348.8	36115.8	27690.3	25354.3	7711.63	41790.1	39226.9	76603.5	57266.5	39045.8	34178.3	72566.4	43702.8	43576.3	34908.5	10613.6	34413.6	58775.8	44165.5	43160.9	43472.2	42672.9	59651.5	28548.1
A0A0D2ZX73	11626118	14323375	5508623	7180854	8778368	9494910	5821227	10086183	30989360	4.39274e+06	7.0898e+06	3.47069e+06	5.28076e+06	7128671	3.39062e+06	6775522	4506702	5.39135e+06	4.31727e+06	4512426	6.32391e+06	6037357	5885941	5668744	7933683	5859628	5912579	5.46696e+06	8.27279e+06	6.42327e+06	6.73244e+06	9335493	3.5253e+06	3.96669e+06	4148511	4.1326e+06	6.35365e+06	4654350	4252527	5.58067e+06	4536224	4942829	7.95165e+06	10289826	7.11681e+06	8431194	6.45557e+06	5586184	4.02797e+06
A0A0D2ZY36	Filtered	23665.1	60678.8	79530.8	Filtered	Filtered	27987.4	83905.4	154713	112188	203647	121217	115892	187386	87442.8	90329.9	57410.8	36128	15307.9	45183	43334.2	99968.7	68782.6	82046.9	81544.4	34555.4	61743.1	60038.4	85256.7	25576.7	14887.8	67053.5	56860.2	108339	85881.7	46211.7	92914.8	157243	89732.3	112117	56218.2	18181	57172.5	100120	24446	66505.7	124503	107420	72989.2
A0A0D2ZY41;A0A0D3BAP0;A0A0D3CL95;A0A0D3E6P1	Filtered	Filtered	Filtered	Filtered	Filtered	Filtered	Filtered	Filtered	2557.7	Filtered	Filtered	Filtered	Filtered	Filtered	Filtered	Filtered	Filtered	Filtered	Filtered	2081.64	Filtered	Filtered	1383.29	Filtered	Filtered	Filtered	Filtered	Filtered	Filtered	Filtered	Filtered	Filtered	5256.34	446.872	Filtered	1105.19	1772.88	Filtered	Filtered	Filtered	Filtered	12261.7	5117.12	Filtered	Filtered	Filtered	Filtered	Filtered	10728.3
A0A0D2ZZ97	722197	177981	248289	278452	478531	420362	262599	365758	825388	86668.5	153040	87520.4	84258.9	208550	64651.1	149721	100742	85035.1	45108.7	90878.2	234656	136818	85449.8	136740	74401.3	102406	71419.4	41441.4	121498	126931	62969.1	297060	94340	113659	95783.3	61819.5	144829	147314	144569	72314.5	197350	208883	259392	249248	460509	241276	312285	471564	124223
A0A0D2ZZX4	Filtered	Filtered	Filtered	Filtered	Filtered	Filtered	Filtered	Filtered	79351.7	58986.6	732.276	Filtered	986.387	Filtered	741.254	Filtered	Filtered	Filtered	Filtered	Filtered	Filtered	Filtered	Filtered	Filtered	Filtered	Filtered	1325.39	Filtered	Filtered	Filtered	13209.2	Filtered	4809.09	875.527	Filtered	Filtered	Filtered	Filtered	Filtered	Filtered	Filtered	Filtered	Filtered	Filtered	Filtered	Filtered	Filtered	Filtered	Filtered
A0A0D3A0K7	336150	111883	134615	11179.5	60020.1	3.42214e+06	1.09215e+06	384644	36075.3	309192	381197	232509	112196	174478	43314.7	49395.8	112512	60940.5	31777.6	90436.2	72767.8	57050.6	161390	150804	62236	198969	245561	245347	74721.9	69605.1	103343	1.01736e+06	87919.7	104340	141174	212303	60062.5	60652.5	119138	191698	398257	428588	492093	434276	297294	142927	453766	632046	187054
A0A0D3A0S0;A0A0D3AAG0;A0A0D3C7W0	Filtered	Filtered	Filtered	Filtered	Filtered	745305	125533	Filtered	Filtered	Filtered	Filtered	Filtered	Filtered	Filtered	Filtered	Filtered	Filtered	Filtered	Filtered	Filtered	Filtered	Filtered	Filtered	193517	Filtered	Filtered	Filtered	Filtered	Filtered	Filtered	Filtered	Filtered	Filtered	Filtered	Filtered	Filtered	94131.5	Filtered	Filtered	Filtered	Filtered	Filtered	Filtered	Filtered	Filtered	Filtered	Filtered	Filtered	Filtered
A0A0D3A0U0;A0A0D3BJ99;A0A0D3DIG5	184717	57543.6	47012.3	27616.4	6198.57	102896	Filtered	61931.6	16426.9	43337.9	55134.2	30163.4	36893.7	62797.3	27705.8	71317.6	152152	123190	61815.4	84875.9	125332	153664	168936	151347	182723	153223	242328	160764	124575	193196	139410	307133	56743.5	82641.1	140522	56164.1	87908.7	49814.5	89601.3	95781	42188.8	87520.2	74150.7	90609.6	17445.7	73926.3	44881.4	116451	16613
A0A0D3A0U5	Filtered	49849.1	16864.9	Filtered	Filtered	Filtered	Filtered	Filtered	Filtered	68005.6	80808.7	70559.9	74488.1	47244.5	57476.1	63884	57876	62450.8	65393.6	73314.1	47199.1	63785	56215.4	44546.4	64183.6	46087.9	58573.6	58324.6	49029.5	39090	48769.5	61511.3	24896.8	46061.9	40064.4	71377.3	51735.2	70999.2	49381.2	71899.9	72925.4	53547	43994.5	56020.7	Filtered	49615.6	Filtered	22366.1	113220
A0A0D3A0U9	263723	160211	Filtered	221266	257232	Filtered	204873	267145	1.53186e+06	254365	272790	163417	164603	212997	192956	310857	324770	220607	158156	176785	249650	353598	374854	340728	282453	217689	287773	235820	243558	319585	510242	344685	159239	304542	182260	163599	408458	206608	273296	328940	198547	215510	166700	178504	196332	240665	226387	259537	290906
A0A0D3A0V7;A0A0D3BJC4;A0A0D3C0Z9	Filtered	2588.86	Filtered	Filtered	Filtered	100619	Filtered	Filtered	60545.9	32220.2	Filtered	3852.84	1669.19	Filtered	Filtered	Filtered	4677.35	Filtered	5825.49	Filtered	3890.71	7087.25	5964.85	Filtered	2914.84	2243.59	4336	4361.65	2672.89	6638.21	Filtered	Filtered	6431.12	7371.67	Filtered	4668.76	Filtered	7581.88	Filtered	Filtered	6484.05	10757.5	9278.49	15390.6	Filtered	Filtered	5077.54	Filtered	4375.53
A0A0D3A0W5	231899	54066	47672.2	112216	169244	266551	114986	113088	1	16747	1	40319.2	20807.2	103172	31452.6	33929.9	23602.8	42259.7	1	35220.8	33949.6	24745.9	27064.8	25126.4	29647.9	Filtered	20734.8	14713.6	11589.8	17767	14497.8	Filtered	31891.8	17615.4	17367.6	32905.4	19874.5	1	50310.3	27984.3	67218.1	40537.2	8334.04	5241.22	58512.6	44513.5	20467.8	155733	52970
A0A0D3A0W9	25489802	19719864	18279558	27856376	23486656	30861810	16165181	24974558	10015803	9364308	21934162	12698013	11036957	19341284	8927988	16264475	10200824	11448841	5722744	12509602	8713809	16193450	12793786	15920417	23565742	14820178	18828290	18943428	9052330	11694451	15802343	18330984	15109411	21636094	20275700	8.27252e+06	21962298	23273000	18909162	21451478	22620616	18658276	19614502	25787712	24174992	20246130	22614980	28232414	12679023
A0A0D3A0Z8	Filtered	Filtered	Filtered	Filtered	Filtered	Filtered	Filtered	Filtered	59033.8	138685	142806	134074	151702	Filtered	105154	58422.7	Filtered	Filtered	Filtered	Filtered	Filtered	Filtered	Filtered	Filtered	Filtered	17219.3	Filtered	Filtered	Filtered	Filtered	Filtered	Filtered	Filtered	26356.3	Filtered	53499.8	45590	63303.3	35602.3	Filtered	Filtered	Filtered	Filtered	Filtered	Filtered	Filtered	Filtered	Filtered	Filtered
A0A0D3A114	123153	178143	125810	121037	151510	474277	88468.2	284011	741569	260743	560127	337710	299748	343165	175736	285254	196016	123076	126370	132313	89894.7	216330	186951	205456	307887	158166	225925	300800	362433	98295.2	417214	291863	172240	351291	206261	163539	286070	395464	265102	315770	124869	35471.1	110516	168492	194866	128266	127830	253215	223160
A0A0D3A122	Filtered	Filtered	130660	24317.7	Filtered	Filtered	Filtered	12559.8	28586.7	76167.8	40029.5	97210.6	50217.6	36042.5	69818.2	18514.9	44318.4	94323	63242.9	131807	150099	70734.2	75087.2	71528.1	27069.1	61146.4	68296.4	125597	45868.4	114110	4379.7	35033.9	53026.2	34983.7	43691.9	107235	45141.2	11376.8	61482.6	17247.8	28657.1	27893.6	20923.6	17250.8	Filtered	57461.7	Filtered	5378.12	36588.9
A0A0D3A152	468278	437512	520051	336670	614705	1182204	504115	320379	537357	354900	307391	350359	332851	286813	368140	274336	476844	332298	691565	749650	577038	359691	363002	459628	336978	379508	410048	332105	154858	339777	322608	252688	441779	251212	253407	518966	289946	305508	154321	241348	424909	401573	236923	225373	172308	314000	241095	244971	551958
A0A0D3A154	Filtered	78430.1	149867	144114	180939	157136	200517	66490.8	173760	79733.5	134606	162643	134018	117081	150994	115679	111122	110216	219982	244072	100909	85328	111143	108238	77173.8	144330	54663.3	159258	64964.1	85716	91865.9	28076.1	293516	92285.4	147573	233243	81781	142515	91257.1	117241	93611.8	129782	20735.5	58437.4	82711.3	159878	60552.4	137467	48432.1
A0A0D3A156	Filtered	31852.3	Filtered	Filtered	Filtered	Filtered	Filtered	11506.8	33090.8	17943.4	6952.42	14790.5	19003.7	Filtered	10443.3	2373.06	3994	6510.71	8151.15	24012.6	21448.8	18313.1	10545	9056.24	9974.99	19970.1	13107.7	Filtered	7844.98	Filtered	3527.98	16751.7	13795.4	8556.08	6640.85	13819.9	18780.2	9181.44	5919.53	3819.25	Filtered	8422.54	Filtered	4657.25	Filtered	Filtered	Filtered	Filtered	19038.8
A0A0D3A161;A0A0D3BJR3	Filtered	Filtered	Filtered	Filtered	Filtered	Filtered	Filtered	Filtered	Filtered	Filtered	Filtered	Filtered	Filtered	Filtered	Filtered	Filtered	Filtered	Filtered	75018.9	Filtered	74906.3	34472.6	Filtered	Filtered	19341.6	123703	47349.3	49042.3	107271	55032.5	39887.4	201765	94205.4	Filtered	73257.8	93008.2	150073	Filtered	41408.5	84401.2	73704.6	193576	119785	176949	70375.9	125022	61863.2	Filtered	22541.6
A0A0D3A1B0	2.22104e+06	1687064	2.34499e+06	1.94892e+06	3.02452e+06	4.30084e+06	2471583	2224431	5.53016e+06	1.10033e+06	4.0909e+06	2.21643e+06	1.54558e+06	5625748	2.28534e+06	4.38728e+06	2.10546e+06	1.46528e+06	1.71342e+06	1926774	1.38948e+06	3007444	2.61044e+06	2.18556e+06	3.26675e+06	1658123	2.18106e+06	2.35123e+06	2.42255e+06	1.13786e+06	2.76836e+06	2.87772e+06	2.7376e+06	2624556	2.98755e+06	1.92577e+06	4116429	4047018	1.99979e+06	3.46324e+06	1.20683e+06	1.61203e+06	1.29082e+06	1.85735e+06	1.87608e+06	1.1887e+06	1.47219e+06	2303598	1.35154e+06
A0A0D3A1E5	Filtered	15805.5	Filtered	49358.2	Filtered	Filtered	129128	Filtered	Filtered	Filtered	Filtered	Filtered	7574.77	Filtered	7137.35	Filtered	Filtered	8312.44	Filtered	6724.52	4431.06	Filtered	Filtered	Filtered	2164.54	Filtered	Filtered	7674.42	Filtered	Filtered	9263.34	Filtered	11862.9	15568.3	11215.2	22069.5	Filtered	20120.3	24124.5	Filtered	35704.8	48241.2	27078	30057	27173.4	25682	25812.9	32209.5	47659.7
A0A0D3A1E7	Filtered	Filtered	Filtered	Filtered	Filtered	Filtered	Filtered	Filtered	Filtered	Filtered	Filtered	Filtered	Filtered	Filtered	Filtered	Filtered	Filtered	Filtered	Filtered	Filtered	Filtered	Filtered	Filtered	Filtered	83.8793	Filtered	Filtered	Filtered	Filtered	Filtered	Filtered	Filtered	74.144	546.313	Filtered	420.454	347.727	Filtered	736.677	Filtered	Filtered	Filtered	Filtered	Filtered	Filtered	Filtered	Filtered	Filtered	75.2006
A0A0D3A1F3	358108	203997	359129	284657	464559	581067	373523	260676	21600	84191.9	251423	230861	262806	226496	194564	263711	133644	190271	159834	187890	159495	170233	156045	91930.5	208795	214404	158468	273601	185416	313520	110108	213200	102507	171148	288002	116369	205347	236944	163757	255008	599780	681014	435280	486704	452264	491628	347815	559239	180956
A0A0D3A1H0	204257	106256	75646.5	121000	142001	83599.4	208194	143203	46715.4	119151	57114.6	81580	49568	212190	73630.8	50868	37442.7	38785.3	37364	21683.6	47973	41927.5	63792.6	58741.2	40464.7	44890.6	40911.5	50148.2	49403.8	97881.7	35757.7	62558	79473.1	38515.2	46187.3	94102.3	80059.6	79817	75880.6	109560	184179	404558	190682	63136.9	188377	256182	279085	156723	117199
A0A0D3A1I4	Filtered	7190.55	Filtered	Filtered	Filtered	Filtered	7284.26	Filtered	8600.47	11739.1	13545.8	12186.8	Filtered	8843.59	7083.27	9942.31	8957.44	7832.8	Filtered	4474.55	12015.3	13071.7	12121	17539.6	7333.33	5275	Filtered	Filtered	Filtered	6239.19	Filtered	5623.77	Filtered	10180.9	11293.5	7272.95	14541.7	Filtered	Filtered	9388.53	17420.7	Filtered	12378.9	10939.2	17714	14397.3	Filtered	Filtered	11673.9
A0A0D3A1M4	722612	810922	526951	932449	646073	653068	491132	655522	331610	318006	477185	277218	353710	357427	249981	349615	503030	420130	393844	499334	356171	505288	490800	588908	542492	311932	473977	411352	388854	271412	443279	479068	262310	568216	374310	344788	504565	597898	468692	489985	623642	542961	641645	845796	804578	857725	687504	788436	394887
A0A0D3A1N6	Filtered	9507.48	Filtered	1464.43	1955.93	36467.8	1452.9	20038.1	1808.97	14893.8	11303	3037.74	16963	4735.05	15405.8	13767.3	6066	9302.96	5982.12	11004.4	15728	15402.2	19502.1	11118.8	8614.39	17881.1	9464.44	7595.16	8462.1	12670.7	19995.3	40510.1	31183.3	25022.5	28199.2	31589.5	17267.5	46927.5	46919.2	57427	600.692	1	2581.21	1006.53	4436.93	7162.37	Filtered	2275.59	14864
A0A0D3A1R0	Filtered	61865.2	13255.9	8228.04	Filtered	Filtered	177226	73190.2	28660.9	34977.1	56947.2	10515.4	48151.9	32040	34473.7	26138.7	Filtered	19987.5	5941	Filtered	Filtered	Filtered	2323.21	Filtered	Filtered	1	Filtered	Filtered	Filtered	36472.1	4295.79	Filtered	3709.46	13510.3	Filtered	63713.8	5610.65	29969.1	18301.7	1	53197.7	60949.2	33046.6	Filtered	Filtered	30303.2	1	144709	119747
A0A0D3A1R8	2.1362e+06	1.59273e+06	1.62682e+06	1.86136e+06	1474781	1.57218e+06	1.61128e+06	1.37692e+06	648900	268124	917353	346468	415973	1.08871e+06	463814	732595	628529	359800	359939	409308	354720	795898	549108	779744	1.28445e+06	606817	1066201	557408	1.03389e+06	436952	872657	914315	856765	1.24487e+06	1.21276e+06	522594	1.20392e+06	1.35339e+06	1.13422e+06	1.38743e+06	760089	770895	1.00865e+06	1.79752e+06	1.10279e+06	1.61884e+06	1.07435e+06	2213355	592554
A0A0D3A1S9;A0A0D3BE85;A0A0D3E345	588068	307237	210681	221949	285125	358765	203274	163498	84030.1	80161.5	108565	121005	167668	102453	121835	124656	147992	120308	111786	188307	123318	97400	127861	130062	7779.89	78126	58851.4	140605	72704.7	128068	46216.6	60725.7	143849	179723	173075	157608	248495	156075	110540	221284	264977	346746	137205	228563	167519	128787	434858	475070	172380
A0A0D3A1W3	518368	589629	616539	704918	502131	510028	424148	515373	1.75388e+06	515016	968682	678629	726655	818036	594901	807995	905862	701916	808573	903548	712133	982015	756948	928808	1.13373e+06	754234	972003	725313	773118	919781	843101	1.00825e+06	655700	1.05492e+06	825254	700959	1.21908e+06	995663	956031	1281662	1.00845e+06	977444	932627	1090367	1.17993e+06	1.01203e+06	1.02407e+06	1.13229e+06	983761
A0A0D3A1W5	Filtered	27669.9	20163.6	Filtered	Filtered	Filtered	Filtered	Filtered	Filtered	Filtered	Filtered	Filtered	2471.35	Filtered	Filtered	2090.69	Filtered	7282.29	Filtered	Filtered	Filtered	6627.96	Filtered	Filtered	12621	6488.37	6700.91	10805.5	9930.72	25156.1	Filtered	7947.33	Filtered	Filtered	Filtered	Filtered	Filtered	Filtered	Filtered	Filtered	29012.6	21397.5	14556.9	Filtered	16679.3	13293.4	Filtered	Filtered	Filtered
A0A0D3A1Y6	64265.1	Filtered	Filtered	Filtered	50215.8	Filtered	105584	71858.7	66542.6	62569.2	102498	75409	109624	115542	134222	139250	208864	74961	249127	216418	223036	226383	253782	221179	72832.9	58336.3	122935	Filtered	109607	125617	111861	Filtered	79100.5	103659	59011.8	122710	133980	152171	141346	187868	114467	110428	80241.5	70743.7	38870.7	51958.3	57500.9	19418.8	69431.5
A0A0D3A1Z7	139214	89922.8	134803	100911	163943	210973	176849	77398	191963	121472	65905.1	135560	151662	138499	145668	146896	80408.2	93382.7	81537.8	124712	83386.8	85669.7	74072.4	83137.9	53896.5	77010.7	52810.8	68344.1	43056.5	86649.1	55569.8	82615.8	62833.5	71926.8	69001.8	138549	103540	80343	80101.6	101651	150950	159697	87064.1	74386.7	65907.5	106663	85348.8	70545	79540.8
A0A0D3A201	Filtered	Filtered	Filtered	Filtered	Filtered	Filtered	Filtered	Filtered	28793.4	Filtered	10766	2993.01	Filtered	24612	3507.39	10546.7	11297.4	Filtered	8120.02	8976.47	5259.38	12046.7	12483.7	11434.4	Filtered	6048.52	Filtered	Filtered	27744.9	Filtered	Filtered	Filtered	Filtered	Filtered	Filtered	15453.1	Filtered	Filtered	15394.9	Filtered	3590.76	Filtered	7646.13	Filtered	7175.11	5289.5	6152.88	Filtered	11139.9
A0A0D3A215	548838	317817	77437	225399	179034	226324	340532	417288	348238	175469	182736	153523	159573	215420	142111	228885	136391	126023	103877	158113	86806.5	197083	216718	197909	304966	179981	167343	162454	265676	136829	159182	233676	124496	247275	125869	228850	173790	170622	172785	297047	195661	466350	235866	486029	369233	333452	590580	779094	520767
A0A0D3A239	Filtered	Filtered	Filtered	Filtered	Filtered	Filtered	Filtered	Filtered	Filtered	Filtered	Filtered	Filtered	Filtered	Filtered	Filtered	Filtered	Filtered	Filtered	Filtered	Filtered	Filtered	Filtered	Filtered	Filtered	Filtered	Filtered	Filtered	Filtered	Filtered	Filtered	Filtered	Filtered	Filtered	Filtered	Filtered	79646.3	Filtered	Filtered	Filtered	Filtered	73322.8	45773.5	Filtered	Filtered	Filtered	Filtered	Filtered	Filtered	171372
A0A0D3A251	59105.8	146955	90672.9	Filtered	107481	Filtered	234666	Filtered	64119	216047	115437	185860	203388	27574.7	161858	146386	123677	199269	125279	200098	150716	117436	152825	72384.1	87490.1	123178	122355	240646	68951	177223	101990	98209.9	99363.5	88210.5	148613	107259	90578.9	154429	80183.8	161693	114227	168916	171581	107531	Filtered	250494	100711	Filtered	53374.9
A0A0D3A257	Filtered	Filtered	Filtered	Filtered	Filtered	Filtered	Filtered	Filtered	101371	87452.7	Filtered	1715.34	Filtered	Filtered	Filtered	Filtered	4472.55	1	2670.08	24531.2	10475.2	14272.4	Filtered	16717.7	1442.15	Filtered	Filtered	Filtered	Filtered	7325.02	66858.2	Filtered	5753.48	8048.16	Filtered	4241.21	Filtered	Filtered	Filtered	Filtered	Filtered	Filtered	Filtered	Filtered	Filtered	Filtered	Filtered	Filtered	Filtered
A0A0D3A261;A0A0D3BLK9	31039.9	15851	16879.9	28226.7	31894.4	94902.1	Filtered	Filtered	Filtered	14918.5	14665.1	14207.1	16818.4	9786.68	9641.03	19333.7	12883.5	19190.5	19990	14592.5	14539.4	22774.5	22967.3	15424.1	26759.8	17510.1	25264	11326.8	23556.8	20038	21939.7	29467.9	Filtered	17486.5	12419.9	12775.4	20000	12414.8	19609.3	19620.1	30965.1	Filtered	24093	19541.1	34780.2	17810.7	22243.6	26770.7	16349.6
A0A0D3A281	252504	130143	210526	308829	353299	184085	139788	306706	299089	133238	361204	170981	188715	270797	178057	278715	248320	84620.6	169166	189340	160171	287878	262165	290546	204789	180764	194319	42875.3	191521	99994.1	82226.4	285148	186765	384519	325922	191972	371394	304507	334383	479374	163309	149459	270251	78807.4	266545	125713	288280	249161	210728
A0A0D3A2C6	365748	236734	397208	447054	331647	1.04973e+06	279607	385582	393160	164486	92881.2	134860	144888	103957	161650	126218	153033	150469	163040	211173	217864	119200	168392	135763	66339.6	127959	104400	119331	56963.7	230773	235078	131824	130113	113314	79860.4	168221	148559	149010	20562.9	130685	188504	268089	245535	157535	90712.1	187080	252494	376319	131958
A0A0D3A2H7;A0A0D3BLR9;A0A0D3DHD6	144963	218940	199594	178220	307466	589723	282286	355151	530207	109802	229234	251258	41210.4	339955	161544	233772	141082	101231	146267	96674.4	153887	175393	178214	152641	156139	166724	156774	125366	218912	80508.9	183869	211167	51944.6	84009.7	122966	133201	158135	149425	143591	155707	210835	210720	52462.8	47413.1	Filtered	211005	189338	226603	133143
A0A0D3A2I0;A0A0D3BLS0	Filtered	192458	40806.3	1	63237.6	58749.7	143764	Filtered	Filtered	89531.4	110360	86792	78960.3	187744	74452.8	79521.9	56308.6	78049.4	79491.9	102794	58758.6	53864.7	43188.2	78851.5	420.048	99600.2	52124.5	80009.5	21693.1	52417	47381.8	94844.4	61964.1	41716.6	61918	87446.1	58413.5	126399	53150.3	66728	24728.4	139233	887.355	61329.8	117870	Filtered	32097.4	Filtered	43239.4
A0A0D3A2J7	12812.4	16690.1	78910	46699	151884	13214.9	55251.9	11478.9	6711.81	17490.3	6747.91	19491.7	12208.2	11955.8	8630.35	32206.6	1632.73	5487.07	2748.1	7435.5	3015.43	5385.99	7112.94	2183.49	4150.09	6288.84	1634.58	23175.5	2451.63	7496.09	18896.6	13489.4	4407.04	7383.74	9682.08	6811.29	14928.3	17505	26940	18050	21707.1	35252.3	24338.1	48661.9	41409	205263	30170.5	53272.4	11201.3
A0A0D3A2K0	558035	134526	434928	319502	245018	349272	136422	128518	51488.7	11882.6	35383.3	14035.8	27833.6	99716.4	34932.9	66665.3	104963	32850.4	43352.3	43654.8	36424.5	118022	116364	77927.1	93513.2	55374.4	70818.1	34475.6	86297	52502.9	74199.6	87692.1	52114.7	156477	142150	46413.4	205794	198719	278708	289889	86682.8	97993.5	151502	328343	420716	175688	145922	381796	155172
A0A0D3A2K4	Filtered	4388.24	Filtered	57.1734	Filtered	Filtered	Filtered	Filtered	Filtered	Filtered	Filtered	Filtered	1	Filtered	Filtered	Filtered	Filtered	1	1	Filtered	62.0175	Filtered	Filtered	2018.06	4782	1913.08	2270.88	1	Filtered	32.3415	1	1	2612.67	86.9071	3164.74	5016	2147.83	11886.5	1	3785.79	Filtered	1	Filtered	1	Filtered	Filtered	52.8291	Filtered	3986.16
A0A0D3A2L3	52177.2	65524.4	114183	57426.9	97861.2	116126	72281.5	77291	35646.4	56309.6	Filtered	66655.2	39478.1	31172.5	Filtered	37162	60850.6	72952.4	112570	115755	105082	77160.2	49145.4	68061.7	38338.2	69719.5	58247.8	130669	57014.7	118980	Filtered	67375.7	40488	44377.4	40603.4	85076.3	32985.8	33520.8	48091.4	Filtered	180331	203610	93583.4	103680	125919	116511	91969.6	135868	68907.9
A0A0D3A2M0	18654.4	5643.37	35760.7	56230.1	45759.2	Filtered	53622.2	26627.5	Filtered	44625.4	Filtered	20994.3	39026.6	29475.1	32452.5	36222.3	74310.3	62185.6	56391.9	28994.9	64712.6	89942.1	58492.9	56824.5	51106.9	58920.1	30152.1	45194.6	37237.7	67058.5	4978.25	30057.7	75076.1	75435.1	62056.5	46216.6	67460.6	8949.26	51427.1	53439.1	91514.2	54420.2	66776.8	104871	107124	113546	76691.4	14580.8	82879.3
A0A0D3A2M8	16134	28490.2	10709.5	Filtered	20223.2	Filtered	Filtered	47120.4	93844.5	86370.9	138335	29777.5	64338	100873	82416.1	90046.3	57408.5	29289.7	43313.9	55929.5	50878.1	61130.4	74649.4	72258.7	45952.4	46079.2	49685.7	54270.8	90762	13649.9	78179	72773.2	21685.7	60832	41729.4	29014.7	44595.3	56227.1	38667.7	95349.4	Filtered	Filtered	52677.6	48074.6	52112	35607.6	64438.1	110991	24990.6
A0A0D3A2N7	745955	1.1496e+06	971216	1.42194e+06	1.95969e+06	2.68768e+06	1589681	1.64753e+06	897661	457587	438092	527664	529608	634268	504347	696721	559423	467921	534706	609854	737897	583349	474497	597354	439213	461879	493573	493822	366855	620809	460847	570113	413422	905484	657994	984397	1.16458e+06	940412	713623	726222	1.12914e+06	1.39587e+06	1.43469e+06	973096	635966	2.54917e+06	831738	662690	1.02398e+06
A0A0D3A2R2	32663.6	40821.7	49973.2	34590.1	81237.5	38422.1	105362	30568.5	22265	14793.9	20784.2	16023.9	33937.2	7890.66	8572.76	15695.5	19238.5	41393.1	26461.1	32936.9	38300.8	23232	22528.4	18993.2	10935.3	36905.2	19238.9	29958.4	19478.9	53819.8	18595.8	26652.3	46459.6	29396.8	19135.8	43415.4	31953.2	35315.5	46565.1	21462.7	46574.6	45421	40289.9	23641.2	48637.1	47475.5	56972.8	52078.2	62880.6
A0A0D3A2R5	538906	701515	386108	325690	190462	1.0291e+06	382384	441060	1.69358e+06	419019	1.16346e+06	733992	525906	1664380	721853	738705	276535	315340	475082	317301	216672	476292	445701	323925	572423	382866	296766	452449	539588	210947	442648	273631	1.20176e+06	377242	554934	385676	545306	617351	486608	558161	419260	256157	508391	589097	420991	367316	422214	947361	519784
A0A0D3A2W3	Filtered	84717.9	191496	147589	178533	97123.6	241944	122504	91876.3	83690.8	52934.2	99266.1	64830.5	88821.4	75826.2	51492.8	72998.4	32807.8	87233.7	59437.1	94399.8	61905.9	42282.8	54752.8	54536.8	55511.4	58684.4	220594	154035	82305.2	22293.5	103667	34407.3	58772	107029	81491.2	52795.8	96512.4	106074	25132.2	222814	220293	284319	191840	133578	244094	159884	87083.5	37255.6
A0A0D3A2W6	219633	102622	120001	149718	174312	411276	149168	191087	225046	70497.5	160987	87823.4	78348.5	175777	109391	114507	94876.1	65028.8	82945.8	80662.2	74821.6	120167	124835	97579	80586.7	47171.6	91853.1	76330.8	82995.6	42346.5	54348.9	60373.4	80040.9	54501.1	81342.6	49457.7	53132.2	63540.7	91946.4	79365.7	173895	145069	164183	138592	219332	146100	158413	216955	91155.2
A0A0D3A2Z4;A0A0D3A6E4;A0A0D3C1Q7;A0A0D3EC58	31304.2	26870.7	Filtered	42503.1	Filtered	Filtered	55123.1	Filtered	Filtered	35633.3	43368.2	24783.2	40254.4	Filtered	27722.1	24950.1	29930	24815.2	32991.7	44798.4	26035.4	15893.8	17672.9	20832.7	23088.3	15277	17859.7	27246.2	12548.4	24604.3	5772.85	Filtered	39323.9	39358.4	28518.9	50864.6	20770.5	21822.7	36389.6	40958.4	Filtered	13957.8	12095.8	32898	27389.3	32821	34348.2	33084.2	25731.3
A0A0D3A305	22940.8	110667	149148	120708	96934.8	200518	108799	93002.7	247157	84084.5	163665	124115	120665	165949	122637	139437	140997	124250	180207	171522	145378	184346	174438	162705	154328	139049	156474	186981	132236	142735	133249	116508	174842	119296	141628	139884	194172	204477	106377	179301	140884	125894	54920.8	189025	135629	150285	141062	145002	86856.1
A0A0D3A318	179549	277067	154525	150496	40831.3	35080.4	256759	181734	69147.2	39684.8	35522.2	61459	48378.9	56732.1	51295.9	35722.1	71592.1	52588.2	80726.3	83908.1	42452.7	48319.2	48611.2	73000.6	35199.5	33390.6	47780.6	73441.1	51076.6	61472.9	27675	32222.5	105932	37692.9	90774	154316	94520.8	63712.9	39090.8	67712.9	327329	107569	88119.5	217137	269619	388118	320725	461455	41909.2
A0A0D3A371	820110	620390	715118	605778	691977	1.20775e+06	902136	1.04524e+06	734932	406431	492404	556856	553022	561910	589678	432012	568987	541880	319182	740225	703841	614096	499949	682352	525592	226268	352737	514698	298970	599878	472517	378971	462117	609025	618065	646137	738399	671910	684184	693733	722347	533870	747028	717786	815323	687785	817783	1.08023e+06	855599
A0A0D3A376	1.29896e+06	829638	480914	867646	838145	824837	531001	902932	614294	478164	888045	547107	650539	714798	478966	517702	580254	544703	474152	510285	475056	682529	606368	601654	741285	547828	799548	462873	597057	587690	509425	736992	366484	752244	579661	455318	625936	680328	740253	659138	596188	440639	535956	676380	808157	523314	756492	971329	625940
A0A0D3A3G0;A0A0D3A6K1	Filtered	Filtered	Filtered	Filtered	Filtered	Filtered	Filtered	Filtered	Filtered	31993.7	Filtered	29659.5	33578.3	Filtered	22022.8	10653.8	18026.8	27128.6	51762.3	39394.1	38898.8	21508.7	31163.9	29550.6	Filtered	1	Filtered	20576.3	24241.5	29669	20617.5	Filtered	1	6064.89	Filtered	24269.1	24484.9	Filtered	Filtered	10434.2	Filtered	38372.8	Filtered	3420.11	Filtered	26871.3	Filtered	Filtered	33177.3
A0A0D3A3G8	465025	316597	333925	322007	451083	420151	281084	258442	145853	353705	389819	298398	387664	274529	311601	493509	288101	207342	179732	241378	145666	228663	336404	235455	244958	150990	199673	298057	169827	186316	183809	235001	138717	258764	284011	338062	296080	341700	345272	398335	344993	238027	150204	262408	193513	246914	257019	227393	260052
A0A0D3A3H9	685879	358442	765716	1.96129e+06	935265	1.33668e+06	330216	844424	291579	183223	296415	388327	239826	299013	226066	431727	266323	282126	268904	289840	225719	552917	293809	367541	486366	471818	508016	553067	389317	436618	286355	495326	201640	439236	376248	214645	579566	358328	512429	381124	611168	579541	669125	940174	721362	552121	736588	684439	376629
A0A0D3A3L4	1.60669e+06	1.04608e+06	1.94278e+06	1.3972e+06	2.13075e+06	1.70526e+06	1549039	937172	685210	560960	651491	581155	903117	634884	839072	645430	1.14801e+06	999091	1.13485e+06	1.61155e+06	1.19736e+06	969198	935362	1.26266e+06	748360	873967	892131	866877	433560	1.17395e+06	584664	548157	1.29249e+06	1.04587e+06	1.07476e+06	1.59445e+06	1.11285e+06	963890	832452	1.08562e+06	1.92296e+06	1.41639e+06	1.33976e+06	1462651	1.39235e+06	1106023	1.72342e+06	1.59839e+06	1.51777e+06
A0A0D3A3M8	Filtered	Filtered	Filtered	Filtered	Filtered	Filtered	Filtered	27301.7	15069.8	41554.6	40601.8	53482	44434.1	12482.8	26758.6	Filtered	15483.8	6086.39	18696	14479.1	14788.4	3731.05	18890.6	17031.7	8771.62	5088.21	4310.33	19579.6	6707.33	10003.9	Filtered	Filtered	Filtered	Filtered	Filtered	Filtered	Filtered	Filtered	Filtered	Filtered	11068.9	Filtered	9672.86	Filtered	15784	10102.8	8097.76	17072.6	Filtered
A0A0D3A3P3	20676240	22212942	25799598	21249662	34639752	43728568	10381486	14653676	13618407	2.73911e+06	8079628	8558886	5092194	3256126	3553908	5.94845e+06	3.78629e+06	4.1611e+06	2464482	3414219	3890603	6331766	4.25391e+06	7.09708e+06	6782818	4378863	7399739	5466507	5891906	6039304	4.83321e+06	10278611	3.38908e+06	9570720	6800846	2632321	6254450	5610243	6644235	8507607	9311662	5.41853e+06	16233577	16048465	6888330	15734923	13393761	12766794	9722548
A0A0D3A3P4	876903	444109	233893	533902	337039	373193	252180	529322	1.14417e+06	98005.2	496165	155262	110287	690911	202135	400042	269761	240583	150660	227298	147560	482281	318508	349814	943856	429902	694157	567384	597152	386459	565990	609311	424729	553176	599014	216865	777848	748486	524361	605884	262661	209331	393651	568785	533216	590619	499383	457616	287739
A0A0D3A3Q9	Filtered	60812.4	17555.1	56321.4	Filtered	Filtered	1	91018.1	18327.3	1304.33	21993.2	Filtered	Filtered	12215.9	12820.2	30511.7	15812.2	2071.74	Filtered	Filtered	Filtered	32490.5	26358.7	Filtered	20045.7	7507.38	18909.7	Filtered	30098.8	Filtered	14464.1	35621.7	26567.1	49034.9	27954.4	6354.17	74459.4	29021.6	26497.4	38470.9	Filtered	Filtered	Filtered	9867.62	Filtered	1	15831.9	Filtered	7157.41
A0A0D3A3R7	Filtered	1.20468e+06	Filtered	Filtered	167273	Filtered	Filtered	Filtered	Filtered	Filtered	Filtered	Filtered	Filtered	Filtered	Filtered	Filtered	Filtered	Filtered	Filtered	Filtered	Filtered	Filtered	Filtered	Filtered	Filtered	Filtered	Filtered	Filtered	Filtered	Filtered	Filtered	Filtered	Filtered	Filtered	Filtered	15487.6	Filtered	Filtered	Filtered	Filtered	Filtered	Filtered	Filtered	Filtered	Filtered	Filtered	Filtered	Filtered	Filtered
A0A0D3A3S3	318916	200024	224362	Filtered	30912.1	Filtered	247066	Filtered	158967	123024	45459	158802	65297.9	78204.8	140851	76254.1	90644.3	124579	175450	142893	59005	132956	106305	35774.6	102876	105806	52954.4	82325.1	56960.7	164493	45306.4	53821.1	59441.1	30921.1	131559	94192.1	46668.9	30769.6	74658.1	183133	409520	238190	144197	255207	427621	Filtered	409991	495968	93450
A0A0D3A3S7	221235	279115	Filtered	172369	193694	280497	179559	160376	61402.3	103881	132851	49361.4	147852	399008	38147.2	526208	529639	122431	404049	458690	291469	520265	449293	574481	Filtered	Filtered	Filtered	Filtered	Filtered	Filtered	Filtered	Filtered	Filtered	128654	99731.1	148177	338067	292004	187198	246641	269708	244574	222164	425650	356238	430448	313516	491567	211062
A0A0D3A3T9	2110808	1.58364e+06	1.25945e+06	1.99007e+06	1.97112e+06	2585364	1286599	2500185	2.04781e+06	1.71504e+06	2.35458e+06	1665913	1568222	2.04479e+06	1.21992e+06	1635564	1.06327e+06	1.01905e+06	868862	1095341	898260	1.13953e+06	1.10439e+06	1253444	1.92721e+06	1.05903e+06	1.47623e+06	1.63918e+06	1678432	947635	1.5938e+06	1.48847e+06	1.22625e+06	2666017	1.94958e+06	1.36583e+06	1.968e+06	2.34969e+06	2.00533e+06	2534439	1920196	1.29816e+06	1.69019e+06	2.0219e+06	2.20803e+06	2.20666e+06	2.31032e+06	4.00347e+06	1.62069e+06
A0A0D3A3V8;A0A0D3CDP6;A0A0D3D9M9	309913	389070	82199.1	252545	144741	94739.2	70149.2	Filtered	266210	99984.9	141428	36508.8	29954.3	100383	87912.7	91608.8	98155.9	66516	58065.6	51214.1	56614.4	107112	119765	125508	151163	1	122327	Filtered	135980	71920.1	92845	136428	55700.3	223409	150471	68856.8	213170	148177	211715	171964	Filtered	127842	353523	383205	396919	368441	443361	335564	142912
A0A0D3A400;A0A0D3D9H7	Filtered	172285	419531	6167.21	30471.2	Filtered	149474	26767.4	Filtered	267059	3319.12	335282	369880	77536.5	389020	365690	253147	366281	299901	374432	385299	134054	234362	194714	25731.3	246397	33786.2	290926	125523	321889	168842	269683	194137	40313.2	66421.9	263280	104515	Filtered	237938	103785	136092	123469	211572	Filtered	168714	198801	81759	Filtered	165829
A0A0D3A402	Filtered	10835.7	248.208	Filtered	1	Filtered	19450.3	2076.99	190611	69365	117561	58802.4	78001.9	73421.7	54814.9	41894.2	99915.3	10941.5	61991.5	49925.2	68213.7	87058.5	112328	140054	119954	43612.2	75719.6	69143.1	78468.1	2021.28	85257.1	104818	5158.38	96587.2	54203.2	35069.2	89750.5	47872.1	68104.6	74651.9	12001.2	9961.48	16001	11535.6	21593	Filtered	6604.15	25178.1	47491.5
A0A0D3A427;A0A0D3C264	Filtered	Filtered	43178.5	Filtered	Filtered	Filtered	Filtered	Filtered	Filtered	23634	Filtered	Filtered	Filtered	Filtered	Filtered	Filtered	6070.89	12528.7	39108.8	Filtered	52203.8	22775.7	Filtered	Filtered	Filtered	18515.6	Filtered	Filtered	25843.1	23254.3	Filtered	12585.8	42399.2	25260.3	Filtered	Filtered	33282.3	Filtered	7995.94	Filtered	Filtered	48967.7	71861.3	Filtered	Filtered	Filtered	Filtered	Filtered	64079.9
A0A0D3A467	283053	292846	315345	274348	256599	732863	175318	383733	80693	47087.2	185513	43366.6	32560	131868	56613.6	112121	76593.9	71638.4	35126.2	30199.5	43909.1	143256	70730.2	70460.7	241852	100401	180263	133703	226657	92884.5	142439	270307	70866.6	177694	189667	46913.3	133876	145847	142990	169825	123125	189398	140965	260047	116953	306043	191474	202048	76846.5
A0A0D3A4C6	Filtered	18927.4	41918.6	19178	17024	111330	Filtered	24530.8	85263.4	78418.1	40423.9	85142.4	75249.9	22847.4	50208.1	54783.2	67361.3	79667.4	85513.6	76277.8	84088.9	74676.1	70849.7	72677.3	78087.7	87462.1	68717.2	94660.4	62232.7	102141	77630.7	108715	24020.2	41114.6	25887.6	54720.7	62324.8	54512	31593.3	38571.7	70983.7	95442.8	71021.5	63121.5	129695	64695	90369	107165	71379.7
A0A0D3A4H5	Filtered	Filtered	Filtered	Filtered	Filtered	Filtered	Filtered	Filtered	26370	25828.8	Filtered	6081.84	Filtered	Filtered	3212.43	Filtered	Filtered	15948.1	13396.8	15559.7	21898.7	9347.18	Filtered	5116.01	3361.71	9381.37	10988.8	4383.69	3313.84	22088.9	47608.3	10655	11359.6	9830.16	8348.56	13683.1	4422.48	Filtered	Filtered	Filtered	Filtered	9212.58	Filtered	Filtered	Filtered	Filtered	Filtered	Filtered	19306.3
A0A0D3A4J4	33391.3	48316.2	37631.7	40669.1	16606.4	54122.7	30627.3	30551.5	121215	37512	74724	65907.5	52859.6	94265	43223.4	80131.7	54307.9	48250.3	24918	29327.5	18036.8	50335.7	38283.6	58583.8	94625.6	49512.7	81574.7	105879	75195.9	64608.6	65651	56938.5	36672.9	40585.7	88250.6	38815.3	33960.5	62809.2	69115.3	79881	30038.7	39083.6	36497.2	55972.6	59533.6	34125.2	37722.2	64586.6	13530.8
A0A0D3A4K8	258997	231851	153338	156247	127932	1.05941e+06	335639	172162	423534	42921.7	104780	78461.9	105739	161003	115931	239560	315422	266189	186398	206203	304647	351539	268581	230332	400410	359568	428078	233951	382124	311975	255241	535019	405235	441100	370066	225188	511343	337912	365955	413303	129773	148292	162618	189584	338721	219750	318025	224592	234747
A0A0D3A4L7	1.95894e+06	1.36858e+06	1.33415e+06	1.78038e+06	1568637	1.81227e+06	1.36843e+06	1142897	863545	763644	929884	513155	710211	709642	778612	844180	796416	731032	702591	746332	839627	968471	941994	861265	1.11432e+06	820964	1.03838e+06	873094	648011	956893	1133141	1064011	915080	895602	1.07743e+06	772251	1.08483e+06	1.16351e+06	1.02363e+06	735325	1.14855e+06	1.2472e+06	1.47665e+06	1.20436e+06	937737	1.63416e+06	1.54815e+06	1.64829e+06	639478
A0A0D3A4M4;A0A0D3BKM5;A0A0D3DF66	Filtered	25109	47840.5	34996.5	33962.6	105758	35409.8	37054.1	130225	89850.1	41553.6	47229.8	40439	37730.2	46474.6	25409.6	33805.8	40979.4	31338.4	32199.8	37455.3	30163.6	39211.7	31361.7	20905.4	27842.5	26214.5	34943.1	20064.8	39041.2	37498.2	16086.5	25602.4	22750.7	27783.4	36233.9	16654	29598.1	28291.6	28760.7	29849.1	36306.7	20621	23468.9	38264	10876.7	31129.9	33321.1	16731.6
A0A0D3A4N8;A0A0D3AU29;A0A0D3BFN8;A0A0D3BGJ7;A0A0D3BKN7;A0A0D3BS15;A0A0D3D8X0;A0A0D3DD91;A0A0D3DF75;A0A0D3E6G1	18837.4	7800.17	25319.5	Filtered	Filtered	1181343	165024	Filtered	223977	142714	Filtered	14731.7	4334.97	Filtered	2933.33	15671.3	5758.38	Filtered	7995.9	Filtered	9592.55	5545.26	Filtered	Filtered	Filtered	18935.6	3059.72	25952.2	7699.82	25206.8	99777.5	12176.4	12853.4	Filtered	Filtered	1642.03	27902.7	Filtered	Filtered	Filtered	6876.89	17820.4	19525.6	16995.1	Filtered	976.756	70045.6	Filtered	13569.6
A0A0D3A4T4	18412834	21697952	6.83973e+06	18910568	7941500	25576976	11977289	31341300	12155046	4.11837e+06	7.75961e+06	4359592	4517330	9070256	4938322	8284889	7.4779e+06	4.31637e+06	4703623	4.2049e+06	5341023	7.82208e+06	8.07353e+06	7643276	8461002	6238212	8921697	6.43238e+06	8.02054e+06	5.589e+06	6205169	10662963	4.95785e+06	7.82197e+06	7.66024e+06	5.61927e+06	9430428	6290178	8740131	5723440	18734148	16769386	24237858	21770924	24544156	23682606	32527286	33045708	10189821
A0A0D3A4X4;A0A0D3BNV5	Filtered	15961.7	22800.8	Filtered	Filtered	17974.2	23006.1	Filtered	Filtered	37877.5	Filtered	33291	49587.8	Filtered	40684.9	21817.4	28327.8	44891.5	56841.3	61435.3	58660.4	32209.3	29590.8	33082.7	14221.8	25166.3	Filtered	27400.7	7902.93	34369	20104.7	Filtered	41509.5	17123.6	21510.4	47634.1	29998.9	33455.1	21992.3	11623.5	19673.3	30650.8	Filtered	5730.13	3927.12	7704.06	20000.3	Filtered	32598.3
A0A0D3A4Z4	383343	Filtered	1	313364	280184	Filtered	155201	179679	502229	61144.7	487698	Filtered	131120	375112	166745	186379	15883.6	106582	13855.4	118233	133474	99121.1	116816	153167	130990	268095	1	92677.6	193693	93222.8	155058	363621	135715	105159	141349	87399.6	78751.3	324003	92697.2	143545	202826	289586	190804	115410	89045.2	120884	183254	296738	106797
A0A0D3A545	79401.2	117654	26228	99893.1	99112.6	Filtered	54373.7	150239	81422.9	57866.1	44071.4	67955.7	62534.2	101073	53584.4	111360	61644.3	9932.98	43563.1	24273.5	9749.71	95796.3	12341.1	76725.5	109138	73483.9	100048	136648	118269	10101.4	39654.1	79306.1	42571.1	65354.3	100154	25996.6	96357.9	105801	81760.2	57243.6	189720	120860	238758	264813	238900	312037	166110	238001	59811.7
A0A0D3A553	17513.5	20780.6	13618.3	12114.8	11419.1	16307.9	22497.7	20348.4	73845.1	54392.4	71347	60126.6	75940.8	81377.5	52181.8	43386.2	47361.7	57239.3	56701.5	58656.9	38212.6	39693.2	34145.8	46722.6	49879.6	34834.5	36093.3	44195.5	39137.8	28846.6	44459.7	38655.2	37723.7	46193	29851.1	31732.2	36341.9	48910	37987.9	44043.7	11709.8	20290.4	7996.35	12148.6	23964.1	4073.4	9123.68	27374.9	6616.21
A0A0D3A556	Filtered	Filtered	Filtered	Filtered	Filtered	Filtered	Filtered	Filtered	Filtered	15725.5	17162.4	21547.7	27276.1	Filtered	22794.5	37690	17424.7	19954	2655.03	19635.7	11583.3	24550.3	Filtered	1	Filtered	11719.9	20399.5	16071.6	22167.2	15882.7	23144.6	Filtered	3115.11	5352.9	31075.2	5001.08	2057.71	2459.44	9221.62	1	Filtered	Filtered	Filtered	Filtered	Filtered	Filtered	Filtered	Filtered	1
A0A0D3A585	220834	259079	78031.1	100749	304714	138610	472716	488378	337632	150598	274803	274100	226280	879778	296228	477488	290374	161608	198690	141939	148807	335005	217295	149281	470802	273350	313294	577128	333293	369719	280158	428554	231640	390562	154617	187519	338054	505015	310062	512027	381344	328607	285917	475470	527988	423978	352664	697294	169129
A0A0D3A5B7;A0A0D3DFI2	Filtered	Filtered	Filtered	Filtered	Filtered	1716.77	Filtered	Filtered	15130.2	1563.82	Filtered	1	1	Filtered	1	Filtered	1	1	925.924	1	1624.78	1	1	Filtered	Filtered	1	Filtered	1	Filtered	1	4065.81	Filtered	1	1	Filtered	1	1	Filtered	Filtered	Filtered	Filtered	Filtered	Filtered	Filtered	Filtered	Filtered	Filtered	Filtered	224.404
A0A0D3A5E9	11801.8	Filtered	Filtered	57436.6	Filtered	Filtered	Filtered	Filtered	75413	Filtered	130883	Filtered	8701.1	Filtered	Filtered	48994.5	27587.7	51443.6	8729.69	Filtered	Filtered	14360.3	21668.9	Filtered	Filtered	Filtered	Filtered	Filtered	Filtered	15530.9	Filtered	Filtered	Filtered	Filtered	Filtered	Filtered	Filtered	Filtered	Filtered	Filtered	32491.7	268941	142905	200858	640615	166924	58078.6	89111.7	Filtered
A0A0D3A5F0;A0A0D3DFK1	Filtered	Filtered	43954	Filtered	Filtered	84632.1	Filtered	13732.2	25420.6	61845.2	Filtered	28730.4	34117.3	Filtered	17935.6	16327	18347.9	34076.1	55131.8	59281.4	65858.5	19107.5	Filtered	10495.1	Filtered	Filtered	11467.8	6377.19	Filtered	45056	63788.5	Filtered	20460.6	Filtered	Filtered	45125.4	Filtered	Filtered	Filtered	Filtered	Filtered	43683.3	11492.7	Filtered	Filtered	Filtered	15508.4	Filtered	36326.3
A0A0D3A5F5;A0A0D3A5I2	308427	430294	164390	298214	222265	396476	267322	351472	246162	26130.2	251239	90981.9	96316.4	134240	94820.1	194128	165044	77423.5	124374	97835	50123.6	162886	193067	178907	176518	67670.7	174290	76827.5	103941	71727	80730.7	86297.1	314690	421768	232693	166010	592268	329725	330422	476332	258388	219075	382776	452177	555128	474516	345814	412870	287351
A0A0D3A5J6	22027.9	18330.5	58546.9	Filtered	29756.8	275344	23428	1	86053.6	87707.8	11072.2	44731.9	51801.9	13156.5	57023	13113.8	25731.8	57670.8	126414	97175.7	193859	25008.9	39081.7	31988.9	10391	57087.6	14270.3	38546.7	8233.48	76086.5	86059.3	28364.5	36436	8325.3	39721.5	85962.2	18703.4	16384.6	14996.8	26058.5	53407.8	27909.4	Filtered	Filtered	5274.7	Filtered	13611.9	7422.63	78534.4
A0A0D3A5M6	Filtered	Filtered	Filtered	Filtered	Filtered	Filtered	Filtered	Filtered	32465.4	44877.5	Filtered	Filtered	Filtered	Filtered	Filtered	Filtered	Filtered	Filtered	Filtered	Filtered	Filtered	Filtered	Filtered	Filtered	Filtered	Filtered	Filtered	Filtered	Filtered	Filtered	Filtered	Filtered	Filtered	Filtered	Filtered	Filtered	Filtered	Filtered	Filtered	Filtered	Filtered	Filtered	Filtered	Filtered	Filtered	Filtered	Filtered	Filtered	Filtered
A0A0D3A5N4;A0A0D3AC23;A0A0D3CI00	271786	168793	198773	243746	258227	125884	252628	188244	440144	107242	242250	140619	139542	251085	180565	75694.8	156891	149412	226229	158603	125369	144393	157197	189866	262075	188610	165187	160525	49912.2	75368.5	87109.9	95953.1	356263	164010	381060	177809	129923	264937	173405	81927.1	138851	62300.3	161236	159590	212080	50625.8	109425	296404	191149
A0A0D3A5P0;A0A0D3DFP5	186482	186018	261072	230636	366510	561296	251719	211495	34749.3	386088	245030	382394	423213	251558	396530	158936	285651	457782	423540	509317	554327	238856	301298	269131	201385	305432	256145	491799	300601	393708	123308	235486	316973	191767	144681	423576	157134	129845	224910	140611	480926	431352	263971	280087	328717	252096	313242	256834	470667
A0A0D3A5P5	Filtered	Filtered	Filtered	Filtered	Filtered	Filtered	Filtered	Filtered	17422	Filtered	Filtered	1	Filtered	3813.41	Filtered	2561.37	Filtered	Filtered	Filtered	Filtered	Filtered	Filtered	Filtered	Filtered	Filtered	Filtered	Filtered	Filtered	Filtered	Filtered	Filtered	Filtered	23616.7	14944.1	Filtered	Filtered	30169.4	4879.46	Filtered	Filtered	Filtered	Filtered	Filtered	Filtered	Filtered	Filtered	Filtered	Filtered	Filtered
A0A0D3A5Q3	Filtered	13715.9	Filtered	Filtered	Filtered	Filtered	Filtered	Filtered	Filtered	1948.56	1286.88	4755.53	3173.6	Filtered	3536.02	3767.03	10686.1	10377.1	5817.69	2423.53	3194.17	10935.4	10012.2	4263.96	12283	11844	4668.74	10207.8	13903.6	Filtered	10162.4	17310	9454.25	8393.83	13328.7	1270.41	1948.49	7675.51	11925.2	9629.69	Filtered	Filtered	11267.7	Filtered	Filtered	10809.9	Filtered	1.14306	Filtered
A0A0D3A5R9	2347897	1.57627e+06	1.03872e+06	1.66705e+06	1.12026e+06	994062	850607	1.47889e+06	1.07144e+06	508419	1.34813e+06	641178	777046	1.37901e+06	773369	1.35109e+06	552277	639301	322563	252139	421347	787758	546466	607853	1.57208e+06	1.02041e+06	1410393	923793	1.03978e+06	1140206	1.01356e+06	1452866	922992	1.28216e+06	1.31402e+06	728219	1322705	1.20287e+06	1259463	1.54462e+06	996894	800320	1.11297e+06	1330345	1.14279e+06	569469	1.53721e+06	1.96339e+06	852209
A0A0D3A5U4	60760.4	38534.7	25465.2	52199.1	29574	27075.6	19039.3	41466.9	25607.2	15117.8	13274.8	16774.8	18029	19129.6	13969.2	18080.2	12712.2	16676.8	18562.1	16523.8	16155	22253.4	30881.1	23715.6	30966.9	14776.3	24824.7	24847.9	23121.5	21257.6	22166.8	21395.2	13486.8	16067.2	30429.2	16595.7	28889.2	22431.3	18902.9	26705.1	22609.4	20137.8	19637.4	27804.2	26874.7	8624.28	27419	36145	24151.4
A0A0D3A5V9	654572	751171	640597	716859	477943	759177	677452	544589	301220	225469	347595	201490	290995	230752	225315	250706	255612	273022	202024	208595	215669	233952	234951	280515	311717	253264	368199	283250	206967	310017	347240	261998	258842	335578	351582	250198	189912	324784	369492	242882	596248	576425	694534	810081	807421	675952	747500	1103186	308440
A0A0D3A5X3	131539	104035	84181.7	117486	140934	120961	57520.9	Filtered	Filtered	51641.5	85656.6	62890.3	73445.9	25224.9	52003.9	33837.3	27108.2	65145.2	51798.2	65915.7	40346.6	32189.4	55688	22267.2	56508.1	39880.1	23453.7	59791.8	Filtered	63182.8	49091.6	64965.1	13857.5	47120.9	25138	22475.7	19909.9	46303.2	80217	31701.5	75959.5	41432.9	Filtered	Filtered	45671.1	40778.9	Filtered	98448.4	29540.8
A0A0D3A5X5	425996	245589	651994	267777	812492	377772	849985	271174	785651	293186	626070	595730	478460	814615	704582	583090	518093	547871	788466	948012	542513	661154	626256	564422	474273	644850	498210	453886	384706	652802	407338	453570	556922	226952	470140	579372	651404	330285	308098	409378	253032	301855	257211	1.79429	128451	227129	276975	309820	450938
A0A0D3A615	48961.7	25385.8	45476.2	43495.9	39860.1	24818.3	61900.9	45297.5	33507	51904.8	101318	62610	72633.6	94587	44248.7	94604.2	64089.4	46108.4	51857.4	50150.2	47454.3	79450.1	68958	73968.5	87453	49840.5	61610.5	68706.7	68539.4	50484.2	75658.2	84406	12200.4	9097.25	16653.4	18341.7	21059.1	55288.9	35420.1	27844.9	31093.3	7314.82	25475.7	33737.5	42752.6	34150	37998.9	41892.2	45164.6
A0A0D3A622	27662538	12142583	12276365	21783812	23408326	28508580	15573651	21661870	4237842	2.95911e+06	7271961	4396742	5.3571e+06	8898103	5341515	7.91093e+06	7086477	4858096	3.96668e+06	4680608	3.98699e+06	7947883	6.04267e+06	7237686	8390048	4.91921e+06	7906695	5578575	7531551	5.40891e+06	6.71848e+06	7473650	4883111	9630628	7.35295e+06	4.59617e+06	9577848	8.35194e+06	8681500	11418688	11691772	8580362	16811094	21021588	20769652	18359570	20955112	24130828	5712970
A0A0D3A630	Filtered	61960.3	35540.2	25560.4	Filtered	Filtered	Filtered	113808	62923.3	23621.8	143483	80037.5	71938.3	132717	92906.1	69332.8	37911	46926.8	77134.4	62923.1	29238.7	71605.8	52062.3	33498.1	55236.4	38050.4	50880.9	51045.4	67951.6	24076.3	44745.2	8413.22	85886	48367.3	84962.5	49547.4	91561.8	105276	70937.3	89279.1	41258.1	11521.8	33883.2	100953	54927.6	11059.9	1	55639.4	43014.6
A0A0D3A656	Filtered	Filtered	112943	Filtered	Filtered	591320	Filtered	Filtered	1.53047e+06	1.62569e+06	2559018	3.33242e+06	1988312	3.28788e+06	2.22999e+06	1.74238e+06	2.17532e+06	2.56885e+06	1.40565e+06	2.38153e+06	2.7796e+06	1.71244e+06	1.32339e+06	2.37609e+06	2266495	2.89793e+06	2.17794e+06	2.01096e+06	2.58826e+06	2.42479e+06	1.48381e+06	1.43958e+06	1570728	1.85424e+06	2106624	2.11002e+06	1.35631e+06	1.99271e+06	2.25367e+06	1.62084e+06	381033	Filtered	Filtered	Filtered	Filtered	Filtered	Filtered	Filtered	1.55859e+06
A0A0D3A658;A0A0D3DFZ4	152791	Filtered	168535	98258.8	267524	61175.4	139191	52778.2	283942	236049	191205	165453	204463	185801	163006	182565	122198	175529	213883	419293	191128	171639	156678	276448	138030	182355	256873	190765	67169.5	268598	262018	258018	346416	143359	97112.8	182640	144570	226019	96600.1	133290	181592	312154	208606	162736	Filtered	227152	106495	313675	195205
A0A0D3A662;A0A0D3DFZ9	11261	86939.4	128722	6299.12	172336	551562	27685.1	Filtered	251368	106900	40503	60322.6	75375.2	5874.28	64333.4	53813	11561.2	89134	90199.6	110530	42867.7	48958	53470.1	35862.3	71993	113040	100802	54865.7	44412.5	187500	221915	29468.4	44616.8	106476	176906	159194	74877	261157	69995.4	218850	48718.6	137035	27307	31400.4	34823.6	55934.4	118526	34726.4	133021
A0A0D3A664	2.24975e+06	910681	1.06337e+06	2.45737e+06	1.42613e+06	657812	955937	1.0403e+06	306083	235571	324378	245056	154493	253804	182004	477550	394440	419304	145842	215216	191488	310402	271753	444112	668658	420227	1.33054e+06	712363	495862	631539	227986	477257	299426	1.0577e+06	522992	215124	431875	220572	603528	790173	978354	529496	867175	891226	1430978	1.19455e+06	1.59043e+06	1.82157e+06	298880
A0A0D3A6D6;A0A0D3DG52	2.34375e+06	2189765	1.89066e+06	1.29715e+06	1.70879e+06	2131348	2.37543e+06	2686461	2.53382e+06	962022	1.52845e+06	1.51644e+06	1.59418e+06	2.31805e+06	2.49899e+06	1.35772e+06	1.28108e+06	2.17873e+06	1.34626e+06	1.76602e+06	1.43718e+06	2441076	1.40778e+06	1.61981e+06	2395455	787417	1.43255e+06	2392549	1.24383e+06	1.38288e+06	1.22067e+06	1.50235e+06	2291291	1.50566e+06	1.46925e+06	1852795	1928634	2.6249e+06	1426081	1.19496e+06	1.67125e+06	1.91401e+06	1.31645e+06	1.75376e+06	1.68926e+06	2.05345e+06	2.23483e+06	2.33372e+06	1.71782e+06
A0A0D3A6I4	61263.4	52584.1	63065.1	79560.3	101286	Filtered	137753	85697.4	285678	63639.2	27884	45188.1	57580.2	46036.1	18328	79993.9	10781.7	53209.7	40219.7	49876.2	31502.1	8984.32	44124.8	15927.8	83471.6	78456.8	24001.6	135447	71016.8	70699.9	79121.9	7511.09	63952.9	16241.7	12162.3	104516	17679.5	14960.7	99518	69041.5	160019	173732	134587	158848	91117.5	182273	12056.5	160445	98867.3
A0A0D3A6M8	Filtered	329350	159095	28665.6	45720.2	343135	Filtered	Filtered	119073	87493	114349	78752.2	47802.5	Filtered	107578	68024.7	79350.3	69269.7	77245.9	126565	82149.2	107704	73755	104937	84488.8	110260	105327	105458	79230.6	94052.2	66417.1	377268	80551.2	161100	Filtered	74403.5	190991	159658	54821	Filtered	655181	385664	479420	463657	Filtered	297448	1076077	Filtered	91265.8
A0A0D3A6M9	1.74073e+06	551860	447454	557293	1.30067e+06	986090	622139	416221	164098	128791	213598	304523	457328	356026	172180	397130	212913	224249	154602	156003	198895	225212	229358	248245	94540	135054	261086	273970	94419.7	187576	186721	283761	93676.7	143305	133897	79536.9	181134	331638	97614.4	306171	804945	589311	600265	437770	640057	758272	968696	1.11312e+06	151470
A0A0D3A6P6	Filtered	2005.16	32707.6	Filtered	Filtered	25809.3	39312.1	Filtered	55190	21733.6	6317.75	27339.7	19561.5	14664.8	20936.6	8828.33	5849.65	15795.2	24213.7	7474.25	8798.99	2337.72	13387.8	2639.66	18106.9	14561.2	3957.37	Filtered	12676.2	Filtered	Filtered	13577.4	Filtered	1	Filtered	36371.3	17830.2	19091.5	10319.8	25593.5	2834.42	Filtered	Filtered	44003.1	Filtered	Filtered	40712.9	Filtered	71965.9
A0A0D3A6Q0	Filtered	Filtered	Filtered	Filtered	Filtered	Filtered	Filtered	Filtered	3359.27	1	Filtered	Filtered	Filtered	Filtered	Filtered	Filtered	Filtered	Filtered	Filtered	Filtered	Filtered	Filtered	Filtered	Filtered	Filtered	Filtered	Filtered	Filtered	Filtered	Filtered	1673.63	Filtered	Filtered	Filtered	Filtered	Filtered	Filtered	Filtered	Filtered	1	Filtered	Filtered	Filtered	Filtered	Filtered	Filtered	Filtered	Filtered	Filtered
A0A0D3A6S3	2.10744e+06	1.2423e+06	702060	983236	898506	880673	830421	1.49791e+06	537206	289348	685561	446005	381910	904858	333525	582827	376242	318130	260537	260584	285554	512097	401142	460630	660297	410486	496800	414960	695140	356802	485859	608382	441807	512064	454526	409883	595975	651767	632205	696978	762956	746766	758926	1.14886e+06	1.13457e+06	844637	1.01972e+06	1.67179e+06	473730
A0A0D3A6T1;A0A0D3DGC3;A0A0D3DN33	Filtered	Filtered	19716.2	Filtered	Filtered	Filtered	5215.5	Filtered	795.388	6555.89	3862.18	10943.2	Filtered	Filtered	Filtered	3426.09	848.5	Filtered	15574.7	11433.3	Filtered	Filtered	Filtered	8765.45	Filtered	9908.95	5751.11	23546.2	6883.25	2273.03	Filtered	Filtered	24536.5	Filtered	Filtered	4522.23	10209.3	Filtered	Filtered	Filtered	Filtered	61798.1	19907.5	34397.5	Filtered	30807.8	9314.57	Filtered	Filtered
A0A0D3A6T9	Filtered	Filtered	Filtered	Filtered	Filtered	Filtered	Filtered	Filtered	Filtered	Filtered	Filtered	Filtered	6636.36	Filtered	Filtered	Filtered	12377.5	18020.1	14838.5	16985.8	16478.4	17398.9	16654.8	14703.4	13556.3	14827.5	14535.2	11187.5	9272.66	18635.9	11420.8	12233.7	Filtered	5031.44	8504.54	4984.46	5304.02	Filtered	10551.4	8584.68	Filtered	Filtered	Filtered	Filtered	Filtered	Filtered	Filtered	Filtered	9289.92
A0A0D3A6W8	149227	85360	139121	134909	79613.5	Filtered	Filtered	Filtered	106246	93264.6	81838.3	67116.4	78222.5	99686.5	56917.4	95963.7	59504.6	103506	83576.8	97660.2	120388	84371.4	54206.4	93843.3	76257.7	96926.3	118366	146811	94489.2	155880	90848.9	124457	78135.4	69137.4	95025.7	76687.2	61555.4	51956.6	108578	77175.9	125441	124125	135569	157642	89956	103815	164641	179540	71955
A0A0D3A6X7	5836.85	3181.07	1037.28	6369.78	Filtered	Filtered	Filtered	4379.48	6236.16	2565.37	5645.52	4514.6	3853.28	6868.1	Filtered	3679.52	2289.02	Filtered	2899.76	2481.35	Filtered	6091.25	1843.2	3624.48	1714.41	Filtered	Filtered	1830.81	2508.05	Filtered	3351.41	3173.67	1212.19	3139.87	3387.67	1564.51	4663.44	12512.9	4091.7	7471.08	Filtered	Filtered	Filtered	Filtered	Filtered	Filtered	Filtered	Filtered	Filtered
A0A0D3A6Y1	99120.7	155014	32162.1	111675	162439	157357	158810	143758	50969.5	60911.5	128112	72614.9	73082.7	74932.2	75173.1	57482.5	85424.6	71513.2	42650.9	64741.4	63533.7	87072.2	90504.4	98014	53087.8	68406.2	91977.8	78062.9	90134.2	40730.2	62664.6	83007.2	64598.4	68173.9	61303.1	70532.9	56975.3	97311	111025	82653.3	164134	76230.6	154126	178110	131832	224840	431549	171657	37681.3
A0A0D3A6Y3	Filtered	17198	Filtered	Filtered	Filtered	1.03434	Filtered	19017.4	169284	47426.6	46615.7	59329.3	30134.7	Filtered	41111.9	40852.5	29725	53322.7	86417.3	106237	32839.4	42625.9	35073.5	34147.2	56018.8	53846.3	20808	34853.2	33415	18619.9	57095.1	47550.2	18398.4	23154.5	10002.7	27396.2	60738.5	45166	39098.3	52149.5	Filtered	Filtered	5990.82	9755.77	Filtered	Filtered	Filtered	Filtered	41706.1
A0A0D3A6Y4	312007	194183	170094	249769	Filtered	422199	153613	164472	343530	116965	Filtered	67981.6	104852	50675.2	130932	103377	140787	245608	262035	155700	251098	194347	145398	123520	200707	178459	203989	175426	26856.8	170181	231653	Filtered	183167	158001	235370	221336	59315.1	134022	147612	162199	159957	161904	112129	58951.1	110184	120194	Filtered	28353.6	227197
A0A0D3A6Z4	202004	204710	279138	208937	300357	1.21319e+06	238953	286733	390942	323681	553866	351560	408055	388168	413814	389980	343769	309060	283866	323206	345222	338958	327295	418299	498783	380854	415009	374046	247647	359332	255908	291209	303922	216703	372856	195064	289746	277621	235142	320863	242495	187865	209308	287634	329933	153334	357720	538197	267291
A0A0D3A6Z8	40962.9	120759	176917	259576	212627	506323	204850	231739	167315	221684	362452	246458	267470	340748	204861	284735	244963	283728	206299	226877	189935	287404	288128	266512	382612	318952	408492	344739	317622	329801	321863	297422	182638	374874	355262	311329	414859	394408	405409	436467	242714	121153	140158	239661	201394	59831.1	165698	201774	400741
A0A0D3A747	64883.3	51300.3	39300.1	55148.2	54338.7	78589.5	69338.8	64612.6	91278.2	41333.4	69352.3	38762.5	70108.1	54025.2	29080.3	38183	54982.5	43139.1	55978.3	46744.8	48908.6	64116	66682.5	66581.7	56056.2	38178.4	35717.8	39930.6	59389.4	28476.3	69294.1	52743.1	45379.3	Filtered	43790.1	56595.8	83771.1	69762	66251	42398.1	55391.7	56084.7	51274.4	64931.6	74135.5	42910.9	59805.1	91838	32922.3
A0A0D3A7F3;A0A0D3DEI9	556146	59520.9	355220	209532	339460	462211	358521	303256	108023	206029	140337	253714	200711	219626	257389	211540	214423	227469	311076	245695	347455	248356	237211	151317	168187	202787	187351	207987	153575	139720	141082	166488	208170	116328	204198	309967	229066	164724	149019	177892	362293	333714	163194	248351	117224	238422	323397	217264	230293
A0A0D3A7G2	935772	506184	394833	714128	553217	705923	355647	660174	570450	604180	1.06769e+06	648232	749734	1.02113e+06	511710	822248	380845	402824	357976	435259	255505	388021	357091	447387	635430	358698	550561	566033	581357	355876	607982	500096	270885	342506	410526	316336	404420	577066	407041	524986	435092	245542	305661	428830	433851	369740	401474	574010	294214
A0A0D3A7J8	Filtered	1	35.2042	Filtered	Filtered	Filtered	Filtered	159.756	40.7999	Filtered	1	Filtered	Filtered	Filtered	Filtered	Filtered	194.05	1	49.7986	Filtered	1	1	Filtered	128.071	Filtered	Filtered	Filtered	Filtered	Filtered	Filtered	Filtered	Filtered	153.21	593.037	281.186	1458.46	394.75	Filtered	Filtered	1322.46	Filtered	Filtered	Filtered	Filtered	Filtered	Filtered	391.638	Filtered	1396.57
A0A0D3A7U0	Filtered	Filtered	2359.04	Filtered	Filtered	Filtered	Filtered	Filtered	2146.12	832.256	4036.38	Filtered	3626.56	1.05671	1045.63	2609.57	5918.62	2304.47	5151.32	2826.19	6254.9	5985.88	5356.49	5876.81	Filtered	646.085	Filtered	Filtered	500.196	1274.83	Filtered	Filtered	6710.27	4197.5	4249.55	4650.53	5130.14	5920.08	7271.41	5372.13	Filtered	2819.42	Filtered	3345.55	Filtered	Filtered	Filtered	4213.67	7036.11
A0A0D3A7U1;A0A0D3DEA2	1.23747e+06	609956	471695	942425	1.10923e+06	894191	808602	1.12274e+06	1.74248e+06	281583	508664	251371	464366	232636	169820	191914	226968	243245	132628	195261	236524	254182	162646	153755	206190	158532	326814	134483	215983	147201	114221	109020	236418	317684	241116	223295	443826	307121	208354	339567	297650	470490	317299	202070	358292	968808	426134	460393	269945
A0A0D3A7U2	85262.3	114369	93213	34583.8	47034.1	142061	90604.4	83034.9	208595	43551.5	109881	129345	104108	201435	93736.5	74605.8	33737.8	81234.9	76907.5	1	53844.8	74477.3	59119.5	62220.3	67187.2	62378.3	32803.5	58316.1	104244	1	46542.1	83406.8	54131.4	58815.5	60798.9	60627.6	71505.5	54632.6	102194	113746	Filtered	1	41967.1	44177.9	87897.1	40602	37553.3	108593	105053
A0A0D3A7W8	2.36885e+06	1.59038e+06	1.4403e+06	1.58548e+06	1.6388e+06	1.67896e+06	948682	1.99345e+06	918408	322302	878708	441560	496037	865240	536899	699411	716390	504787	451089	467272	448908	813610	719093	747396	1.01353e+06	621049	971903	539906	865760	647422	703269	990438	558404	1131268	1.01065e+06	622586	1.04172e+06	1.12359e+06	1.07227e+06	1.21996e+06	709594	721909	1.13824e+06	1.25352e+06	1.42855e+06	1.25015e+06	1555660	2043285	754764
A0A0D3A828;A0A0D3ABM1;A0A0D3DLW3	Filtered	132347	222661	73330.5	159625	322721	162250	88782.8	347825	294452	82281.1	206435	183091	82199	127378	78134	97901	134098	192269	205486	192827	138389	85296.1	80629.7	85650.5	113529	118962	217608	101095	268091	249280	70877.5	105270	60697	85746.4	138130	69945.5	52499.7	85135.2	103775	179873	345786	58213.7	109970	94667.2	41688.5	93216.2	Filtered	241341
A0A0D3A838	484826	201013	220439	265777	373864	530273	322732	374554	994304	96693.1	289614	141423	104177	338909	135072	185294	147265	157017	143878	172235	188601	178075	180977	152989	191336	178324	248104	158893	219923	167609	192570	196788	277502	217328	235500	157743	294656	260801	251661	244996	162486	180673	175588	276542	308389	186279	225931	205722	186977
A0A0D3A839;A0A0D3DLV7	Filtered	Filtered	Filtered	2040.2	Filtered	Filtered	Filtered	Filtered	69262.7	Filtered	Filtered	Filtered	Filtered	Filtered	Filtered	1	Filtered	Filtered	1	Filtered	Filtered	Filtered	1	Filtered	1	Filtered	130.849	Filtered	Filtered	Filtered	Filtered	Filtered	Filtered	Filtered	1	Filtered	Filtered	Filtered	Filtered	1	Filtered	Filtered	Filtered	Filtered	Filtered	Filtered	Filtered	Filtered	Filtered
A0A0D3A8A4	7713.18	8002.71	18408.1	9745.83	14815.5	12255.8	8474.38	12165.7	43010.1	8610.85	14673.3	8442.41	6947.57	11308.3	8478.6	10214.4	7095.38	7082.07	7125.8	11643.9	10044.1	9192.99	10384.2	7754.91	11168.4	4706.08	12538	8479.06	10156.4	5942.84	9665.27	12623.7	10208.7	11750.7	17600.9	11234.2	13518	17879.7	12196	18576	13653.8	7670.05	8405.08	6998.21	13634.5	11328.5	12532.4	28347.7	8789.75
A0A0D3A8H2	8147861	12803071	10822426	9578044	18572268	15243988	9125768	21037178	3.27053e+06	1.90489e+06	4046523	1.71684e+06	2.16973e+06	4.32102e+06	2.72424e+06	6.69611e+06	6000568	3131029	5346542	2.36724e+06	3.69259e+06	7056253	5.60924e+06	5975085	5.24599e+06	9699096	13625703	8.14263e+06	13917030	3.78375e+06	10818818	23825434	5346291	4.74495e+06	2.71885e+06	690573	5.67988e+06	4.0946e+06	4541056	6.2627e+06	2.36785e+06	3.67582e+06	11353985	8438875	3.90418e+06	5814208	5518077	4906262	1.61159e+06
A0A0D3A8J3	699203	415166	726405	463075	955420	1.04388e+06	740061	563214	884608	444541	462872	370241	346751	483181	402663	401990	417506	463727	489171	528965	504565	480102	481469	518102	587852	513136	627208	515396	410575	539955	550394	443520	399389	373294	406675	429282	379069	446919	312815	465036	671911	596502	461463	466288	520433	468054	538630	475846	540003
A0A0D3A8L2;A0A0D3DDE4	1.84606e+06	684377	856036	1.33642e+06	1.55526e+06	1.57929e+06	937091	1.23625e+06	424033	272348	243232	203584	233716	320220	284658	278192	339619	281362	329819	371514	211419	434811	298157	368944	405183	315933	628458	497324	327111	582397	489374	353222	424430	631536	542592	767698	555999	789357	580444	654636	1.10007e+06	1.04906e+06	949426	1.01164e+06	719320	934923	889216	1.09193e+06	777758
A0A0D3A8L6	36314.2	22335.9	Filtered	Filtered	Filtered	Filtered	22065.9	18246.9	42564.2	17720.9	20756.2	13533.1	20688	Filtered	20131.5	24859.6	35211	29517.6	35660.4	29250	39459.2	38082.4	42158.7	46915.9	30302.8	27946.3	16443.1	Filtered	18208.1	23809.6	21239.8	36529.2	25421	46199.2	33477.7	42249.9	45496.9	36951.1	35545.4	30105.1	40807.4	26487.7	35442.3	Filtered	33590.3	33145.9	Filtered	Filtered	51679.7
A0A0D3A8U0;A0A0D3AL01;A0A0D3CKY7	1.91974e+06	860818	709742	1.10541e+06	1.24479e+06	9298394	1914567	1.9425e+06	1.91064e+06	501567	717657	421076	548220	656950	474832	475719	516276	532794	427648	530663	623387	601008	622346	740156	598571	433624	584144	459160	427845	566903	530912	634934	604772	523505	732243	462662	666856	745183	674045	754382	901117	910457	979798	1.27337e+06	1.18274e+06	1128751	1.40105e+06	2.56423e+06	591518
A0A0D3A8W2	805156	742758	343402	468034	490039	644636	306757	390648	953290	269626	466573	285782	398156	541322	422395	461981	500146	379061	407522	448218	603443	627276	652397	637782	645485	476448	550959	372170	446718	553748	614023	835437	429056	768674	758355	498680	867050	880072	748314	1413237	360214	401904	309320	356985	466856	446359	513433	664899	644733
A0A0D3A8Z0	2.12373e+06	1.16398e+06	925227	1169438	744565	1.57034e+06	1.21105e+06	1.16817e+06	1.03727e+06	384021	1.63928e+06	837777	450302	1.65791e+06	791790	1371022	817072	655106	857851	651201	520501	1.48328e+06	1.23045e+06	762133	1.65316e+06	1062157	1.1355e+06	1.21224e+06	1.35826e+06	649957	1.06873e+06	1.21792e+06	1.09756e+06	889807	905390	647919	1.35503e+06	1.3229e+06	857581	1.46925e+06	1.38543e+06	1.16909e+06	1.24268e+06	1.4784e+06	1.29972e+06	1.40484e+06	1.25662e+06	2886354	729437
A0A0D3A973	199581	83749.9	55844.1	51957.8	110218	1.2736	77084.9	74588.4	42873.2	33523.2	50067.3	56998.3	34892.7	42575.5	36824.6	53686.6	42070.3	79390.6	49206.5	49580.5	55897.7	88829	81569.3	110868	32175.9	50837.3	33351.1	44667.7	36218.2	51444.8	27511.3	56506.9	71806	49711	37611.2	74352.1	44959.4	62976.5	42252.6	33742	62305.7	91926.5	31710	9905.37	54875.9	19497.8	6724.61	Filtered	32945.6
A0A0D3A9C4	658190	326770	462629	429859	1.04479e+06	2.01252e+06	277665	424154	514824	318307	568958	477850	474427	732727	294262	396524	441875	441544	424350	457616	459545	592884	513458	483919	552823	553161	646112	380127	496407	608044	316136	608920	362737	317515	481926	391753	625705	385730	463674	622417	378973	294218	246881	410100	550290	230474	789504	720203	550583
A0A0D3A9C9	615460	444374	1.19989e+06	567676	1.0325e+06	880216	1.19288e+06	481868	850227	1.49801e+06	703135	1.64133e+06	1.61821e+06	721394	1.60503e+06	725491	802292	1.52371e+06	2.07413e+06	2.42512e+06	2.06699e+06	841718	1.0374e+06	900544	573192	1.14642e+06	647673	1.30558e+06	443396	1423397	515274	873002	1.07133e+06	492032	656905	1.9888e+06	736022	788233	556891	746972	1149361	1.04882e+06	366760	412033	319027	556567	374857	347135	1.472e+06
A0A0D3A9D2	Filtered	Filtered	57606.5	18668.8	Filtered	Filtered	Filtered	Filtered	36639.5	159048	210330	127202	64780.9	128184	80614.1	107129	138802	Filtered	133018	99809.3	8058.91	Filtered	Filtered	105427	Filtered	17662.9	35079.4	Filtered	Filtered	1	Filtered	Filtered	4039.74	Filtered	6415.23	1	Filtered	Filtered	Filtered	Filtered	13819.6	182551	195241	74830.7	1901.43	92428.9	Filtered	Filtered	Filtered
A0A0D3A9I1	Filtered	Filtered	22225	32920.8	10291.3	Filtered	57321.6	14803.4	Filtered	11632.6	23014.7	24955.9	31872.8	37137	17788.7	Filtered	19959.8	23972.1	13973	22676.3	4024.61	28825.4	21629.1	16387.3	18589.6	13631.2	Filtered	28507.7	9373.68	20120	19927.7	4924.16	35250.9	43920.3	43473.6	33724.1	33187.7	52223.6	63978.2	38945.9	19105.8	Filtered	Filtered	Filtered	15576.8	Filtered	9541.26	43792.4	45763
A0A0D3A9P5	1.30564e+06	841581	691729	1.13385e+06	1.07297e+06	1.34254e+06	906741	1344748	412788	695126	1.08382e+06	772624	914021	1.14799e+06	688859	887074	716878	737917	615506	788817	694847	762009	728082	763097	764899	635052	815655	711314	628972	708554	711593	537780	610221	891907	788234	696956	839398	799651	820682	850767	718311	471708	624286	576872	784142	615713	744898	880254	806864
A0A0D3A9S2	Filtered	Filtered	Filtered	Filtered	Filtered	Filtered	Filtered	Filtered	Filtered	Filtered	Filtered	Filtered	Filtered	Filtered	Filtered	Filtered	Filtered	Filtered	Filtered	Filtered	Filtered	Filtered	Filtered	Filtered	Filtered	Filtered	Filtered	Filtered	Filtered	Filtered	Filtered	Filtered	Filtered	Filtered	Filtered	Filtered	Filtered	Filtered	Filtered	Filtered	14498.4	51465.5	85093.8	Filtered	16085.9	27304.4	38022.7	Filtered	41906.2
A0A0D3A9U5	392625	171869	276753	185872	289761	894708	163577	169262	271632	176961	140755	160150	172186	151116	94894.6	141087	215623	252724	271086	273371	286884	280839	203803	205136	246332	314241	286486	289077	220680	436757	199758	402598	257097	205538	189873	281708	249693	207734	198762	280956	295007	522997	348615	297412	331606	382878	401201	278800	351851
A0A0D3A9U9	Filtered	436385	Filtered	Filtered	Filtered	Filtered	Filtered	Filtered	Filtered	Filtered	Filtered	Filtered	Filtered	Filtered	Filtered	Filtered	Filtered	Filtered	Filtered	Filtered	Filtered	Filtered	Filtered	Filtered	Filtered	Filtered	Filtered	Filtered	Filtered	Filtered	Filtered	Filtered	Filtered	Filtered	Filtered	Filtered	Filtered	Filtered	Filtered	Filtered	Filtered	Filtered	Filtered	Filtered	Filtered	Filtered	Filtered	Filtered	Filtered
A0A0D3A9V8	42782.2	78789.6	137162	90502.6	135096	169217	501712	94202.7	Filtered	28695	62544.6	73854.8	51046.6	33004.9	Filtered	46102	22382.5	99502.8	35708.7	28171.4	55154.3	29694.6	38046.7	19329	Filtered	112241	97218.8	62334.3	40334.5	47131.9	48198.7	Filtered	111194	76240.4	44318.6	57872.6	48808.1	Filtered	Filtered	Filtered	212719	227047	147544	140546	237033	138037	141699	360678	58336.4
A0A0D3AA31;A0A0D3E5L5	Filtered	88543.3	48445.2	Filtered	Filtered	Filtered	Filtered	Filtered	63295.6	23547.5	Filtered	34612.1	27330.9	8740.35	81992.7	44519.8	62326.3	33047.6	54846.1	58408.3	81132.3	58628.2	20391	56041.1	62669.1	54795.3	62872	9747.95	30158.6	89169.7	42425	62257	40409.2	98593.7	61884.5	59178.9	32549.8	15921	33815.9	71284.9	92696.7	143255	129312	82361.8	42884.7	72676.3	24913.5	80027.3	80549.5
A0A0D3AA55	35399.1	22935.6	23351.6	26212.1	30825.3	42340.2	16362.6	41065.7	37228	26270.4	33487.6	30526.6	36732.4	28592.5	32418.7	42121.8	23412.6	25841	26851.5	31933.5	32931	28106.5	26745.6	27840.4	29708	23426.5	26414.8	27699.1	23859.9	28267.9	26270.7	23243.4	25744.4	27338.7	29897.6	30646.1	31469.1	35351.8	26377.9	30181.8	23222	34586.6	18982.3	20753.2	50714.5	32402.4	29717.3	45878.8	18858.7
A0A0D3AAB4	Filtered	21437.5	49618.1	14333.7	42779.2	5007.21	35699.1	Filtered	58010.1	46455.3	50417.7	58725.5	81383.5	54666.8	79875	44755.5	51461.1	76106.1	77651.3	91895.3	86899.7	56702.9	57493.9	68193.6	40321.3	52340.4	35232.8	55838.8	39103.7	67201.9	26124.9	39035.7	69026.2	16122.8	48583.9	52608.7	53407.3	38913.9	43265	Filtered	20678.4	25203.7	Filtered	Filtered	Filtered	Filtered	Filtered	Filtered	33794.1
A0A0D3AAH8;A0A0D3BV84;A0A0D3E556	35354.9	230372	34088.4	106083	139342	Filtered	287692	203071	16609.8	162247	7006.37	74298.3	9699.31	25447.2	730032	161496	52891.5	11303.9	27129.6	8971.93	56958.5	31732.4	27607.5	8856.61	25401.4	202641	29869.6	81208	68841.2	22162.9	Filtered	347799	476799	50868.8	64555.7	30823.8	76307.7	150158	65284.7	Filtered	Filtered	11050.5	13403.7	36592.4	Filtered	5102.96	1	Filtered	19738.4
A0A0D3AAK0	16045.7	11751.3	5269.63	10409.4	11652.5	9082.43	Filtered	11003.4	1	1935.27	Filtered	4142.43	Filtered	8227.95	8594.04	6715.98	9871.8	5216.07	2189.94	8150.18	1304.99	4962.8	8388.28	12355.6	6429.76	1305.48	Filtered	6432.39	Filtered	Filtered	4540.2	3058.66	1703.01	3167.38	3356.86	Filtered	Filtered	9255.13	10453.1	3232.8	11476.6	Filtered	7643.52	15074.9	16532.9	15169.6	11160.5	22642.4	2398.83
A0A0D3AAQ4;A0A0D3BVE4	Filtered	Filtered	81975.1	Filtered	Filtered	941804	Filtered	Filtered	523656	294930	Filtered	Filtered	Filtered	Filtered	Filtered	Filtered	Filtered	Filtered	Filtered	Filtered	1	16810.4	Filtered	1	Filtered	Filtered	5597.29	Filtered	1	48374.9	488644	Filtered	21261.5	24756	Filtered	Filtered	1	1	Filtered	Filtered	Filtered	1	Filtered	21187.2	1	Filtered	Filtered	Filtered	Filtered
A0A0D3AAR8	Filtered	Filtered	1	Filtered	Filtered	Filtered	Filtered	Filtered	Filtered	2924.04	10952.8	Filtered	Filtered	1	6991.93	9694.65	4054.58	1571.06	9439.8	6079.88	Filtered	18795.5	Filtered	51271.2	24289	2588.51	9523.69	1908.42	53108.6	2798.35	4015.13	Filtered	Filtered	13766.1	8064.13	Filtered	26539.2	3559.83	12936	12887.7	Filtered	3890.27	Filtered	Filtered	Filtered	4002.19	Filtered	Filtered	Filtered
A0A0D3AAT2	113868	40083.5	93301.4	109535	90845.2	54702.8	95816.9	129429	48334.7	34444.6	80568.7	56327.4	69906.7	86314.6	52234.4	69110.9	42647.4	58699.6	35824.5	41693.7	34162.2	47874.5	47261.6	48994.6	71790.2	47687.2	25547.9	65306.5	59149.2	46338.8	63478	65271.9	48936	103452	75230.5	52872.7	36584.7	88205.3	93343.4	58615.8	73220.4	52088.2	87266.1	73881	124332	110267	109730	132932	49151.8
A0A0D3AAX8;A0A0D3D548	12642.3	17835.7	8205.84	9951.21	5672.45	12325.6	3797.76	10155.5	24604.1	9196.39	6762.79	7893.93	8017.67	6455.96	4790.85	4935.06	6462.88	5837.34	8959.82	11244.8	9708.58	8745.55	9511.25	8902.76	6050.74	4413.61	4424.01	4363.18	4311.17	6575.52	7597.34	8192.42	3717.37	4124.13	6274.1	9037.61	7705.43	7386.92	4859.39	7559.72	8565.42	6642.07	4477.77	6073.1	5518.46	4332.69	7492.94	9467.33	9919.47
A0A0D3AAZ5	Filtered	1	12410.8	99399	1	Filtered	Filtered	21531.6	10664.4	Filtered	Filtered	Filtered	Filtered	76339.6	Filtered	Filtered	Filtered	Filtered	Filtered	Filtered	2869.42	359.449	Filtered	4912.59	Filtered	Filtered	Filtered	Filtered	Filtered	7259.12	Filtered	Filtered	6947.82	3099.18	26260	1	9537.7	Filtered	3157.95	Filtered	Filtered	Filtered	Filtered	Filtered	Filtered	1	1	Filtered	1
A0A0D3AB14;A0A0D3BCZ0;A0A0D3D5B8	Filtered	18417.2	42463.9	Filtered	Filtered	Filtered	32466.1	Filtered	Filtered	35358	21212.4	34051.7	39059.2	30914.2	36265.1	40227.3	41203.3	35890.6	28482.4	44490.3	42676.2	36616.2	41124.6	37359.4	17048.2	36545.5	33952.7	43604.1	20399.5	31156.1	22017.1	34605.2	29396.3	35686.5	42675.8	37906.4	32944.4	24156.9	38245.1	Filtered	Filtered	21768.7	Filtered	Filtered	Filtered	23104.7	22973.6	Filtered	15886.2
A0A0D3AB77	1.88178e+06	111222	418370	1051163	697739	719886	352444	1.1468e+06	149905	353569	289762	363926	494442	629639	358568	250904	231863	284825	293415	321226	303506	227680	244179	257834	227848	193748	118591	294808	432988	245213	221535	260698	226165	307112	400233	463992	279253	533849	499306	426490	783133	56581.6	67638.5	94496.9	2.28423e+06	575627	1.7367e+06	3.58535e+06	300834
A0A0D3ABE7	Filtered	6512.74	11462	Filtered	13678.1	16211.8	Filtered	10194.5	39295.1	15093.9	22606.2	19113.2	14735.8	31795.9	24072.7	18299.4	14977.4	13202.3	7022.76	20104	15353.6	21605.9	11772.7	19838.7	19056.4	14233.1	21203.2	13098.5	12019.3	30459.7	6973.02	16687.9	12745.2	13807	4591.86	7408.27	22980.5	14676.2	16844.2	15221.7	11822.6	11219.9	16257.6	24632.4	30740.5	6828.63	14742.9	Filtered	11721.7
A0A0D3ABJ3	241016	242210	286426	216357	427397	380091	129917	184528	214796	114075	122154	113533	180014	233310	138828	121914	120237	112537	144884	166111	165220	158713	115853	159492	174678	152243	229926	158582	98262.3	167663	198271	174802	114633	172437	142692	163693	174890	162254	147180	154539	269516	218903	216649	295429	350340	496288	339388	485379	201837
A0A0D3ABK6	67068.5	180179	19947.9	12539.5	7349.9	16183.5	8824.93	62238.5	21807.5	30757.4	58330.2	32044.1	37815.4	53999.9	32164.5	44557.6	31506	23103.7	16847.4	5380.5	19437.4	37311	34149.5	37115.1	52669.5	27746.3	16841.6	7258.26	43669.2	8994.54	54789.9	43725.8	13819.5	40613.1	25194.6	16366.1	34961.9	61379.6	44940.2	49990.6	64066.4	151157	43725.1	196001	90520.6	47775.6	44935.7	102398	17926.5
A0A0D3ABW5	Filtered	Filtered	34797	22181.1	Filtered	Filtered	Filtered	33010.4	2157.11	7005.12	14980	9734.22	11058.5	Filtered	29559.4	Filtered	4942.7	22690.1	3768.74	15480.5	22972.9	Filtered	Filtered	Filtered	Filtered	11455.1	Filtered	12280.8	7392.95	28838.4	Filtered	12309.1	11155.3	Filtered	Filtered	18272.4	Filtered	6103.38	16072.1	Filtered	Filtered	18906.1	19819.9	21811.4	Filtered	13178.4	15881.8	Filtered	20408.5
A0A0D3AC80;A0A0D3CI99	180556	76161.5	112223	165411	93013.3	233051	47353.5	86453.1	Filtered	39653.8	26552.2	44465	58976.1	64067.2	40372.4	55309.3	75908.2	52898.1	30984.8	57816	47927	75968.6	57451.9	72049.6	70088.2	21295.9	22580.8	45653.9	31539.6	39041.7	40776.2	26532.4	60202.2	58228.8	68814	59164.4	45272.2	68256.4	82067.2	74034.3	143812	99304.5	104748	56554.7	124192	149874	182376	158642	60120.9
A0A0D3ACA9	Filtered	Filtered	Filtered	Filtered	Filtered	Filtered	Filtered	Filtered	Filtered	1389.44	2679.47	878.644	1480.89	Filtered	Filtered	1880.19	1017.44	1633.38	1428.6	Filtered	802.224	1757.57	903.461	1250.2	2050.5	1603.6	2158.75	2876.47	1977.65	1287.19	1876.76	Filtered	2309.1	6754.79	3125.59	2002.08	3495.76	4816.61	2484.11	Filtered	Filtered	Filtered	Filtered	Filtered	Filtered	Filtered	Filtered	Filtered	2874.12
A0A0D3ACB6	17324.2	Filtered	Filtered	99395.8	84053.8	92391.4	Filtered	11962	25457.5	143902	140307	118506	160394	187760	84630.8	109977	55934.8	75894.8	100656	79461.1	62467.5	72347.3	6170.45	45192.1	64181.9	130342	12567.3	83323.4	151732	51709.5	62338.4	67037.6	201585	120056	98348.4	116560	132106	94785	114360	38604.9	99451.9	41795.6	107211	151936	69964.7	84633	1.34611	55199.7	33634.3
A0A0D3ACE5	58982.7	48055.4	51271.4	Filtered	Filtered	Filtered	Filtered	Filtered	20435	49795.6	23385.4	32125	60110.1	1.03677	51159.7	Filtered	Filtered	Filtered	Filtered	63251.8	50867	18825.1	10988.8	34639.6	Filtered	36390.2	Filtered	26366.4	Filtered	44271.9	Filtered	12919.3	58856.3	31614.6	33493	69585.7	Filtered	25169.6	43837.2	Filtered	Filtered	Filtered	Filtered	Filtered	Filtered	Filtered	Filtered	Filtered	Filtered
A0A0D3ACH8;A0A0D3BC13;A0A0D3CW24;A0A0D3D1G5	Filtered	13799.2	40241.3	Filtered	41442.4	76462.1	33705.1	Filtered	427624	312658	32623.5	101741	82936.1	53881	43572.2	45660.5	33377	86369.8	70129.3	139119	41833.1	29463.4	52509.2	44078.4	Filtered	58600.9	20343.8	64637.6	5523.62	69870.9	195623	Filtered	57841.7	33129.8	43153.4	111862	44190.5	20742.3	8165.22	27426	Filtered	64813.1	19483.8	Filtered	43001.8	40571.7	25044.5	32276.6	59711.9
A0A0D3ACK4	96882.5	58307.3	58186.7	39958	57630.3	81483.6	61421.1	99521.8	1018.99	35344.2	45961.5	34041.2	38782	41091.9	23894.7	35984.3	43197.7	40960.5	31182.9	30810.6	46874.6	46971	45826.8	33096.4	46558.6	35002.6	59141.7	59098.4	44226.8	44710.2	28986.4	45401.3	30189.9	43023.6	60768.5	47140	55898.4	55419.3	44076.4	58035.8	54560.8	80778.9	104716	73343.8	133756	111621	125466	141177	55994.5
A0A0D3ACN1;A0A0D3CIZ3	697079	249691	396616	460880	658029	746838	290439	560026	Filtered	Filtered	29121.7	94477.5	21743.2	770909	30802	202952	33600.8	Filtered	Filtered	Filtered	Filtered	36629.9	20912.4	Filtered	19423.8	Filtered	Filtered	237615	56513	203919	Filtered	29791.5	Filtered	Filtered	319839	10092.2	11390.6	Filtered	Filtered	55157.5	371289	Filtered	80386.9	70530.8	786447	310959	542279	690725	1771.97
A0A0D3ACP5;A0A0D3ACP6	Filtered	27460.8	28972.8	26057.5	15518.7	Filtered	12269	31913.6	126743	17592.6	35450.4	34439.4	19814.7	Filtered	21130.6	29573.4	17312.6	21751.9	28932.5	30907.2	26914.1	15676.8	19879.1	Filtered	10391.5	19379.3	15929.6	24476.1	12470.8	17596.3	21385.1	16982.2	Filtered	10783.8	Filtered	28056.7	21344	Filtered	16319.8	Filtered	24837.3	41512.8	25196.8	35499.1	35915.1	Filtered	29173.1	27229	16792.9
A0A0D3ACP8	329554	281199	204062	324485	341147	372002	220042	302401	162341	250919	172159	177314	244429	138680	211706	131925	180828	189208	174014	222735	245595	191889	250154	206396	113898	124484	136031	141893	91607.3	164784	102498	180009	68905.3	75279.9	111121	117498	140966	158832	145579	74192.8	160949	133734	219064	102985	162570	133475	301746	210427	134535
A0A0D3ACU2	Filtered	Filtered	Filtered	18512.8	Filtered	Filtered	Filtered	28487.3	48073.2	13261.6	17212.3	15947.2	4064.41	42009.9	Filtered	10637.8	Filtered	Filtered	2336.31	Filtered	Filtered	233.544	3499.36	6414.59	Filtered	3400.19	13315.8	Filtered	15067.1	Filtered	13289.9	21484.6	1	Filtered	6327.01	8888.1	14303.9	4727.22	3577.82	10070.3	Filtered	6136.87	Filtered	Filtered	10391.2	Filtered	Filtered	Filtered	Filtered
A0A0D3AD19	48519.2	70686.6	39976.6	53086.4	Filtered	23981.6	Filtered	51801	22057.5	48756.6	62047.9	54793.8	45237.3	57393.4	32155.2	38481	38718.5	47707.3	22217.9	21050.5	28864.1	107244	38796	56212.2	40860.3	23607.1	36160.6	14232.3	42086.2	30868.4	28478	60490.9	2553.13	24967.7	1	14351.3	43513.7	43515.7	26464.8	65076.4	46052.4	33384.6	104087	116759	99277.8	165452	43148.8	110233	51426.4
A0A0D3AD38;A0A0D3BBN6;A0A0D3CJI5	206690	27058.1	197369	83748.3	155948	1.00656e+06	176009	21785.8	385046	287644	38620.4	103892	74390.9	Filtered	80192.2	26667.7	60441.9	68230.7	125097	84671.2	131969	41484.4	37452.7	56609.7	48309.4	111776	34505.5	87659.3	35279.6	140622	226174	Filtered	83109.6	64215.5	41257.8	48055	39278.8	Filtered	30739.7	19447.3	84022.5	123101	68300.5	108074	115425	113801	Filtered	Filtered	87767.1
A0A0D3AD39	Filtered	Filtered	1	Filtered	Filtered	Filtered	Filtered	Filtered	Filtered	5926.66	Filtered	9272.54	19412	Filtered	6685.93	8527.46	8828.05	13709.7	1	11927.9	8733.84	6659.45	11076.9	6423.08	4380.92	5678.42	5266.82	8240.58	6261.52	12605.2	6050.98	Filtered	8131.25	1	Filtered	4862.08	6079.64	7665.97	8768.94	Filtered	Filtered	Filtered	Filtered	1	Filtered	Filtered	Filtered	Filtered	3704.3
A0A0D3AD60	502249	235990	321447	405707	449830	286699	222288	455179	Filtered	72076.7	1	71806.4	11234.8	1	Filtered	263346	143134	78704.2	31456	68538.6	81063.1	34822.9	115193	22917.1	12144.6	122144	Filtered	133210	36705.4	485.097	1	241482	72161	115804	76191.7	12227.4	19951.4	35875.9	5071.09	209104	167229	229659	202750	119881	134909	216243	178496	93952.4	55734.7
A0A0D3AD79;A0A0D3BBL5;A0A0D3CJQ3;A0A0D3CRD5	Filtered	Filtered	Filtered	Filtered	Filtered	Filtered	Filtered	Filtered	Filtered	292253	2610.94	165721	219754	Filtered	224018	21178.5	62497.3	188038	251173	352922	381356	18056.2	56774.6	52478.2	Filtered	123046	Filtered	110318	Filtered	205685	158332	Filtered	121754	34204.2	22613.9	72172.2	Filtered	100218	39383.4	34416.1	Filtered	Filtered	Filtered	Filtered	Filtered	Filtered	Filtered	Filtered	Filtered
A0A0D3AD93;A0A0D3AV03;A0A0D3BBK2;A0A0D3C4P7;A0A0D3CJR4	4007977	2.62639e+06	2.20021e+06	3.38666e+06	2.99943e+06	3.15075e+06	3.95118e+06	4.24368e+06	1.58695e+06	1418639	2.03043e+06	1.12666e+06	1976503	2.51651e+06	1.10932e+06	1.363e+06	1.32786e+06	1.21274e+06	1168565	1.29217e+06	757732	1.35373e+06	1.35874e+06	1.4429e+06	1.57831e+06	1.16508e+06	1.53756e+06	1.76336e+06	1.39831e+06	1.46509e+06	1.17262e+06	1078582	1.47274e+06	2.24927e+06	1.5853e+06	1.74882e+06	1.51763e+06	2.43699e+06	2.56059e+06	2544993	4.19671e+06	3927976	4.95468e+06	4979448	6.00467e+06	3.87961e+06	5.14663e+06	9001741	3537573
A0A0D3ADA6	196786	161649	97300.8	156900	154934	218321	156450	157561	452902	280492	490760	310246	417197	442870	282826	304841	192466	229398	202233	223107	216914	226266	199572	219223	321558	237133	257001	178704	288349	238136	263729	307408	163110	176942	195700	245469	235340	185383	198960	175214	111527	74766.8	77930.7	99290.5	133466	104829	121286	161364	150129
A0A0D3ADA8	Filtered	Filtered	Filtered	Filtered	Filtered	Filtered	Filtered	Filtered	78015.8	47781.3	Filtered	Filtered	Filtered	Filtered	Filtered	Filtered	Filtered	Filtered	Filtered	2853.74	Filtered	Filtered	Filtered	Filtered	Filtered	Filtered	Filtered	Filtered	Filtered	Filtered	31181.1	Filtered	Filtered	Filtered	Filtered	Filtered	Filtered	Filtered	Filtered	Filtered	Filtered	Filtered	Filtered	Filtered	Filtered	Filtered	Filtered	Filtered	Filtered
A0A0D3ADB6;A0A0D3CJT7	223141	77966.9	16855.1	40309	11106.8	Filtered	23325.3	94365.7	172430	Filtered	86197.8	Filtered	Filtered	37657.8	3278.69	15085.9	11829.4	1	5701.5	Filtered	Filtered	Filtered	Filtered	29133	45040.7	12183.6	51770.7	Filtered	Filtered	Filtered	35080.7	Filtered	20812.7	27185.7	49341.5	Filtered	49992.7	34008.4	Filtered	35194.9	66426.7	94721.6	191400	220650	281447	485897	237877	208225	5592.07
A0A0D3ADB9;A0A0D3BBI2;A0A0D3BBI3;A0A0D3CJT9;A0A0D3CJU0	1.04205e+06	199348	3.91002e+06	428197	Filtered	610031	4.13603e+06	4.03336e+06	1779568	1.23777e+06	6.56689e+06	852873	1.30949e+06	95677.1	1.33158e+06	2.88104e+06	747616	1.30236e+06	1.07311e+06	955846	1.05438e+06	1761856	1.336e+06	1.6205e+06	1.7973e+06	2.09306e+06	1.33916e+06	2.33333e+06	342585	1.77176e+06	1.12536e+06	208772	790540	1225780	2.82484e+06	1290904	3.16443e+06	2.23178e+06	1.45173e+06	1.4974e+06	2208280	224463	3.30275e+06	232192	1.20139e+06	87465.2	2.00171e+06	1.33306e+06	583565
A0A0D3ADC0	Filtered	Filtered	Filtered	Filtered	Filtered	Filtered	Filtered	Filtered	Filtered	Filtered	Filtered	Filtered	Filtered	Filtered	Filtered	Filtered	Filtered	Filtered	Filtered	117384	126603	122908	133834	135089	Filtered	101898	Filtered	Filtered	206926	Filtered	85763	133197	Filtered	Filtered	Filtered	Filtered	Filtered	Filtered	Filtered	Filtered	Filtered	Filtered	Filtered	Filtered	Filtered	Filtered	Filtered	Filtered	19112.6
A0A0D3ADG1;A0A0D3CQK9	197244	97040.8	96980.8	164218	116574	159530	124397	154390	2871.63	Filtered	Filtered	Filtered	Filtered	133158	Filtered	Filtered	Filtered	Filtered	Filtered	Filtered	Filtered	Filtered	Filtered	Filtered	Filtered	Filtered	Filtered	Filtered	Filtered	Filtered	Filtered	Filtered	Filtered	Filtered	Filtered	2937.48	3797.13	Filtered	Filtered	Filtered	92954.6	Filtered	Filtered	Filtered	139089	31409.3	44471.1	268979	Filtered
A0A0D3ADH9	2537858	843306	1.95047e+06	1.56832e+06	3.93343e+06	1.4335e+06	1685459	1370794	1095806	1.3853e+06	1917471	1.45424e+06	2135815	1568028	2.04529e+06	2.21753e+06	1.52421e+06	1.85087e+06	1.63013e+06	2.07234e+06	2169655	1.3311e+06	2.05162e+06	1712503	1291712	1.41401e+06	1.29157e+06	2.00507e+06	916556	2214567	1.11067e+06	1.70049e+06	1.60101e+06	1.59923e+06	1.69686e+06	1.93502e+06	1.66168e+06	2.17197e+06	1.69081e+06	2.50949e+06	2.22765e+06	1.82653e+06	1.57845e+06	1631427	1.82096e+06	1.68238e+06	1.71255e+06	1.7315e+06	1.64703e+06
A0A0D3ADL1	Filtered	Filtered	Filtered	Filtered	1	Filtered	Filtered	Filtered	1	1805.13	Filtered	Filtered	1471.28	Filtered	1043.23	1767.8	Filtered	Filtered	Filtered	Filtered	483.462	Filtered	1954.19	476.741	7124.08	Filtered	Filtered	Filtered	Filtered	Filtered	2481.81	9596.93	Filtered	5020.22	Filtered	1238.12	Filtered	7712.13	5723.29	Filtered	Filtered	Filtered	Filtered	Filtered	Filtered	Filtered	5420.1	Filtered	Filtered
A0A0D3ADL7;A0A0D3B4U7;A0A0D3BBB7;A0A0D3BIZ3;A0A0D3BS59;A0A0D3C446;A0A0D3CK62	Filtered	Filtered	Filtered	Filtered	Filtered	85727.4	Filtered	Filtered	374393	193610	18912.9	41203.8	41116.8	25803.2	23880.6	14512.6	42513.4	56528	97149.5	91763.2	94370.8	27848.7	48234.7	32402.2	44302.1	53016.5	31178.4	36131.1	16865.2	43641.2	150263	33011.5	55623.1	21931.7	18589.7	54358.8	21284	Filtered	Filtered	15818.1	Filtered	41302.4	19185.2	Filtered	Filtered	48965.1	Filtered	Filtered	53427.5
A0A0D3ADP2;A0A0D3BBA2	Filtered	91465.5	479370	37268.8	137904	3245638	63109.9	78669.6	1527866	845343	53870.4	86445	41644.3	35203.2	110198	36120.8	48789.2	61358.4	121843	108310	136413	35379	39141.7	66807.9	17597	51386.2	35123.9	62262.3	35490.2	250617	1.09244e+06	1	93201.7	80163	7891.58	92587.8	23365.7	39803.3	16612.3	8812.4	64505.9	62533	32301.4	61466.8	33731.7	Filtered	Filtered	Filtered	90210.2
A0A0D3ADQ1	Filtered	96331.5	145116	128421	49003.7	49341.9	193877	86223.1	156668	66566.1	44827.9	110933	48284.1	1216.04	132348	188134	7478.46	3407.93	4540.22	Filtered	2494.74	9847.29	2652.16	12150.3	17532.7	8750.67	5005.18	2317.02	2588.09	17981.1	2221.05	23725.1	26388.6	68098.8	18919.3	56696.8	142376	21393.3	32352.2	69687.4	216873	321960	467324	471490	138993	216309	124399	25156.7	64980.1
A0A0D3ADS3	Filtered	2479.76	Filtered	Filtered	Filtered	Filtered	Filtered	Filtered	7487.29	1132.4	2826.34	2580.27	2295.35	Filtered	2693.94	Filtered	4242.74	3108.62	4837.7	5075.73	1710.68	2930.24	Filtered	5023.61	2561.97	4198.56	2492.17	3086.84	1251.91	Filtered	3498.1	Filtered	4467.01	5102.75	2383.74	4987.73	5546.54	5510.84	4588.94	2896.81	Filtered	6532.06	Filtered	Filtered	Filtered	Filtered	Filtered	Filtered	6468.8
A0A0D3ADS4	259755	37634.9	80615.6	Filtered	100616	250933	56158.2	Filtered	1665557	103125	300049	193830	135597	344151	137749	222936	154202	188228	187186	187292	186352	204798	174874	177246	230009	206514	190739	253693	262331	211616	201368	267107	207593	169558	176808	153935	248124	116970	127684	132450	111744	115714	168670	170543	264758	221121	142789	166648	209389
A0A0D3ADS7	599183	336634	257140	331418	418645	590590	329949	519643	63553.5	186368	284467	237300	393349	371866	294992	322134	222758	199810	128482	170557	167512	276003	271686	137888	277191	194421	206209	295701	286091	325332	259201	299033	100306	214823	319768	122068	180297	312291	321699	353778	465325	327196	418428	465874	714869	728728	469284	753602	75818.1
A0A0D3ADS9	63366.9	60142.2	11343.3	31887	44546.1	21448.6	38539.1	58648.4	40463.1	59730.3	81976.3	52978.5	61007.7	32913.4	41179.2	51188.4	36567.5	36411.9	24167.7	42021.4	28590.4	32057.4	31066.3	36398.7	65229	41502.9	45729.3	36567.6	42346.4	26238.6	27672.5	41874	38265.9	52140.8	44972.6	14915.9	54072.3	72369.6	63737.3	28442.3	33785.7	60825.3	47452.8	49666.1	68716.6	60272	59565.6	128406	15680.9
A0A0D3ADT8;A0A0D3BB70;A0A0D3BN25;A0A0D3CKF2;A0A0D3CSB9	Filtered	11141.5	35803.8	Filtered	Filtered	421304	33778.4	Filtered	94129.8	63307.3	Filtered	15698.8	8686.43	Filtered	18416.8	5043.9	Filtered	11367.9	9986.25	23772.9	18469.8	12522.9	2882.57	5270.63	15187.4	3197.82	Filtered	Filtered	1	15994.2	41002.3	Filtered	10658.4	5779.13	6357.86	7278.11	1	Filtered	Filtered	7145.32	22049.6	14804.1	54733.1	1	17155.1	Filtered	Filtered	Filtered	17887.4
A0A0D3ADZ3	16076.4	13734.7	12818.1	Filtered	Filtered	Filtered	13920.3	Filtered	46801.5	7452.16	18931	15030.6	6637.96	7535.83	19422.7	Filtered	Filtered	9135.1	Filtered	Filtered	5287.35	Filtered	2271.05	Filtered	5979.02	7312.14	8028.71	1790.88	6298.93	7818.69	6872.77	Filtered	5989.9	4464.89	3437.6	11240.8	10474.9	Filtered	9899.91	Filtered	15371.9	11740.2	5003.62	12013.8	10079.3	7604.1	Filtered	Filtered	Filtered
A0A0D3AE14	1.74556	53786.1	5503.32	42626.6	1.81903	Filtered	85644.3	25786.6	51126.7	20526.5	58342.9	63256.1	44680.3	46718.8	37920	54977.7	48448.6	54643.8	34138.6	24100.7	29557.9	60320.2	31540.1	67009.5	71690.5	15403.8	75699.3	22416.5	67393.6	26707.9	19972.6	49468.2	35593.5	91723	73925.5	87899.1	66437.8	37682.7	54775.8	31845.7	59657.2	37816.7	76049.3	86172.9	75251	107997	113302	99898.8	53785.7
A0A0D3AE15	Filtered	11724.6	Filtered	Filtered	Filtered	Filtered	10184.7	17203.2	Filtered	1133.77	8436.38	5793.37	3719.04	Filtered	Filtered	7512.67	13369.3	6730.18	7995.56	5053.56	5123.08	6265.56	12430.4	11589.6	1809.91	5422.7	8405.18	11092	5493.87	2980.96	1840.33	9798.74	8379.91	7627.38	3979.39	7612.33	8215.86	Filtered	15829.5	3477.12	Filtered	8517.8	15352.6	12791.8	Filtered	8168.86	11541.6	Filtered	8114.01
A0A0D3AE17;A0A0D3BB29;A0A0D3CKP5	185603	87791.2	150658	155536	191670	167154	159349	227846	11550.3	6425.02	Filtered	16281.1	9756.08	22495.9	15200.3	19038.4	Filtered	Filtered	Filtered	9410.33	4890.95	Filtered	Filtered	6290.59	Filtered	1521.21	Filtered	33723.7	Filtered	37393.6	2295.38	Filtered	16358.3	8414.64	43333.3	12480.7	10179.9	14099.5	Filtered	23434.6	157843	92982.9	106024	92275.2	146684	261513	232142	124564	6291.51
A0A0D3AE24;A0A0D3CKQ3	418797	171589	385364	207269	250249	325678	365426	234865	192315	163988	89210.8	149072	152823	138219	145727	112006	111015	91381.7	159750	177056	182576	149203	149453	242727	146745	113994	147754	115234	93487	235483	109830	237452	58250.8	83797.9	108076	148238	172885	145018	162606	101802	367378	423372	146212	140168	254162	188658	307611	346209	265417
A0A0D3AE71	Filtered	10878.1	Filtered	3613.76	Filtered	Filtered	3592.23	12107	28493	14337.5	23532.6	15599	11440.7	17235.5	15565.2	14114.4	14584.1	2588.8	6712.83	9632.5	8001.08	7670.44	8876.97	8106.44	Filtered	Filtered	2813.61	Filtered	476.946	Filtered	3970.58	Filtered	Filtered	11208.6	Filtered	1455.56	6510.26	Filtered	Filtered	Filtered	1761.87	5653.84	10889.9	8303.47	8313.05	6537	8661.82	Filtered	3696.97
A0A0D3AE96	259021	199015	315641	274403	438656	567479	2700155	275614	537597	283469	455364	333770	424147	501792	263030	278040	99267.2	298224	133959	168189	127689	114728	145722	118193	197912	302897	209605	470985	270167	290418	236616	127835	460356	219639	218834	303355	218897	262264	271724	279496	396339	1099491	789255	721071	508817	282180	273751	869557	290869
A0A0D3AEE9	258548	221261	126592	204191	308411	275307	158749	225540	342510	303375	243609	184568	237605	204217	165704	192982	194870	130971	188914	187408	138207	127654	153509	162051	138704	162400	178357	156420	152462	132389	145858	148077	118491	156016	189873	190715	140237	185724	153544	263566	186244	162277	181957	165397	208419	224068	216422	253157	204334
A0A0D3AEF0	Filtered	52667.3	Filtered	Filtered	76798.9	69808	Filtered	253137	84340.2	16565	130902	83028.8	21655.2	Filtered	56103.8	109097	66714.1	27842.7	33102.2	49633	15782.1	100270	91249.1	66216.9	69041.9	21231.3	100454	5165.06	54772	26333.5	115464	82528.4	57070.8	16463.5	76416.8	22473.4	123080	269107	28049	54935.3	6561.07	Filtered	60893.9	Filtered	78099.3	Filtered	56912.4	99565.9	38664.9
A0A0D3AEF6;A0A0D3BAS5	1923020	6962.61	56295.9	461653	578567	3066280	2862058	201517	449799	128413	5553.27	2949.93	4490.72	316884	145528	7802.71	7118.54	4467.84	10438.6	44537.1	9217.94	9084.17	6890.06	7202.72	11559.1	6954.94	22354.8	9262.64	2341.93	80163.4	285991	21709.7	73253.5	19757.9	375958	10915.3	7837.26	43447.2	3869.44	755676	726278	9565.6	51925	812653	160134	22324.4	53088.9	222418	263416
A0A0D3AEG6;A0A0D3DSJ9	5958816	3.59871e+06	6.36433e+06	5973629	5667164	4717250	5651618	3474447	2981272	3.44456e+06	4284261	2858588	3.20071e+06	4205384	3116080	2.24119e+06	1792311	2.44616e+06	2.4988e+06	3081877	3024056	1876141	5029945	2.13063e+06	2473447	3.97217e+06	1604747	1.67557e+06	1.06851e+06	2.50064e+06	921882	4.16355e+06	2.00166e+06	1626273	2.16338e+06	3274862	4.38778e+06	2222984	3.28664e+06	5.47894e+06	2.76865e+06	2.01434e+06	1048306	2.0909e+06	3.01704e+06	2.66199e+06	1.63566e+06	1.85805e+06	2.8401e+06
A0A0D3AES5	27104.3	Filtered	2316.92	9622.76	Filtered	Filtered	Filtered	17041.9	Filtered	Filtered	Filtered	Filtered	Filtered	Filtered	Filtered	Filtered	Filtered	Filtered	Filtered	Filtered	Filtered	Filtered	Filtered	Filtered	Filtered	Filtered	Filtered	Filtered	Filtered	Filtered	Filtered	Filtered	Filtered	Filtered	Filtered	Filtered	Filtered	Filtered	Filtered	Filtered	40399.5	52286.5	59605.7	72251.3	41200.7	31612.7	39809.6	31103.5	Filtered
A0A0D3AET0;A0A0D3CLI6	Filtered	59440.4	55273.8	83500	Filtered	Filtered	51936.6	Filtered	167833	297360	621744	257202	102773	125459	27764.7	93582.8	Filtered	37057.1	85328.2	Filtered	Filtered	Filtered	Filtered	Filtered	73185	27099.8	97452.6	72724.3	16638.4	Filtered	Filtered	Filtered	114060	205641	234969	151361	138225	80448.5	30155.3	127569	Filtered	Filtered	Filtered	Filtered	Filtered	Filtered	51390.5	54602.7	190714
A0A0D3AEU1	338210	357167	371425	400912	516736	288718	467204	361562	447771	237886	401622	239987	293136	361742	291257	401584	424752	311648	320471	418959	360756	430230	402927	447086	309867	235280	355722	374081	281239	310390	249219	278437	293161	298149	331093	315709	395159	308623	311534	423688	458730	333267	279553	343764	389307	243807	442646	480558	252795
A0A0D3AEU3	30362	63704	84760.5	Filtered	118438	133131	1	Filtered	414643	183761	37398.7	96232.5	71207.6	183480	5173.9	91601.2	47661.6	119783	224509	229196	193931	135213	148786	78923.9	21894.6	86354.9	46388.2	75587.9	92050.5	97143.5	132049	105062	59392	32848.5	Filtered	117426	100256	27542.4	50823.5	Filtered	115651	117641	72770.2	55107.3	74169.6	117908	48823.6	50170.7	184437
A0A0D3AEU6;A0A0D3CHQ5	271916	189296	243544	547032	366904	519206	226292	298036	130474	Filtered	31370.3	13396.5	Filtered	Filtered	33432.3	60308.1	27839.7	51348.1	Filtered	Filtered	11639.3	Filtered	Filtered	Filtered	187154	74646.1	131977	141381	149623	Filtered	122889	209417	167979	192538	212662	124173	189493	158063	183187	295490	170783	Filtered	Filtered	172007	264075	Filtered	283868	295136	374603
A0A0D3AEV7	135682	192854	300797	128309	344710	286592	278254	177916	217052	369655	318975	368150	373457	192206	374124	275502	174927	355151	355693	391576	447736	187066	300436	197628	112201	230406	230743	231462	172054	379857	171083	182073	203523	212577	181243	378235	184373	196333	170926	276980	358188	217775	123367	109680	127970	110586	157027	102769	261568
A0A0D3AEW3	1.32708e+06	507804	1.58756e+06	1.03551e+06	2.01716e+06	1.1063e+06	1.37107e+06	1.32022e+06	714105	649932	460475	743312	873870	672924	619079	268840	128949	358323	461204	475691	420454	183189	314682	221751	136540	160707	97569.8	143074	118558	272984	158904	86328.5	415748	244658	427648	933676	313444	408685	540353	343640	1.45054e+06	1.11588e+06	645280	709561	936019	826246	922593	922958	499929
A0A0D3AEY6	77621.1	Filtered	98386.8	82709.8	78201.2	Filtered	Filtered	51223.9	19901	51041.6	8793.07	49797.3	42815.6	Filtered	69566.2	Filtered	49536.5	108229	59180.5	75645.9	81787.4	53859.6	61834.2	30546.3	Filtered	46122.6	50895.1	59546	30961.6	106213	17230.7	41960.3	89460.2	46373.3	44456.4	58043.6	48227.8	39338.6	29198.1	70086.8	88330.4	114714	50471.4	24762.6	63657.2	34262.2	58884.4	105448	90557.9
A0A0D3AEY7;A0A0D3B5Y7;A0A0D3BAF4;A0A0D3CLR0	80147.5	105031	194492	Filtered	128152	659240	Filtered	99287.2	705659	434773	74281.4	157985	108130	Filtered	88354.7	20412.1	53010.9	110329	147062	175831	106814	54704.2	70040.4	62944.7	25574.6	92730.3	56804.4	105977	50011.9	129546	335526	28954.8	126869	85135.6	31513.8	181624	77500.8	55067.2	Filtered	74547.3	213032	256862	92998.5	137940	101102	120245	72021	39820	143918
A0A0D3AF24	Filtered	5865.8	Filtered	Filtered	Filtered	Filtered	2786.36	Filtered	Filtered	541.58	8049.61	4182.06	2160.58	7574.63	Filtered	7582.59	Filtered	Filtered	Filtered	Filtered	Filtered	Filtered	Filtered	Filtered	899.701	Filtered	471.641	Filtered	2505.98	Filtered	3168.88	2803.24	6651.8	11452.4	7447.6	8603.84	12530.6	15156.9	12340.3	8756	Filtered	Filtered	Filtered	Filtered	Filtered	1653.51	Filtered	Filtered	Filtered
A0A0D3AF42	52978.4	95353.6	44620.2	67571.4	85304.2	63258.4	95507.6	71835.4	148888	184780	228188	187488	192976	201144	121503	169851	191351	156979	112913	171346	128948	160871	163567	205805	209635	160203	217380	184454	193046	126575	175852	176943	79336	265792	170769	198489	171615	245719	265307	191998	88829.9	68090.6	89355.1	28825.7	62612.1	108469	62229.2	95995.5	167722
A0A0D3AF55	Filtered	28602	Filtered	Filtered	Filtered	Filtered	Filtered	Filtered	32126.1	22615.7	112381	22203.5	12487.4	56220.5	11551.8	80394.8	61628.1	17941.2	71011.4	Filtered	6622.78	72886.8	46742.9	21247.6	47324	95983.8	79130.2	57109.7	91439.4	16055.8	61443.8	89123.6	206692	46438	36350.9	36473.2	68387.2	74062.3	95127	36763.8	Filtered	95253.2	78333.9	82360.8	Filtered	Filtered	Filtered	Filtered	38897.4
A0A0D3AFE0	Filtered	Filtered	105813	Filtered	Filtered	Filtered	Filtered	Filtered	Filtered	13815.2	49053.7	49006.1	36062.2	75910.5	49949	148003	264588	123751	171088	181778	106848	199165	109970	261366	37279.9	158888	87140.9	102514	116997	115370	87136.9	172782	80040.2	76475.4	Filtered	37633.8	Filtered	87793.6	145310	Filtered	59242.1	62091.1	123101	47438.5	Filtered	41254.2	Filtered	Filtered	Filtered
A0A0D3AFE4	504505	305053	302932	427797	785516	652516	334772	518657	795111	735869	1.21217e+06	899139	1.27693e+06	1.62906e+06	819749	986472	215662	830928	188886	121213	253570	354862	259806	201402	1.74407e+06	1.38325e+06	1.73263e+06	1.52741e+06	1.30859e+06	1.28257e+06	1.19372e+06	1.46409e+06	1.02207e+06	1195703	1010415	970938	818325	1.73199e+06	982814	1.60583e+06	391461	236960	219046	349843	457775	116184	443969	565394	481677
A0A0D3AFF8	2867130	5.07983e+06	3.84136e+06	4.67064e+06	3.76599e+06	7.58146e+06	4.08576e+06	7404311	Filtered	Filtered	Filtered	Filtered	Filtered	Filtered	Filtered	Filtered	Filtered	Filtered	Filtered	Filtered	Filtered	Filtered	Filtered	Filtered	Filtered	Filtered	Filtered	Filtered	Filtered	Filtered	Filtered	Filtered	Filtered	Filtered	134616	Filtered	Filtered	Filtered	Filtered	Filtered	4.00364e+06	5.97677e+06	3112584	5617657	3186109	1.86186e+06	4.86917e+06	8494461	Filtered
A0A0D3AFG9;A0A0D3B9T8;A0A0D3CMJ2	Filtered	4609.47	143657	Filtered	28424.5	389170	Filtered	Filtered	149331	460379	9937.44	61192.6	55402.9	Filtered	52095.9	1	35761.8	60734.7	105293	80348	65209.9	19308.9	13399.2	24945	11953.7	55321.4	12520	12774.9	1	67142.7	216121	Filtered	39743.1	Filtered	Filtered	51943.5	22895.2	20401.7	21629	Filtered	Filtered	28062.4	Filtered	Filtered	Filtered	Filtered	Filtered	Filtered	24492.4
A0A0D3AFH4	931701	1.16443e+06	2.0521e+06	1621626	2129258	1.11708e+06	1.21586e+06	1.76862e+06	644017	1.05024e+06	1.30533e+06	1.20697e+06	1.49328e+06	1.15893e+06	1.32814e+06	955680	735754	931384	1093961	1.13848e+06	953699	848313	918070	862760	983861	962271	873802	1.18587e+06	709435	993313	799605	919379	828178	1.04801e+06	852818	1116941	1.05494e+06	1226520	1.0489e+06	1.37455e+06	1.62724e+06	1.38851e+06	894861	1.15202e+06	1.14867e+06	1140065	933173	1.85672e+06	1.24497e+06
A0A0D3AFK9	676941	394059	621718	493160	773783	942026	644293	367250	660980	654552	406376	712462	879506	474951	900178	552992	432891	814755	672773	1030427	1.04049e+06	400591	656066	484033	311120	465898	336833	634990	238144	803599	320974	481876	631018	324339	487007	749348	402962	407611	426810	613376	524077	347641	257631	268934	302035	322592	416170	458254	565572
A0A0D3AFN4	Filtered	Filtered	Filtered	23847.8	5867.95	Filtered	66999.7	21824	Filtered	24271.9	21955.9	21248	26958.9	49378.5	18150.6	10840.5	4913.14	12598.4	17574.8	24615.1	Filtered	Filtered	5905.69	Filtered	Filtered	1602.98	Filtered	Filtered	Filtered	Filtered	7586.01	Filtered	19078.9	8231.78	2854	3132.29	Filtered	Filtered	12995.6	12608.2	33010.5	27244.2	12762.8	13660.7	25054.6	2072.11	Filtered	44707.2	66855.9
A0A0D3AFP0;A0A0D3B9L0	Filtered	13079.3	Filtered	Filtered	Filtered	Filtered	Filtered	Filtered	154156	Filtered	40311.5	18488.6	13071.8	Filtered	23127.1	Filtered	4495.24	21332.1	33737.9	23624.4	13335.1	15363.3	19049	Filtered	10556.9	38031.7	16268	Filtered	Filtered	Filtered	48003.4	Filtered	49795.2	15329.5	9215.52	28697	Filtered	Filtered	Filtered	Filtered	Filtered	95920.4	Filtered	Filtered	Filtered	44131.9	Filtered	Filtered	121251
A0A0D3AFW5;A0A0D3CN45	1.19124e+06	542049	770169	817742	1.1402e+06	1.39277e+06	859247	889295	303044	539671	572980	573179	707588	524541	652082	716301	583507	600566	643921	712535	583725	625087	618920	619135	544720	476760	605446	642004	357266	739653	416774	538334	411659	610572	509798	791212	746825	506811	605655	715135	991678	810807	556308	569622	769427	791909	856435	735389	642309
A0A0D3AFZ3	1001350	277252	292914	546574	486435	687568	239728	453420	398078	70407.8	226737	81049.3	108879	239348	124616	207206	232428	126896	119317	118619	115689	294050	182731	224263	283107	217350	339313	153826	207209	214901	238422	198132	200795	261349	236024	177986	372248	316838	325171	380940	241196	237475	489808	581188	484728	496783	384907	557594	147088
A0A0D3AG20	Filtered	Filtered	1	Filtered	Filtered	Filtered	1	Filtered	Filtered	Filtered	Filtered	2401.84	1653	Filtered	319.115	619.535	Filtered	Filtered	Filtered	Filtered	Filtered	Filtered	Filtered	Filtered	Filtered	Filtered	Filtered	Filtered	Filtered	Filtered	Filtered	Filtered	Filtered	Filtered	Filtered	Filtered	Filtered	Filtered	Filtered	Filtered	Filtered	Filtered	Filtered	Filtered	Filtered	Filtered	Filtered	Filtered	7377.77
A0A0D3AG29	236538	363705	565765	103392	Filtered	695222	311884	255764	371194	236559	146075	353062	332371	188876	374626	220981	82107.6	375954	381085	439868	216099	184351	196886	197606	203109	392652	268760	419645	155915	476968	303555	315073	237613	161561	225920	448462	226016	268273	221029	203484	481474	565313	254363	222040	168957	474003	200360	200707	360057
A0A0D3AG56;A0A0D3B9A5;A0A0D3CNF6	144502	23798.7	74330.6	125146	144893	232185	Filtered	87001.1	73834.7	110948	35500.8	60258.3	39863.7	62525.4	55246	95224.9	31331.2	30360.3	72647.8	54371.9	34070.6	64888.2	23883.9	46343.6	28048.7	37535.5	28378.7	41973.1	21340.5	70911	27579.3	22564.6	29969.7	29537.6	64072.1	63818.6	82579.8	105935	57403.2	44471.3	63989.8	58929.7	59713.6	57544.1	77178.4	46761.7	87051.8	154324	121719
A0A0D3AG63	22972.7	216405	157971	138004	157215	101830	193110	188132	214272	74677.4	212754	96240.9	28383.7	159604	Filtered	202716	90205.3	68978.6	45688.3	59912.1	65977.5	84213.6	81448.1	152209	43202.3	167391	77697.7	169231	Filtered	85840	125456	285146	38488	65298.1	73775.3	Filtered	38660.9	134222	112473	81194.7	Filtered	Filtered	Filtered	Filtered	Filtered	Filtered	Filtered	Filtered	Filtered
A0A0D3AGR3	Filtered	Filtered	Filtered	Filtered	Filtered	Filtered	Filtered	Filtered	Filtered	21186.4	Filtered	8843.11	Filtered	13150.7	Filtered	12729	22071.2	20875.4	23720.4	30365.5	Filtered	21030.8	Filtered	28852.2	28504.9	32145.4	Filtered	16521.8	18134.4	15156.7	Filtered	14638.5	Filtered	14022	Filtered	34267	Filtered	53518.5	36109.4	Filtered	29596.1	Filtered	Filtered	Filtered	45101	Filtered	34403	17208	Filtered
A0A0D3AHD4	178674	242623	456004	Filtered	256661	1.5406e+06	160819	671632	186694	378505	346383	292095	244289	82576.6	Filtered	202793	319344	523400	375677	509995	501768	225537	181786	157448	244715	302722	348286	312101	189865	757121	499658	408071	99371.2	6222.62	82590.5	233086	293792	162734	332342	375457	669573	722426	421019	417299	558001	732076	629458	734424	232111
A0A0D3AHD8;A0A0D3AZB0	Filtered	Filtered	Filtered	Filtered	Filtered	248091	Filtered	Filtered	235601	159129	Filtered	7774.89	Filtered	Filtered	17364	Filtered	10392.1	14400.9	12168.5	6792.26	Filtered	14807.4	9551.56	Filtered	26937.4	24431.7	28713	Filtered	Filtered	62303.8	239085	Filtered	30026.5	19190.8	23445.9	16447.4	15979.1	15077.5	Filtered	Filtered	33522.3	52687.6	68575.2	93359	62310.6	59226.7	16297.9	28694.2	15092
A0A0D3AHI5	138824	116032	226841	172560	135791	104247	87857.5	225296	489210	89740.3	196174	112487	78419.5	227223	108107	219441	50168.9	44539.7	45939	43187	54186.8	74799.4	61502	98999.1	61912.8	53320	23672.1	12817.3	89037.6	28588.1	109519	89946.4	83472.7	109638	130740	54248.8	92674.2	200909	117364	150080	38636.8	54111.8	36393.5	85080	53809.5	34352.8	71769.3	30616.7	24687.3
A0A0D3AHJ2;A0A0D3BAC7	Filtered	34323.4	1	Filtered	Filtered	Filtered	Filtered	Filtered	1	140783	1	50564.2	28548.7	Filtered	Filtered	43118.6	50333.4	39744.4	25231.6	22079.4	Filtered	36930.3	40451.1	Filtered	19223.5	59542.4	51312.7	110260	77254.7	32260.9	Filtered	131623	37036.4	36432.8	27403.6	25982.1	35641.8	Filtered	Filtered	52844.5	Filtered	65178.4	Filtered	45538.9	25808.1	Filtered	43759.7	17210.8	1
A0A0D3AHJ4	224796	223344	72217.6	188509	150325	379.94	119876	258187	66564.3	58791.4	192357	140072	131436	162750	107042	136543	149495	114465	73145.5	114754	88349.8	112756	136194	176818	130671	81994.5	140589	149307	96403.1	61013	54371.8	140041	61435.1	181617	132492	115694	134084	120140	202809	147341	153717	140898	169077	222660	200830	203725	210010	215366	140323
A0A0D3AHP7	80901.4	Filtered	67739.8	Filtered	76242.3	166989	Filtered	64130	57242.1	87245.4	88770.3	87809.2	88729.4	91601.6	77755.1	107406	108125	101738	87885.8	99151.5	83417.2	125072	123845	114247	118956	107333	128700	99560.4	159364	110496	88653.9	135405	43544.2	53488.4	49414.7	30508	65885.4	41572.6	57526.6	71306.6	88772.4	120137	97430.3	Filtered	53973.9	51884.2	58941	48656.8	51349.8
A0A0D3AHS1;A0A0D3EHT2	505364	638200	838118	848625	697112	607328	582306	680960	682883	415237	505460	300514	331473	293766	299597	329589	341585	356871	283454	334004	322489	323687	302165	409909	488030	390503	494748	382559	260326	451545	299038	433599	506169	721476	586823	467211	395645	457039	526737	532926	706335	506844	825936	1.03164e+06	955971	950491	989011	1283090	326120
A0A0D3AHT8;A0A0D3AZR3;A0A0D3EHV5	911012	608220	726030	512055	1.03684e+06	1.00462e+06	1.01852e+06	736378	760588	763761	834557	986256	945383	798258	931663	874076	663142	953105	715861	845765	753770	661044	771975	700671	699944	878314	813359	761799	621527	930448	561249	691556	576116	485600	683348	830952	658750	594676	591066	756158	748796	644625	458674	443420	508587	541392	507949	535355	648328
A0A0D3AHV2	24924.4	46940.1	1.10325	84648.5	1.91481	Filtered	Filtered	47536.4	41874.4	16495.9	22183.9	10952	27825.1	7779.54	4716.65	17118.4	89677.5	91546	55569.1	45740.8	74940.6	166572	118910	127748	241967	132667	218382	184458	193931	114884	174897	246525	19954.5	141738	Filtered	84297.8	273108	156442	284245	76586.4	24536.5	57737.4	39615.2	99622.5	65517.4	91175.6	101242	66114.4	71322.7
A0A0D3AI27	14545.6	33447.9	Filtered	Filtered	106024	Filtered	Filtered	Filtered	Filtered	83175.9	30717.5	141027	140744	36300.1	104285	47086.1	104354	215324	136143	202552	135315	76851.9	81049.5	92320.6	78317.9	126010	102586	168393	83512.3	176501	104275	27961.6	168651	74196.3	106698	164329	103984	109838	119703	94390	84187.1	81409.1	39748.7	47469.8	52127.3	59641.1	59310.2	48866.2	131518
A0A0D3AI55;A0A0D3B083	262576	159599	146805	166021	260394	Filtered	173945	155677	Filtered	89152.1	82990.5	89694.4	142784	95986.9	111467	119095	49948.1	100945	67600.4	111662	94963.1	68337	61637.7	60920.7	112970	87216.8	110954	110735	89334.9	131450	36880.5	75010.5	94923.6	98239.4	88296.1	117116	67296.5	120273	149746	115574	227033	164447	156057	305608	272474	270460	279088	354215	106982
A0A0D3AI61;A0A0D3B091	1	52853.5	49073.1	80462.1	48714.2	Filtered	64899.7	66152.9	Filtered	56836.1	32540.6	47001.5	47520.3	49417.8	25088.1	37797.6	9340.29	16788.9	18461.6	9428.35	13696.9	22221.4	11099.3	19325.6	44188	20819	44512	143141	29734	30152.7	31604.5	51372.3	Filtered	17587.8	Filtered	13028.1	Filtered	45201	31327.2	25199.8	88526.3	69705	63601	Filtered	24800.3	58033.3	44983.4	41386.7	28263.6
A0A0D3AI64;A0A0D3EGW0	Filtered	44267.6	50645.1	Filtered	Filtered	326296	Filtered	1	416589	171639	48439.9	71110.1	50343	46512.1	90620.1	57461.9	62995	69402.3	135786	104968	134447	57398.4	76940.8	73203.2	80661.2	55386.1	70322.4	75959.4	67894.2	61954.2	282333	Filtered	102202	84496	77881.4	138361	88849.1	74179.7	52410.7	7201.96	35459.3	57928.1	202637	148843	64900.9	81193.2	37300.1	82349	73298.3
A0A0D3AI66;A0A0D3B098	Filtered	67877.5	38093.4	16874	30121.9	Filtered	54533.5	46683.2	45329.4	43122.1	32327.2	51417.4	20977.3	31899.6	48731.8	18668.8	Filtered	8083.34	11982.6	17125.3	14584	16071.6	31089.8	17244.8	1399.02	10328.5	7960.13	Filtered	Filtered	31022.2	9054.27	17858.3	13141	11479.5	25977.6	32360.7	4784.77	Filtered	Filtered	11350.1	99558.1	98164.4	192172	87860.5	49883.5	130922	86744	45814.8	92524.7
A0A0D3AI86;A0A0D3AI87;A0A0D3B0C3;A0A0D3B0C4;A0A0D3EGT1;A0A0D3EGT2	339093	58220.9	422790	329089	122973	4.074e+06	239743	171667	1.31654e+06	1.00582e+06	40015.9	132790	113734	116558	86481.6	104248	119225	86245.6	130948	156514	97843	134588	55357.5	104070	132598	126493	178495	109705	65839.7	259359	1.19837e+06	181453	121721	189426	80442.9	125829	93880.1	88989.7	63172.3	35773.6	154850	128237	124313	309503	166285	150493	115667	206345	113683
A0A0D3AIB3	Filtered	7781.15	87170.9	1	Filtered	877539	7595.68	Filtered	518432	261298	10982.6	12858.7	15603.7	3834.1	18662.6	17878.1	14734.3	34188.3	13724.6	13292.5	32440.7	3741.47	3887.91	5680.62	5737.65	33416.8	11448	5746.16	2561.81	43077.4	233090	9767.03	24748.9	29688.6	9160.69	19450.8	16136.1	6947.85	4572.86	Filtered	7982.35	38425.9	18996.5	16701.2	1	20667.5	Filtered	1.08167	12113
A0A0D3AID6;A0A0D3B0F6	134045	80695.8	65240.3	122617	Filtered	Filtered	Filtered	92085.8	Filtered	46243.2	45312.1	29253.3	Filtered	13425.5	27352.3	74588.9	Filtered	49725.6	43596	32817.8	63363.8	53401.5	53239.2	35205.6	Filtered	33121.5	51718.2	41781.8	Filtered	71344.4	Filtered	Filtered	54351.2	89826.2	54557	42632.8	48322.9	51134.5	91324.2	46375.7	Filtered	75770.1	128949	103905	155755	124872	147861	169348	109340
A0A0D3AID9	Filtered	Filtered	Filtered	20738.4	Filtered	Filtered	Filtered	Filtered	Filtered	2012.86	9992.16	4063.84	Filtered	Filtered	Filtered	7528.95	10588	7795.97	Filtered	Filtered	2029.85	Filtered	3730.36	Filtered	3604.67	7113.69	Filtered	9074.43	Filtered	4112.61	Filtered	Filtered	Filtered	10860.9	9864.98	Filtered	Filtered	Filtered	Filtered	1955.07	Filtered	Filtered	Filtered	Filtered	Filtered	Filtered	Filtered	Filtered	726.418
A0A0D3AIF5	79226.5	30355.6	45392.9	26175.2	22074.4	3136213	806243	30455	342272	199142	23774.3	56278.2	18320.6	20362.4	25339.2	20177.6	32197.7	39398.1	66484.2	62267	63044.8	28150	17545.4	44366.4	16896.6	34288.1	36885.5	28986.4	32503.4	35289.4	149620	40006.9	19657.7	17829.1	19540.7	34581.8	102259	16970.2	14540.4	16297.5	59914.6	90063.9	50732.1	68329.5	47596.4	57914.3	145438	38791.3	73896.5
A0A0D3AIH8;A0A0D3EGC4	293197	185100	230956	374566	277508	365826	166644	113009	307759	71194.1	121807	85685.5	78081.6	82002.1	63023.1	84005.4	153091	106911	152609	130825	115969	119110	107998	189218	156382	154404	158812	38502	60113.6	79136.9	88917.5	142338	45652.4	130300	105477	97085.4	140522	52456	54815.3	106513	204854	226749	236515	210300	231519	102447	174896	248915	169816
A0A0D3AIK6;A0A0D3DCU5;A0A0D3EG80	1177.15	Filtered	1987.37	Filtered	Filtered	Filtered	Filtered	1	68345.8	56686.9	Filtered	Filtered	Filtered	Filtered	1	Filtered	Filtered	Filtered	1	1	Filtered	1	1	6945.81	12291.5	Filtered	Filtered	1	6741.49	1	18110.7	Filtered	1	1	Filtered	1	1	Filtered	Filtered	Filtered	Filtered	16270.7	Filtered	31047.3	Filtered	Filtered	Filtered	Filtered	1
A0A0D3AIM1	6527.03	2099.79	Filtered	Filtered	Filtered	Filtered	Filtered	11366.9	10619.3	Filtered	1	7680.46	Filtered	1	1	21008.4	6494.31	9780.11	6039.43	4616.61	5824.34	19836.9	14867.5	10885.2	5517.04	17308.5	10303.2	7674.94	6589.47	11654.2	18546	5437.54	13643.1	9880.85	15485.4	9627.71	10787.9	1	11526.7	1	1.02088	Filtered	Filtered	1	Filtered	Filtered	Filtered	Filtered	23208.6
A0A0D3AIM7	244506	149627	138844	242873	231963	229951	152794	219011	377802	136145	259602	164279	189576	282955	148914	207847	54014.4	97465.7	54659.6	53169.7	45136.3	80038.7	104917	67047.1	123183	126695	125862	150602	82658.2	107550	142489	110654	127354	98835.4	134439	139761	201901	273344	183241	207654	178455	116060	145963	165871	237314	238942	172788	229888	137205
A0A0D3AIS1	239964	174487	106842	244111	258595	339822	171556	308472	131898	162096	231023	123503	176141	126821	91426.1	110458	127224	122051	109702	136892	146153	128499	124329	156753	127188	112465	147113	122332	104836	98663.2	107955	172863	94420	180476	103262	102361	119896	135335	136354	155011	139932	126529	166478	150350	154289	149931	146651	230869	103278
A0A0D3AIT1	Filtered	Filtered	Filtered	Filtered	Filtered	Filtered	Filtered	Filtered	Filtered	Filtered	Filtered	Filtered	Filtered	Filtered	Filtered	Filtered	20367.3	5336.69	14416.1	17241.7	9650.01	9318.3	24244.9	4897.84	Filtered	Filtered	Filtered	Filtered	Filtered	Filtered	Filtered	Filtered	60501	18508.7	43923.5	Filtered	18974.3	Filtered	25952.4	50174.1	Filtered	Filtered	Filtered	Filtered	Filtered	Filtered	Filtered	Filtered	70840.7
A0A0D3AIU3	73242.8	37031.6	Filtered	Filtered	Filtered	Filtered	Filtered	Filtered	Filtered	32722.5	50355.1	22878	46638.1	Filtered	27632.8	49962.1	55475.2	31760.3	44182.2	43332.8	45939.4	58553.4	49735.6	60393.9	90347.7	46090.7	76490.5	54376.6	59833.2	31629.8	42064.8	78698.8	47022.5	73720.5	22803.4	31205.1	62563.9	61572.3	54106.1	Filtered	Filtered	87964.6	98679.3	76502.5	Filtered	Filtered	Filtered	Filtered	112483
A0A0D3AIU4;A0A0D3EFS9	Filtered	Filtered	Filtered	Filtered	Filtered	Filtered	30096.9	Filtered	242313	77791.8	30564.4	56124.7	62485.9	63390.9	Filtered	37414.4	40761.3	28665	53279.9	59089.9	63402.8	20946.3	15537.6	Filtered	17446.5	Filtered	40693.7	Filtered	11891.7	Filtered	Filtered	Filtered	27467.2	39267	42807	103124	40526.3	58474	39465.9	Filtered	Filtered	Filtered	2988.72	Filtered	Filtered	40383.7	Filtered	Filtered	56070.2
A0A0D3AIV0;A0A0D3B0Y8;A0A0D3EFS3	27178.5	55504.9	89805.4	9800.08	11028.7	601423	37871	41036.4	173654	194717	9972.05	48975.1	44714.4	29196.2	46534.5	31323.4	37908.4	52707.4	63103.5	81317.2	58969.9	33272	16641.3	30314.6	33597.5	51059.5	34258.1	43721.5	24338.1	72871	164657	50827.2	18942.5	24024.1	4206.66	33812.5	19108.4	22045.9	15701.6	8972.65	97908.8	118884	87318.2	76761.6	57399.4	64840.7	55317.4	37422.9	53337
A0A0D3AIV6	Filtered	1946.16	Filtered	Filtered	Filtered	Filtered	Filtered	901.637	4322.3	Filtered	1906.77	Filtered	Filtered	Filtered	Filtered	887.898	1382.21	584.976	1104.16	Filtered	370.068	Filtered	2055.22	2011.16	Filtered	621.316	2644.14	Filtered	Filtered	Filtered	574.557	Filtered	325.966	Filtered	Filtered	514.34	2139.53	2380.46	2879.92	1496.14	Filtered	Filtered	Filtered	Filtered	Filtered	Filtered	Filtered	Filtered	Filtered
A0A0D3AIW3;A0A0D3BJG4;A0A0D3EFR0	248590	222430	301070	313828	262543	88832.8	295994	269265	Filtered	220798	276327	202444	181441	221473	164292	191114	150850	193143	175863	120733	106241	127636	248679	147551	156440	192392	297631	248739	198155	202220	190338	181933	186952	414287	175930	176890	317893	354301	230190	170951	319097	141357	477290	435029	310877	527436	546470	512431	138257
A0A0D3AIX2;A0A0D3BHC3;A0A0D3CQB0	291493	37647.4	145785	247606	262819	293879	166031	91654.5	7223.43	Filtered	Filtered	5439.79	Filtered	37602.3	Filtered	3836.01	Filtered	Filtered	6381.22	3566.76	Filtered	Filtered	Filtered	8603.91	Filtered	Filtered	Filtered	Filtered	Filtered	8987.58	Filtered	Filtered	7055.64	5857.74	Filtered	12816	13811.8	5637.8	2746.65	Filtered	121270	Filtered	Filtered	Filtered	146782	35194.2	48702.2	333613	10124
A0A0D3AJ17	385868	194686	152735	280793	339661	346641	158924	491517	302468	114380	459998	215190	184578	583801	159921	346746	273391	127839	156206	132661	107584	339509	304444	331786	403234	202974	370371	184184	366296	145674	338033	339919	134723	295901	297807	163211	276204	369291	307282	343921	205019	110530	198339	319431	227377	228001	192700	387118	182021
A0A0D3AJ33	321443	311903	224486	91987.4	391211	449955	248678	276766	1.36168e+06	201087	189430	315256	348160	277508	455831	244210	439593	510159	630559	689675	809487	448402	512138	472493	177411	367883	314130	243568	217392	529237	392998	354328	338513	271986	368334	544520	641045	302100	361096	488069	334030	323092	173140	130499	239509	223258	211988	280888	672205
A0A0D3AJ42	1.02131e+06	763813	603054	1.1069e+06	891639	810841	1.34378e+06	759286	Filtered	Filtered	Filtered	59709	Filtered	116885	Filtered	36325.4	165517	57933.2	149522	49356.2	77725.3	227992	116203	277389	162918	423558	618271	163409	358513	129900	72744.7	223829	167436	380973	204835	171258	141248	191026	147933	142377	350759	315326	832868	1.0731e+06	505196	1.19088e+06	337667	456729	102592
A0A0D3AJ53;A0A0D3EFE4	Filtered	66987.5	154972	170574	Filtered	244313	66023.6	42529.3	152654	112386	45766.9	59143.3	63628.1	93908.8	1	55636.3	66982.7	59593.7	153486	126795	91344.4	74591.2	77359	76472.8	78738.7	85292.6	71202.9	87375.9	84404.1	105347	93836.1	62971.6	Filtered	43591.6	74009.4	64981.9	95044.7	97124.3	107382	70117.3	90867.3	77983.2	120764	118009	132536	96330.1	104609	81529.6	144322
A0A0D3AJ64;A0A0D3B185	Filtered	955.377	1	1	Filtered	Filtered	Filtered	1	4922.41	93772.8	74055.5	69249.2	89647.4	1	48689.8	72948	51926.3	77932.6	80903.5	84968.2	148269	59050.9	65447.4	77330.6	50156.4	27471.5	46567	39574.2	69238	42448.3	39380.7	55124	51841.4	59974	Filtered	69587	84378.7	74977.5	110388	59899.1	36489.8	6969.79	Filtered	1	1	Filtered	2591.78	1	43614.7
A0A0D3AJ74	71924.8	31344.7	98069.4	Filtered	138820	118513	55244.2	29341.7	17056.7	22223.7	47074.2	42523.9	47912.2	47368.3	49888.7	46664.5	44495.9	90534.5	52575.9	96480.8	17457.5	27784	33828.7	43823.6	33142.3	48878.9	45263.7	59358.1	23143.1	43115.9	44161.6	35363.4	55054.9	28032	43883.1	62590.4	31299.8	52960.6	27652.3	66743	119840	90569	58271.7	45776.7	Filtered	66222.4	79324.8	68783.2	86548.2
A0A0D3AJA4	483074	190904	182776	168924	283819	415228	186624	272362	80741.2	49292.7	165366	182909	111360	234559	76919.9	58532.5	85727.5	88279.3	66814.3	89969.7	116659	83227.6	127958	34284.9	135491	82110.5	93874.6	88482.6	158684	112316	87198.7	83617.2	18017.1	29602.8	159675	14436.7	50240.9	73136.2	65303.8	309249	39972.2	46920.2	62909.1	30702.2	92703.8	42442.8	105892	84625.3	33631.8
A0A0D3AJC2	197026	136202	172442	189824	281082	188336	192703	218328	455163	82487.6	93971.5	96662.8	109999	108954	77397.9	120941	116215	113976	79290	118330	140824	119659	65768.7	120564	90083.9	88354.2	105919	106114	64312.2	117309	71333.8	45659.4	140575	95905.9	104510	94869.2	120709	77430.8	99404.5	89278.7	149596	152664	219516	287342	354053	243565	261341	195330	84018.6
A0A0D3AJC3	Filtered	Filtered	17485.3	Filtered	Filtered	Filtered	Filtered	Filtered	64802.1	1696.72	Filtered	8139.6	Filtered	3194.81	926.27	Filtered	Filtered	Filtered	24393	Filtered	9596.28	76987.4	Filtered	28730.6	52378.3	33932.8	7264.67	Filtered	36914.4	Filtered	73520.2	72434.1	39965.5	41660.1	22175.1	20741	Filtered	34638.5	42053.9	28718	Filtered	111278	97871.8	46804.2	48303.7	106741	Filtered	Filtered	28681
A0A0D3AJD2;A0A0D3BBW7;A0A0D3BZG9;A0A0D3CJ64	Filtered	25702.7	Filtered	Filtered	Filtered	Filtered	Filtered	Filtered	16238.6	96006.6	47697.6	113108	111928	Filtered	102913	98662	90813.8	113651	113083	128008	161312	52600.8	62157.1	82840.1	25200.7	82667.9	40178.8	12295.2	39404.2	43828.6	44222.6	61580.2	18140.3	27070.6	44139.1	94639	54570.9	20386.5	22047.4	2606.38	67402.9	126050	43330.7	Filtered	Filtered	Filtered	Filtered	Filtered	63556.6
A0A0D3AJD8	237986	177226	255283	540897	342301	202599	304446	145103	783249	67088.2	196570	178525	141746	288828	223117	244308	171061	240508	237322	276666	260193	202493	200761	161476	194650	250200	185328	343242	165995	300399	135614	153134	545041	155198	183125	165039	84615	75453.7	140849	122654	337866	500190	316698	350607	468977	401857	311371	601986	227621
A0A0D3AJE9	113851	64807.8	32441	90931.8	82732.6	Filtered	37654.9	Filtered	27692.2	64869.9	81308.3	79197.5	73654.4	70439.7	62122.7	84864	70014.9	23669	64496.5	43012.9	23019.3	58572.9	56030.3	72443.8	52905.7	68917.8	Filtered	6789.81	18982.8	15539	16649.7	43705.1	45953.1	110174	52620.4	60520.9	70891.2	52407.3	63073.2	73917.7	145151	52905.5	98796.9	156472	134817	170593	144643	147650	50459.3
A0A0D3AJG1	373612	166742	198165	244929	299173	533483	168294	140549	890785	108120	112160	88135.7	117316	133910	162110	140475	140571	109910	118666	129281	183751	177970	198982	169721	136610	99215.9	91867.2	128925	112347	127809	163490	146281	173098	166850	178571	190147	291433	182614	201727	219731	331427	111494	80916.2	181418	218259	90951.2	273934	213889	206719
A0A0D3AJG2	Filtered	56305.5	Filtered	179629	Filtered	499198	Filtered	438008	532153	279097	8096.16	20367.8	57474.9	9566.74	19541.9	14606	27918.4	51020.4	69075.7	47112.6	68161.2	42867.5	42957.5	30654.8	22875.6	52564.7	70048.5	53192.3	39764.2	119208	272229	60683.9	12634.8	36242.7	7001.88	36971.6	37190.9	10438.3	39240.7	3103.78	37150.6	97065.3	83509.7	133349	58052.5	115634	1.48643	469151	36345.4
A0A0D3AJM2;A0A0D3B1P9	2.57009e+06	3223842	1.98875e+06	2.94751e+06	2825951	2.84771e+06	1.36934e+06	2972067	211513	92380.5	125403	278308	458601	406119	592277	912849	569461	696090	148393	517778	125646	942644	709762	510046	1.45147e+06	719018	409839	Filtered	1.6587e+06	1.20667e+06	876119	1.81753e+06	908764	764791	1.53899e+06	691200	542494	171380	1170746	1.40592e+06	59394.4	665676	443194	1263965	1.01736e+06	Filtered	2.55419e+06	1923354	Filtered
A0A0D3AJS8	Filtered	Filtered	1	Filtered	Filtered	Filtered	Filtered	Filtered	46866.1	11082.3	Filtered	Filtered	Filtered	Filtered	Filtered	Filtered	9343.55	9932.34	1	3394.54	15101.2	32014	30692.6	1	17533.5	18774	14407.8	Filtered	Filtered	15231.4	20643	52509.9	Filtered	Filtered	16915.5	15005.8	1346.55	Filtered	Filtered	21844.3	Filtered	Filtered	23584.1	Filtered	Filtered	Filtered	Filtered	Filtered	26423.7
A0A0D3AJX7	13084.6	32959	26057.7	Filtered	Filtered	Filtered	Filtered	Filtered	Filtered	18347.5	Filtered	25666	32276.5	23375.8	32053.7	23065.1	18043.2	37245.9	28984.4	20046.4	28712.6	28725.1	11714.6	14536.2	17221.3	41963.9	33830.3	8846.78	19766.1	35561.6	13419.4	28329.4	30005	17577.2	24573.8	40012.8	27986.3	24374.9	33095.5	30027.3	32002.7	29006.3	15695.4	28691.3	21971.2	15420.9	33271.2	Filtered	43940.6
A0A0D3AK24	250804	109281	105384	79612.9	168335	24888.6	225414	86706.6	169416	182552	120140	228570	163409	108610	179769	130373	189117	206622	261030	269613	207919	222820	193764	179655	127919	153032	96160.2	72857.2	119983	70462.3	125028	161524	74005.6	141978	149132	231221	200689	135668	148272	164043	164839	134646	65661.8	101796	72159.9	77413.6	37578.9	123160	198245
A0A0D3AK52	52042.1	58814.7	24921.8	42655.8	58575.5	37545.4	1976.16	54595.2	82693.8	25520	53322.5	25382.2	22650.1	51788.4	21528.8	35068.8	22500.9	8877.64	16253.7	15884.1	18174	28252.3	25887.7	31460.7	15821.9	19514.7	13195.5	15126.9	28067.2	1	28644	12224.2	14277.5	25443.2	19536.5	15995.6	34763.9	40923.6	24968.6	27722.6	58361.9	38563.1	29748.5	37296.9	49008.4	48434.6	44248.3	44024.3	17886.4
A0A0D3AK59;A0A0D3B239;A0A0D3DWT0	468616	Filtered	112141	413625	527782	1.03844e+06	167593	114146	Filtered	1	Filtered	Filtered	Filtered	50138.4	Filtered	Filtered	Filtered	Filtered	Filtered	Filtered	7853.89	Filtered	Filtered	10471.5	Filtered	Filtered	Filtered	Filtered	Filtered	Filtered	Filtered	Filtered	Filtered	3488.41	Filtered	Filtered	Filtered	7551.23	Filtered	Filtered	133016	Filtered	Filtered	Filtered	278460	Filtered	46883.2	456906	Filtered
A0A0D3AK68	3.42649e+06	3.99428e+06	4207445	4897359	4691387	1.84649e+06	3.47146e+06	2.29869e+06	162321	717782	585982	549940	853169	892198	830289	334639	750964	705283	1.17615e+06	1.02306e+06	663071	551333	542385	314742	728641	553277	367368	873946	447040	461540	475843	397139	102457	645808	343744	552887	168740	429754	158939	302480	1.2502e+06	299312	904865	850778	650254	1.97352e+06	450425	614653	359551
A0A0D3AK73	332312	5932.15	77778.1	161593	407059	102726	120238	75688.5	108406	61132.3	153188	69889.4	83724.7	133489	86528.2	6446.61	1	43138.2	27664.2	69274.7	43471.7	Filtered	2987.53	4407.57	4194.59	10137.9	1626.53	12191.7	26568.1	7618.36	Filtered	9015.38	14819	107654	Filtered	1620.37	1	Filtered	1035.23	Filtered	Filtered	1	Filtered	Filtered	Filtered	8900.13	Filtered	15516.4	60314.7
A0A0D3AK84	75696888	46902216	40774144	73024728	60027240	55338900	43138228	65985392	33458266	22044026	49034928	21156418	24257774	49026480	23719396	33059130	34975168	19549436	21495780	25175564	19345656	31447956	29823176	36058944	42596320	25136694	41469216	31109482	33047812	21921052	30366094	33917240	23539736	43106208	34400704	23439094	36975616	44097176	36500328	38508684	30523742	18931486	37667824	51777288	42166756	43288204	42689076	44664744	25553880
A0A0D3AKA0	50979.3	65227.9	77163.4	85805.8	148603	121342	88891.5	95291.1	Filtered	Filtered	43189.8	32535.3	28589.6	21079.7	24746.9	37063.4	50938.5	56998.5	53124.6	55626.3	51182	63211.9	72537.2	64583.9	50113.9	59375.9	Filtered	68726.6	77977.5	69518.5	49577.3	101889	61943.9	85742.3	102197	58621.4	57210.5	83262.1	76913.1	105609	110246	58926.2	87849.3	53325.3	58420.3	56368.4	63023.7	44558.6	57262.1
A0A0D3AKA2;A0A0D3EDL1	Filtered	101151	Filtered	Filtered	Filtered	Filtered	Filtered	Filtered	55152.3	177979	118307	139459	79933.4	131979	73718	96618	46914.7	92517.3	100079	67461	52455.1	75019.3	50145	97276.6	93880.3	107038	101550	209920	98171.2	183094	119816	112687	8884.94	57341.7	36175.2	101837	Filtered	32733	20747	Filtered	121116	29574.3	115925	250098	237357	139025	144135	298859	108589
A0A0D3AKE1	126326	19819.3	19708.7	31934.7	96504.8	Filtered	33197.9	Filtered	33657	62516.5	45560.1	53393.7	84741.6	101652	77733.2	94490.7	64824.3	49107.2	12619.8	59756.7	55454.6	75194.7	55979.9	54111.7	69388.2	53653.1	69684.5	149690	58046.9	75523.5	81102	105881	59909.4	80735.4	109478	60105.6	49337.8	103429	113813	139303	40855.5	24628.4	25056.3	19182.5	10845.9	36098.4	24930.8	124453	40357.1
A0A0D3AKE2	25975.3	135590	117099	54015.9	135961	70750.4	339942	192595	35707.8	92983.9	85524.4	66331.5	144574	81514.5	61368.9	98110.6	85441.1	70762.5	69719.4	84550.6	83146	90657.3	103219	62098.8	76740.1	61398.8	81329.4	79527.4	64033.9	116321	73129.8	99927.5	86989.8	79330.2	98166.2	88221.7	84149.9	124798	116352	113274	137729	111696	90507.4	89937.2	108478	130811	173172	467144	93667.2
A0A0D3AKG8;A0A0D3C8H8;A0A0D3EDD7	Filtered	84213.2	34267.8	Filtered	Filtered	Filtered	Filtered	Filtered	Filtered	187708	57134.8	124322	107991	Filtered	93299.9	79175	96794.7	102471	166286	119978	108960	44978.4	36365.1	98561.9	35994	82286.2	35229	22667.6	51328.7	85549.8	30636.9	Filtered	92287.4	Filtered	71545.4	170768	78187	68892.1	84754.2	32102.7	14325.9	49754.1	1	15377.9	945.879	Filtered	Filtered	Filtered	113026
A0A0D3AKL6	Filtered	Filtered	Filtered	Filtered	Filtered	Filtered	Filtered	Filtered	28028.1	2263.68	Filtered	7127.55	10304.9	Filtered	8020.33	Filtered	3000.92	6058.91	2978.71	5367.36	11378.2	Filtered	5529.21	8382.71	Filtered	8929.95	Filtered	Filtered	Filtered	Filtered	7848.08	1	12436.3	3634.9	Filtered	13632.6	8982.77	Filtered	Filtered	Filtered	Filtered	Filtered	Filtered	Filtered	Filtered	Filtered	Filtered	Filtered	3419.64
A0A0D3AKU7	Filtered	Filtered	Filtered	Filtered	Filtered	Filtered	Filtered	Filtered	Filtered	64905.5	123105	66090.4	51503.5	122441	45228.5	80479.9	Filtered	Filtered	Filtered	Filtered	Filtered	18206.8	19700.3	8380.7	45750.2	16239	26439.5	30352.2	73512.8	Filtered	45189.8	41242.8	15112.9	40318.3	50347.5	20454.7	48296.9	84666.6	35902.3	66250	Filtered	Filtered	Filtered	Filtered	Filtered	Filtered	Filtered	Filtered	45793.2
A0A0D3AKV3;A0A0D3B2I9;A0A0D3ECX4	Filtered	1.15766e+06	26567.2	6525.44	Filtered	Filtered	87857.1	2.03414e+06	595868	405380	256994	257686	184891	78986.8	158514	217237	207156	791829	255624	136366	170482	69112.6	337807	360471	34147.6	770486	92128.9	96909.6	115525	144955	71899.3	125526	218593	3919.68	6897.97	730674	1.17636e+06	29147.7	39236	8101.65	122147	248105	118271	52694.8	133190	52740	135171	Filtered	84875
A0A0D3AKV6;A0A0D3DNY5	67483.6	85614.6	45817.3	86112.6	Filtered	Filtered	37059.2	114913	9289.27	58099.2	51700.5	56533.3	53072.9	88449.6	102194	48139.7	55881.5	50576.9	28862.6	66404.2	41768.2	38295.8	48337.5	61950.2	30212.1	103491	44656.7	26868.8	62979.7	43837.1	65425.3	75211.9	322.494	248081	82652.9	71055	89133.2	109524	86610.3	82653.4	81436.3	98258.7	83454.7	128290	111879	128635	117054	990.837	8614.45
A0A0D3AKZ8	12065.4	7512.98	4317.02	5706.06	5842.12	4842.32	8062.18	6011.02	25705.9	12595.3	22139.2	12372.9	10855.2	16102.7	8897.66	12672.1	1986.75	7983.17	4829.51	Filtered	3703.2	2696.93	3110.13	1561.27	17890.9	9298.87	12650.7	18709.3	16377	9418.15	17256.7	8153.77	15201.1	18426.2	17379.5	14442.9	20998.7	20176.6	15015.1	16176.4	5293.01	5566.05	7956.98	10514.8	9324.37	8166.12	12276.9	16968.1	12900.1
A0A0D3AL08	Filtered	Filtered	Filtered	Filtered	1	Filtered	Filtered	Filtered	1.57704e+06	251660	351916	419582	414069	553237	242934	368253	95114.9	172149	88718	84403.4	62296.3	162946	91950.8	103093	217308	126736	142608	180773	153957	143369	123156	229796	79626	106648	94048.8	95604.2	138523	149728	78276.2	187429	82950.1	43303.9	214409	72329.5	Filtered	11854.3	64144.1	Filtered	105242
A0A0D3AL91;A0A0D3B2U9;A0A0D3ECC9	Filtered	Filtered	Filtered	Filtered	Filtered	Filtered	Filtered	Filtered	118897	72246.2	Filtered	Filtered	Filtered	Filtered	Filtered	Filtered	Filtered	Filtered	Filtered	Filtered	Filtered	Filtered	Filtered	Filtered	Filtered	Filtered	Filtered	Filtered	Filtered	Filtered	58440.5	Filtered	Filtered	Filtered	Filtered	Filtered	Filtered	Filtered	Filtered	Filtered	Filtered	Filtered	Filtered	Filtered	Filtered	Filtered	Filtered	Filtered	Filtered
A0A0D3ALA5	Filtered	22878.9	22769.3	23653.5	Filtered	Filtered	35643.6	27573.2	21268.3	10889.3	4600.08	17507.1	17127.2	21297.1	14695.8	6012.45	13196.8	18555	9130.97	7399.77	15523.3	10230.7	22818	14237.7	20003.8	14804.6	19840.2	12717.5	9986.83	20006.1	7019.44	29718.9	10999.8	17479.6	19915.9	16115.2	16324.3	8287.4	13429.6	24845.6	12531.7	17831.1	16698.3	12569.2	Filtered	9848.84	22825.8	Filtered	20059.8
A0A0D3ALC3	Filtered	Filtered	Filtered	Filtered	Filtered	Filtered	3233.62	Filtered	Filtered	Filtered	Filtered	Filtered	Filtered	Filtered	5138.37	Filtered	Filtered	1	Filtered	Filtered	Filtered	Filtered	Filtered	Filtered	Filtered	Filtered	Filtered	Filtered	Filtered	Filtered	88.0669	Filtered	5930.7	1009.72	1665.48	Filtered	Filtered	Filtered	Filtered	Filtered	Filtered	Filtered	Filtered	Filtered	Filtered	Filtered	Filtered	Filtered	Filtered
A0A0D3ALC6	743283	434921	433484	599346	577985	469681	425843	493139	213610	169043	329731	205876	261564	227782	234369	224562	247631	248922	207599	220786	219927	288510	219940	303414	318245	239672	376250	232684	226530	269948	210505	300273	237857	362159	326152	266333	303001	305518	335316	288916	386177	283458	406418	563478	528847	458439	524390	712395	263060
A0A0D3ALH8;A0A0D3EC30	1.02924e+06	826051	410687	1.33525e+06	844998	844217	935294	1.03575e+06	309173	206461	608877	274035	300648	722257	291442	311766	245554	152477	192031	158401	67686.7	277891	208557	249903	505516	247415	331597	413048	496371	177862	369069	177043	351755	551152	367216	355924	464837	714731	509246	1.20585e+06	1.053e+06	769144	1.24294e+06	1.8581e+06	1.34974e+06	1.53234e+06	903208	1.54939e+06	569122
A0A0D3ALK3	Filtered	100860	20282.9	174.328	Filtered	Filtered	2520.95	42224.7	30537.6	145337	86777.5	97671.9	129457	229872	85079.4	44653.1	2709.35	22254.5	6480.58	11921.9	8998.41	2145.65	3059.08	2917.43	4181.44	13296.7	8526.33	27457.9	17639.3	10156.9	14134.2	4071.81	60566.8	55331.9	Filtered	92175.5	3516.55	35364.9	66210.9	4265.62	Filtered	47328.1	71460.5	80116.9	58219.9	149804	39608.2	95681.2	33188.7
A0A0D3ALK4	Filtered	279084	267626	575959	535613	330494	236814	445692	5046.92	118357	45993.6	70403.3	144384	103086	118177	34143.9	51665	42528.4	144491	82794.3	71613.1	25394.6	44987.2	39242.7	Filtered	41843.4	40112.5	52979.3	11862	92723.2	15383.6	Filtered	61402	93850.9	138729	83294.8	62571.6	85356.5	110168	114843	433226	327260	59640.9	21738.8	118848	412323	10508	215052	278517
A0A0D3ALV1;A0A0D3EBH8	Filtered	Filtered	Filtered	Filtered	Filtered	Filtered	Filtered	Filtered	Filtered	Filtered	Filtered	Filtered	Filtered	Filtered	Filtered	Filtered	Filtered	Filtered	1	Filtered	Filtered	Filtered	Filtered	Filtered	Filtered	Filtered	Filtered	Filtered	5770.85	Filtered	5654.93	23986.8	Filtered	Filtered	Filtered	Filtered	8371.97	Filtered	Filtered	Filtered	Filtered	10642.8	8924.23	7955.57	Filtered	Filtered	3255.11	Filtered	Filtered
A0A0D3ALW2	6008.04	31300.4	6633.7	11754.4	17307.6	29018.1	378996	24193.4	22579.4	27596.4	13726.7	15799.4	30183.4	13130.4	14167.5	1155.17	2835.88	11693.4	9071.58	10329.2	1	9927.68	1	5885.61	Filtered	11107.5	Filtered	40784	Filtered	20516.5	18852.2	19640.1	3483.19	7667.87	2335.96	16443.3	2738.89	16375.7	22684.4	21527.4	135148	358909	232206	210243	82858	Filtered	40684	126076	28108.9
A0A0D3ALX7	289710	180868	1	250515	44524.6	Filtered	65189.9	301172	2.14562e+06	149750	244692	111756	172135	122616	91840.1	61845.9	2595.58	115269	45184.7	Filtered	68402.3	Filtered	57528.3	9229.14	227482	8693.87	29357.5	110339	88065.2	106209	232351	22649.5	Filtered	24060.9	48626.4	2393.79	91030.8	110585	82548.9	79054.3	389161	417963	346711	573184	425241	449469	189463	232816	95169.9
A0A0D3ALZ4	Filtered	Filtered	Filtered	Filtered	Filtered	Filtered	14196.3	13859.7	Filtered	31064.6	34250.9	17953	22175.2	25947.7	17424.9	Filtered	7696.1	21363.2	13798.2	12814.4	Filtered	12985	16110.8	13141.5	Filtered	16598.7	18187.8	27342.7	21910.4	Filtered	23986	9315.92	16880.1	19562.8	13151.7	19485.4	17431.2	22896	19718.4	21131.2	Filtered	5895.09	16090.5	16945.3	11916.6	12280.1	18747.4	31241.4	25187.7
A0A0D3ALZ8	121639	99915.6	69644.5	120055	54125.9	1.08978	37358.7	91326	124968	54187.1	46692.4	37896.2	30513.9	64406.9	36481	69451.8	14912.5	39855.4	14151.8	2795.04	15141.8	26417.7	24141	43963.1	35636.5	38823.2	24411	104997	56504.3	55430.8	46867.1	46941	19612.4	26438.7	35564.7	31707.3	33021.2	47166.4	39513.7	52413.3	73879.3	35774.3	80520.7	74001.8	123034	20212.7	54017.4	96163.4	20121.2
A0A0D3ALZ9	131113	34552.1	184279	52257.5	191848	154139	149906	29660.8	163923	87410.6	62158.4	167657	127678	166404	141543	73261.3	123141	160115	236951	227685	212864	131171	76953.5	135041	83564.6	182493	116594	152530	131998	234453	107705	66064.2	162728	72643.9	113591	197026	91793.8	65596.1	67871.1	111200	230623	312747	188193	138316	147539	427220	120260	146260	240572
A0A0D3AM14	156071	66437.4	179197	98398.3	118440	63365	116034	46281.1	20777	60018.3	126158	134913	115421	165369	138613	106476	126685	112561	111477	122187	82938.3	118124	120577	82192.4	105949	107201	79565.1	127297	76254.7	111928	81171.7	108198	67795.4	58688.4	101964	53939.2	62407.6	87065.6	69083	103495	103557	161786	63367.9	105948	75680.8	74238.5	85547.3	77761	30097.6
A0A0D3AM47	1.31182e+06	939670	1189289	1.04865e+06	1.70118e+06	847074	1.34885e+06	989207	295040	536054	758012	799696	930462	692130	785019	714624	984863	1.00757e+06	870619	1.50579e+06	920385	504216	861466	988058	1.20156e+06	1.18289e+06	1.21728e+06	1.70452e+06	908745	1.47652e+06	726601	1.1464e+06	229389	428506	379135	210076	75533.9	256736	309646	377083	1.34568e+06	1371705	879941	786505	928786	982042	874170	967635	1.38489e+06
A0A0D3AM64	Filtered	Filtered	Filtered	Filtered	Filtered	Filtered	Filtered	Filtered	85541.3	49622.1	58840.5	56865.3	77493.5	61503.9	67095.8	49703.1	32297.1	45737.3	25846.1	69073.3	56806.6	41061.3	33784.9	44225.8	19985.6	30350.6	35393.8	17910.6	16009.3	50233	25879.3	21789.9	63319.3	26856	50030.5	55720.1	59909.8	25185.3	41253	15916.9	Filtered	7715.45	Filtered	Filtered	Filtered	Filtered	Filtered	Filtered	37852.8
A0A0D3AM67;A0A0D3D7Q5	134950	177529	145154	127214	217542	145258	181952	136761	40364	151987	98626.5	158113	224270	94259.8	135317	87364.8	99590	204923	194059	200268	170489	131278	131024	109478	131169	158717	152632	197093	106310	215268	109406	127318	173408	146160	143180	218244	107576	145361	139844	123042	153713	94908.9	49345.6	45107.8	125822	94267.9	145701	130405	259969
A0A0D3AM71	Filtered	Filtered	Filtered	Filtered	Filtered	Filtered	Filtered	Filtered	Filtered	Filtered	Filtered	Filtered	Filtered	Filtered	Filtered	Filtered	Filtered	Filtered	Filtered	Filtered	Filtered	Filtered	Filtered	Filtered	Filtered	Filtered	Filtered	Filtered	Filtered	Filtered	Filtered	Filtered	3730.09	7259.06	13390.3	5579.02	9580.83	25472.7	5947.35	20892.2	Filtered	Filtered	Filtered	Filtered	Filtered	Filtered	Filtered	Filtered	20438.8
A0A0D3AM96	103221	29556.6	Filtered	12644.3	Filtered	Filtered	44463.2	36904.1	100909	43982.3	42967.5	31551.2	49260.7	70375.3	38903.8	37774.8	25389	37487.8	30464.4	25351.8	39292.2	15359.3	29197.8	39453.3	16913.3	35762.3	18191.5	47141	39291.3	93332.2	46531.2	34715.8	37622.9	72608.9	63775.4	51461.2	44739.5	70844.2	52724	42014.7	62241.9	53923.9	76404.3	65811.1	89269.4	85070.2	83631.9	78194.1	46741.9
A0A0D3AMF4	62199.3	34603.6	27777.4	1	1295.49	77717	26190.7	62152.9	228024	38285.4	37621.9	35116.8	13681.7	23682.8	35278.8	47971.4	14833	27626.1	22475.7	24407.9	37641	34801	31109.4	37752.3	15252.5	24667.9	21911.8	33257	32597.4	41964.4	26441.4	30524.7	138007	56213	48740.9	41760.9	51147.3	51365.3	66717.2	37532.5	31931.5	58375.6	25880.2	44111.8	71585.9	53262.8	62986.7	45682.5	67262.2
A0A0D3AMM2	Filtered	93141	196223	Filtered	130778	Filtered	134090	116078	285775	98503.4	66364.4	119583	176146	153084	65665.8	77276.6	61299	24628.4	78514.7	132628	101761	38668.5	31182.1	25193.9	37743	85462.6	16733.2	33094.2	38037	18931.8	50551.6	Filtered	71169.3	50099.5	54707.7	84589.6	59857.2	46101	43856.9	63251.9	213429	165452	96174.3	110785	49530.4	137631	84149.9	106482	125043
A0A0D3AMR5	184885	97561.9	89556.1	88453.6	146036	149205	100727	135756	475323	55921.9	120902	66957.1	103938	127695	72599.1	88981.5	70723.8	69936.4	61253.2	122409	123423	45638.2	54702.5	75164.7	37997.5	67014.5	22655.5	51664.9	32289.3	45996.6	67400.8	85478.1	120919	15269.8	63010.1	58625.3	136445	79248.3	94484.8	68830.2	110388	137904	74710.7	132371	212784	115644	169750	178786	74726.9
A0A0D3AMT6	563516	205704	336314	308593	422134	416923	286928	298534	295053	294547	548853	370135	326172	302874	283506	336849	466570	246672	377121	447245	390173	351617	445988	466867	544577	387690	444193	381701	424225	418296	268481	345048	97739.4	239054	211146	147368	208330	167590	127617	208616	162297	132411	170516	177678	176747	40434.4	132645	136681	145401
A0A0D3AMW6	202205	140612	88997.3	185416	105924	119545	229647	259540	46685.2	55544.7	110552	61847.4	82171.1	92258.2	76623.5	82824.3	85105.6	79076.8	62978.3	81578.7	63990.6	83947.4	87120.2	89706.4	88437.6	57520.8	88878.8	86579.6	66567.7	70681.9	70225.3	101062	50374.2	90923.8	88184.4	58810.7	90123	80269	119871	103664	141302	114027	119525	144620	150782	165522	159912	249052	79481.3
A0A0D3AMY0	1.40384	6155.47	Filtered	Filtered	1	36929.3	Filtered	1	47681.6	32778.6	15172.8	63896	26456.3	20106.7	43483	39904	20060.8	13758	19317.2	38159.4	31721.4	19836.8	16509.5	1	24652.4	1	Filtered	31611.6	Filtered	22125.9	1	Filtered	8297.95	16515.2	23081.3	34559.9	61778.2	15795.7	11407.1	5081.25	Filtered	Filtered	Filtered	Filtered	1	Filtered	1957.98	Filtered	Filtered
A0A0D3AN05	167691	72934.7	145765	52711	226228	69505.7	Filtered	57134.1	Filtered	Filtered	Filtered	1	Filtered	Filtered	Filtered	1	Filtered	Filtered	Filtered	Filtered	Filtered	Filtered	Filtered	1	Filtered	Filtered	Filtered	1	Filtered	Filtered	Filtered	Filtered	Filtered	Filtered	Filtered	Filtered	Filtered	Filtered	Filtered	Filtered	19961.2	29767.8	Filtered	Filtered	Filtered	Filtered	20675	Filtered	Filtered
A0A0D3AN62	2.56911e+06	1.44118e+06	1.62806e+06	2.48771e+06	2.59709e+06	3.90736e+06	1.427e+06	2.24484e+06	1.47979e+06	978556	1.9102e+06	1.06499e+06	1.2109e+06	1.58857e+06	1.17175e+06	1.73675e+06	1.40673e+06	1.27243e+06	1.19175e+06	1.14051e+06	1.2699e+06	1.47389e+06	1.47002e+06	1.58643e+06	2.08312e+06	1.41251e+06	2.05291e+06	1.91355e+06	1.65399e+06	1818804	1.69276e+06	2.14194e+06	1132827	1.75459e+06	1.40051e+06	1.17976e+06	1.9427e+06	1787800	1.65902e+06	2.04468e+06	2.47754e+06	1.75443e+06	2.49044e+06	2472844	2437408	2.63833e+06	2.69654e+06	2936480	1.65864e+06
A0A0D3ANA7;A0A0D3CYA3	129413	71296.1	67966.8	72517.7	68952.4	110142	54199.4	1732.33	36010.6	38794.1	41756.5	39338.8	34477.6	Filtered	50905.8	16501.3	74882.3	72585.9	125419	117391	82747.5	67693.1	73909.8	71859.5	46466.6	67794.6	65863	41786.9	53339.5	93559.2	36261.3	47604.8	12080.4	29611.4	37575.4	57943.9	4775.18	39452.8	7828.37	58288	76346.2	60380.6	16079.5	8751.68	19632.1	37841.3	6229.94	245174	71739.9
A0A0D3ANA8;A0A0D3CYA7	Filtered	Filtered	Filtered	Filtered	Filtered	88182.9	18209.9	Filtered	44827.1	36721.7	10470.6	19105.8	17458.5	18109.3	12728.6	12902.7	Filtered	11482.3	15149.6	11516	1670.59	8467.42	13341.4	6183.98	28606	34676.7	35405.2	52882.1	35467.7	39049.5	46846.4	31427	13406.7	Filtered	5835.42	12300.3	10770.4	7989.44	8278.67	6754.89	Filtered	26154.3	15917.8	Filtered	31869.1	42628	23421.6	Filtered	6769.45
A0A0D3ANB9;A0A0D3EF05	Filtered	Filtered	Filtered	Filtered	Filtered	Filtered	1	Filtered	Filtered	28796.8	11930.4	6275.26	17041.2	Filtered	67819.4	2730.31	1	7160.57	24420.6	39917.8	57933.3	Filtered	1	11541.7	16325.3	28838.2	21076.5	Filtered	13654.6	5386.35	1	Filtered	7202.37	Filtered	1	102915	17259.7	Filtered	5072.27	Filtered	Filtered	24741.9	Filtered	Filtered	Filtered	Filtered	Filtered	Filtered	58692.6
A0A0D3ANH6	Filtered	Filtered	Filtered	Filtered	Filtered	Filtered	Filtered	Filtered	29513.8	24366.9	29669	9327.88	14535.7	Filtered	Filtered	19101.8	25847.3	17272.4	19666.7	27020.6	15344.3	22967.1	15621.7	29990.8	21777	20157.8	Filtered	12901	8547.94	4690.64	10890.5	11231.8	25606.3	30937.2	25361.5	19211.3	25142.5	27545.7	28528.2	20784.5	Filtered	Filtered	Filtered	Filtered	Filtered	Filtered	Filtered	Filtered	29837.7
A0A0D3ANI5	1	Filtered	478558	Filtered	Filtered	4.11585e+06	1	Filtered	20786.2	5703.19	Filtered	Filtered	Filtered	Filtered	Filtered	Filtered	Filtered	Filtered	Filtered	Filtered	Filtered	Filtered	Filtered	Filtered	Filtered	12572.2	Filtered	Filtered	Filtered	Filtered	43331.2	Filtered	38320.7	400.105	Filtered	Filtered	Filtered	Filtered	Filtered	Filtered	Filtered	Filtered	Filtered	Filtered	Filtered	Filtered	1	Filtered	Filtered
A0A0D3ANN2;A0A0D3CY38;A0A0D3CYM9	125620	50097.2	141619	136007	160954	160529	151398	95219.5	241134	370239	160946	85736.8	44110.5	70838.3	299721	254491	29630.1	41416.8	476929	616753	506118	37396.3	190291	258460	18247.3	397867	11608.2	447584	153638	73691.8	118571	253773	306640	16361	136964	372671	127925	135303	127920	155213	60076.7	271938	147830	69035.8	38932.1	93068.5	118135	150911	264707
A0A0D3ANQ0	Filtered	5927.74	4769.5	7998.38	7291.46	Filtered	Filtered	Filtered	Filtered	Filtered	1728.36	Filtered	Filtered	8284.42	Filtered	5772.8	10026.3	5084.13	4286.58	6430.82	8704.02	11098.1	9168.98	11684.6	4770.43	3614.17	Filtered	Filtered	2601.57	3601.7	Filtered	Filtered	Filtered	574.24	Filtered	4791.11	7937.24	4185.68	4518.34	Filtered	9640.16	10518	11278.7	9184.22	18265.3	12702.2	16288.6	28557.4	6806.97
A0A0D3ANX8	Filtered	Filtered	Filtered	Filtered	Filtered	Filtered	Filtered	Filtered	Filtered	Filtered	363.268	7226.25	Filtered	10445.4	6093	10732.3	9210.37	6664.17	Filtered	10546.7	2309.56	Filtered	Filtered	Filtered	7004.9	4589.71	Filtered	Filtered	Filtered	Filtered	5190.7	Filtered	7205.93	5642.67	661.52	4421.24	Filtered	10415.3	4875.51	Filtered	1654.14	1	Filtered	Filtered	Filtered	Filtered	Filtered	Filtered	6733.89
A0A0D3AP13	Filtered	Filtered	1	Filtered	Filtered	Filtered	Filtered	Filtered	15128.4	5559.43	5699.35	8532.11	10608.8	Filtered	1	3581.65	5543.35	1	Filtered	1	Filtered	4930.99	Filtered	5134.23	Filtered	Filtered	Filtered	Filtered	1642.51	Filtered	1	Filtered	Filtered	Filtered	Filtered	Filtered	4888.66	Filtered	1375.46	Filtered	Filtered	Filtered	Filtered	8282.78	Filtered	Filtered	Filtered	Filtered	5773.69
A0A0D3AP20	39956.6	40636.5	25563.8	70720.2	33606.6	20770.8	21749.6	17031.3	120940	60707.7	61281.5	55713.4	66073.3	60328.4	60795.1	57034.5	35113.9	45021.4	37756.4	45380.2	29804.7	36024	31279.2	43826.3	47787.8	43268.4	56316.6	38657.2	46780.8	44491.7	43780.1	3806.16	48154.5	43955.6	54029.9	71547.5	45575.8	63734	63809.1	31039.2	64717.8	35394	63359.7	82704	47683.2	28721.8	45433.3	200792	64022.4
A0A0D3APA8	518830	213914	163538	435978	297677	252146	Filtered	498191	Filtered	115119	255573	126222	204025	255883	113441	267369	213383	154470	103882	152508	142710	216400	202551	236240	223653	145882	257856	188199	181610	181410	149620	198485	66130.4	282248	253229	121335	216941	279716	322998	289781	202549	141363	361959	330406	447903	384675	432155	562195	227422
A0A0D3APC0	Filtered	35194.5	34113.1	18726.7	Filtered	Filtered	18071.6	Filtered	100195	42182.6	44304.8	40234.7	42060.8	41405.9	41327.6	59340.5	54912.1	36380.5	40229.6	40556.3	50439.1	58333.6	54509.8	63882.3	Filtered	33764.3	50867.6	37460.7	35205.8	41973.8	29631.1	47912.3	49961.9	52785.4	53397.3	59401	71515.9	47566.6	48479.5	41847	38950.5	22147.3	22283.8	21522	17915.5	32541.6	Filtered	34245.5	69379.2
A0A0D3APE5	113968	224245	100624	3980.09	271372	305745	193065	258195	124056	194372	127582	130620	153789	110707	137020	124297	127965	114929	168342	192796	163000	141792	99023.2	128615	188139	218076	105797	246997	78953	194537	149799	238105	79629.3	101335	72819.7	155863	152306	136423	109836	90012.9	216608	264988	154079	84498.6	177016	206370	109887	466554	133435
A0A0D3APP2;A0A0D3CXF9;A0A0D3CZM2;A0A0D3D751;A0A0D3DR11	1.33936e+06	572091	629765	852824	599071	524727	923863	444452	535721	544406	383658	638134	502493	659717	456658	244715	459340	635123	755856	779868	789210	549472	500994	479396	370436	527146	422915	523655	364650	1256582	412652	971269	279932	292945	596591	511935	769860	400867	280480	748040	826741	598210	224035	330959	462244	628755	464889	945094	560608
A0A0D3APR4	Filtered	1	Filtered	Filtered	Filtered	Filtered	14866.7	Filtered	975626	81203.8	268255	208663	294482	437620	258981	512287	141268	379730	248128	65781.3	433652	566319	279352	290029	430679	605461	435890	312713	481836	684801	449939	749283	728393	552950	731068	792511	1.27879e+06	718517	821517	1.59575e+06	1	21916.7	Filtered	1	Filtered	Filtered	Filtered	Filtered	152155
A0A0D3AQ01	382546	178095	548304	213343	583105	579202	299274	142574	434033	210984	340780	402941	353725	377499	492726	395258	416282	568616	642824	628164	612242	551707	552147	492747	448102	631629	445730	390959	293450	727751	334423	424811	607423	173807	461381	371469	425499	294661	315863	467033	150765	141907	58869.7	109887	132307	51093.2	119784	202424	264617
A0A0D3AQ02	Filtered	Filtered	Filtered	Filtered	Filtered	Filtered	Filtered	Filtered	15014.4	1689.67	2519.74	Filtered	Filtered	1365.22	2651.22	942.485	Filtered	1260.01	Filtered	978.006	2559.59	710.93	3300.8	263.414	441.659	306.643	2801.14	Filtered	Filtered	2500.19	Filtered	3971.5	4950.05	1022.19	1398.94	175.371	1751.48	2486.22	189.605	5079.98	Filtered	Filtered	Filtered	Filtered	Filtered	Filtered	Filtered	Filtered	Filtered
A0A0D3AQ57	85856.6	50970.9	21080.7	19734.5	23680.9	Filtered	8315.9	23020.1	20990.2	32032.9	5619.82	15804.7	19940.8	21048.2	6004.05	24321.8	35747.1	20139.1	15933.5	16957.7	21767.6	52927.4	21711.5	34290.3	25373.5	16338.3	28146.6	23042.8	29222.1	27277.1	21880.8	9652.47	10110.3	35008.6	30319	30879.9	31207.8	32305	26554.1	21601.7	27340.2	13463.5	22153.5	Filtered	18444.8	16154.8	20499.2	52229.1	21406.6
A0A0D3AQ87;A0A0D3CWZ7;A0A0D3D097	717681	647587	350324	506324	574176	108991	692938	743898	169656	358830	195070	415198	251885	290166	197749	221323	316488	208756	203312	252714	192109	403630	390628	378326	411483	469341	468511	286056	275112	215386	308232	779997	213080	419320	388975	366565	413442	373694	213386	442547	564421	837254	680019	754587	843218	745192	894789	1.31457e+06	354645
A0A0D3AQ98	Filtered	Filtered	Filtered	Filtered	Filtered	Filtered	Filtered	Filtered	Filtered	Filtered	Filtered	Filtered	Filtered	Filtered	Filtered	Filtered	156780	97567.8	117810	151922	75678.5	83013.8	102501	138969	38072.9	110808	91291.8	Filtered	123597	Filtered	Filtered	94818.9	Filtered	Filtered	Filtered	Filtered	Filtered	Filtered	Filtered	Filtered	Filtered	Filtered	Filtered	Filtered	Filtered	Filtered	Filtered	Filtered	106005
A0A0D3AQA9	360902	124754	124318	232385	219979	89237.4	77485.8	123272	263390	80831.5	365927	197742	75476.1	315908	154274	193536	114324	37533.1	92951.6	117636	52341.7	73425.3	72655.2	227440	304173	60503	142333	113263	141355	48033.8	122028	120077	128403	173177	121428	103610	164254	207286	152656	189460	102915	35501.8	57060.7	81843.6	107909	75504.4	96324.6	153500	64747
A0A0D3AQF2	517853	301585	604452	408751	758535	534348	516014	294968	146493	305005	175255	344500	315224	197280	318706	239582	199016	450581	457488	437012	515295	261374	275451	250790	255082	380589	235202	436321	225301	526407	179374	225041	480325	191095	332333	407524	248461	295805	207151	275971	555976	426825	265017	261235	298039	190434	289410	371919	303397
A0A0D3AQF3	88150.9	36543.8	64226	94252.9	94948.8	123107	138933	78048.3	31943	16207.7	43682.8	16782.2	29196.8	48753.3	66338.8	50469.3	64588	50308	86212.1	71546.5	74223.1	83809.7	55390.3	88410.9	43776.1	70992	42341.1	27378.9	20993.9	66029.4	24256.6	58153.9	66349	43861.6	45310.5	67083.6	96693.3	85694.7	57830.9	43990	68232	25640.3	50428.4	56112.4	50253.5	59733.2	64541	50148.7	30005.4
A0A0D3AQG8;A0A0D3D0L2	864570	1.16856e+06	598564	1.44718e+06	875817	1.62493e+06	488134	1.28862e+06	126130	390175	741781	396027	364329	440233	306013	801496	467445	287457	169265	219662	176469	519969	418130	511336	484170	411434	655949	712359	671386	279316	712792	737157	200843	322363	504533	183218	570323	379394	308175	410341	281882	224006	604401	751866	533260	622835	496179	706471	158914
A0A0D3AQH2;A0A0D3CWP7	Filtered	549.081	Filtered	Filtered	Filtered	Filtered	Filtered	Filtered	6648.98	16594.2	Filtered	Filtered	Filtered	Filtered	Filtered	Filtered	Filtered	Filtered	Filtered	Filtered	Filtered	Filtered	Filtered	Filtered	Filtered	Filtered	Filtered	Filtered	Filtered	Filtered	11228.1	Filtered	Filtered	Filtered	Filtered	Filtered	Filtered	Filtered	Filtered	Filtered	Filtered	Filtered	Filtered	Filtered	Filtered	Filtered	Filtered	Filtered	Filtered
A0A0D3AQH8;A0A0D3D0N3	Filtered	Filtered	Filtered	Filtered	Filtered	181285	Filtered	Filtered	Filtered	102348	Filtered	Filtered	Filtered	Filtered	2681.49	Filtered	1	1	10646.9	71715.3	7615.29	27181.3	Filtered	Filtered	Filtered	Filtered	Filtered	Filtered	Filtered	7538.54	82614.5	Filtered	16108.7	Filtered	Filtered	7384.61	Filtered	Filtered	Filtered	Filtered	Filtered	26194.4	13498	Filtered	Filtered	Filtered	Filtered	Filtered	38016.4
A0A0D3AQT8	811156	134315	338900	466187	411188	398333	157157	433462	21306.1	Filtered	10766.4	11184.2	18910.3	35055.5	14967.5	4140.05	55220.5	67105.5	36005.2	35123.5	27180.4	37830.2	62196.9	25222.5	29129.5	13415.8	28575.1	29338.8	33781.1	14443	34707.6	49360	Filtered	11262.9	13067.7	Filtered	2791.3	10360.6	16705.1	15717.5	593172	132653	113863	78058.7	870713	731011	727289	1099590	41592.6
A0A0D3AQU3	Filtered	Filtered	Filtered	Filtered	Filtered	Filtered	Filtered	Filtered	36519.9	Filtered	6701.23	10378.5	4565.36	11569.8	16784.3	1	1493.1	1809.6	5076.22	6204.58	5639.64	8229.97	10788.8	2691.18	1	1	Filtered	1	Filtered	4111.75	1684.08	3812.91	14727.1	11356.7	12934.7	7025.34	4893.88	2326.39	9535.73	12232.9	2016.15	Filtered	Filtered	Filtered	6302.36	Filtered	Filtered	Filtered	6476.94
A0A0D3AQW4;A0A0D3CWE8;A0A0D3D0Z6	1.32904e+06	99619.1	708526	813993	931484	123765	810099	1.22434e+06	372575	40892.1	195490	61543.8	Filtered	68683.3	56458.2	Filtered	Filtered	116272	87861.5	78463.7	44736.5	103529	120924	204750	Filtered	47322.8	80240.1	72507.5	24255.2	50905.3	35747.2	50807.1	87605.4	212791	172241	253841	193090	362207	154588	324685	931666	932022	1.23785e+06	1.48716e+06	1.22641e+06	1.4054e+06	973043	1.45745e+06	1.32105e+06
A0A0D3AQX7	291584	176178	170771	250438	342664	147967	129856	154537	99515.1	142231	152583	153976	224209	96427.9	192374	103906	121268	184903	129256	201346	193656	130275	134664	105317	117354	147711	165278	125115	75092.4	247403	63989.4	175737	85438.1	129791	141371	126056	139754	112423	122120	128692	140689	113079	131878	91389	206035	113707	209465	228440	114456
A0A0D3AR39	366409	473744	481839	401997	383406	201872	528990	338767	113906	246607	277404	245107	347356	175470	229299	231061	140062	241767	246912	333617	207820	127639	169460	175055	183166	173092	244686	281484	146708	218731	178435	274539	261450	271540	260061	321495	288694	311019	261778	256705	377984	293501	308346	65035.8	328679	277651	208511	371003	405503
A0A0D3AR46	138476	106428	66333.9	125188	Filtered	Filtered	91952.1	104203	Filtered	45714.1	44151.1	11673	44192.9	29326.8	16757.4	24636	26607.4	54849.3	Filtered	46376.4	42259.2	48223.2	42242.2	Filtered	68383.9	66589.3	82680.1	Filtered	29982.3	71180	22238.9	Filtered	4334.5	Filtered	26514.3	21404.8	29313.6	40879.9	22229	Filtered	91540.1	75752.6	119040	55718.1	91028.2	93128.6	106694	86760	14832.1
A0A0D3AR88;A0A0D3C3W5	Filtered	Filtered	1	Filtered	Filtered	Filtered	Filtered	Filtered	27833.2	6854.59	19654	8874.4	8180.37	11854.1	4197.65	9907.27	3482.33	4213.28	769.105	2178.65	227.083	8556.73	7093.09	7990.83	11132.4	6416.23	13824.5	516.997	10022.1	329.933	3343.29	7715.95	392.04	10174	1867.09	6931.25	11623.5	12755.8	1039.39	756.38	Filtered	Filtered	Filtered	Filtered	Filtered	Filtered	Filtered	Filtered	Filtered
A0A0D3ARA5	101406	98863.8	59030.6	73017.5	85132.5	93890.3	82361.1	81870.8	83217.8	28692.1	63484.2	49395	62247.6	55151	32921.4	24739.6	23900.2	34135.5	32560.3	28702.6	20606.8	33767.3	36284.3	31155.6	46536.9	28461.5	36201.8	15793.1	33043.1	34062.3	54106.2	29619.1	2427.1	3360.91	4467.21	Filtered	14099.3	Filtered	2943.24	Filtered	109542	61896	69138.8	98996.8	129689	68533.9	84224.9	118618	Filtered
A0A0D3ARE8	565614	498709	316392	398979	395148	428918	283100	475371	856862	509077	1.04314e+06	662336	675097	1.19245e+06	612674	462477	505404	536558	466514	422281	346224	643653	545202	598868	950944	577479	775383	607489	885974	574562	861751	792443	501306	775752	607622	476798	699666	827539	750961	746816	379396	284119	337108	440658	509183	362790	430665	676009	556758
A0A0D3ARH8;A0A0D3D1M2	73290.7	34988.1	170736	131157	151147	Filtered	54890.5	12472.8	82093	106780	32705.8	140122	114385	52964.6	62332.5	46484.2	117202	127661	146718	138621	204943	56945.5	85123.9	60760.4	56769.9	55415.5	57708.7	156627	95616.7	158314	38505.4	116875	97932.8	44082.9	47991.3	86350.8	47566.9	19505.8	31428.2	65527.3	65286.7	44236.7	77243.5	16417.6	30469.8	Filtered	129718	28158.4	55437.7
A0A0D3ARK5;A0A0D3CVY0	28982.8	21899.4	56716.1	Filtered	378898	223134	128046	59913.1	171294	133859	Filtered	140768	128171	Filtered	101457	30124.4	79564.4	75558	70355.3	219536	145001	67645.4	82397.6	35217.6	153523	179763	116033	62399.5	33392	65300.4	97007.3	81473.9	143289	Filtered	Filtered	131904	26021	Filtered	37331.5	4140.44	40522.2	69470.7	32341.9	7682.86	21644.2	76451.2	Filtered	Filtered	58815.3
A0A0D3ARN5;A0A0D3CAS2;A0A0D3CVU6;A0A0D3D1S6	58090.8	35817.1	122282	101073	Filtered	Filtered	69726.4	Filtered	160237	164746	94664	147112	217193	Filtered	157913	94613.6	143048	233626	230736	293427	249166	106445	128716	140314	64423.1	193397	171867	170192	55633.2	305066	18988.3	38138.9	78559.7	100460	81770.2	154424	180862	45806.5	67390.2	37426.6	132078	Filtered	106458	75307	Filtered	77443.6	Filtered	Filtered	201461
A0A0D3ARR0;A0A0D3CVS9;A0A0D3D1V1	529896	325000	298738	386148	358175	671536	257198	357845	353491	275747	172469	168773	74164.8	122029	127201	187221	86281.3	202106	245206	195390	162885	340642	271626	196374	231129	271298	214495	185240	76226	189211	242860	183398	134525	77935.3	247356	184065	119673	197716	163870	152653	182844	154436	198956	132932	120910	242611	232155	114486	259751
A0A0D3ARR8	328606	57181.2	80301.4	267754	177578	148874	99304.8	175066	36241.9	9265.8	71452.9	53648	38526.1	103847	46550.7	99352.1	89716.5	29154.7	35947.2	42142.3	59709.9	38480.8	59624.5	50522.2	122073	58241.3	77524.5	69394.1	17219.6	83805.4	78251	25861.5	5979.95	106210	70787.3	43841.2	27195.1	83748.4	96387.1	94636.8	157025	140277	192420	171304	217643	242639	410948	517691	48663.7
A0A0D3ARW7	93634.2	49554.1	38259.3	90716.2	79136.1	42464.9	147075	51194.7	190417	37542.6	71842.7	16608.4	27631.5	13235.6	28852.6	23908.5	37119.8	23332.6	22224.6	20877.4	25814.3	28571.6	23169.6	33012.5	31978.2	36563.4	43415.6	13487.8	12642.9	27680	57778.4	30239.9	52400.4	55133.3	60021.6	26001.9	28110.8	53702.6	36063.4	22782.9	19485.8	20614.4	53622.7	59948.6	51262.7	35008	49949.6	42369.6	27330
A0A0D3ARX2	Filtered	Filtered	Filtered	Filtered	Filtered	Filtered	Filtered	Filtered	Filtered	Filtered	Filtered	1805.97	Filtered	Filtered	4488.59	1152.85	2357.33	2473.2	Filtered	1471.59	Filtered	1536.64	Filtered	Filtered	Filtered	Filtered	Filtered	Filtered	Filtered	2086.45	Filtered	Filtered	Filtered	Filtered	2042.64	Filtered	Filtered	1	Filtered	2489.01	3206.41	Filtered	Filtered	Filtered	Filtered	Filtered	Filtered	Filtered	Filtered
A0A0D3ARZ3	34949.9	25779.4	5349.87	18686.9	24305.9	Filtered	Filtered	1.02864	68256.7	7816.09	26553.1	18201.7	15531.5	24183	21835.1	19642.7	13136.6	18439.9	12298.2	18598.4	17149.5	22531.2	24757.6	17931.9	30343.4	20602.1	29815.1	Filtered	30258.9	21654.2	23118.5	53764.3	24522.2	33232.5	38164.8	36702.2	36174.4	30837.9	38296.1	49277.4	9852.21	4714.78	Filtered	16100.4	Filtered	Filtered	Filtered	8441.54	38699.8
A0A0D3AS24	281524	213686	107842	150198	117822	433897	250868	250041	55372.3	26340.4	51052.3	93581.2	113508	400069	79973.7	112886	55038.2	40970.1	23133.5	20923.3	11642.4	105230	38587.6	11739.4	76814.3	68632.2	100141	213237	180873	78665.6	49683.8	155759	65973.1	21411.7	209150	3441.07	4462	39982.7	63910.3	313399	126710	211447	261740	197631	130358	105464	320046	268423	1
A0A0D3AS63;A0A0D3B934;A0A0D3DZR1	Filtered	Filtered	136044	Filtered	Filtered	Filtered	Filtered	Filtered	839507	228004	Filtered	Filtered	Filtered	Filtered	Filtered	Filtered	Filtered	18959.1	Filtered	24414.1	10250.2	Filtered	Filtered	10972.1	Filtered	Filtered	Filtered	Filtered	Filtered	Filtered	372692	Filtered	Filtered	Filtered	Filtered	Filtered	Filtered	Filtered	Filtered	Filtered	Filtered	Filtered	Filtered	Filtered	Filtered	Filtered	Filtered	Filtered	Filtered
A0A0D3ASC9;A0A0D3C8M9;A0A0D3E022	Filtered	51325	60787	127656	109314	Filtered	70833.8	96970.6	Filtered	59302	79599.6	42911.9	Filtered	44335.4	54065	71586.7	11093.1	19778.1	Filtered	13368.9	8765.19	37056.2	30654.7	14607.1	28282.8	16269.8	37983.4	22559.8	31058	31820.4	54054.9	Filtered	37854.1	40653.2	42606.3	42155.7	68274.7	83119.8	Filtered	93420.9	86816	55630.1	50158.3	76084.3	90885	60395.7	75497.3	66250.5	89023.8
A0A0D3ASD0	1	108735	87902.7	109095	124579	203095	225903	116903	252003	125080	136972	49463.4	84881.6	194836	69346.7	34680.2	67810.2	71454.6	72632.6	83786.3	65824.1	50083.2	34379.7	91305.4	44163.4	134016	80475.2	125253	115092	81675.4	101942	76326.1	149891	88119.1	72756.1	86791.6	119598	40586.6	85833.5	108407	85560.8	172768	33979.6	230001	75716.6	7858.34	28926	36812	94879.9
A0A0D3ASD1;A0A0D3B8T4	Filtered	Filtered	Filtered	Filtered	Filtered	Filtered	Filtered	Filtered	12406.6	5957.01	6367.45	4262.45	4580.58	Filtered	Filtered	3869.98	5832.75	6577.58	Filtered	Filtered	6430.64	9209.05	8045.95	6768.46	5337.93	5611.27	6127.25	Filtered	6946.9	2807.55	7586.56	6007.9	Filtered	9957.16	6763.58	8137.67	4060.86	14613	10269.6	11304.1	Filtered	Filtered	Filtered	Filtered	Filtered	Filtered	Filtered	Filtered	2990.24
A0A0D3ASK8	95002.1	137212	138113	139406	158433	80520.2	245017	70637.7	53772	100144	76394.6	42499.5	149801	14719.8	101860	40564.2	146978	196767	79782.1	151658	222794	77725.9	76181.8	151190	57711.2	118457	173830	96707.9	21664.9	170234	39092.4	63585	182711	207281	216824	191254	76344.1	132262	164197	51455.1	178885	186201	87244.9	84769.1	140799	218301	200892	196079	108909
A0A0D3ASN1	277280	151697	200472	200122	291660	275826	158257	153860	33981.4	202967	180167	228737	326667	178430	262834	195824	202058	266485	247681	313352	281771	192625	199940	224892	161914	180020	176741	230702	129349	284567	140345	172912	195910	170027	172410	257753	228419	198490	185692	166704	299278	226748	145797	134929	240943	100119	262487	255058	304232
A0A0D3ASN3;A0A0D3B8H2	12553.7	24742.4	138914	Filtered	Filtered	1382949	61059.8	Filtered	379328	227030	1	31954.8	52567.3	Filtered	3557.27	37421.8	41284	33823.4	50194.2	15620	40464.7	48385.5	92375.1	3334.4	40038	36070.3	45502.4	45092	38220.1	77347.7	207086	17575.8	26963.9	51520.6	13888	31797.8	78086.7	75518.9	1630.47	119784	38363.3	60172.5	140886	50521.8	11919.4	56218.3	35256.6	Filtered	25452
A0A0D3ASQ9	Filtered	Filtered	22094.2	Filtered	1	Filtered	Filtered	Filtered	Filtered	Filtered	Filtered	Filtered	Filtered	Filtered	Filtered	Filtered	Filtered	53240.3	1	1	1	1	1	1	109545	230409	96952	380639	205775	179747	51088	74976.4	Filtered	Filtered	Filtered	1	Filtered	1	Filtered	Filtered	108047	95603.4	154162	95779.9	183724	120667	178977	233640	1
A0A0D3ASS6	407236	243385	44195.2	204300	88339.2	1.9278	10152.9	243296	1	53482.9	58920.9	43174	114424	Filtered	83997.1	191957	131533	63984.2	37504.7	19667.9	1	111219	139902	129245	78060	25806.1	76604.5	43835.3	22642.5	86669.6	119877	108513	Filtered	134727	109603	51928.4	172464	Filtered	158225	161431	110831	165078	Filtered	30837.3	Filtered	37150.8	Filtered	139737	63117.1
A0A0D3ASU0	304096	329766	220130	195681	Filtered	Filtered	Filtered	297849	202553	164291	193919	122328	166682	288090	151164	177416	168775	191360	132175	157953	154550	189836	173207	245024	232342	178449	219802	183396	190046	153103	177613	226231	141636	316323	227281	204086	264342	302102	254351	356957	395292	147935	214396	603636	310778	297860	321175	362142	162498
A0A0D3ASZ2	Filtered	1	796.291	Filtered	Filtered	Filtered	1229.6	Filtered	Filtered	188.643	754.98	303.416	1787.67	Filtered	1574.34	392.275	426.215	1222.1	356.371	100.605	Filtered	281.339	374.673	88.8764	973.479	1644.66	190.899	945.961	1036.78	472.43	2518	1	2356.98	1066.66	2250.33	1910.04	286.034	1629.58	1869.3	1252.1	855.919	1793.98	1013.93	1424.39	Filtered	452.918	361.997	1186.84	2868.33
A0A0D3AT05	205383	102833	137321	125030	266449	318685	116726	136459	211712	90694.4	103612	93476.1	99690.1	145873	110964	70130.9	72579.7	74822	78981.6	104692	68479.1	89529.3	79696.5	91244.3	111267	95118.3	97071.3	139010	88368.8	125832	87634.1	141549	54805.8	54835.5	46889.9	47409.8	99330.9	83871.8	52991.5	52881.1	197134	206375	226720	245795	221197	284031	175488	293543	100255
A0A0D3AT16	1.64379e+06	1.239e+06	996054	1.43567e+06	1.57319e+06	1.09022e+06	1.08454e+06	1.14994e+06	344754	647648	1.00876e+06	740815	942637	829719	631959	770989	676692	608250	576344	718527	515493	626190	654021	774017	555846	540437	670570	625315	501929	637974	492617	518566	744089	917818	997264	758093	913165	1064671	1.04006e+06	1.0699e+06	1.22116e+06	818864	776396	905085	1.04788e+06	1.0347e+06	1.19576e+06	1358719	846916
A0A0D3AT59	18098.9	Filtered	10773.5	Filtered	Filtered	Filtered	16879.1	10153.4	Filtered	18728.6	29474.3	Filtered	22527.1	Filtered	25263.8	Filtered	21758.7	29323.2	24528.2	43944.8	19863.3	20139.6	Filtered	15265	10716.4	4337.56	9822.25	20047.2	Filtered	Filtered	11785.8	Filtered	21951.8	4686.51	17166.1	24334.4	20469.1	15780	24022.8	Filtered	14472.5	Filtered	4250.98	12285.1	Filtered	4294.31	Filtered	Filtered	10534
A0A0D3AT63;A0A0D3E8Y0	116674	128249	153768	60605.3	79919.7	345326	122528	43473.8	288085	245142	80591.8	162343	190204	76969.7	182521	128036	136329	148569	217916	267786	184628	105557	126420	124130	86657.3	147756	100857	71053.8	79729.7	139950	180311	79431.7	203826	93152.5	100840	248203	158337	136232	109881	79629.4	85540.5	141631	32005	49213.7	100748	66547.4	65292.4	Filtered	144524
A0A0D3ATL3;A0A0D3D9N2	134126	173001	225350	271813	253829	197511	234650	242615	428187	475688	315801	345891	301151	237147	325455	286922	296053	317951	388919	488016	465280	334064	376919	324276	192604	221149	247498	206360	157406	255866	340299	200592	216139	200429	206205	332981	302414	302651	189477	185169	234723	197274	240534	504898	399815	598311	452429	621909	412700
A0A0D3ATN4;A0A0D3BUR4	Filtered	133644	51359.3	Filtered	Filtered	Filtered	Filtered	Filtered	22324.7	21089.4	33119	96885.9	50060.8	232492	24689.8	96175.3	54762.1	25241.5	Filtered	19173.7	20071.1	78810.3	64396	12317.1	64549.5	6404.84	40980.6	119588	97118.6	128924	Filtered	40957.8	Filtered	10714.5	128268	Filtered	Filtered	Filtered	11282.3	80426.3	Filtered	Filtered	139617	Filtered	Filtered	116417	Filtered	Filtered	Filtered
A0A0D3ATR4	124950	85310.9	76791.8	45842.4	99026.2	87739.3	36377.9	117771	Filtered	Filtered	Filtered	Filtered	Filtered	Filtered	Filtered	Filtered	Filtered	Filtered	Filtered	Filtered	Filtered	Filtered	Filtered	Filtered	Filtered	Filtered	Filtered	Filtered	Filtered	Filtered	Filtered	Filtered	Filtered	Filtered	Filtered	Filtered	Filtered	Filtered	Filtered	Filtered	40354.9	36586.1	36285.1	53023.8	126029	67748.9	100897	188139	Filtered
A0A0D3ATW9	Filtered	1	Filtered	Filtered	Filtered	Filtered	Filtered	Filtered	Filtered	59926.3	86534.6	84038.3	87228.9	53383.6	88740.5	Filtered	51315.2	54016.7	82297.3	71656.6	59554.8	56006.6	57448.7	32337.8	45124.7	44266.1	Filtered	36676	49943.2	30324.3	52160.2	Filtered	68157.4	50987	69945.6	87817.5	54607	48105	67835.8	62372.2	Filtered	6170.81	Filtered	Filtered	Filtered	Filtered	Filtered	24772.5	Filtered
A0A0D3ATX6;A0A0D3D8U3	Filtered	2.57948e+06	1	Filtered	Filtered	Filtered	Filtered	Filtered	Filtered	Filtered	Filtered	Filtered	Filtered	Filtered	Filtered	Filtered	Filtered	Filtered	Filtered	Filtered	Filtered	Filtered	Filtered	Filtered	Filtered	Filtered	Filtered	Filtered	Filtered	Filtered	Filtered	Filtered	Filtered	Filtered	Filtered	Filtered	Filtered	Filtered	Filtered	Filtered	Filtered	Filtered	Filtered	Filtered	Filtered	Filtered	Filtered	Filtered	Filtered
A0A0D3ATY8;A0A0D3CF23;A0A0D3D5P1	Filtered	46694.3	Filtered	Filtered	Filtered	Filtered	Filtered	Filtered	Filtered	Filtered	8536.63	23993.4	Filtered	31895	Filtered	35964.6	13998.9	12054.2	14850.2	14052.2	Filtered	9778.52	Filtered	Filtered	Filtered	Filtered	Filtered	Filtered	14203.8	Filtered	Filtered	Filtered	14319.1	28665.7	36847	11615.4	37220.1	52546.6	47656.8	38868.4	Filtered	Filtered	20496.5	Filtered	Filtered	Filtered	Filtered	Filtered	Filtered
A0A0D3AUA0	68394.4	30880	59100	81626.7	38055.2	Filtered	55998.7	59355.6	91161.2	48568.9	Filtered	42720.6	36529.4	25183.7	97541.9	64501.4	49550.3	62809	59832.5	33308.2	83236.4	81621	62274.9	53042.6	56754.7	69787.3	47441.2	52792.5	40865.6	87326.5	46990.6	146788	20600.2	53159.3	Filtered	36229.3	46805.7	29731.8	36011	41783.6	49231	115826	50083.9	85664.2	67979.6	98538.7	47532.1	Filtered	34889.8
A0A0D3AUD9;A0A0D3D9C0;A0A0D3DEX5;A0A0D3DU80	72896.3	69121.1	116175	53287.6	43247.7	378819	63877.2	46236.1	366123	265642	59404.9	109616	110997	68450.5	113887	88512.1	57185.3	83167.9	144234	127915	140517	71991.8	67374	73463.8	51792.8	61385.7	49956.8	58839.3	46396.3	111982	209604	44857.9	48665.9	36703.4	28762.5	111599	54951.4	71567.5	33783.3	36576.9	105362	78348	69607.7	105558	35383.7	53907.2	67517.1	68161.8	113767
A0A0D3AUT9	340445	265704	265538	269676	341200	280256	355347	173430	933257	153938	296129	244742	171249	228309	113814	Filtered	194423	109014	175533	188620	133871	174036	132194	246161	245152	169781	219363	82113.3	218724	101395	137518	188640	133385	209673	163413	208524	349512	247298	214546	131315	331849	352821	356602	774581	457583	562301	247262	374126	237491
A0A0D3AUX5	3548531	3.11292e+06	1.73977e+06	2.73609e+06	2.70881e+06	2.93902e+06	1.92759e+06	3435542	2279547	2.26398e+06	3.77934e+06	2.2854e+06	2.73669e+06	3.43323e+06	2.17396e+06	2723214	2554380	2.43379e+06	1.79256e+06	2110948	1.84506e+06	2662185	2567102	2.70047e+06	3916707	2.49683e+06	3.28202e+06	2713687	2.78058e+06	2.35142e+06	3.10304e+06	3.35287e+06	2.12038e+06	4092220	3.00419e+06	2.48129e+06	3408352	3956606	3.32632e+06	4.15755e+06	2400201	1.68267e+06	2.11484e+06	2.53384e+06	2.85618e+06	2.36462e+06	2.95125e+06	3.63364e+06	2.34146e+06
A0A0D3AUY9;A0A0D3D9V6	Filtered	77795.6	Filtered	20069	Filtered	Filtered	Filtered	Filtered	50008.3	84724.8	55277.6	58727.8	50320.7	76341.4	21277.2	57743.8	45676.9	27311.1	42534.4	30303.3	37099.8	29951	15546.6	41033.4	56817.7	5001.9	Filtered	17512.2	67597.3	Filtered	52198.6	Filtered	34056.6	53733	44730.8	65899	55820	35645.2	52457.4	Filtered	Filtered	Filtered	Filtered	50036.2	Filtered	15116.4	Filtered	Filtered	41634.1
A0A0D3AV07	163612	152765	1	136186	148705	Filtered	Filtered	Filtered	1	59758.9	1	37387.9	67487.9	1	67268.9	1	33577.7	90901.9	45274.8	53286.6	54713	1	40377.2	39052.2	1	68264	93934.6	Filtered	1	109624	1	55731.6	1	Filtered	1	161316	1	71361	103852	55085.8	192000	114840	125829	Filtered	207347	202386	295182	269987	146574
A0A0D3AV19	Filtered	Filtered	2855.97	Filtered	Filtered	Filtered	Filtered	Filtered	Filtered	43181.7	57932.5	50502	21794.9	55210.7	17396.9	58009.6	37835.3	30669.1	Filtered	15046	Filtered	44096.9	31611.3	22125.8	40282.9	21668.4	29247.2	11345.6	39424.5	22192.5	41662.4	42167.5	877.532	Filtered	Filtered	6448.64	11381	9417.76	21252.2	4295.31	26295.1	Filtered	Filtered	Filtered	17846.1	15847.9	8048.85	Filtered	11415.8
A0A0D3AV28	114015	15840.8	43086.3	40753.2	Filtered	256717	31676.4	59632.5	10079.6	1503.91	Filtered	Filtered	Filtered	57014.5	Filtered	Filtered	Filtered	Filtered	1	1	1	1	Filtered	7392.19	Filtered	Filtered	Filtered	Filtered	Filtered	Filtered	5222.81	1	3449.53	3952.88	Filtered	2728.17	2739.56	7247.98	3782.21	Filtered	11570.3	Filtered	Filtered	Filtered	Filtered	Filtered	Filtered	Filtered	3057.37
A0A0D3AVE1	6086.2	Filtered	1	Filtered	Filtered	5910.62	Filtered	Filtered	1078.17	Filtered	Filtered	Filtered	Filtered	8009.92	Filtered	Filtered	Filtered	Filtered	Filtered	Filtered	Filtered	Filtered	Filtered	Filtered	Filtered	Filtered	Filtered	Filtered	Filtered	Filtered	Filtered	Filtered	Filtered	Filtered	Filtered	218.644	Filtered	Filtered	Filtered	Filtered	17610.6	Filtered	Filtered	Filtered	7789.48	Filtered	2583.78	Filtered	Filtered
A0A0D3AVE4	305057	225985	186507	202949	362497	367394	232175	306102	733459	1.06751e+06	1.10701e+06	971862	1.27728e+06	811032	1.2213e+06	1.24596e+06	612532	780088	407123	773461	892676	579011	666907	729762	996534	845495	791079	1.01537e+06	932684	999875	632074	1.12662e+06	593789	892517	695129	494144	686632	936446	773418	1.16978e+06	313443	350496	303453	373192	355201	333902	464138	435904	692367
A0A0D3AVF1	238276	302697	80731.4	130904	109906	93875.5	296516	374768	178484	278146	408883	212710	321011	320861	234811	244020	223365	204000	183576	243468	198054	246368	228826	274488	281930	194760	171791	257715	234677	129812	221224	264573	167698	347408	253456	247779	299069	342494	304937	282635	291286	188079	286711	363651	364033	368940	396738	424929	223841
A0A0D3AVP7	6170768	3.22568e+06	2.54142e+06	4449323	4191424	5.08557e+06	2.58056e+06	4.97795e+06	2.7451e+06	2.62515e+06	3.67824e+06	2.48519e+06	3.20438e+06	3972137	2.33642e+06	2.99502e+06	2.53314e+06	2298430	2.06893e+06	2.36622e+06	2.32862e+06	2.70628e+06	2.27458e+06	2.61315e+06	3.65549e+06	2.23215e+06	3.2055e+06	3.21272e+06	3471401	2.66676e+06	3.02781e+06	3.23952e+06	2635440	4.03431e+06	4288295	2551589	4.45563e+06	3.73202e+06	3.73854e+06	4.68884e+06	4396353	3177612	3.95046e+06	4.18144e+06	5373267	7430572	7.06811e+06	7.33907e+06	2935400
A0A0D3AVQ7	Filtered	15547.3	1726.53	Filtered	Filtered	Filtered	Filtered	7537.73	521171	9014.23	42075.3	488.351	19718.7	24703.3	45428.2	Filtered	9016.98	Filtered	Filtered	674.278	10053.2	5908.06	21182.3	9307.88	Filtered	9680.21	18658.6	Filtered	11582.4	Filtered	Filtered	Filtered	1	846.33	21937	16558	1	Filtered	45250.5	Filtered	Filtered	7038.31	6154.16	24178	15306.3	12663.8	15806.7	1.02897	27889.1
A0A0D3AW45	352988	23107.1	230.483	169413	207028	Filtered	Filtered	29106.9	22383.6	26751.6	66474.4	28324.4	46164	34136.4	13313.1	31174.2	52794.4	47425.1	17708.3	39300.9	33802.3	56244.5	76556.6	36531	62346.6	33239	47714	25489.2	39974.2	23096	41004.4	151996	18296.6	145946	33520.7	3544.1	34050.4	84763.8	99758.2	214901	11150.4	11277	70929.9	31638.1	37479.1	329927	93707.3	234339	6299.54
A0A0D3AW77;A0A0D3DBA2	Filtered	Filtered	Filtered	Filtered	77748	48298.9	96156.2	13660.1	83361.3	95812.8	78313.6	110915	79658.8	45859.5	60802.6	74035.6	54861.7	65632.8	181035	164425	159782	82965.1	53113.6	118182	83711.1	65846.7	136557	95662.8	108888	69724.8	36836.2	60038.4	73074.2	58412	73012.5	149010	164600	14811.6	10995	35250	179854	160443	Filtered	Filtered	Filtered	109227	131524	137588	118490
A0A0D3AW97;A0A0D3BDG0;A0A0D3DBD3;A0A0D3E0I0	302667	130871	386634	67114.9	Filtered	1.61551e+06	Filtered	271854	420273	459176	71468.3	91386.4	138531	Filtered	137644	156503	80745.4	129102	90987.3	134944	155112	118069	111687	101086	82474.4	29018	127614	107111	113872	357894	628107	117009	74936.3	137346	81362	85891.1	96655.5	36993	87839.1	137803	57513.9	186346	148540	179868	119141	261030	69589	72610.6	39094
A0A0D3AW98	Filtered	Filtered	Filtered	Filtered	Filtered	Filtered	Filtered	Filtered	49770.6	21488.1	32562.1	24055.6	26777.2	32869.5	17550.8	24892.9	Filtered	Filtered	22233.4	25447	26525.5	27522.3	24002.3	25169	28316.9	Filtered	26920.1	29885.7	24656.6	22475.7	Filtered	Filtered	30914.4	30108.9	29144.2	20184.9	29801.9	30321.5	29497.7	32975.4	Filtered	Filtered	Filtered	Filtered	Filtered	Filtered	Filtered	Filtered	Filtered
A0A0D3AWA9	27263152	19987018	14572676	22287448	22235408	17208222	17379026	25602994	10982718	6911592	11016759	7354974	9305051	13435884	9304573	8199183	11190004	8.09361e+06	8734668	9964762	6372402	10023098	7925600	11025933	9113014	6.91266e+06	22928236	9173701	8737202	7793582	7172289	8952770	8185267	14270418	9235547	13707920	6.63838e+06	10530786	13928719	12915093	16537625	12492002	20742834	27603058	25255380	21835672	29427572	33726452	16947190
A0A0D3AWV7	111518	128480	48539.2	31150.8	60303.5	Filtered	27912.4	70886.4	70149.6	70317.8	160124	112828	59306	194495	53591.4	64284.1	163929	22324	136231	148307	68404.2	143664	118340	131745	142798	82758.5	77467.9	20234.9	151969	29256.3	93075.2	65866.1	194926	242411	133869	97835.7	124179	181733	113993	129454	54946.6	24605.6	Filtered	42642.8	Filtered	153748	33515.9	Filtered	261926
A0A0D3AWV8	1	1	Filtered	Filtered	Filtered	Filtered	Filtered	Filtered	456001	Filtered	Filtered	Filtered	Filtered	20550.5	Filtered	Filtered	Filtered	Filtered	Filtered	Filtered	Filtered	Filtered	Filtered	Filtered	Filtered	Filtered	Filtered	Filtered	Filtered	Filtered	Filtered	Filtered	Filtered	Filtered	Filtered	Filtered	Filtered	Filtered	Filtered	Filtered	Filtered	Filtered	Filtered	Filtered	Filtered	1	Filtered	Filtered	1
A0A0D3AWX0	Filtered	Filtered	73328	Filtered	Filtered	Filtered	Filtered	Filtered	19976.4	Filtered	152095	66641.4	93609.2	192895	68202.4	Filtered	102399	91446	Filtered	74017.8	85093	85442.7	111797	121679	124430	113955	Filtered	Filtered	173706	Filtered	121081	221170	167609	166869	190045	112995	140861	242840	254063	264253	93130.6	66676.4	123637	183945	124554	137377	107125	98971.1	115914
A0A0D3AX03;A0A0D3DBX5	Filtered	29227.1	34468.3	Filtered	Filtered	Filtered	Filtered	12592.6	Filtered	Filtered	Filtered	Filtered	Filtered	32598.2	Filtered	8176.17	Filtered	Filtered	10120.1	Filtered	Filtered	Filtered	Filtered	Filtered	Filtered	Filtered	Filtered	12965.1	Filtered	19372	Filtered	Filtered	Filtered	Filtered	Filtered	Filtered	Filtered	Filtered	Filtered	Filtered	Filtered	38197.7	18548.7	Filtered	Filtered	2776.31	Filtered	Filtered	Filtered
A0A0D3AX18;A0A0D3DC71	Filtered	24847.8	Filtered	Filtered	1.89029	Filtered	Filtered	5613.76	Filtered	26170.7	9816.53	8789.5	11515	Filtered	6808.32	9535.96	7553.54	10079.7	7099.81	8858.45	13007.2	3562.63	5705.98	11819.1	9893.22	4316.49	7123.3	31768.5	4770.23	2679.65	8654.36	4566.85	15556.5	9504.69	8334.91	11479.5	10402.1	11935.6	16349.3	14729.4	9751.6	10394.5	21153.5	7009.39	2.16181	24775	21722.4	Filtered	10265.1
A0A0D3AX21;A0A0D3E0X8	Filtered	Filtered	Filtered	Filtered	Filtered	Filtered	Filtered	Filtered	Filtered	57300.5	Filtered	Filtered	Filtered	Filtered	Filtered	Filtered	Filtered	Filtered	Filtered	Filtered	Filtered	Filtered	Filtered	Filtered	Filtered	Filtered	Filtered	Filtered	Filtered	Filtered	47347.6	Filtered	Filtered	Filtered	Filtered	Filtered	Filtered	Filtered	Filtered	Filtered	Filtered	Filtered	Filtered	Filtered	Filtered	Filtered	Filtered	Filtered	Filtered
A0A0D3AX47	622542	473059	Filtered	699711	Filtered	626877	1.09867e+06	634096	Filtered	228091	Filtered	119006	203516	Filtered	66737.7	81274.9	72291.1	116960	77819	Filtered	41487.8	72995.5	95063.6	37380.4	84986	64836.5	115389	122302	96432.9	57349.3	58225.6	Filtered	Filtered	181434	131230	Filtered	94296.1	148254	105009	117370	689650	787040	609412	688247	Filtered	184700	Filtered	1237166	290343
A0A0D3AX58	2.86586e+06	1.55329e+06	1.10522e+06	1.42589e+06	1.28682e+06	1.9694e+06	758732	2.47411e+06	1.04993e+06	172710	1.11311e+06	383270	253814	1650331	600233	1.10229e+06	539045	386624	492032	252606	325382	1.31052e+06	1.03631e+06	587444	1.52457e+06	1179811	989131	1.15499e+06	1.23955e+06	545405	1.22321e+06	1507050	509574	559369	571179	363402	1.01838e+06	1.28546e+06	606824	658422	836573	533813	1.43308e+06	1.38675e+06	1.67527e+06	3.15778e+06	1.99118e+06	2.5915e+06	368945
A0A0D3AX62;A0A0D3CMQ8	181699	130585	311428	182265	206912	579064	478307	101708	186530	751538	272230	614506	593339	238144	282081	370779	227479	604492	610278	601689	850428	150882	344664	249572	127150	478100	176164	285256	186885	548328	159473	225175	354534	124951	295464	570861	156209	203151	256757	252574	146334	284216	149618	195079	61138.5	156072	123747	90247.1	375325
A0A0D3AX95	100502	222023	233377	175011	282628	300728	223831	266122	163785	199442	213760	213253	183963	189841	165926	213100	227944	243265	179814	293035	236095	173430	236672	241842	165599	234183	207148	281295	175891	248508	182968	221596	208389	192626	206378	228133	223068	239746	233804	234401	236721	291826	220716	202432	182640	175108	122795	248252	235228
A0A0D3AXA2	Filtered	Filtered	93041.1	Filtered	Filtered	222273	43551.1	Filtered	133336	498145	227641	261113	104834	Filtered	165708	346282	Filtered	Filtered	387268	177961	275150	Filtered	26937.8	190246	Filtered	206944	Filtered	218311	164632	86571.1	93109	349990	95723.7	27975.5	29223.9	34825.2	100648	106251	Filtered	44607.5	Filtered	404898	260228	Filtered	8875.06	79927.2	Filtered	Filtered	142316
A0A0D3AXA4;A0A0D3BY91;A0A0D3CTP5;A0A0D3DBA1;A0A0D3DCH3;A0A0D3DSW5;A0A0D3E142	11079.5	19750.9	Filtered	Filtered	Filtered	Filtered	8884	13532.5	78043.6	4514.04	31726.7	22910.4	8090.74	16047.5	Filtered	24200.4	17663.7	4471.81	6631.4	2467.12	4235.55	7878.23	14837	9730.11	20438.9	11427.4	10335.9	9448.56	16160.1	4398.76	19519.8	16512.7	6801.11	7622.33	7570.21	4415.59	5432.98	16191.3	7278.92	10652.9	6689.3	626.505	12702.5	Filtered	20448.5	16167.7	Filtered	19605.1	733.98
A0A0D3AXF1	Filtered	Filtered	107162	Filtered	Filtered	1.32451e+06	1	Filtered	1.54742e+06	1.23996e+06	Filtered	1	10967.4	3034.31	27068.1	12437.8	4959.28	57710.6	11168.7	24058.1	52843.1	Filtered	Filtered	Filtered	Filtered	29204.1	16223.3	1	10380.6	72416.5	271966	Filtered	53926.9	41818	1	26762.1	Filtered	Filtered	1	Filtered	Filtered	Filtered	Filtered	Filtered	Filtered	Filtered	Filtered	Filtered	1
A0A0D3AXH2	118842	93400.2	284804	122958	387148	639438	165883	104210	569838	265948	71244.5	157171	94290.3	129010	130076	122594	69363.7	120963	169173	159939	195461	82912.3	99864.1	80486.7	52349.4	78922	110020	77285.8	64385.2	113657	164613	61991.3	117058	91014.8	102344	166600	80408	94592.9	88107.1	83287.6	133779	176702	181344	99895.3	98096.7	51645.6	111992	100419	124114
A0A0D3AXI4;A0A0D3DCM7;A0A0D3E188	125141	70731.2	71211.2	73508	68120.8	450333	84908	102575	115611	47273.2	108181	76352.8	61871.5	83934	74560.5	70111.5	54844.6	39713.2	79998.4	73215	66598.8	77341.5	53364.2	62545.2	37930.7	56968.4	48531.9	28625.1	38508.8	63659.6	55318.1	58055.5	63503.1	49524.5	46112.4	68751.4	57194.6	87507.4	66011.8	96454.9	130337	82686.5	128070	135867	114646	65803	99791.9	136145	139968
A0A0D3AXM2	140036	49941.6	122395	118601	252701	339416	85541.9	105094	15834.1	984.977	8627.61	6638.7	1483.42	74156.2	4078.56	13885.7	3420.4	1067.09	1519.76	1062.59	2498.25	6034.16	2733.16	1432.07	3590.99	1692.31	2616.94	79132.9	Filtered	Filtered	Filtered	5125.98	8120.97	2576.82	53686.4	1717.35	2059.36	9056.81	3073.45	43170.9	192891	Filtered	37684.3	7781.08	91841.3	207881	138265	191211	551.388
A0A0D3AY08	5543074	3300278	2.22201e+06	3.67709e+06	3.7106e+06	3.05669e+06	1.67988e+06	3.55129e+06	2.26711e+06	397385	1.73422e+06	539422	542134	1.55779e+06	629834	1.40449e+06	1.23085e+06	658640	506344	541757	537233	1224249	1.08359e+06	1.50434e+06	2.0087e+06	928274	1.82558e+06	881680	1421226	824854	1.26792e+06	1.69295e+06	756437	2.07107e+06	1.8927e+06	695869	2.27299e+06	1.8869e+06	2.13046e+06	2.50849e+06	1.21857e+06	1.18185e+06	2.31806e+06	2.72999e+06	2.58271e+06	2.29703e+06	3.10668e+06	3577763	1.21678e+06
A0A0D3AY51	432536	223687	313986	384398	433773	280506	438263	277634	161115	256334	287078	274977	377722	104667	288849	161049	344198	359644	297116	309795	395980	253740	238766	337191	232553	269148	505008	342982	109776	386805	112856	184516	331381	397698	375827	282075	241181	245930	286318	197791	343396	313191	285850	290359	279924	345119	329496	389445	258766
A0A0D3AY78;A0A0D3DDK7	Filtered	Filtered	Filtered	Filtered	17973.2	571642	Filtered	Filtered	560706	272548	Filtered	Filtered	5886.01	Filtered	Filtered	Filtered	Filtered	16315.2	Filtered	7447.05	17219.5	Filtered	47938	Filtered	15701.2	Filtered	13109.8	Filtered	Filtered	42868.9	Filtered	Filtered	Filtered	63458.9	Filtered	4845.05	48179.5	Filtered	Filtered	Filtered	34508.5	86340.5	140501	Filtered	92285.1	74300.5	72815.1	52327.5	29782.9
A0A0D3AY81	85993.3	Filtered	87458	130059	135693	192324	245838	115672	80051.4	148790	Filtered	53986	158350	Filtered	Filtered	Filtered	Filtered	Filtered	117292	66732.8	144050	Filtered	47121.7	63800	Filtered	Filtered	Filtered	97601.3	Filtered	26919.3	Filtered	Filtered	64603.1	67608.9	Filtered	235964	Filtered	Filtered	87770.7	Filtered	162236	158475	98289	58152.8	143466	48762.3	143064	115390	148810
A0A0D3AYB8	Filtered	13914.6	Filtered	Filtered	Filtered	Filtered	Filtered	Filtered	10856	21000.5	18672.9	16454	23502.3	8926.94	10600.4	9948.75	7673.25	9997.81	2325.86	12608.5	13196.6	13087.8	6277.42	10950.7	2871.85	5693.87	7059.7	Filtered	7247.01	6126.35	6310.82	6093.25	14391	16928.8	9308.35	21548.5	12132.6	34752.5	24225.7	18161.7	Filtered	Filtered	Filtered	Filtered	5678.36	Filtered	Filtered	Filtered	18875.4
A0A0D3AYC6	47045.9	15994.5	123227	130931	1	Filtered	Filtered	21757.6	155602	84859.4	22710.2	83300.4	102069	49919.1	135629	78210.7	112046	122351	133314	177499	163047	62062	135145	108361	293798	122134	60024.4	203232	96366	293138	80653.1	138611	73185.1	147657	116477	93611.5	102753	68047.6	125847	145480	109761	106908	73477.1	33178.7	1.13537	40866.1	48416	1.03032	132979
A0A0D3AYD3	Filtered	12195.7	Filtered	Filtered	Filtered	Filtered	Filtered	Filtered	31654.5	39391.3	6183.86	24566	21060.7	Filtered	12735.2	11310.2	33444.8	19101.3	24258.9	44207.3	Filtered	23091.8	12014.3	3074.82	3471.19	12089.5	10018.2	34509.4	5319.07	11732.5	1	Filtered	20870.1	6231.7	Filtered	25752	5326.64	6031.37	Filtered	Filtered	Filtered	Filtered	Filtered	Filtered	16173.3	Filtered	Filtered	Filtered	8130.66
A0A0D3AYM3	163763	99259.6	174755	104804	Filtered	Filtered	112670	173958	1.33761e+06	404293	73709.1	556536	579124	461872	51201.4	165476	108438	73478.9	105484	53152.1	428810	94350.3	749201	51265.2	155249	769604	63017.5	148326	93065.8	136608	59860.3	104518	62709.8	641478	77777.7	13880.1	749455	14037.2	376523	66429	280528	74608.9	285044	131283	247061	187663	221469	382613	54291.8
A0A0D3AYN9;A0A0D3BF50	169497	229824	153200	110314	110989	159761	108229	110470	355288	81384.2	178061	139287	111300	167692	124387	166134	113736	133912	125877	129146	83294.2	186185	136824	114502	341635	238856	203552	325724	287867	191766	279290	234896	108938	137958	113623	104280	218464	134561	157606	103033	368813	435033	500458	610565	529266	705455	383028	541102	175096
A0A0D3AYT2	Filtered	1	Filtered	Filtered	Filtered	Filtered	Filtered	Filtered	554339	263228	258207	266821	335854	347803	374658	340896	349124	343231	488208	584878	481164	417501	431869	401780	299743	245704	367570	296933	176938	401503	332029	322595	246758	300174	264261	426181	348913	331104	264670	364589	Filtered	Filtered	Filtered	Filtered	Filtered	Filtered	Filtered	Filtered	448347
A0A0D3AYU0;A0A0D3E2N9	384240608	166370880	140587136	307005920	220347376	205502096	118846848	286629888	117054344	48208108	149238976	43677900	67163616	148020832	82184232	108919824	118999456	61399784	65956776	62154220	68108512	135661648	132300744	129553536	166163952	90644656	172918016	115420528	142764992	75675408	127826224	173021152	74132320	152895056	135047024	56718536	173965664	163709536	125685568	154108896	100466384	57000712	171557296	202909152	199432128	172616096	187868560	228932480	88630632
A0A0D3AZF8	144430	118676	149313	191774	138953	137654	119688	176187	71595	69016.5	180033	174336	137499	177087	127095	136644	102776	100731	96398.3	106359	57028.5	119685	102112	106445	110227	94025.6	86504.8	69080.4	114631	101212	69846.2	197406	67584.6	72940.1	102341	121343	118465	99153	140524	97235.8	84012.7	97613.3	50722.9	86149.5	97191.5	159378	89193.9	119825	100282
A0A0D3AZI2	Filtered	34373.3	Filtered	Filtered	Filtered	Filtered	Filtered	Filtered	Filtered	Filtered	Filtered	Filtered	Filtered	Filtered	27913.1	Filtered	Filtered	54766.9	Filtered	Filtered	68063.7	Filtered	Filtered	Filtered	Filtered	56788.1	Filtered	Filtered	Filtered	Filtered	92898.4	Filtered	9371.75	37431	39017.4	37053.8	Filtered	Filtered	38626.2	19345.4	Filtered	Filtered	Filtered	Filtered	106996	Filtered	Filtered	Filtered	64128.7
A0A0D3AZJ2	75576.1	72330	77272	Filtered	91451.8	59104.4	109720	15475.1	537472	139854	141324	154299	119675	126457	171192	113917	130966	169503	239856	264936	248387	187933	180284	133797	95969.2	133683	90456.8	138275	80584	113600	178138	68559.8	213566	76884	136544	157528	192955	156254	123254	116184	97066	111094	43697.5	47362.5	62428.3	70843.1	46044.4	78422.8	162481
A0A0D3AZJ4	Filtered	Filtered	Filtered	Filtered	Filtered	Filtered	Filtered	Filtered	358269	59058.2	86929.8	115255	84338.4	15341.8	87550.3	93648.2	81499.5	67665.2	88800	108960	110548	90231.5	81384.1	100272	100174	56515.1	79524.4	64411.8	73974.8	88876.1	56486.5	112343	105886	74640.2	66799.7	108060	113007	116867	100458	143457	32711.8	Filtered	52128.4	Filtered	Filtered	10666.8	9092.25	5578.09	74555.9
A0A0D3AZJ5	149893	180706	Filtered	165253	Filtered	Filtered	Filtered	195433	Filtered	68279.8	110722	55565.1	79364.5	Filtered	59599.3	165122	85037.3	46996	31060.5	45416.3	23051.6	100603	102602	13114.2	138889	62789.9	75260.1	104723	119722	47021.9	80771.6	153459	Filtered	Filtered	97806.9	Filtered	86259.9	100172	98080.7	176093	86757.8	84126.7	132189	219493	139903	181183	178466	Filtered	Filtered
A0A0D3AZN5	2207282	1176759	901790	1.91106e+06	Filtered	1.06315e+06	1.36615e+06	1789334	593943	803100	1.28118e+06	548131	708388	774244	664604	933497	826422	628849	423834	513483	626731	742216	656865	822197	1.1023e+06	634116	1.31253e+06	794569	607969	652127	661820	855016	676218	1.35148e+06	1.13039e+06	672100	941910	986769	1.1455e+06	959802	710405	639539	1.06951e+06	1.41171e+06	1.32533e+06	1.17697e+06	1.26389e+06	1.5577e+06	804565
A0A0D3AZN7	727799	441788	359741	568318	381919	325093	631181	650900	96212.8	330790	489946	337030	379045	321499	393005	407611	340966	331778	244175	369903	225386	328557	315659	234732	416748	314162	446610	515369	277051	330886	240698	397636	222986	397633	395216	199491	235041	348794	380242	384938	491669	396673	420597	509769	551769	554215	509408	557100	177296
A0A0D3AZP6	210378	167829	168089	212560	290652	107118	105539	130096	183185	47669.1	116709	109366	105646	166113	101514	137043	127692	131602	134197	131088	113006	132665	123380	131555	108890	108917	63620.6	133427	75807.7	143033	89649.6	61924.2	117329	101229	144873	120021	111378	140238	119731	101279	152094	139156	111388	156165	252537	167786	241258	293407	92325.6
A0A0D3AZQ1	727775	90698.9	206806	405453	345980	263414	Filtered	629381	Filtered	131561	Filtered	Filtered	1	Filtered	1	Filtered	Filtered	Filtered	Filtered	Filtered	Filtered	Filtered	Filtered	Filtered	Filtered	Filtered	Filtered	Filtered	Filtered	Filtered	Filtered	Filtered	Filtered	6063.62	Filtered	Filtered	1	Filtered	Filtered	Filtered	388429	199541	350702	Filtered	281173	356007	339794	410481	Filtered
A0A0D3AZR4	Filtered	Filtered	Filtered	Filtered	Filtered	Filtered	Filtered	Filtered	Filtered	Filtered	282.598	Filtered	Filtered	Filtered	Filtered	Filtered	Filtered	Filtered	Filtered	Filtered	Filtered	Filtered	Filtered	Filtered	Filtered	Filtered	Filtered	Filtered	Filtered	363.487	Filtered	Filtered	Filtered	Filtered	Filtered	Filtered	Filtered	Filtered	Filtered	Filtered	Filtered	Filtered	Filtered	Filtered	Filtered	Filtered	Filtered	Filtered	Filtered
A0A0D3AZU2	6648.26	15475.9	3320.49	6015.18	4211.23	Filtered	12103.4	13795.9	27797.8	6829.61	16833.2	6728.5	9882.81	13034.4	9837.94	16597.2	12973.2	11168.2	11235.2	8660.8	10065	16296.1	17336.5	17588.5	18148.3	12062.4	14583.4	10089.5	15450.7	15455.7	16477.8	19169.7	8449.31	9957.91	8541.7	6930.28	12683.8	12923.9	12665	19046.5	10462.1	14726.4	12510.8	14540.5	22482.9	11769.3	19425.7	25299.7	14394.6
A0A0D3AZY0;A0A0D3AZY1	Filtered	Filtered	Filtered	Filtered	Filtered	Filtered	Filtered	Filtered	9827.25	41030.8	Filtered	46760.8	91770.4	Filtered	52600.7	37693.9	63281.3	72201.6	89128.5	107495	50643	34449.8	37637.1	57813.4	10744.7	29148.7	17620.3	Filtered	5288.97	Filtered	Filtered	15661.7	24560.3	53360.2	30394.2	113162	Filtered	24789	15478.8	Filtered	Filtered	Filtered	Filtered	Filtered	Filtered	Filtered	Filtered	Filtered	63272.7
A0A0D3AZZ4	2423.24	4710.82	Filtered	Filtered	Filtered	Filtered	Filtered	4135.2	31580.3	8038.77	8346.34	7066.34	9718.51	6919.27	16730	9763.77	9976.7	10251.3	18251	16234.8	26093.5	14653.2	13449.1	16685.2	5542.33	17521	12499.7	3359.18	6899.12	15054.4	15192.8	16723.1	30578.4	26416.8	10604.2	34616.1	22352.6	25215.1	24952.4	25583	6227.92	4648.67	4385.13	5209.03	6479.36	5408.2	4804.26	5855.4	15075.2
A0A0D3B002	Filtered	Filtered	1	Filtered	Filtered	Filtered	Filtered	Filtered	Filtered	Filtered	Filtered	Filtered	Filtered	Filtered	Filtered	Filtered	Filtered	Filtered	Filtered	Filtered	Filtered	Filtered	Filtered	Filtered	Filtered	Filtered	Filtered	Filtered	Filtered	Filtered	Filtered	Filtered	Filtered	Filtered	Filtered	Filtered	Filtered	Filtered	Filtered	Filtered	7973.09	Filtered	Filtered	Filtered	Filtered	Filtered	1	Filtered	Filtered
A0A0D3B080	Filtered	Filtered	27070.2	Filtered	Filtered	203376	Filtered	Filtered	51637.4	68559.5	Filtered	Filtered	1914.23	9896.51	7214.01	17534.9	Filtered	12797.5	9491.06	8817.78	8814.82	23803.1	Filtered	10339.8	Filtered	4384.25	Filtered	6932.12	Filtered	26610.6	148643	13222.7	6436.7	Filtered	Filtered	7993.44	17919.6	7914.2	12690.3	Filtered	6892.23	Filtered	Filtered	Filtered	Filtered	Filtered	Filtered	Filtered	24935.3
A0A0D3B0A4	Filtered	Filtered	Filtered	Filtered	Filtered	Filtered	1	Filtered	10688.1	1623.61	Filtered	Filtered	1	Filtered	Filtered	Filtered	Filtered	1	Filtered	1	1	Filtered	Filtered	Filtered	Filtered	Filtered	Filtered	Filtered	Filtered	1	Filtered	Filtered	Filtered	1	Filtered	Filtered	Filtered	Filtered	Filtered	Filtered	Filtered	Filtered	Filtered	Filtered	Filtered	Filtered	Filtered	Filtered	1717.53
A0A0D3B0A9	703252	524803	407309	637374	661584	559041	591429	598590	80925.3	489453	502875	405453	581512	373649	397138	286994	358517	448190	444260	535162	415963	352638	333674	366698	386637	361010	437341	421049	258009	393656	310810	363488	312535	418611	385942	371156	260433	362020	421957	458281	631767	453282	483931	556067	662601	692680	573108	711384	280928
A0A0D3B0B3;A0A0D3EGU2	Filtered	3130.02	5568.84	Filtered	Filtered	Filtered	29726.4	10192.8	2651.15	1	Filtered	324.617	Filtered	Filtered	1	4560.65	Filtered	Filtered	1935.62	1031.91	2726.51	440.712	Filtered	Filtered	1	Filtered	Filtered	Filtered	Filtered	Filtered	Filtered	Filtered	Filtered	Filtered	Filtered	3812.93	3147.21	1652.27	2510.43	Filtered	Filtered	3958.95	Filtered	Filtered	Filtered	Filtered	Filtered	Filtered	Filtered
A0A0D3B0D5	326372	144434	205955	166399	240792	131759	161374	157274	502535	162948	250422	252945	188367	294048	243199	217086	174909	220825	270057	233435	199256	205114	189759	192755	136371	203057	171130	205227	152814	224156	152137	142880	290439	105413	184745	241083	180159	180582	105593	186921	188476	173180	121537	141654	153878	142299	149332	103412	247695
A0A0D3B0D7	229459	94375.3	161169	169637	152999	441683	171187	190636	234215	99440.1	136525	133772	108401	195001	144766	146354	144454	115924	159473	147591	169241	142045	128936	116571	150661	146037	107853	109555	124652	167936	106312	145940	180812	124202	159027	152362	206393	170060	114600	194072	218132	180534	153653	198358	214659	174397	234659	271764	197791
A0A0D3B0G3	Filtered	16981.7	10087	Filtered	Filtered	200343	Filtered	Filtered	77925.4	42716.2	Filtered	Filtered	Filtered	Filtered	Filtered	Filtered	Filtered	Filtered	Filtered	Filtered	Filtered	Filtered	Filtered	Filtered	Filtered	Filtered	Filtered	Filtered	Filtered	7870.29	19954.6	Filtered	7031.84	8970.82	Filtered	Filtered	Filtered	Filtered	Filtered	Filtered	Filtered	Filtered	Filtered	Filtered	Filtered	Filtered	1	Filtered	Filtered
A0A0D3B0G9;A0A0D3EGH6	507907	382154	395732	338380	428382	748674	370865	459480	671564	553757	283298	275664	357909	288244	348764	361720	381597	365280	316440	429837	457453	372960	460232	387205	249948	257096	286951	321775	232815	436096	485111	412683	253751	246938	335514	310110	338940	410432	314220	446830	355966	295562	194016	258031	267081	233187	289955	366586	332548
A0A0D3B0H8	47161.1	70480.7	65824.4	41301.7	63806.3	49466.5	56676.1	26620.4	Filtered	28497	26369.2	38430.7	38974.8	35615.2	49549.1	48597.4	58194.8	44075.9	55133.9	61620.4	66774.5	55902.7	62631.6	52036.6	41681.3	53965.8	59524.6	42080.4	44859.7	70331.1	47722.2	101439	32975.2	38774.3	30068.9	27615.9	43437.3	24725.1	24938	31977.8	55497.3	23702.3	67459.1	35025.3	9598.1	101547	26451.1	54011.5	52433.4
A0A0D3B0J9	58511	82057	Filtered	81016.6	Filtered	Filtered	299719	100723	Filtered	25479.6	20599.8	9749	36946.6	28619.6	23763.4	33546.3	11538.8	25033.6	4628.52	11883.2	3488.24	13819.4	18351.7	13545.4	12175.7	13720.5	28523.4	26535.3	Filtered	21934.4	24137.8	11993.4	23977.5	59019.7	14682	66789.5	37075	99095	72076.5	22779.9	194953	267700	292614	320826	311234	261775	216129	429703	99161.8
A0A0D3B0N8	45758.1	Filtered	Filtered	Filtered	Filtered	Filtered	17445.6	42355.4	Filtered	44252.2	36764.5	38909.9	17607.3	Filtered	23354.9	28218.3	32926.8	43708.1	46369.6	33927.5	29094.6	40757	24628.1	67387.7	72391	79285.9	58068.6	64569.5	58400	38881.5	Filtered	Filtered	45586.7	13182.2	Filtered	32348.3	69529.6	Filtered	21663.5	35835.6	588513	349561	286844	242291	152823	467065	154829	Filtered	Filtered
A0A0D3B0Z5	121656	71509.6	Filtered	161040	81474.6	Filtered	131399	Filtered	47785	28534.7	66243.5	57890.8	38586.9	30093.9	31333.8	Filtered	19418.8	65881.9	91327.7	73799	36967.6	38606	21716.4	64824.7	50753.3	108555	82522	129427	15463.4	87075.8	29876.9	Filtered	232561	122016	61407.2	132034	50734.8	77023.4	50260	112306	Filtered	Filtered	Filtered	Filtered	52968.4	Filtered	30221.8	Filtered	69444.1
A0A0D3B114	80560.4	6720.26	30965.6	95353.1	65367.3	167969	40449.2	41308.9	59323.3	59292.9	80246.1	74703.8	73577.1	94680.5	43671.7	116748	74126.8	100982	95087.8	78665.8	90555.1	69413.8	57743.9	68049	180407	124744	96131.6	122123	102697	148656	108748	124503	32481	82990.2	142997	125962	105359	157665	153427	99603.7	111557	101564	99373.7	105037	63553.4	138389	158093	91429.2	106979
A0A0D3B163	2756987	1959357	1330388	4033256	2.83168e+06	3.59179e+06	2.16803e+06	2.80107e+06	2.32664e+06	542792	1.72363e+06	584222	496970	1.73268e+06	493923	1.09092e+06	1099146	492047	816418	819608	471562	1.23538e+06	966792	1.27571e+06	1.49503e+06	888042	1.6031e+06	1.10831e+06	1228992	705700	950825	805579	1.08568e+06	1.66481e+06	1.4217e+06	911671	1.60395e+06	1.66638e+06	1.24024e+06	1.32774e+06	1.35251e+06	1.07571e+06	2.65188e+06	2.73253e+06	1.67553e+06	3421224	1.59774e+06	1.35138e+06	764589
A0A0D3B164	Filtered	401652	145892	422117	Filtered	246063	323299	427042	828054	1.13353e+06	1.28236e+06	1.55092e+06	1.15944e+06	1.85622e+06	1.10706e+06	1.19066e+06	240761	193871	241080	331162	198532	227891	288398	240585	477279	219339	337509	672444	403898	224799	466519	454049	545595	775210	371451	385019	798975	857859	314998	787568	181051	157530	293427	525633	533872	248946	339432	535998	363928
A0A0D3B192;A0A0D3EFB6	321036	301148	517448	443566	74809.7	225179	Filtered	318005	62698.4	180593	7350.15	199907	197112	31494.4	244866	149558	211025	152803	101717	143146	300902	87120.1	124851	23120.9	241219	245433	147690	409758	481346	408016	124244	354155	208802	Filtered	131001	123116	117441	44168.5	153372	Filtered	446568	582800	632238	704836	297706	814868	695970	316571	145518
A0A0D3B1F4	398802	194054	149722	128019	200359	132937	156189	111445	158656	116646	124048	136477	124725	200656	131164	113283	107061	131230	123199	154294	112902	123735	130418	141439	128437	118864	119288	67633	78933.3	115767	125691	98998	130163	95430.8	141210	126693	184261	217602	143284	143172	178632	114689	59394.3	93898.4	57478.5	85494	94536.8	123111	105064
A0A0D3B1H4	1667244	1.59249e+06	999550	1.01446e+06	1.01852e+06	1.88914e+06	1.49953e+06	1.40712e+06	558201	552451	748580	551729	743148	814335	611508	714540	554874	545422	371827	612168	631298	725271	706102	621343	946901	600729	818605	772254	928579	782708	861812	1.04416e+06	625987	1278570	832592	708211	1.10983e+06	1.33704e+06	1.11752e+06	1287393	1.01355e+06	796621	936168	1.06423e+06	1.28216e+06	1.50509e+06	1.39299e+06	1727784	955241
A0A0D3B1I3	21006.8	35113.7	56302.7	33509.4	22981	31385.5	39109.5	27462.2	8119.99	20418.2	25484.8	38440.4	21397.6	34636.3	12552.6	30026.3	15222.5	15195.1	15793.7	22243.7	17476.3	21888	14304.3	17293.6	23779.9	11895.3	17239.4	26461.3	25651.1	19445.5	14965.6	13116.1	21173.4	13007.4	23896.4	19618	24989.4	25097.1	25416.6	14250.2	39988.2	43621.2	36077.6	49274.9	57798.4	26249.8	65267.8	110296	16424
A0A0D3B1J4	103255	86887.6	89459.4	164640	53380.8	118904	111646	187668	210434	93713.1	331987	143982	128048	266652	190910	220179	302776	153320	218574	202885	181046	302651	283915	327379	388336	253699	376650	283871	308278	193136	275154	351961	75259.7	184229	96078.1	64291.1	103498	126043	196578	195047	131243	130179	198786	291439	268338	316795	133910	403320	180412
A0A0D3B1J7	155511	95730	98907.4	179471	145895	143432	151239	144736	75790.6	51207.7	102515	85464.4	93030	145937	92694	158122	86161.3	83601.6	73234.2	81022.4	92024.7	104799	94230.6	79829.6	76368.5	47422	65128.9	133482	108429	60931.2	65881.6	55115.4	89902	76117.5	71603	88229.1	118612	32360.2	106482	109436	65224.1	58674.8	61994	85042.5	70019.4	63046.2	64207.6	109522	48926.7
A0A0D3B1N7	178750	122435	80421	95526.4	138661	113494	119012	130483	411708	61825.2	105419	69032.7	49447.4	81225.5	64430.8	107490	77402.9	71285.3	84259	93938.8	67823.3	94097.7	88298.1	102622	108894	77025.1	81965.5	93198.9	118966	57546.2	85074.6	128705	95085.9	98391.2	98077	79703.8	196219	150978	87484.3	95255.6	134107	61058.9	100416	155381	149071	179114	101741	174544	110967
A0A0D3B1P5	Filtered	18751	Filtered	11900.7	Filtered	Filtered	Filtered	10035.3	Filtered	1	Filtered	295.159	Filtered	Filtered	Filtered	Filtered	4999.06	10736.5	1	Filtered	1	Filtered	1	Filtered	9412.16	7546.08	5492.79	4208.61	9617.66	10732.4	6640.88	5808.74	24204.4	17106.8	13072.1	16492.4	21992.9	12721.3	4002.47	11746.9	Filtered	21974.8	28914.5	11116.9	8389.79	10368.2	31692.4	Filtered	7975.12
A0A0D3B1Q2	755112	420918	Filtered	219726	47555.6	571738	247991	462058	5104	15035.5	Filtered	8142.19	7739.06	13890.1	6717.1	6876.4	4261.32	9521.8	11355.5	6073.43	6911.89	13616.2	14788.8	15160.2	Filtered	6110.91	12410.9	17463.8	19463.6	2388.36	7969.97	Filtered	2542.16	14733.7	8797.66	29083.6	22600.6	25822.7	14461	6817.65	Filtered	25400.7	5690.03	Filtered	22711.3	13066.7	53229.2	Filtered	8678.66
A0A0D3B1Q3	2.44772	37750.4	7682.96	1.48519	1295.25	Filtered	10645.3	1.37507	43802.9	16394	32714.5	17356	24575.1	26513	14356.6	17479.3	20929.5	23181.8	24852.7	19817.2	19331.8	27036.6	20105.8	28019.1	31085.6	11720.3	16096.9	28730.4	21902.1	22902.8	26651.9	21992.4	30872.6	21613.7	26039.2	27256.3	31432.2	27625.2	29109.9	36310.9	51270	66285.9	42214.5	58032.7	1.20309	16577.6	1.09079	12892	23110.9
A0A0D3B1Q4	1.31656	51140.5	91337.8	26984.6	Filtered	801563	44864.9	58672.5	303246	233247	69251.8	99536.3	70541	21209.4	138053	103782	77289.5	82388.2	99329.7	144202	171810	74899.2	88781	108279	25223.1	118338	39387.4	125620	57146.1	90278.7	155474	92658.8	100643	47341.2	38413.4	112475	90176.2	86584.5	34432.2	56426.5	184112	181525	132751	Filtered	147761	104131	49850.7	94290.7	93751.6
A0A0D3B1S1	65970.6	33951.4	8741.92	34561.3	4268.64	Filtered	6580.07	23238.3	102706	25766.9	64959.9	28886.9	37677.5	39572.6	26103.1	62573.3	44388	18702.7	23748.5	12887.4	12912.9	33187.7	46739.7	48367.3	54566.8	39767.2	38329.5	41780.5	42989	20167.2	45126.9	30984.5	18547.6	36271.9	33594.2	14907.7	43306.3	50649.6	29139.9	30615.7	14179.8	10920.6	11219.5	21860.5	16933.5	21699.2	24007.2	59918.9	45634.9
A0A0D3B1S7	Filtered	Filtered	Filtered	Filtered	Filtered	Filtered	Filtered	Filtered	133246	143168	Filtered	Filtered	46400.6	Filtered	Filtered	17735.5	Filtered	23617.6	44239.8	77953.7	95682.5	49230.1	14493.8	34782.8	6246.68	Filtered	Filtered	Filtered	Filtered	32890.4	125421	Filtered	14595.3	18175.8	Filtered	17208.4	103615	Filtered	Filtered	Filtered	6317.29	Filtered	Filtered	Filtered	Filtered	Filtered	Filtered	Filtered	Filtered
A0A0D3B1U3	70597.2	37893.3	26621.5	43714.1	62301.7	56670.7	39100.1	59811.6	19452.6	31663.1	42081	31603.2	48170.2	42847.8	34091	39141.9	34615.7	37195.3	32892.1	37284	36320.8	35131	37720.3	40638	36697.4	28551.6	37953.4	31904.9	33342.5	34221	38398.7	42223.2	28610.1	42140.2	34729.2	33996.7	41004.4	51804.4	46942.8	43387.4	28826.6	25755.9	31453.2	31858	48858.5	37484.5	53462.8	60752.2	42610
A0A0D3B1W0	Filtered	Filtered	Filtered	Filtered	Filtered	Filtered	Filtered	Filtered	Filtered	Filtered	Filtered	Filtered	Filtered	Filtered	Filtered	Filtered	Filtered	Filtered	Filtered	Filtered	Filtered	15955.7	Filtered	Filtered	Filtered	Filtered	Filtered	Filtered	Filtered	Filtered	Filtered	Filtered	24460.3	41554.9	45658.9	38908.6	19365.2	35579.1	40126.8	37681	Filtered	Filtered	Filtered	Filtered	Filtered	Filtered	Filtered	Filtered	Filtered
A0A0D3B207;A0A0D3EDW4	Filtered	Filtered	Filtered	Filtered	Filtered	168788	Filtered	Filtered	110667	77939.3	2832.2	Filtered	Filtered	Filtered	5716.23	Filtered	9153.45	10439.2	Filtered	7942.08	Filtered	8393.06	14305	9945.55	Filtered	Filtered	4166.78	Filtered	Filtered	23550.1	93654.1	Filtered	18506.7	14776.2	Filtered	10998.2	21947.6	Filtered	Filtered	Filtered	Filtered	Filtered	Filtered	Filtered	Filtered	Filtered	Filtered	Filtered	24265
A0A0D3B232	288444	222912	466339	164332	310864	570843	352723	243356	24243.6	747661	66926.3	243230	877033	255257	824627	302632	92881.2	296567	172806	209540	264627	163058	174245	111003	208989	275493	262779	335339	219418	357691	145789	250856	453942	197337	236151	419317	267443	206779	169991	298217	245695	208511	157849	42977.8	44170.3	187141	133292	116911	366434
A0A0D3B244	5593110	4790022	4.11856e+06	3.77296e+06	5817941	2.24864e+06	5933954	1.76725e+06	1.60285e+06	2.57063e+06	782061	1.93156e+06	2.94411e+06	2655183	1.14769e+06	957304	2.28802e+06	2506297	3.55997e+06	3.26368e+06	2.65704e+06	1.58934e+06	1.42629e+06	160396	2.34199e+06	2.17845e+06	1.11897e+06	3.40166e+06	1270017	1493044	271308	601156	1.14165e+06	2.47464e+06	1.14652e+06	2.58498e+06	715949	1.87874e+06	222214	1.12623e+06	1.16994e+06	472663	1537966	469533	962594	3.80661e+06	709945	880863	1377234
A0A0D3B249	11574070	9452275	9068808	10770154	10836234	6671831	7337777	5.66329e+06	8891124	2.8759e+06	9238558	4931036	4541586	7.76486e+06	5094842	6.42438e+06	6250649	4606621	4920110	5143585	4255418	7.12807e+06	6324760	3127513	8770770	6978773	8927428	3.09522e+06	7.45232e+06	5.79653e+06	6819826	10203493	4398121	8496610	7.01568e+06	5608423	8476139	7574296	8072759	8843693	4918051	3.3735e+06	3.79984e+06	3.48436e+06	6581744	4.81795e+06	5496731	6.2056e+06	6.00419e+06
A0A0D3B281	69755.2	45210.3	44744.2	29748.7	66767.9	43601.9	49668.5	37347.2	10278.9	10612	13709	11277.6	16429.3	42297.6	13977.9	14436.4	5826.49	7433.47	5082.46	8287.99	7788.18	11264.6	5225.78	8835.46	7406.06	9072.09	6134.92	6437.77	6593.37	8813.81	11521.3	1	13820.8	12208.8	15049.3	18833	8416.97	25381.9	24880.1	17140.8	30800.5	16650.3	37284.7	56348.3	52599.4	27747.5	50982.4	62762.5	6746.08
A0A0D3B287	11656.7	1730.14	Filtered	9674.76	4709.48	Filtered	12931.7	28787.2	Filtered	5039.11	28712.4	17599.8	14826	3957.41	3857.17	17496.3	24390	8519.47	13710.9	20985	8688.25	21853.3	18931.7	17690.5	16239.7	13269	10617.9	1407.15	18138.8	9897.72	21224.7	19170.7	14981.9	19852.6	4990.06	14802.7	14756.3	23216.1	29223.8	34470.9	8806.12	1307.94	Filtered	1	19053.2	5708.01	24516.3	30022.3	17991.2
A0A0D3B2D1;A0A0D3B2I5	1.65286e+06	1.24644e+06	1.07748e+06	3594350	1.81754e+06	3.45855e+06	1.93677e+06	2.7042e+06	2.42873e+06	2.26134e+06	3.60839e+06	1.7077e+06	1.40015e+06	2.57332e+06	1.31553e+06	1.37884e+06	2563330	1404568	3.00139e+06	2.53669e+06	1368029	1.49331e+06	1.98814e+06	3.66495e+06	4927967	2.31505e+06	3.15689e+06	2.42728e+06	1.79056e+06	1.32707e+06	3013893	2.05056e+06	1.5886e+06	992214	976787	1.01307e+06	1.14414e+06	1.3726e+06	969766	831320	2.34938e+06	1.23902e+06	2.24902e+06	2.1133e+06	2.50435e+06	1.27273e+06	1.97352e+06	2.23998e+06	1.13e+06
A0A0D3B2D7	Filtered	65666.2	Filtered	Filtered	Filtered	28932.4	Filtered	35645.6	26067.9	35891.7	7550.09	662.018	18569.9	Filtered	41491.8	18325.1	11122.8	16040.2	17151.5	14418.7	9454.05	16240.8	10928.2	9162.96	23897.7	24068	32163	45328.7	20381.3	24952.3	22696.8	1	37504.4	34523.1	40477	39536.5	16845	47557.4	47402.8	46740.5	124012	56121.3	23638.6	108963	68636.1	28073.9	80487.4	185490	40644.6
A0A0D3B2F6	2347.39	Filtered	Filtered	847.726	Filtered	2434.62	Filtered	710.754	Filtered	Filtered	Filtered	Filtered	Filtered	1	Filtered	Filtered	Filtered	Filtered	Filtered	Filtered	Filtered	Filtered	Filtered	Filtered	Filtered	Filtered	Filtered	Filtered	Filtered	Filtered	Filtered	Filtered	Filtered	Filtered	Filtered	Filtered	Filtered	Filtered	Filtered	Filtered	Filtered	Filtered	Filtered	Filtered	Filtered	Filtered	Filtered	Filtered	Filtered
A0A0D3B2G0	26117.2	29776.8	Filtered	Filtered	Filtered	Filtered	Filtered	Filtered	1834.35	16225.5	44613	24979	10456.9	Filtered	12409.5	34154.3	12467.6	29734.7	15942.7	18071.3	22118.4	27390.7	23499.9	31777.8	52465.9	16753.1	51018.7	19010.4	33535.5	43431.6	40773.8	20459.4	15385.1	44308.6	Filtered	32533.3	24509	55014	72750.2	56017.2	Filtered	Filtered	Filtered	8386.63	Filtered	Filtered	Filtered	Filtered	33524.7
A0A0D3B2P5	Filtered	Filtered	Filtered	Filtered	Filtered	Filtered	Filtered	4887.93	917409	31858.9	90303.7	Filtered	43149.5	61009.6	4465.14	Filtered	28844.2	Filtered	36136.9	59295.9	77556.6	51915.3	Filtered	33005.3	Filtered	Filtered	Filtered	1	Filtered	Filtered	Filtered	Filtered	37320.7	34004.2	4154.59	39051.4	8839.74	Filtered	Filtered	Filtered	Filtered	6201.5	Filtered	59560	82589.3	70858.2	Filtered	Filtered	67580.5
A0A0D3B2V3;A0A0D3ECB7	1.77956e+06	356167	248460	518185	465339	9258777	3.68623e+06	2.17805e+06	89219.8	1.07401e+06	1.45812e+06	671460	321460	136083	147695	148627	347093	62803.6	86902.1	423650	147778	610167	542171	438347	472096	587651	1.24774e+06	391837	343276	235997	275870	4636789	36581.1	415641	360708	666316	466889	435904	634203	708168	1.70171e+06	2.04145e+06	1.2101e+06	1760622	1.25571e+06	667640	1.21406e+06	4.64598e+06	986034
A0A0D3B2W3	21519.6	25471.6	Filtered	Filtered	Filtered	Filtered	Filtered	29395.4	43626.2	11430.6	Filtered	2465.82	7048.6	Filtered	2654.01	Filtered	13850.5	7118.29	10456.6	11077.2	9751.92	8150.03	Filtered	20837	11489.9	14297.2	17514.3	13486.7	8908.33	15337	32872.2	9337.13	19306.1	21513.1	Filtered	12867.4	Filtered	12219.8	Filtered	16903.4	32933.9	44006.3	28603.1	35838.3	35631.7	16923.9	24872.9	63811.1	23200.3
A0A0D3B2X0	27097.9	53038	26356.7	88892.4	69963.4	Filtered	79593.7	44057.1	646.433	55038.1	69704.9	46465.4	65380.8	43812	33938	62997.3	51053	40106.8	42611.4	59515.5	39976.5	41134.4	43936.1	55263.8	44261.1	38158.9	51731	47430.6	52230.4	26668.7	34327.2	43672.2	24488.5	43054.9	33473.8	25806.8	36345.4	38490	71901.6	1	57079.4	47943.7	52456.9	Filtered	61100.5	115798	53628.8	Filtered	37061.6
A0A0D3B303	Filtered	43500.7	12265.9	Filtered	Filtered	Filtered	18265.1	44355.4	39313	19329.4	64035.4	44328.5	37973.8	62751.4	33817.2	30939.8	35681.9	30376.9	31510.9	27738.1	17590.7	37797.5	38792.1	21224.2	47321.9	28287	32065.2	Filtered	51563.2	17296.4	46384.5	26270.5	14687.3	37178.5	37563.3	30975.6	31636.6	53571.9	41194.3	75626.8	31535	31019.6	39925.6	36331.5	45370	49729	40259	64923.6	22069.7
A0A0D3B360	166130	31974.7	211432	145279	238686	191996	216692	11001.7	156426	280147	198428	258033	268253	117474	255179	131530	139992	202097	349030	343661	253486	137371	154719	147431	70710.1	131717	130436	149036	102274	201589	139601	104435	204280	80183.5	100483	273188	158793	60962.5	56961.3	112188	190982	166454	92682	80933.7	88643.9	132525	101958	136314	296265
A0A0D3B371	Filtered	96162.3	79369.9	167824	132989	Filtered	159621	117052	Filtered	144858	Filtered	155653	174046	44751.2	100316	75232.8	56642.1	98373.4	81925.7	137519	80778.9	117037	77983.6	66382.9	46825.9	45828.6	108213	115113	86851.2	63617.9	66196.5	28904.1	60726.9	40532.8	52908.5	53242.6	41892.8	77309.4	96687.9	47686.9	72079.9	65450.1	51909.4	50763.1	57177.3	49075.9	78067.1	126065	43988.8
A0A0D3B399	120288	96059.7	199406	107709	71719.2	188769	176088	27308.9	93601	166765	Filtered	88256.7	113245	90062.8	123961	24817.7	61487.4	157404	3937.87	166069	129073	6116.36	21690.3	41313.4	17572.9	82963.9	897.137	154293	Filtered	194549	47472.2	Filtered	214497	95624.9	143471	377149	109046	179320	162446	122246	237283	169405	74799.4	51312.3	Filtered	136401	175560	Filtered	517562
A0A0D3B3A4	Filtered	14172.9	Filtered	18867.4	Filtered	Filtered	Filtered	Filtered	23078.3	56219.8	95388.4	81118.9	67931.1	95785.9	17308.8	62150	62049.8	82418.7	54680.2	22532.5	66687.4	72890.9	78713.3	85657.9	72990.9	21250.3	41834.9	5949.78	63132.5	151694	32375.8	17945.6	5056.51	27385.8	26135	8363.77	48038.6	35326.3	29980	20256.2	Filtered	4375.62	36715.7	3569.21	77785.5	45028.8	42974.9	34157.5	20012.5
A0A0D3B3C0	Filtered	Filtered	Filtered	Filtered	Filtered	Filtered	Filtered	Filtered	14462.5	4614.13	Filtered	Filtered	Filtered	Filtered	1299.93	7327.46	14036.6	11476.2	18946.3	22197.4	11118.7	12715.7	9755.11	14030.5	13770.8	12006.7	6656.78	19185	4422.29	9094.12	7104.44	6921.86	16181.9	6795.53	13336.7	8764.83	12521.9	10039.4	8358.52	8795.59	4913.26	6086.81	4656.33	5744.52	5461.71	5568.24	5155.93	Filtered	11904.3
A0A0D3B3C5	12609.6	26031.6	Filtered	6408.7	Filtered	Filtered	2785.32	17656.4	Filtered	Filtered	Filtered	Filtered	Filtered	Filtered	Filtered	Filtered	Filtered	Filtered	Filtered	Filtered	Filtered	Filtered	Filtered	Filtered	Filtered	Filtered	Filtered	Filtered	Filtered	Filtered	Filtered	Filtered	Filtered	Filtered	Filtered	Filtered	Filtered	Filtered	Filtered	Filtered	3625.39	24184.8	15310.8	27988.6	74112	37269.5	12961.6	Filtered	Filtered
A0A0D3B3E5	508670	413521	476290	505996	309378	323332	250844	185432	73565.6	118053	150931	160220	139607	137029	155563	169135	174853	155989	186996	197658	149929	163746	190729	190981	158866	147081	140069	226873	108296	161520	116272	166278	139514	116178	159234	188515	153145	144766	103339	142262	355107	368614	262160	251473	222538	223769	272811	262159	308930
A0A0D3B3F4;A0A0D3EB68	Filtered	Filtered	Filtered	Filtered	Filtered	Filtered	Filtered	Filtered	Filtered	15229.9	Filtered	44149.8	Filtered	77005.5	70369.6	81998.1	40966.6	Filtered	Filtered	Filtered	45916.8	56331.7	119468	86594.8	Filtered	Filtered	Filtered	Filtered	64590.1	Filtered	Filtered	78966.4	Filtered	74040.3	50210.4	Filtered	80676.5	55074.2	91483.6	65804	Filtered	Filtered	Filtered	Filtered	209471	102760	168206	Filtered	18945.8
A0A0D3B3F9;A0A0D3EB42	Filtered	43028.8	48189.9	Filtered	Filtered	432283	Filtered	Filtered	312027	178110	Filtered	3148.37	17617.2	17049	2783.37	Filtered	7524.39	3377.86	1972.72	9137.94	5933.28	Filtered	Filtered	19760.2	34683.2	11711.4	11847.4	16737.3	17701.2	17927.6	199303	12768.4	55262.5	59013.8	10384.6	28508.5	42204.2	85774.4	25241.5	15720.7	23220.7	34599.8	22968.7	61429.8	34892.8	204824	22389.1	Filtered	4432.87
A0A0D3B3H6;A0A0D3EB17	Filtered	70964.2	1.1385	Filtered	Filtered	Filtered	Filtered	Filtered	Filtered	1	1	1	636.668	Filtered	922.059	Filtered	Filtered	1	1	1	1	38457.9	1	1784.43	103803	1.13732	36632.3	45126.3	52171.7	1.25056	59326.5	Filtered	2784.49	105533	45704	1	39316.1	Filtered	16318	Filtered	Filtered	1	Filtered	Filtered	Filtered	Filtered	Filtered	Filtered	Filtered
A0A0D3B3M3	332045	216864	157070	206684	175082	194163	168722	229456	12037.6	87830.2	122354	75997.7	106800	85949.8	60737.1	81166.4	111467	103157	81353.5	72116.8	46026.7	89473.1	64459.1	115160	125622	49891	161812	122221	84394	93710.4	49058.3	103250	82606.1	153151	109213	97114	90728.5	66427.4	127194	93561.2	287785	153881	272404	266509	434746	266758	313352	473163	149767
A0A0D3B3N4	Filtered	19119.3	43940.3	Filtered	Filtered	Filtered	53435.1	Filtered	42788.2	33697.9	7379.83	30350.1	25783.4	1	33874.2	Filtered	20890.1	52519.9	55240.9	68429.8	23981.7	12449.5	27729.9	18368.2	21513.1	19781.5	1	34702.1	7786.62	9135.29	1	Filtered	Filtered	22018.9	Filtered	51969.3	17942.7	1	Filtered	Filtered	59901.5	48256.3	22067.7	11357.5	Filtered	Filtered	Filtered	Filtered	75968.8
A0A0D3B3N9	162428	136491	153408	163156	191634	336370	171600	152381	236874	46333.4	250528	91535.6	92400.5	119632	89001.9	31540.5	25463.7	114910	90099.8	12353.1	19431.3	92963.6	96911.3	110158	120606	85309	89538	104431	69186.5	58480.8	56215.3	125743	192269	110020	118444	53380.3	133649	19217.3	14280.7	61187.1	151744	124459	162721	217794	297372	194933	180336	257964	163822
A0A0D3B3R3	451259	133182	468826	286447	548204	463467	592771	126955	952932	241508	433388	480709	404111	776215	438253	515919	283635	414112	303294	405828	400990	354897	359483	290161	325159	455119	266192	640481	286827	707361	269250	262684	839341	139662	437990	300402	302876	233963	201452	383077	199040	273362	93339.4	Filtered	223867	93711.8	185387	289695	159027
A0A0D3B3S7	122514	91540.5	119688	144120	144883	290781	72053.2	131898	73103.1	25734.3	41348.8	27201.2	17613.3	49398.5	24750.5	32957.1	58351.3	25729.3	10965.7	22875.9	14630.6	41554	21347.4	32214.9	31403.9	52630.2	25941.6	30131.9	31863.3	45649.7	47785	37346.6	26519.2	31783.7	28501.8	28982	32358.6	12299.9	42792.7	20439.7	106658	146207	204874	179446	152929	152239	82669.9	153983	38041.7
A0A0D3B3T4	3.17741e+06	2.67522e+06	3.45955e+06	2821059	3.82997e+06	4.03259e+06	3.26449e+06	3425390	2.25594e+06	1.54194e+06	1.72369e+06	1.91552e+06	2.06053e+06	1.49562e+06	1.82808e+06	1.58235e+06	1.38714e+06	1339643	1.36392e+06	1.75489e+06	1.40449e+06	1.3553e+06	1.48761e+06	1731630	1614026	1.0891e+06	1.39148e+06	1656913	1.24166e+06	1.38101e+06	1.19358e+06	1678995	1.47865e+06	1.33364e+06	1.75006e+06	2.1626e+06	1.86188e+06	1.66946e+06	1546671	2084399	3332804	2170433	1487198	1.99311e+06	1.97866e+06	2.28628e+06	2.59589e+06	2803349	2.04634e+06
A0A0D3B3T7	Filtered	Filtered	1	Filtered	1	Filtered	Filtered	Filtered	Filtered	Filtered	Filtered	Filtered	Filtered	Filtered	Filtered	Filtered	Filtered	7519.62	13348	12936.8	Filtered	4391.07	Filtered	Filtered	Filtered	5088.38	Filtered	Filtered	Filtered	1	1	Filtered	21004.2	Filtered	Filtered	7878.07	2348.96	Filtered	983.199	Filtered	Filtered	Filtered	Filtered	Filtered	Filtered	Filtered	Filtered	Filtered	7665.83
A0A0D3B3X9	169099	92459.8	62061.9	106476	148387	149690	179621	173629	622480	81282.5	266374	126764	118853	300307	103447	170208	97639.6	66579.9	34493.4	57116.2	61414	133823	128380	102994	191555	104720	156304	139851	201091	91609.4	159460	168658	101145	158414	157375	103012	182375	205932	121545	142857	143164	301254	131295	266567	197917	198663	155140	196166	118659
A0A0D3B3Y5	2.19306e+06	2455099	1.84877e+06	1.69433e+06	2.18852e+06	2.1014e+06	1.75013e+06	1.78804e+06	1.70442e+06	1.74745e+06	1.22535e+06	1.57157e+06	1.7175e+06	1.3031e+06	1.41403e+06	1430064	1.52827e+06	1.48846e+06	2093186	2.18336e+06	1.98069e+06	1.63353e+06	1816340	1.77017e+06	1.29433e+06	1541020	1.27015e+06	1.8933e+06	995764	1.71888e+06	1.25261e+06	1425644	1.39766e+06	1.44118e+06	1.58382e+06	2.54285e+06	2000507	1.7593e+06	1.34538e+06	2.02842e+06	3.09171e+06	2.39499e+06	1.25522e+06	1.49575e+06	1682981	1.96899e+06	1963537	2.05882e+06	2.46134e+06
A0A0D3B3Y6	Filtered	Filtered	1	Filtered	Filtered	Filtered	Filtered	1.04935	27931.2	7131.26	Filtered	1	Filtered	161926	562.396	2375.69	1	Filtered	20659.7	673.48	19732.6	1316.34	1	1337.79	13870.4	35025.9	1	1	1916.58	151.673	44090.7	6506.92	12939.8	Filtered	976.55	19923.1	531.881	Filtered	83114.8	92.6748	1.1391	19986.3	Filtered	1	Filtered	Filtered	Filtered	Filtered	73231.5
A0A0D3B3Z0	2.63741e+06	3.15959e+06	1.58004e+06	2694650	2.80298e+06	2.63152e+06	3.1225e+06	3077878	16934722	10268880	10686207	8979885	10789135	16694671	4924201	15422466	5096088	5936610	5714018	5909224	5.92618e+06	8.08e+06	6.70063e+06	6055632	10119955	7.50509e+06	6.91753e+06	7.6083e+06	9528011	8991147	7688796	9250026	1.07654e+06	2.83706e+06	2.59051e+06	2.2965e+06	2827641	2.46096e+06	2592999	5.13707e+06	3.56045e+06	2751864	5.40743e+06	4002805	3.58197e+06	4.32028e+06	4.48017e+06	3814752	3.10233e+06
A0A0D3B406	302831	263313	155788	400752	321271	150607	191430	172423	111414	171837	108656	86133.9	223252	31943	80784.6	89602.4	78165.1	136170	155691	150963	81123.2	106571	70076.6	192179	153129	110855	171962	72585.3	99631.9	100242	40438.6	67188	133784	169295	139000	157716	98389.2	85832.8	153098	141446	123714	134951	156652	187112	220088	77139.2	197042	548471	88016.2
A0A0D3B407	16562.6	29623.1	Filtered	42327.9	Filtered	Filtered	Filtered	Filtered	Filtered	10990.8	1	Filtered	Filtered	Filtered	Filtered	Filtered	9151.95	6886.57	21542.6	8142.95	14239.9	16179	Filtered	2601.92	8614.73	26570.7	32372.7	11702	9503.65	1630.34	30582.4	Filtered	17152.7	23105.7	Filtered	5785.1	8769.94	Filtered	Filtered	Filtered	4373.39	18474.9	18847.1	30489.9	2759.03	19466.4	11698.3	9792.77	7150.56
A0A0D3B420	311604	179160	292067	209949	394906	492415	372958	204161	555959	277435	175268	195106	171998	160595	211317	114357	335284	326274	414034	465005	367103	191980	242248	336315	266325	304235	280907	239318	158313	283456	278060	124611	358696	152205	168376	235165	185890	110808	83927.1	138186	313690	220818	229515	219787	238963	166211	265056	219359	237599
A0A0D3B429	Filtered	93646.7	18518.8	Filtered	16376.3	Filtered	Filtered	42996.3	27618.1	45209.8	40902.6	49232.2	48993.7	72334.5	61886.5	101364	34878.3	30091	32396.2	29567.8	19704.3	10498.1	27693.8	19744.3	19120.9	26415.5	16713.8	41609	29221.5	34932.4	10361.4	24714.2	22090.4	24231.2	48495.8	46412.4	22048.5	37930.4	45563.9	52260.1	40909.2	37165.1	83406.9	92225.3	4275.26	90275.9	32674.7	6871.32	14865.1
A0A0D3B431	Filtered	16767.5	Filtered	11954.7	Filtered	37427.5	Filtered	1	379084	30637.9	36041.9	34073.9	9521.16	20523.6	13450.6	19113.1	31685.3	20525.3	39944.8	32118.5	54469	20289.5	22732.5	29304	37187	27447.1	Filtered	39645.5	38902.8	13382.1	5610.94	25162.3	55410	51753.7	Filtered	33541.2	72530.6	49169.6	36285.8	15273.9	11776.6	28669.5	38553.2	15890.8	55931.6	45126.9	11416.5	42974.1	15719.3
A0A0D3B444;A0A0D3C2Y7;A0A0D3C883	29698.9	30601.2	1554.67	9269.95	Filtered	Filtered	Filtered	23196.3	Filtered	10343.9	8442.23	22190.3	19078.5	8906.89	12521.1	38557.9	23730	22878.2	10303	13865.5	2916.88	26754.5	24636.6	25978.3	35178.4	21217.4	32638.6	19679.5	21321.2	22228.1	13768	13941.2	12599.4	19695.9	29294.4	11071.7	27836.6	28506	28946	28231.4	29607	7315.74	37555.1	7940.48	51851.9	Filtered	46615.5	44984.2	8362.2
A0A0D3B450	287509	246998	275327	322311	262228	302260	234917	231088	265912	106794	189926	162035	149702	247657	152946	164903	260028	211359	206030	231059	205353	310011	264063	290329	291953	263714	279760	145999	320588	223678	287576	369261	147577	161040	261056	121077	165625	238799	212875	295307	165917	160111	192759	283697	280815	147370	199437	272286	89241.5
A0A0D3B461;A0A0D3BTL0;A0A0D3C308	168101	119743	136827	130602	98323.9	222612	125959	177751	202732	131221	133974	128511	137821	110500	127849	135773	79161.4	106972	145894	101204	142070	127537	113320	97899.1	102640	90449.7	105805	98561.1	100853	105659	100408	86607.7	51799.5	30267.8	66152.5	76695.8	65185.8	44518.5	31267.9	56885.1	144210	115499	78827.1	114183	97756.7	126165	131191	138552	166408
A0A0D3B498	631878	674389	487997	522381	947146	406105	612346	608908	142023	341085	340961	387214	402226	425036	406009	359834	332451	277865	399166	406189	316262	285739	395178	277120	266045	222481	229263	310632	267572	289220	264872	330050	350246	308173	375542	403950	288494	391683	286024	505839	578183	319795	376315	302445	447514	443431	653893	627102	265459
A0A0D3B4A5	Filtered	Filtered	54009.8	Filtered	Filtered	Filtered	Filtered	Filtered	132927	133063	14215.8	50295.4	19229.4	Filtered	12441.6	13836	5939.07	15951.9	23229.9	Filtered	28872.5	8170.99	Filtered	Filtered	1581.88	11868.5	17041.2	Filtered	Filtered	12754.4	21183.9	Filtered	21092.4	Filtered	4367.37	31907.8	Filtered	Filtered	3217.95	Filtered	58442.4	60366.5	50120.9	Filtered	37312.8	Filtered	25124.6	Filtered	Filtered
A0A0D3B4B4	382232	438675	587359	422452	677188	597303	778014	306874	289003	358547	347856	374954	457633	245292	358553	257540	311208	349694	405718	404992	317322	208356	258065	313731	294436	291501	262049	273162	210257	325045	220698	200934	343875	210544	333180	537124	206929	225773	259974	277925	771688	683857	287665	374216	351637	125910	393044	598783	391038
A0A0D3B4C4	1387386	995311	614252	1.32258e+06	882028	1.14726e+06	554654	1.54915e+06	282125	524625	1.1863e+06	512846	531338	1.03243e+06	431891	882797	800759	506740	422255	506685	403884	900630	837328	941600	1195778	589510	845390	648365	954575	459999	857966	1.03998e+06	483832	1.17256e+06	830484	481351	1.1995e+06	1.39903e+06	1.18405e+06	1.18256e+06	942816	590078	952241	1.27561e+06	1.38225e+06	1.33028e+06	1329179	1657920	764374
A0A0D3B4C9	550893	285149	294850	348119	446816	348071	853000	357955	26342.3	37513.7	35357.4	88206.7	46446.1	373026	58872	91944.9	57581.7	31350.5	22708.4	27049	22084.3	47958.5	51540.4	43456.1	40670.4	34196	38208.4	103813	74094.3	73620.3	6811.93	68909.2	3803.74	4371.57	74546.2	8072.9	22704.4	365.128	3921.63	27297.9	143321	31902	44488.8	50741.4	130436	99269	117288	299452	21785.9
A0A0D3B4F1;A0A0D3B4F7	Filtered	1	1	1.34031	Filtered	223506	1	1	19406.7	71095.7	1	1	4937.4	1	7485.6	1.04441	1	6459.05	564.691	1	1	1	2270.33	1	1.00072	1	1.32988	5293.11	1	815.507	7584.68	1.52754	2480.6	1.08155	1	1	4750.32	1	1	Filtered	1.34583	1	1.09536	149.435	47906.7	1.08429	1.41141	Filtered	711.769
A0A0D3B4I1	811796	528250	514499	735145	637320	795338	527670	645206	217545	210064	413528	276024	244059	417136	216437	199756	252246	277261	226601	259459	193427	278567	266275	279183	290528	307314	315090	261124	288385	324471	324846	343965	150158	180719	212191	141195	251511	260273	207533	1.28232e+06	398392	312963	416184	445669	618649	275496	342067	426797	236143
A0A0D3B4J9;A0A0D3BSQ4;A0A0D3C3S1	Filtered	21356.1	Filtered	Filtered	Filtered	Filtered	Filtered	1	Filtered	32323.2	Filtered	32150.2	42638.7	Filtered	Filtered	97265.3	28675.9	25737	41881.9	25651.3	25791.1	41131.3	12951.8	25577.7	50980.4	22394.1	35749.6	13546	18366.7	16904.4	25200.1	Filtered	31938.6	22572.9	Filtered	45134.5	42244.6	10359.9	28378.7	47614.6	Filtered	Filtered	Filtered	15345	25602.6	Filtered	Filtered	Filtered	32641.6
A0A0D3B4K1	190183	174529	137335	140970	241818	113963	172537	153639	461044	109936	168455	131656	122577	178610	90569.2	163961	161976	120689	74239.6	147658	106110	145959	134512	137634	74506.1	75893.4	60335.1	52754.2	108275	92037.1	102840	153552	168038	120275	135433	106402	171731	152444	164340	112270	137324	40349.6	87255.8	121901	111849	98722.6	148588	148744	73516.3
A0A0D3B4N6;A0A0D3BSQ7;A0A0D3C7L7;A0A0D3DIW7;A0A0D3DYZ3	Filtered	9646	60763.2	73956.2	30509.2	Filtered	Filtered	61054.2	Filtered	31810.9	Filtered	16288	14886.7	4420.21	20921.4	24697.9	11029.5	19646.5	19515.3	17195.5	26901.3	11966.5	4403.65	20946.3	Filtered	Filtered	9389.27	Filtered	15174	14313.7	Filtered	9642.74	16570.3	5163.67	4064.24	39245.5	12035.6	4924.4	7142.15	2937.14	27051.5	57052.8	44858.1	48248.2	19556	28051.2	33256.8	12678.8	41110.7
A0A0D3B4N7	94348	61995.8	59614.7	79280.5	94755	Filtered	89553	58232.1	11580.6	56740.2	63876.6	65039.1	50936.2	34128.2	75399.2	20847.7	48799.2	57917	69316.7	61392.2	113362	39144.4	45711.1	58335.7	14382.9	40685.7	56798.5	71646.2	21873	95205	22477.9	21389	72500.2	61759.7	51543.9	118940	72286	9797.29	38546.4	20230.5	45913.2	78319.9	59451.1	16324.1	19287.7	40237.9	39180.8	Filtered	69205.8
A0A0D3B4P2	59309.2	58456	Filtered	20001.9	Filtered	Filtered	38943.1	Filtered	Filtered	51578.8	38915.6	70082.6	50486.8	Filtered	49824.3	Filtered	79660.4	20481.4	84985.3	69348.1	72891.9	65710	80946.4	49021.7	67941.2	23853.5	30750	45354.4	Filtered	21874	25948.1	35793.1	46993.5	49845.5	55034.1	76822.4	40650.4	44949.7	29618.2	25749.6	Filtered	Filtered	61950.7	Filtered	Filtered	Filtered	Filtered	Filtered	92652.2
A0A0D3B4Q2;A0A0D3BSF5	229460	126520	126126	197054	90420	103413	111611	488658	174609	252487	249890	261040	218822	445092	131587	203708	213350	151377	390201	207023	121867	210256	184205	192114	341362	247357	349721	365864	266565	234932	242119	387426	244204	320273	374914	141058	167031	238850	233702	369162	206045	235158	203699	133747	98482.6	178590	268631	25516.6	189055
A0A0D3B4Q4;A0A0D3BRW0;A0A0D3BSF4;A0A0D3C3X8;A0A0D3C496;A0A0D3D481	1.31604e+06	462689	444504	636097	846265	825241	694214	800459	502183	Filtered	309131	162669	205682	413342	199338	276086	425928	245758	233836	253776	190486	321906	242722	423175	567574	343037	428862	420994	300366	230517	427464	538069	418019	663859	430939	343484	693100	497147	492612	671962	703915	625313	599686	664343	848710	844660	866794	1.47751e+06	450492
A0A0D3B4R9	1.35371e+06	445398	229104	462891	956829	1.5968e+06	227260	1.73901e+06	645957	247338	490012	348590	458220	1.13636e+06	364365	954568	401362	205029	285681	234908	308597	513765	519088	402263	741170	304510	489614	620246	1.27677e+06	549984	1.20232e+06	614292	101986	652722	333819	180596	832282	791110	679798	930800	464516	291261	265719	403273	1.19112e+06	881535	693948	769934	343268
A0A0D3B4S7	99195.9	279332	91844.5	69751.6	44494.8	Filtered	93674.7	108050	51110.5	83882.5	62512.9	33281.9	35854.5	45919.8	46475.3	52899.3	19180.5	18176.4	13658.1	2660.09	27017.2	28525.2	31302.9	27726.9	34374.4	33158.6	15127.9	7343.92	22259.7	14505.3	45962.4	93074.8	14248.5	68382	71279.2	70357.7	59839.5	110067	81423.6	108065	123531	119706	155831	134585	104216	137205	69893.5	75634	57851
A0A0D3B4U6;A0A0D3BS62	76538.9	56072.6	424648	23170.5	88738.9	2.97117e+06	37049.7	120530	3.29544e+06	838542	49359	57159.5	82781.6	30107.8	87920	109669	63101	61317.8	138395	58052.3	116110	71065.3	72370.5	93261.2	48188.7	45964.5	36698.1	55163.8	88699	250039	1.33533e+06	96368.9	124444	137729	55506.3	75872.2	164432	26359.9	109232	64399.3	102974	151431	153908	145328	133059	214026	135893	153410	214524
A0A0D3B4V3	36274.2	14072.5	13030.9	19699.5	22587.2	16291.8	Filtered	26709	61624.7	22677.5	Filtered	12910.4	Filtered	Filtered	9933.05	16963.4	23412.2	4532.4	Filtered	15767.2	10210.5	25080	46683.6	25534.1	Filtered	Filtered	Filtered	2660.14	34277.7	1	Filtered	22064.6	1	34884.5	16245.3	13221.7	13866.4	31803.7	30134.5	Filtered	26262.7	12125.7	31128	15889.5	26711.7	40392.6	25243.2	27944.6	22770.2
A0A0D3B4Y6	194061	165932	105853	219422	160936	128629	162342	234131	46837.2	52016.9	117289	87896.9	46352.5	30976.1	51385.7	88716	72997	71502.2	51997.3	31703.2	58091.4	116938	42529.1	89202.8	77585.9	102361	112157	109616	59882.1	88089	73881.4	98342	68876.2	106321	76227.6	71825	44248	156857	114572	91524.6	116913	73590	106207	186537	200696	168434	146063	313881	57486.7
A0A0D3B4Z1	88502.9	116190	48337.1	93894.7	14687.8	13209.6	115898	86868.5	95831.7	50157.4	127539	50207.4	37880.8	64135.9	43735.9	72211.3	61514.4	33246.5	31435.6	41116.6	34998.3	57069.3	45434.7	55555	58440.4	49783.1	59371	67405.8	53301.4	36020.5	63050.4	91105.9	103583	100061	88737.6	99005.1	122445	72395.5	108558	108814	9645.81	43485.3	60557.3	112394	70159.4	66062.2	177711	83149.4	95958.1
A0A0D3B4Z3;A0A0D3BRX4;A0A0D3C492	Filtered	102027	Filtered	251569	Filtered	113438	111431	200098	Filtered	Filtered	Filtered	40030.6	40854.1	48359.1	Filtered	26268.2	Filtered	52889.8	29646	43181	21076.3	41749.8	26021.4	38859.7	15156.3	Filtered	37160	93580	44009.9	62075.1	62080.5	58891.3	31248.8	78983.3	72517.9	39678.8	78370.1	55054.8	105304	72997	148775	117877	122394	153888	204297	102918	185884	188274	33195.2
A0A0D3B533	194683	169841	122918	178374	181090	90484.2	117836	188591	169221	105391	216358	121089	156530	290645	113484	195133	Filtered	11287.7	Filtered	Filtered	5161.88	36934.8	58512.9	35421.9	39712.8	Filtered	42777.4	35939.7	33405.4	Filtered	Filtered	61884.1	27321.4	94519.1	74293.2	23936	123060	60849.9	113943	35892.4	96611.1	47015.6	112919	170363	262677	182711	278155	336742	Filtered
A0A0D3B541	15620.1	19105.8	10501.7	12350.2	16933.1	Filtered	1	9905.27	Filtered	Filtered	Filtered	Filtered	Filtered	Filtered	Filtered	Filtered	4462.3	2964.89	4720.7	3762.43	2133.93	1818.37	6332.79	4918.2	Filtered	4454.11	296.702	1833.71	Filtered	2573.63	3949.55	Filtered	Filtered	Filtered	Filtered	Filtered	Filtered	Filtered	Filtered	Filtered	Filtered	1	Filtered	5758.04	Filtered	8827.63	3715.19	Filtered	4365.72
A0A0D3B544	2.92102e+06	1.10629e+06	914942	1.15618e+06	1.14873e+06	2.33125e+06	723288	2.35945e+06	1.7895e+06	345564	1.19894e+06	318196	385072	1.24196e+06	465228	587699	652250	326532	470188	408455	294251	744907	607351	747654	1.14191e+06	802515	1140714	713182	808601	635703	1.01943e+06	1.09293e+06	1.17725e+06	940234	710400	564802	940748	1.26963e+06	916663	1.0477e+06	1.47103e+06	1.57766e+06	1794087	2.48456e+06	2.08751e+06	4440059	2325400	1901680	1.0612e+06
A0A0D3B598;A0A0D3BRH5;A0A0D3DSN8	1.12542e+06	1682.47	752463	794310	695884	Filtered	678046	1.57956e+06	612298	790162	834849	101121	329010	801515	322266	308208	39742.4	318346	211892	586615	281434	75049.3	103892	586659	35551.4	380526	761197	675948	544835	348904	559715	878448	515078	696574	334027	22786.3	230561	826957	819160	969036	1.80681e+06	1.07871e+06	2343645	Filtered	970336	Filtered	1.2873e+06	2036819	573429
A0A0D3B5C4	Filtered	32339.8	Filtered	Filtered	Filtered	Filtered	Filtered	36402.4	108065	66705.8	75711	57237.7	67623.4	95411.6	41766.2	70928.6	41051.8	43673.1	57755.3	41443	17787.8	61253.1	51487.9	63066.6	46685.1	Filtered	38621.2	68478.6	119916	35876.5	82165.9	49851.4	29942.3	72445.1	50126.4	56072.5	77849.2	67990.4	58355.2	68811.7	Filtered	Filtered	Filtered	28381.8	34707.9	Filtered	Filtered	22362.7	67684.7
A0A0D3B5D5	2.60683e+06	2.58318e+06	1.507e+06	2.77892e+06	2.08816e+06	568276	1.83882e+06	2.34897e+06	5.79726e+06	1.67048e+06	3.70563e+06	993681	1.72908e+06	3.17948e+06	110079	2.85368e+06	1.48574e+06	1.14529e+06	1.26011e+06	1.13065e+06	1.11811e+06	1.67339e+06	1.35087e+06	1584611	2.60346e+06	1.55747e+06	2035901	1.7705e+06	1721986	1.09976e+06	1.83222e+06	1.35157e+06	4.07829e+06	2712733	3.36769e+06	3257279	5.47607e+06	4.15161e+06	2423201	4.07488e+06	1.97225e+06	1.41924e+06	2.68798e+06	3480852	3.12283e+06	3.15108e+06	3.06235e+06	3.11636e+06	2.75346e+06
A0A0D3B5D7	189470	259999	181091	151444	311939	398148	200677	143175	147828	43957.6	119183	121391	72582.1	52412.2	125433	80537.2	87942.4	112531	55704.8	63088.6	56218.9	44401.4	45307.4	54210	89888.3	100367	89341.2	135504	42426.4	60206.4	55528.2	92346.1	173461	78998.9	62240.8	76707.7	40282.3	47476.9	123068	116347	217603	213555	49000.9	154385	80680.1	49494.8	85967	128827	68591.3
A0A0D3B5F4	47893.5	91017.2	32218.2	57765	43481.1	11437.6	Filtered	31756.8	42024.4	49263.1	43932.3	39072.1	40362	25844.1	30750	28616.6	36119.2	29843.4	33078.9	28618.4	36823	29869	43656.9	47874.8	38852.9	36607.1	50944.5	28345.3	28436.4	22011.5	35370.6	34904.3	28644	63712.5	77460.4	36591.5	58607	58590	37245.3	32207.2	Filtered	Filtered	Filtered	122168	68182.8	77393.7	21803.2	38282.2	23558.2
A0A0D3B5F9;A0A0D3BR62;A0A0D3C4U2;A0A0D3CTP2;A0A0D3DSV1	237126	250870	540942	332539	757049	693195	601965	420163	501753	967543	553874	949320	1031542	591336	971758	381351	462267	1.00022e+06	843712	1.16885e+06	1.11399e+06	415142	607403	501385	313457	832174	405959	937853	364509	1.01888e+06	352968	491211	709660	329424	420957	903318	356504	459309	406542	464792	519056	568677	172753	386408	354339	254901	166050	347327	459841
A0A0D3B5I0	71360.7	56723.4	33834.3	71188	Filtered	Filtered	38813.4	75551.4	134889	102308	131676	109179	124424	81407.8	115381	126806	117837	110322	112753	162777	121145	118469	123780	153823	112731	105293	118802	142402	68880	93985.8	99804.7	133796	136993	175825	143361	165275	175165	164054	154669	161807	53591.1	42809.6	23672.7	Filtered	25189.4	58829.7	69252.4	73017.7	111769
A0A0D3B5I8	1015105	747003	814021	914276	1.0098e+06	1.00741e+06	932119	638904	455548	467362	766296	551070	720080	742292	587972	480841	790598	648140	854718	1.04954e+06	622488	657702	585108	874251	687107	742260	928234	879881	640869	808451	613438	437397	812127	811909	666728	899321	678302	735472	820228	863902	940487	794393	534284	706780	686018	687389	744465	1.21774e+06	931214
A0A0D3B5K6	224578	160015	38646.1	208008	206523	Filtered	200482	150211	168024	57200.5	120177	80716.2	87722.8	Filtered	84390.6	121970	208280	58629	78962.3	62768.3	89405.6	109347	89919.4	97835.6	100136	122780	106802	36703.2	63049.6	59709.2	115041	61932	100419	140432	98286.5	103173	132666	108670	97311.9	69282	105174	123016	146377	125488	116692	148705	107036	87950.2	125253
A0A0D3B5Q2	130433	77124.7	60306.2	202075	Filtered	137416	Filtered	Filtered	Filtered	80526.8	87337.3	44654.7	125031	191422	104654	42457.4	105884	124951	87458.9	103529	25843.3	125225	130199	128730	136243	123881	142893	141323	95147.4	197824	226119	80658	111548	159390	316780	112670	139741	216414	253912	175564	92057.8	42981	43632.8	87247.6	123769	83202.8	154953	252637	105585
A0A0D3B5T4	29463.4	72114.3	85497.1	66785.2	28741.6	116507	136918	69707.1	66551.7	71169.5	95412.9	44795.4	86613	61090.3	54095.1	48208.5	42059.8	58476	34314.9	27914.5	21242.8	49561.3	36214.1	29614	74365.6	53192.2	71757.8	55652.9	44604	55623.5	66009.5	40960.5	57995.2	67311	42714	61219.8	29360	70001.1	72638.6	46833.7	62501.6	66220.7	56029.5	50515.2	89236.5	71807	60293.6	45982.2	50773.8
A0A0D3B5T5	34498	Filtered	Filtered	13096.8	34700.2	Filtered	Filtered	71343.9	25837.9	53102.6	31270.7	82202	103469	119591	41851.9	122765	39397.5	10430.6	18048.5	16736	Filtered	37993.1	18638.3	39250.6	63412.1	29261.7	Filtered	7947.69	27361.2	19225.6	25224.9	40703.9	11071.4	48311.7	Filtered	Filtered	49540.6	31205.2	53128	49080.1	115535	61770.1	102124	113801	240466	179983	132875	190755	47569.9
A0A0D3B5U7	10937.3	Filtered	6201.25	13118.9	10545.6	Filtered	Filtered	20634.1	22830.8	8153.76	14096	5313.42	7256.3	13153.7	8023.25	9343.58	6842.13	8163.1	5029.41	6451.6	3654.07	9321.34	9531.11	7633.79	10121.9	8306.27	9908.75	14358.3	9876.18	7708.56	9017.22	4640.9	10741.1	13705.2	9544.62	11193.6	13422.6	20052.1	14139.1	11711.5	19581.2	16102	22771.9	21511.1	29063	23453.3	27865.4	28233.2	10786.3
A0A0D3B5W7	10521195	3.64368e+06	6530457	7344742	8502703	11784460	4.72821e+06	5007732	11364413	2.50058e+06	1.83934e+06	1551316	2.45766e+06	2082610	2.63805e+06	1.94971e+06	2.24078e+06	2947749	2.24793e+06	2.79477e+06	3.36814e+06	2.40752e+06	2.38748e+06	2.4984e+06	1.84486e+06	2205948	2.81155e+06	2060185	1.34592e+06	4.13691e+06	3774628	1.82403e+06	4.0223e+06	2.4454e+06	3250929	2252853	2.94927e+06	2586211	2.59663e+06	2.71702e+06	3391217	3.86318e+06	3.61789e+06	3.55267e+06	4963791	4.31438e+06	5.63357e+06	5526370	2.3727e+06
A0A0D3B5Y0;A0A0D3BQF0	Filtered	36853.4	33970.2	62804.9	Filtered	Filtered	Filtered	41643.8	4233.52	7678.76	12277.7	15584	15396.8	Filtered	17981.8	33918.3	24325.2	12557	9574.56	9903.1	4094.83	23506.5	16393.2	3433.71	17223.1	4121.63	11742.5	15984.6	13656	21536	3790.59	25124.8	3847.33	6844.25	29435.2	1110.63	2662.05	8019.84	14021.6	23967.9	50668.3	60918.1	76663.9	85248.7	37766	35040.2	41524.3	45764.5	Filtered
A0A0D3B5Z1	Filtered	Filtered	Filtered	Filtered	Filtered	Filtered	1	Filtered	Filtered	Filtered	Filtered	Filtered	Filtered	23066.3	Filtered	Filtered	Filtered	Filtered	Filtered	Filtered	Filtered	Filtered	Filtered	Filtered	Filtered	Filtered	Filtered	Filtered	Filtered	Filtered	1	Filtered	Filtered	Filtered	Filtered	Filtered	1	Filtered	Filtered	Filtered	Filtered	Filtered	Filtered	Filtered	Filtered	Filtered	Filtered	1	Filtered
A0A0D3B696	33153.2	31119.1	12213.3	13884.7	Filtered	Filtered	Filtered	38647.5	54649.4	11740.8	26503.9	13933.5	5566.6	Filtered	10449.6	12660.3	13011.4	7130.21	7168.52	10632.7	1485.73	9929.56	12096.6	10786.7	13341.3	7775.67	12715.2	2647.07	9574.1	1697.1	11066.2	Filtered	21493.7	11673.1	7942.7	9095.2	16353.4	19348	9558.56	12304.6	11283.6	13394.3	20707.1	15786	29433	19701.4	25068.9	Filtered	14961
A0A0D3B6A3	452624	386767	321316	540290	423212	196984	414589	459045	107686	134342	316265	209679	274056	263924	208671	238849	247036	222052	177597	220466	207893	235248	245655	265785	271050	198360	285669	238560	188128	231891	207002	251025	217840	306928	286010	190248	237980	281368	294199	296537	420377	357189	412144	432431	593492	234527	605990	798207	282642
A0A0D3B6A6	9587.21	9626.43	19201.6	17431.9	56472.8	91555	100048	12509.1	122537	147011	17346.5	33325.4	9464.95	61561.7	79685.5	27752.1	49697.9	33439.6	78686	54468.8	104239	36868.3	21222.3	12444.4	12450	41600.4	18259.6	25305.4	13256.1	27466.2	91548.6	10877.2	32345.8	10263.4	28146.4	75787.6	10015.2	21586.3	6774.53	24283.5	44343.8	27839.6	13988.8	10629.9	19716.1	11608.9	15736	7834.16	80273.5
A0A0D3B6D5	Filtered	153333	1	1	146544	72359.6	104815	147798	265342	82585	235376	59257.8	56363.9	268006	69451.7	81603.1	397056	71331	178787	226044	433762	121404	458983	191475	112850	111860	206730	94200.2	118270	204904	91720.8	268725	85938.2	223298	111950	188949	209146	114289	86143.6	251308	Filtered	Filtered	82201.4	Filtered	Filtered	7499.41	148709	Filtered	211786
A0A0D3B6D7	606759	62735.8	395756	157816	557630	607903	189805	168882	1231990	157191	162119	330503	214986	595461	569974	290482	422186	248433	399861	220937	690564	290978	763964	214455	154919	288102	151003	137632	275333	333425	152713	212921	328234	128791	279317	212513	112076	96556.9	227238	149875	44178.2	Filtered	Filtered	291.178	158296	Filtered	1638.54	261750	90021.6
A0A0D3B6F7	391216	193898	940739	338166	905067	646942	738443	104829	364254	677672	264843	657469	728348	301088	845656	355262	432799	883141	1.08073e+06	1.24629e+06	1101537	438639	550910	468881	293761	716903	375369	729270	189498	981868	436366	431270	685940	285768	363544	960807	422994	390637	253560	416888	695817	659893	647554	330579	194079	441661	318666	204663	739721
A0A0D3B6G1	Filtered	79505.8	129707	115256	126360	103084	166348	140517	127660	73486.6	163597	80963.5	64204	79995.6	64643.1	83393.8	65436.4	39080.9	49846.3	38268.5	32749.8	85245.4	24514.5	37316.7	84606.5	83662	106709	72321.3	66931.8	66885.4	63300	14723	156991	113122	84939.4	97875.9	129749	162818	103442	120146	156683	90736.5	117816	180267	170245	140102	214114	228994	84615.9
A0A0D3B6I0;A0A0D3BPJ3	Filtered	Filtered	Filtered	Filtered	Filtered	Filtered	Filtered	Filtered	2537.84	2379.25	Filtered	1550.04	Filtered	Filtered	Filtered	Filtered	2656.24	2567.4	7716.48	8479.93	3446.21	3662.64	2072.22	4072.47	2800.78	2942.42	2032.89	Filtered	1605.45	1579.55	1237.07	Filtered	2493.36	2914.09	2422.4	5737.8	3283.09	Filtered	1915.91	1088.33	1494.05	Filtered	1570.5	2671.07	Filtered	Filtered	1227.93	Filtered	4114.14
A0A0D3B6I8	411870	334083	334553	159547	318956	278250	173495	439569	3.73688e+06	335732	763419	506251	560901	986513	602292	800625	507931	484078	443809	591852	611634	683481	610260	585502	774805	598678	575765	304468	760994	656500	512302	739575	818664	468808	748978	464985	942936	683500	533369	712886	349672	353158	384790	462158	676469	528622	669174	787755	604273
A0A0D3B6K3;A0A0D3C643	Filtered	21882.9	39113.1	Filtered	Filtered	Filtered	24510.6	17014.4	Filtered	15964.1	Filtered	20204.4	12757.5	Filtered	27888.6	13500.7	18529.9	20286.9	23755.7	28987.6	34165.6	10350.8	10012.4	10748.4	Filtered	15968.2	7053.47	22119.6	10533.5	22743.8	Filtered	19644.1	14839.7	Filtered	4595.51	23390.6	1443.53	Filtered	4153.67	Filtered	28463.9	32917.8	Filtered	Filtered	Filtered	27632.5	Filtered	Filtered	7939.36
A0A0D3B6P7	284602	183636	301223	148909	320430	87039.2	168743	236614	12523.9	71836.2	94902.1	93507.9	82511	159920	85339.8	117372	97474.1	68556.4	61799.2	79068.8	96597.2	65205.2	92017.9	59792.2	125747	82297.2	50841.5	Filtered	171450	81246.7	95420.6	111293	Filtered	Filtered	Filtered	5848.29	Filtered	Filtered	Filtered	Filtered	234007	265059	150280	211101	327820	256067	321049	560824	50651.7
A0A0D3B6R7	24700.5	26324.6	22199.4	Filtered	15994	Filtered	16186.4	Filtered	64635	10496.2	80920.9	32603.5	20212.8	38377.1	34670.3	33463.6	39072.5	16352.5	31837.8	28130.3	24126.5	18253.2	61716.5	30398.4	16425.7	7706.79	Filtered	1502.63	11468.2	1	9373.56	730.152	14898.4	Filtered	Filtered	4606.56	25121.5	Filtered	Filtered	Filtered	Filtered	21484.8	23057.5	Filtered	58925.1	39780.7	1	18107	Filtered
A0A0D3B6T7	Filtered	128161	77221.1	325679	87736.8	162770	Filtered	158195	323446	184844	75205.2	118972	125855	80490.1	173711	37958.4	72793	152867	183751	118573	134141	77167.8	83155.7	69092.8	146465	221105	161385	115249	125713	190534	151448	61928.8	347657	140068	120314	139171	111072	138165	5552.78	56065.8	56708.1	6679.32	29624.5	75078.8	95542	81729.6	73642.7	163872	122047
A0A0D3B6T9	Filtered	Filtered	Filtered	Filtered	Filtered	Filtered	Filtered	Filtered	Filtered	Filtered	Filtered	Filtered	Filtered	Filtered	1	Filtered	Filtered	Filtered	Filtered	Filtered	Filtered	Filtered	Filtered	Filtered	Filtered	Filtered	Filtered	Filtered	Filtered	Filtered	1	Filtered	1	1157.3	1	Filtered	Filtered	Filtered	1	Filtered	Filtered	Filtered	Filtered	Filtered	Filtered	Filtered	Filtered	Filtered	Filtered
A0A0D3B6U2;A0A0D3C6D0	56612.1	16532.8	15070.5	Filtered	Filtered	Filtered	Filtered	Filtered	3551.17	Filtered	2444.23	1	Filtered	1	1	1	Filtered	1	Filtered	Filtered	1	Filtered	1	1	Filtered	1	Filtered	Filtered	1	Filtered	1506.59	Filtered	1	1	Filtered	Filtered	Filtered	Filtered	Filtered	Filtered	98202	194038	108955	177841	776087	283969	190729	Filtered	Filtered
A0A0D3B6Y1;A0A0D3C6I1	Filtered	Filtered	Filtered	Filtered	Filtered	223086	Filtered	Filtered	175786	74936.6	Filtered	Filtered	Filtered	Filtered	Filtered	Filtered	Filtered	Filtered	Filtered	Filtered	Filtered	1	Filtered	Filtered	Filtered	Filtered	Filtered	Filtered	Filtered	Filtered	135669	Filtered	Filtered	Filtered	Filtered	Filtered	Filtered	Filtered	Filtered	Filtered	Filtered	Filtered	Filtered	Filtered	Filtered	Filtered	Filtered	Filtered	Filtered
A0A0D3B6Y2	Filtered	9412.39	2807.33	11607	Filtered	Filtered	7946.92	10820.2	42997.9	18048.4	52349.9	34679.8	40263.9	47666.7	31778	45387.5	17195.7	10843.9	12148.4	20340.9	4722.18	28487.9	21537.5	31273.9	32877.9	17901.5	22446.6	22420.1	19963.2	15990.5	30401.2	23976.3	17789.7	20083.2	20964.8	8848.3	23786.8	26398.6	37732.2	33756.4	Filtered	Filtered	10200.6	26671.1	Filtered	7973.89	Filtered	24507	21748.8
A0A0D3B727;A0A0D3BWB1	6.1939e+06	6.99044e+06	3868167	4218607	5.74577e+06	5055807	6863827	4668579	9605278	2.70321e+06	2.47085e+06	3.65124e+06	2.0725e+06	2.5979e+06	1.6002e+06	1.44073e+06	6289044	3.62482e+06	5.52309e+06	3548498	6.34733e+06	3396224	4.22604e+06	6893970	1.96788e+06	3.44374e+06	2551370	3.27512e+06	2.71893e+06	1.73801e+06	1.67192e+06	1.65372e+06	3.67862e+06	2959097	3.25739e+06	3614362	3.30762e+06	2506042	3.12105e+06	2.02286e+06	2.62582e+06	2.6571e+06	3455110	8663118	5.76544e+06	5.99776e+06	4585222	4571524	3.30427e+06
A0A0D3B743;A0A0D3C6Q0	13090098	4566291	11350731	8.38621e+06	10213552	10984415	9833810	6.00941e+06	8.20123e+06	4035350	8456251	6371298	5521752	9910858	5.87849e+06	7.47816e+06	6586672	6.42804e+06	6664693	7.99325e+06	6.29534e+06	8253144	7.98814e+06	6889449	8523214	6560322	6.16503e+06	7.07179e+06	7.08803e+06	7762686	5.80769e+06	8.02608e+06	9546419	4463661	8855546	5853413	5835699	6.15781e+06	7.26657e+06	9843275	4366870	6168883	2.94566e+06	4868449	4227791	1810000	4.53317e+06	8.24502e+06	4333800
A0A0D3B746	88177.1	155979	328981	226944	281759	474752	212049	369384	77562.4	76576.4	136325	98032.4	97444.7	203427	123308	123469	278260	210911	224602	225402	175563	166413	210144	234208	141637	266998	145039	276080	152735	223720	151152	275198	202237	177458	180529	208658	159512	197400	226423	108047	238793	437251	299354	318706	303464	287800	234579	217522	111007
A0A0D3B771	Filtered	Filtered	Filtered	Filtered	Filtered	Filtered	Filtered	Filtered	1	1	Filtered	Filtered	Filtered	Filtered	Filtered	Filtered	Filtered	Filtered	Filtered	Filtered	Filtered	Filtered	Filtered	Filtered	Filtered	Filtered	Filtered	Filtered	Filtered	Filtered	10625.3	Filtered	Filtered	1	Filtered	Filtered	Filtered	Filtered	Filtered	Filtered	Filtered	Filtered	Filtered	Filtered	Filtered	Filtered	Filtered	Filtered	Filtered
A0A0D3B783	Filtered	Filtered	Filtered	Filtered	Filtered	Filtered	Filtered	Filtered	29150.4	8003.09	18548.8	3653.17	Filtered	3157.2	Filtered	4205.62	3429.66	2104.98	5401.37	2677.75	2723.82	1709.27	2137.94	Filtered	2938.65	903.704	Filtered	4414.06	1	Filtered	185.263	Filtered	9189.86	Filtered	Filtered	1044.29	548.228	Filtered	Filtered	1	Filtered	Filtered	Filtered	Filtered	Filtered	Filtered	Filtered	Filtered	Filtered
A0A0D3B7B3	1.44605e+06	1.24971e+06	1.00787e+06	933499	2.03658e+06	1.96121e+06	1.43428e+06	1.03334e+06	4.06869e+06	844714	987890	880694	841726	1.67572e+06	841095	743888	973564	835257	1.3578e+06	1.47197e+06	1.16686e+06	984218	862025	1.02577e+06	942684	830384	918975	974933	687550	825186	1.0155e+06	716119	1.09228e+06	1.18554e+06	1.30122e+06	1.40082e+06	1.19588e+06	1.15442e+06	708836	912740	1.15661e+06	1.22722e+06	1.26503e+06	1.31429e+06	997581	1.99148e+06	1.01972e+06	985690	1.17484e+06
A0A0D3B7B5	42188.3	32520.3	43126.2	30636.9	57031.1	40588.3	69276.3	8760.5	48873.3	73357.8	43394.9	43965.8	62414.5	48914	32633.3	22988.3	22599.3	23790.4	16892.8	46737.5	16630.2	20415.3	22532.4	24836.5	28554.7	28245	29824.7	72008.3	26338.8	37709.2	48834.5	16603.3	80745.9	46608.2	25113.8	69534.2	23874.8	16260.3	52059.4	38823.5	117259	137849	60107	75840.9	55581.4	19155.5	50809.6	131625	Filtered
A0A0D3B7B7	152358	100771	51662.7	73374.5	68737.4	64550.4	65965.7	69948.9	19661.9	19037.3	14522.1	19330.3	14337.9	20546	22218.9	14242.3	18795.1	22572.7	16885.4	24610.8	25016.2	21012.5	14908	23043.2	14812.7	19513.5	24703.3	15059.7	10963.3	17240.6	14020.3	36864.6	35013.3	21251	38075.2	28128.6	8457	25586.3	26510.2	26578.1	57868.1	52787.8	49397.7	44905.4	78905	50476.6	119500	201039	47550.9
A0A0D3B7J6	1.17171e+06	472771	355566	719203	464166	625039	304347	419846	410790	149709	627175	304462	344488	614925	379376	624533	536886	379544	289643	300464	294251	710291	553668	584018	874236	614654	816486	252897	669163	597025	675749	1.07943e+06	419432	851704	737094	395834	948742	668260	851907	1.00336e+06	734595	727476	845722	1.07946e+06	1.18044e+06	795257	1108519	1.2069e+06	437337
A0A0D3B7K7	Filtered	Filtered	Filtered	12132.3	Filtered	Filtered	Filtered	17869	Filtered	Filtered	6605.66	5878.24	21647.1	Filtered	15652.3	38479.7	22883.7	8519.87	11525.7	12186.5	20258	20544.6	18685.2	10738.5	16940.8	5789.99	9997.79	3112.81	30349.3	7138.24	11651.1	30582.1	2462.28	14541.7	Filtered	2956.12	8113.04	Filtered	26464.7	7637.01	8502.77	Filtered	Filtered	Filtered	6696.76	24128.2	18340.5	18498.2	Filtered
A0A0D3B7T8	Filtered	Filtered	Filtered	Filtered	Filtered	Filtered	Filtered	Filtered	23232.2	Filtered	Filtered	1071.97	Filtered	Filtered	Filtered	Filtered	Filtered	1271.09	Filtered	Filtered	Filtered	Filtered	Filtered	Filtered	Filtered	Filtered	Filtered	1089.63	Filtered	1399.88	Filtered	Filtered	Filtered	Filtered	Filtered	1523.2	Filtered	Filtered	1	Filtered	5299.63	12071.5	Filtered	Filtered	1589.54	3437.06	2291.04	Filtered	Filtered
A0A0D3B7V9	Filtered	Filtered	Filtered	Filtered	Filtered	Filtered	Filtered	Filtered	Filtered	Filtered	Filtered	Filtered	Filtered	Filtered	Filtered	Filtered	Filtered	Filtered	Filtered	Filtered	Filtered	Filtered	Filtered	Filtered	Filtered	Filtered	Filtered	Filtered	Filtered	Filtered	Filtered	Filtered	Filtered	Filtered	Filtered	Filtered	Filtered	Filtered	Filtered	Filtered	Filtered	17398.9	2103.58	Filtered	Filtered	Filtered	Filtered	Filtered	Filtered
A0A0D3B7W4	1.37402e+06	670197	1.06521e+06	829233	1356634	2937201	1.20771e+06	979082	848182	422317	192303	99262.3	75281.9	96712.8	139182	109061	287553	291361	329059	412674	322408	252574	108648	302145	368842	401948	629864	274104	115122	307359	755762	194163	187553	123696	97417.2	199183	108507	88408.1	71067.5	53043.5	937362	1.12784e+06	1.26236e+06	977741	896464	1.16047e+06	867542	779154	205741
A0A0D3B7W7	78594.7	70913	66257.3	203178	Filtered	Filtered	116891	65638	32945.8	49693.1	48129.6	35663.9	60679.3	28386	40650.2	11414.9	112260	92774.2	105203	104914	56607.7	81851.2	105812	88137.7	106819	51741.1	136334	68326.7	15212.3	47947.4	64505.8	54273.6	56478.3	95494.1	59961.1	96494.1	35898.4	94113.1	38979.9	38764.6	47054.5	45308.6	54495.7	Filtered	40269.9	28791.6	63012.2	54640	33579.7
A0A0D3B7X1;A0A0D3CRX6;A0A0D3E8T5	362474	227780	287415	246368	400585	893648	593660	255640	368893	656317	345744	607251	557041	229622	632409	314243	436576	552056	753177	768887	801846	317338	510768	393252	457756	541158	428399	580529	230262	522267	377012	364038	485717	191037	213546	695868	206612	215413	168952	241836	866712	642670	341943	283582	373291	318351	372744	197556	526860
A0A0D3B7Y2	Filtered	Filtered	Filtered	Filtered	Filtered	Filtered	Filtered	Filtered	Filtered	16909.3	Filtered	16682.9	Filtered	22769.6	12685.4	Filtered	Filtered	Filtered	Filtered	Filtered	Filtered	6600.98	Filtered	Filtered	18631.7	Filtered	Filtered	12882.6	Filtered	12333.4	16715.2	Filtered	Filtered	Filtered	Filtered	Filtered	Filtered	Filtered	Filtered	Filtered	Filtered	45932.2	48728.8	50153.8	83195	89292.2	108013	Filtered	18560.9
A0A0D3B7Z2	207819	153030	239738	251398	243829	466976	181739	155389	368585	155986	301566	175178	187483	336188	198631	298665	164238	242042	147331	205635	116531	198689	109696	196249	511910	507568	586486	671178	517460	419546	389142	487786	295759	323738	251671	203224	494323	299041	330876	361203	221026	313625	333278	422448	353162	375051	243599	294309	199969
A0A0D3B7Z5	215993	223920	221781	137007	201440	1277143	272551	102090	670537	257272	56275.8	86294.8	194088	Filtered	56656.1	66563.5	113094	97809.8	145711	186029	157818	75794.7	111431	129475	50230.2	102688	12625.3	143870	157708	148834	556201	138816	85497.6	113137	100962	121890	112620	138868	95571.4	20469.4	227218	363570	233347	142526	200119	326914	621315	428003	396619
A0A0D3B801	122015	78823.4	101577	156280	167255	76167.4	163483	142832	161554	204143	247681	250771	225812	345006	219719	301195	190230	157902	197681	217577	187499	201866	183768	168671	166026	116834	146921	98522	153970	128001	140500	138202	208216	176097	187652	160877	199586	237308	271819	203542	126368	122020	128210	230721	114250	118853	134129	161804	31711.5
A0A0D3B829	Filtered	Filtered	Filtered	Filtered	1	Filtered	Filtered	1	Filtered	33367.9	51214.7	21300.9	5857.92	23156.5	Filtered	66447.3	4022.73	8846.31	5162.62	1	1084.21	4717.82	2249.71	4714.68	8169.24	9774.6	21255	23828.5	22639.1	7938.41	11968.4	5536.49	9019.26	38089.5	Filtered	6438.6	7586.58	15023.5	31060.8	7828.48	1.66863	Filtered	Filtered	Filtered	Filtered	Filtered	Filtered	16843.8	15775.4
A0A0D3B844;A0A0D3E956	533704	372299	437161	354003	545584	688734	439695	462355	538603	237074	257209	279250	280714	323130	267169	269474	233975	271486	296810	347113	259196	282418	259923	254441	256298	269389	257630	278409	220108	321258	291297	283157	263623	210524	235167	264448	300448	284983	220684	395598	439492	466144	397416	438123	582219	409897	467639	677270	318992
A0A0D3B858	472364	353702	373780	513893	488248	443547	438667	483018	150787	363308	362604	371655	355949	348478	291958	365043	241217	293343	260944	264755	218122	241493	243531	193559	255083	253804	241603	370572	251722	294900	192902	199288	266336	329102	299634	302142	356382	372625	344569	346454	438301	323092	316449	300697	338539	427552	385492	357489	327736
A0A0D3B879	73793.9	26024	45050.9	35596.1	72476.2	129042	40795.3	44402.6	237629	39001.6	32813.9	25882.9	47137.1	Filtered	56064.9	41600.9	43018.8	52500.5	50037.2	54845.2	91560.1	60966	56782.9	57933.1	38254.3	46264	45270.2	66300.1	35770	80457.7	78277.4	57827.7	54029.4	29957.2	42909.1	27301	57083.6	39489.8	40844	41970	Filtered	57849.9	38197.9	42312.2	66400.9	57061.1	54457.6	62134.4	29302
A0A0D3B898	73343.2	49017.8	29154.8	Filtered	Filtered	Filtered	Filtered	56921.1	32525.7	59199.4	76425	51812.8	65653	102618	62847.9	99194.9	74816.7	43631	20189.3	34638.8	43064.9	94392.7	87142.3	83712.1	55022.6	27887.7	49618.8	27005.4	41609.3	Filtered	42048.6	65381.2	21223.6	65100.3	Filtered	59003.5	92666	63326.2	80638.7	78520.4	28704.7	Filtered	Filtered	Filtered	28076.6	31192.2	38160.2	45051.6	Filtered
A0A0D3B8D1	Filtered	Filtered	Filtered	Filtered	Filtered	Filtered	Filtered	Filtered	5290.69	6950.82	Filtered	2247.51	1	Filtered	4194.87	Filtered	Filtered	1	18445.6	13611.2	12760.4	Filtered	Filtered	1954.46	Filtered	Filtered	Filtered	7602.76	Filtered	249.487	Filtered	Filtered	4032.15	Filtered	Filtered	12717.3	2615.38	Filtered	Filtered	Filtered	6185.12	Filtered	1038.84	Filtered	1024	Filtered	Filtered	Filtered	11639.9
A0A0D3B8D2;A0A0D3E8N9	Filtered	4193.06	Filtered	Filtered	Filtered	Filtered	Filtered	Filtered	8164.84	20824.2	Filtered	18845.7	Filtered	Filtered	Filtered	Filtered	27582.7	Filtered	29927.2	Filtered	Filtered	Filtered	Filtered	17617.8	Filtered	Filtered	Filtered	5528.21	Filtered	Filtered	Filtered	Filtered	17206.1	51532.2	30654.1	Filtered	Filtered	40043.3	24964.8	48256.2	Filtered	Filtered	Filtered	Filtered	Filtered	Filtered	Filtered	Filtered	42950
A0A0D3B8D6	104290	6784.93	48643	Filtered	65742.9	65766.5	44675.1	26878.1	259118	38035.6	2165.81	5785.98	27200	1	43626.3	4988.16	22065.1	962.433	33127.8	32829	36416.3	9472.3	8096.03	25051.8	1	4403.77	Filtered	Filtered	6262.04	17642.5	25083	9417.54	29775.7	14474.7	19137.8	7472.1	5814.35	15250.3	18840.3	19739	33538.8	43658.9	32412.2	2596.88	32529.6	41458.9	17398.7	Filtered	49746.8
A0A0D3B8G5	276955	73303.4	78080.5	192679	121581	Filtered	96617.2	134161	233749	52717.5	161368	114656	132704	218044	121420	191352	133779	88942.1	101000	59050.5	103965	196213	215868	164831	270072	166439	205999	59839.2	293607	136492	235734	400227	76595.9	Filtered	115169	59300.7	206068	191906	161380	193321	Filtered	Filtered	Filtered	Filtered	69150.2	Filtered	75416.5	Filtered	34516.6
A0A0D3B8J5	50178.3	36891.8	22202.3	114004	73184.3	51053.1	233824	55008.6	63784.2	28713.3	70012.1	32835.6	34505.2	46669.5	23853.1	55130.2	18918.1	9914.38	23679.5	17913.2	12748.3	29183.6	7248	40176.5	18568.1	13385.6	20643.5	51214.2	34458.3	32063.2	21181.8	7711.89	18209	49865.3	21477.6	21525.8	44782	39218	26573.8	17092.9	77450.6	144419	111417	62200.1	61619.3	129963	58815	109628	22698.6
A0A0D3B8J8	120714	16624.3	192363	Filtered	270702	237104	166048	37761.6	151395	44817.4	38025.5	78988.2	33071.7	146473	187993	45500.8	59045	91651.2	91929.7	101584	158548	95664.4	96522.3	82150.8	44080.1	101927	53950.1	109432	70139.7	212431	99175.1	106674	155862	34658.5	79320.2	95968.1	139361	63680.1	91007.5	109393	104904	124841	52813.8	19279.6	99718.3	41116.1	111383	105138	121923
A0A0D3B8K4	274175	176771	169855	244229	204724	226918	108577	322360	98908.4	35611.5	74840.9	35415.9	43005.5	144148	47793.8	1163.97	56435.9	32915	78529.6	40944.7	48847.9	63448.3	48689.1	Filtered	121484	39820.9	147384	104683	47187	59184.7	122325	91511.7	33828.6	76148.1	68114.7	32503.2	84343.9	62365.8	105759	187832	66446.1	54743.2	52525.4	91849.3	70556.8	78121.8	99930.3	184005	48084.7
A0A0D3B8L3	13672.2	Filtered	28387.8	Filtered	Filtered	426197	Filtered	Filtered	Filtered	71596.5	1	Filtered	1758.86	Filtered	Filtered	Filtered	6955.36	659.83	15735.2	6315.1	Filtered	5181.98	1	8773.86	1746.23	Filtered	Filtered	1	4539.25	19471.5	191297	Filtered	Filtered	Filtered	Filtered	1481.92	Filtered	Filtered	Filtered	Filtered	Filtered	12263.1	Filtered	Filtered	Filtered	Filtered	Filtered	Filtered	Filtered
A0A0D3B8M1	67627.5	18057.9	16505.1	37119.3	49827.4	78578.6	34972.8	78137.7	61619.4	53351.8	68061.7	39287.3	90321.5	93192.5	58741.7	90177.7	41017.9	30267.9	40011.9	27949.4	35888.7	61288.1	51011.1	30773.5	52058.7	28060.4	53023	45487.6	73325.5	38402.6	71748.2	59593.2	33542.3	47682.4	43282.5	24514.5	52785.2	79946.8	85959.3	93143.7	25220.7	24763.2	27390.4	57760.6	52813.1	21006.1	32456.6	41239	24295.4
A0A0D3B8P7;A0A0D3E058	685461	445314	549771	855486	1.03338e+06	4631742	609709	538506	263946	429104	405321	308121	329039	411860	258823	487104	293050	430506	266666	291959	299070	375517	347193	350600	421816	414226	446954	393544	531227	419285	380060	695932	139913	455968	348202	277727	386317	381417	406131	471492	554374	389742	451842	400418	425977	315083	426551	223451	235431
A0A0D3B8X7	Filtered	Filtered	Filtered	1885.31	Filtered	Filtered	Filtered	1007.19	2302.29	445.668	2300.34	265.372	Filtered	2368.06	Filtered	289.366	2105.71	836.861	1162.72	464.82	210.929	1395.11	1043.2	2583.66	9114.11	4066.26	4394.03	4227.9	4106.88	1433	5678.69	4379.05	3730.97	8601.8	1571.99	1424.04	7252.79	6307.73	3863.66	4093.31	Filtered	1759.08	2846.71	6671.61	2014.01	10928.9	3378.15	Filtered	3605.39
A0A0D3B8Y1	178012	216050	186245	621996	Filtered	Filtered	249038	Filtered	178431	596477	69714.4	300310	229690	101251	161491	144853	347851	387370	907325	355922	1214592	23296.7	71344	355194	84633	139040	200937	171571	108001	48509.6	134333	130597	465166	361449	158732	491110	44749.8	108730	327454	364129	15878.8	130907	218991	Filtered	Filtered	170657	Filtered	Filtered	450552
A0A0D3B917;A0A0D3C6Z7;A0A0D3DZT6	Filtered	Filtered	Filtered	Filtered	Filtered	Filtered	Filtered	Filtered	357597	73884.6	Filtered	74282.5	34230.8	Filtered	Filtered	Filtered	25534.5	29079.3	Filtered	57774.1	36574.6	Filtered	26526.9	Filtered	Filtered	58540.8	Filtered	43262.6	Filtered	83192.8	40731.9	Filtered	Filtered	Filtered	Filtered	31540.4	17340.8	Filtered	Filtered	Filtered	257373	279383	267360	192551	375877	243595	176180	300562	61303.4
A0A0D3B921	1	1018.37	14642.8	1	1	Filtered	Filtered	Filtered	41171.8	27172	31594.2	25279.9	19640.3	43214.5	36592.1	Filtered	17195	31889.1	Filtered	29740.4	23097.3	24447.5	5047.06	38073	42547.1	26608.3	27345.3	35737.2	25771.5	31886.3	24967.2	Filtered	37512.8	18993.7	20945	32329.5	Filtered	32873.9	24036.9	21077.3	19945.9	Filtered	Filtered	1	1	Filtered	Filtered	Filtered	28509.9
A0A0D3B926	76184.1	128049	81721.3	204737	195015	281909	76283.8	154138	907449	164051	220365	210001	216381	193244	248652	238489	74635.1	120073	96337.6	101559	171306	99357.8	108510	82760.4	72174.8	130498	84039.8	109881	102104	143970	171609	111305	180213	154399	192957	207495	351603	206258	130865	222225	86002.5	98979.8	76315.4	63213.2	54468.5	73595.4	63032	186164	258204
A0A0D3B929;A0A0D3DZR7	Filtered	Filtered	Filtered	Filtered	Filtered	38746.2	13935.2	Filtered	46220.9	37656.3	15135.5	36286.7	32610.6	37735.3	19158.4	28837.1	48044.3	37655.4	42387.5	50194.2	49791.8	36619.8	29535.5	48929	38412.3	51815.4	56096.5	45483.1	48114.7	55085	49866.8	51068.5	31703.3	33186	32347.4	36198.9	33483.4	34797.8	22995.3	43120.2	78740.8	55256	53572	47966.9	50157.3	89714.2	84338.8	66074.7	52924.6
A0A0D3B939	224431	142416	115945	231524	158960	196979	115143	189291	141857	145332	294575	134669	144415	225988	116524	180693	146421	105313	97755.3	149058	97190.9	161679	144071	239245	198171	113110	167520	154411	162033	86356.4	152323	186315	98727.3	174159	97465.8	100238	168536	218239	172383	169484	220917	112380	176438	234625	259363	203456	223859	299760	150261
A0A0D3B940	Filtered	23376.1	55156	21282.3	43914.8	23624.3	56336.6	42892.6	31894.4	40277	7324.38	25336.6	38555.6	23261.5	50607.3	27048	30045.2	31965.4	27185.6	18327.7	56232.9	16846.4	20741	22456.8	8884.88	25719.9	5282.12	39290.4	11627.4	31260.5	26564.1	9650.75	17049.6	12793.2	28506.3	45403.8	4813.87	14017.3	15332.7	27027.8	59611.3	71689.1	45823.2	6051.43	3561.53	56663.7	30703.7	14376.7	73342.3
A0A0D3B980	33931.2	162862	68170.3	152950	Filtered	Filtered	77411.6	90737.9	114727	86156.5	118716	90636.1	69985.4	144631	46200.8	105236	61740.3	29928.4	51604.2	37239.2	36811.1	65697.1	72318.1	73456.9	180513	36598.4	64015.9	33734.5	98842.5	82624.7	157815	59832.1	Filtered	120989	47467.8	46522.7	78469.9	124940	82147	Filtered	226330	136703	280146	335924	343625	341434	268997	319643	78645.6
A0A0D3B985	35216.9	50862.4	1	1	71547.8	1.08654	182697	Filtered	192763	119033	168355	93914.5	157868	70240.5	164732	112733	149171	152042	223808	188310	129362	163343	202841	150704	158361	125040	133425	101943	56514.4	128929	96152	37624.9	91301.1	86422.2	138210	133215	118284	78704.6	115632	162468	34235.9	156609	156591	51412.5	19516.9	133262	37129.6	25913.6	224637
A0A0D3B998	60083.6	64786.6	87303.4	110147	234070	85167.7	68923.9	58868.7	667368	332481	716804	426342	411399	867470	242805	529567	523999	236298	439102	519177	240011	420194	404648	453872	263783	113446	209122	233779	221201	76042.3	290106	205011	238857	434705	342175	228423	377508	608983	351138	500264	39234.2	18461.8	16118.5	38493.9	9065.11	33632.5	25199	48224	112263
A0A0D3B9A2	1687602	783031	1.06629e+06	1.44559e+06	1.55393e+06	3.26479e+06	808441	2.56778e+06	2.56158e+06	536176	1434853	937306	633905	2.17153e+06	621691	1.11549e+06	732131	622228	411163	588556	538456	956073	1.06245e+06	858247	1.28215e+06	953196	906139	1.01221e+06	1.24728e+06	1.27738e+06	460481	1.66255e+06	357617	263929	674279	332448	704085	859297	345030	956391	776097	805647	731945	1.06273e+06	1358200	1.0478e+06	1.27069e+06	1.87556e+06	261521
A0A0D3B9D5	50229	202905	50560.4	78102.3	78944.2	327230	49417.5	172803	192905	39099.7	83059.6	113173	81469.2	339421	133566	213046	60318.1	22024.3	78154.2	27489.5	5834.66	90913.5	46892.1	53574.8	89574.2	51846.8	27382.9	57273.6	146179	19179.2	143673	38012.5	57608.4	186015	125912	24120.1	213602	396584	177079	284913	95299.2	Filtered	71278.6	44119.2	126435	23777.4	148426	181570	116909
A0A0D3B9F2	19155.6	78236.7	91511.1	30676.7	24172.9	62955.4	21278.8	35263.4	100736	27810.8	62586.9	64847.3	47295	58437.5	Filtered	51317.6	70909.6	69925.9	44752.3	33243.8	32919.8	32098.2	50971.3	26500.5	121648	113984	46389.7	99791.7	61676.3	86625.2	96730.5	64768.2	118995	68855	89958.3	67404.5	84829	113476	37383.6	80005.5	112273	123224	171726	226031	164044	147331	127143	159061	51507.3
A0A0D3B9F5	61507.2	49310.6	78081.4	61572.2	111910	14058.6	Filtered	1	71124	48447.1	42391.7	68180.5	30218.1	31119.3	75878.4	38252.7	26672.6	36947.4	Filtered	49379.4	70502.6	40067.7	33045.4	43767.8	31339.3	33559.5	29517.4	31586.8	37413.1	34498.3	29721.6	77315.9	38983	33687.5	32914.6	47481	51638.7	51039.8	27702.9	48114.8	63464.2	39353	23695.6	22713.3	28107.7	44055.2	27540	25949	30385.6
A0A0D3B9K0	486159	242738	338161	275696	337525	402548	214066	374409	Filtered	Filtered	Filtered	147833	Filtered	Filtered	3894.04	Filtered	83069.3	281343	85244.6	5418.86	176756	236937	123960	156076	490140	401923	553920	412693	456186	345930	444180	699498	205831	47325.8	120654	217406	64723.1	112150	181383	270554	300681	313633	140071	195553	224180	131291	186880	437921	Filtered
A0A0D3B9K2	Filtered	Filtered	11449.9	Filtered	Filtered	Filtered	Filtered	Filtered	611723	741039	Filtered	Filtered	Filtered	Filtered	Filtered	Filtered	Filtered	Filtered	Filtered	Filtered	Filtered	Filtered	Filtered	Filtered	Filtered	Filtered	Filtered	Filtered	Filtered	Filtered	442679	Filtered	Filtered	Filtered	Filtered	Filtered	Filtered	Filtered	Filtered	Filtered	Filtered	Filtered	Filtered	Filtered	Filtered	Filtered	Filtered	Filtered	Filtered
A0A0D3B9M0;A0A0D3CMU0	517207	538720	340598	256517	414206	551055	439676	397224	611719	661973	351759	528360	472876	340765	593111	391857	505820	644179	470331	829312	672555	639859	758392	661573	272648	421963	458708	400063	278622	545518	428447	587257	302916	269114	324348	639508	349750	354556	322392	430171	663324	552511	210533	134086	158107	348836	367442	129990	623111
A0A0D3B9N3	278424	199593	187667	158706	179568	89634.6	216646	62328.3	112311	66436.1	113844	44992.4	101019	165898	68492.1	84236	97802.9	74965.5	76845.7	94082.4	82282.7	82470.2	76358.8	103636	123580	25143.2	21102.7	19723.9	75792	77408.3	44573.1	Filtered	91967.4	82855	88792.5	100312	105213	133276	76313.5	147385	161781	239961	238771	300840	301152	160223	315716	221882	130394
A0A0D3B9P3	188373	15631.4	82889.5	23402	91408.2	Filtered	29577.3	82133.7	2528.93	11446.3	48852	9919.92	9816.91	Filtered	1	75955	25315.8	52632.9	Filtered	Filtered	1	3371.35	21036.9	7471.81	Filtered	Filtered	Filtered	1261.09	1	21298.8	Filtered	Filtered	1	Filtered	Filtered	Filtered	Filtered	Filtered	Filtered	Filtered	149896	291989	150706	366099	1.25762e+06	467346	239429	77287	16210.9
A0A0D3B9T6	1.75583e+06	1.318e+06	2.07933e+06	1.76648e+06	2.58955e+06	2.11296e+06	1.69982e+06	1.24951e+06	1914291	1.96195e+06	2003964	2.18558e+06	2.20303e+06	2.16037e+06	1.98971e+06	2195849	1.42492e+06	1.72418e+06	2.03308e+06	1.94273e+06	1.59997e+06	1.3984e+06	1.71883e+06	1.53264e+06	1531518	1.49543e+06	1.45181e+06	2.09569e+06	1176647	1.70349e+06	1.20981e+06	1.39718e+06	1.24646e+06	1.19658e+06	1.37707e+06	1847270	1.47586e+06	1.891e+06	1.50325e+06	1.98713e+06	2043989	1.78148e+06	1.09722e+06	1.28966e+06	1.38987e+06	1.44458e+06	933456	1524202	2.0802e+06
A0A0D3B9W3	443925	343963	370609	348863	508167	690793	494597	402898	134672	209769	225651	91582.3	80969.1	137941	198490	150229	559286	372374	502151	646585	545080	624757	625825	650202	486010	338342	401925	216218	339569	274119	331301	425545	128886	50664	517060	335313	138120	129399	424324	47842.3	358229	245681	266224	434896	456692	221319	406297	589585	623235
A0A0D3B9Y7	Filtered	Filtered	Filtered	Filtered	Filtered	Filtered	Filtered	Filtered	Filtered	Filtered	29940.1	13999.1	Filtered	18871.6	14839.2	Filtered	12123.3	8549.7	15253.2	1	Filtered	9322.12	15858.3	25047.4	15041	Filtered	3302.76	11004.6	Filtered	Filtered	27624.2	Filtered	6798.39	26631.6	7930.55	3380.74	14686.8	15317.4	25232.6	15162.2	Filtered	Filtered	Filtered	Filtered	Filtered	Filtered	Filtered	Filtered	5982.75
A0A0D3B9Y8	Filtered	Filtered	Filtered	Filtered	Filtered	Filtered	Filtered	Filtered	10675.5	6433.24	16174.3	8430.63	5549.64	13490.8	6713.73	10989.2	Filtered	Filtered	Filtered	1	Filtered	Filtered	Filtered	Filtered	Filtered	Filtered	Filtered	Filtered	Filtered	Filtered	Filtered	Filtered	Filtered	Filtered	Filtered	Filtered	Filtered	Filtered	Filtered	Filtered	Filtered	1	Filtered	Filtered	Filtered	Filtered	Filtered	Filtered	Filtered
A0A0D3BA36	Filtered	10090.3	Filtered	Filtered	Filtered	Filtered	Filtered	Filtered	15390.1	15652.8	15527.5	13783.1	9730.58	9804.62	8118.86	13301.6	4634.65	6283.83	6752.93	3826.19	4565.01	Filtered	6749.66	10329.9	6759.03	6006.38	9123.14	5083.07	1113.9	4210.33	6413.9	1628.16	12354.7	13703.1	18039.9	11028.9	18044.3	12108.7	7983.77	8665.78	10331.3	6428.57	2452.32	8872.21	5706.77	4793.68	6575.54	8314.38	1880.25
A0A0D3BA48	Filtered	125931	27932.6	174165	91775.6	141652	Filtered	202051	237934	99725	154115	125025	91618.3	253555	59843.2	185426	105084	59506.2	74043.7	14538.7	50075.4	59853.3	179460	136115	249299	94477.6	98100.9	37492.8	290336	68257.9	275236	341303	Filtered	256637	70928.5	55773.3	331143	138005	215825	195692	190538	81290.7	155598	129747	270513	150804	215714	Filtered	94244.9
A0A0D3BAB6	1.01022e+06	593312	656137	639954	727620	678671	508134	678060	755590	517262	1.09537e+06	591300	634282	819131	504563	882583	649983	626482	567588	806313	507778	666182	610473	735981	963362	697424	867201	808442	735604	623043	733866	882159	618562	857109	889648	614536	938898	747968	827974	1.00974e+06	482545	359880	415337	821747	963580	613051	705056	680730	757515
A0A0D3BAB7	424626	246917	249409	387362	270371	492033	199413	557449	517315	316750	564762	353313	389849	598965	318307	480776	342055	254766	276158	291243	283146	346009	308537	368122	537398	350608	425439	436152	432018	335989	378222	473952	333258	764191	519092	416012	576825	668622	629292	654382	556766	393975	608650	662875	638474	604046	628553	828560	576056
A0A0D3BAC2	1	35245.4	66748.9	76971	95086.8	14148.6	106018	27144.9	2565.44	69453.1	52069.4	36233.5	31229.2	30833.8	47252.7	59178.2	96660.8	75032.2	77087.3	110050	111872	61430	93252.3	73327.8	38756.5	43555.7	48012.4	50679.3	46581.2	27134.9	36243.8	35846.5	99248.3	43833.4	91053.3	85756.6	78244.9	41226	47772	67864.5	56664.2	48100.8	32549.8	1	36504.7	14316.5	52207.1	39292.4	32076.2
A0A0D3BAC8	Filtered	Filtered	Filtered	Filtered	Filtered	Filtered	Filtered	Filtered	Filtered	Filtered	Filtered	Filtered	Filtered	Filtered	Filtered	Filtered	Filtered	Filtered	8929.62	13282.1	6295.73	10238.9	14709.2	9552.48	Filtered	Filtered	Filtered	Filtered	Filtered	Filtered	Filtered	Filtered	3863.48	9363.9	Filtered	Filtered	2673.32	7642.86	11037	14461.9	Filtered	Filtered	Filtered	Filtered	Filtered	Filtered	Filtered	Filtered	Filtered
A0A0D3BAD4	1.32856e+06	Filtered	Filtered	Filtered	Filtered	Filtered	Filtered	Filtered	242635	350079	236542	538219	372085	229701	625833	513525	554600	751113	945581	928073	967759	633442	744396	599575	443372	566289	464657	572623	440329	670463	327646	600091	247831	249325	122714	302993	223244	353822	63772.5	443395	Filtered	Filtered	606354	Filtered	Filtered	822900	Filtered	Filtered	501403
A0A0D3BAI1	1.01629e+06	587776	345858	561524	1.20908e+06	1202739	390245	798558	563283	97134	303158	131584	143343	211391	116751	90513.6	112535	100175	100453	74727.8	169499	158762	98687.3	98111.8	124617	110769	156367	104740	140113	82371.2	102136	188239	76554.2	141460	255857	46889	112242	226483	161957	330575	494185	438404	812056	630935	752412	666459	746382	710024	50324.2
A0A0D3BAL6	343551	322494	138178	311462	242482	448245	183080	421105	423850	248599	522373	289528	373678	503317	201270	333763	328059	248475	230885	257205	199050	337757	335416	331746	463993	223321	370121	337085	415836	213902	362440	366683	134813	348178	240879	194593	357360	376306	366267	306653	252952	175325	288147	322874	325369	359922	345402	459978	238663
A0A0D3BAQ4	387572	255575	250760	231650	237773	282322	325685	238961	170020	114743	167456	130408	167634	234413	178020	130306	174647	124652	170240	190209	163294	177110	192979	208383	140550	145119	182876	151870	91076.6	151047	132449	104692	119892	128925	160305	123191	145049	166282	180734	153826	259228	209919	233752	251906	288300	226705	309023	290137	135298
A0A0D3BAR1;A0A0D3CL56	5.6677e+06	1.38702e+06	1.7367e+06	2.6265e+06	2.70973e+06	3.53006e+06	1.68637e+06	2484455	2.14616e+06	3275630	2.74792e+06	1.96734e+06	2.69156e+06	1.34528e+06	3213097	1534960	1892824	2.61857e+06	4522395	3.13645e+06	3.03423e+06	1.82498e+06	2.47117e+06	2.02314e+06	1.55205e+06	1.83798e+06	1.63853e+06	3854792	2.09161e+06	2.82786e+06	1.20636e+06	4.0426e+06	1.62725e+06	1.30504e+06	1.80703e+06	2.88184e+06	1.80684e+06	1.98392e+06	2.78626e+06	2.02051e+06	4.10736e+06	2.99606e+06	1.57567e+06	1.54215e+06	1.89869e+06	2.12402e+06	1.57909e+06	2.22221e+06	2.58394e+06
A0A0D3BAT8	Filtered	Filtered	Filtered	16353.4	36143.9	46485.3	12424.3	Filtered	Filtered	Filtered	Filtered	Filtered	Filtered	Filtered	1	Filtered	Filtered	Filtered	Filtered	Filtered	Filtered	Filtered	Filtered	Filtered	Filtered	Filtered	1	Filtered	Filtered	Filtered	Filtered	Filtered	Filtered	Filtered	Filtered	Filtered	Filtered	Filtered	Filtered	Filtered	90461.1	54191.6	68509.4	36534.5	40613.2	81769.7	66046.4	44302.7	Filtered
A0A0D3BAU9	Filtered	Filtered	Filtered	Filtered	Filtered	Filtered	Filtered	Filtered	Filtered	Filtered	Filtered	4978.95	4787.45	Filtered	3815.22	3567.96	Filtered	Filtered	6410.61	4324.63	1559.25	Filtered	Filtered	Filtered	Filtered	Filtered	Filtered	Filtered	Filtered	Filtered	Filtered	Filtered	Filtered	932.767	Filtered	2506.62	995.814	Filtered	Filtered	Filtered	Filtered	9793.7	5766.09	Filtered	Filtered	Filtered	Filtered	Filtered	5526.6
A0A0D3BAV7;A0A0D3BR95;A0A0D3C4R3;A0A0D3CL16	Filtered	44700.8	58100.1	Filtered	Filtered	Filtered	48388.1	Filtered	111192	164370	11004.9	39331.5	36035.9	6835.16	11122.5	22166.1	45905.6	35992.1	74393.4	59891	42316.4	29177.1	39705.5	15873	41090.7	54464.6	40361.6	64974.7	26674.9	38160.2	70594.7	37941.4	53982.6	32225.9	20562.6	65424.8	56786	26744.7	24888	38921.6	64248.7	64450.6	49490.8	81142.4	37962.8	Filtered	23341.8	12715.3	47326.9
A0A0D3BAV9	Filtered	25430	51255.9	47369.9	47764.8	62281.8	66848.5	57331.7	26396.7	72729.8	104906	80684.7	97992.9	89126.2	71072	99896.1	68771.4	44128.8	36047.5	101106	42357.1	30244.7	38596.2	86262.2	26117.7	42605.1	32667.8	75195	26749.9	43168	26094.4	31036.7	38850.8	32715.3	66078.1	44087.4	25684.2	34209.6	48335.2	68488.9	10397.9	16508.7	6408.98	15032	Filtered	Filtered	7669.64	Filtered	23510.6
A0A0D3BAX8	299286	174609	200918	191325	254135	313713	1.5201e+06	279924	637687	199200	251400	202992	237881	290395	173216	139695	58801.8	200609	121016	107723	71964.9	71326.4	75231.8	63811.2	162954	156999	109097	273440	187997	144676	141493	148127	342557	178815	176019	224837	143340	224423	186679	242731	355364	784172	851646	818807	520482	657678	217943	1.2851e+06	273453
A0A0D3BAZ0	Filtered	1	Filtered	Filtered	Filtered	551394	78497.9	Filtered	21903.7	28774.4	4867.61	25482.2	31568.5	Filtered	12837.7	7216.26	9657.3	7676.16	16221.5	27277.6	8822.93	22882	20018.9	11856.8	Filtered	14389.3	7584.13	3532.85	6859.3	20084.2	12086.6	6943.11	48329.2	2763.55	3822.07	14055.2	4125.58	6297.39	Filtered	Filtered	Filtered	Filtered	Filtered	Filtered	Filtered	552.484	1	Filtered	16094.5
A0A0D3BAZ5	15770	11125.2	5160.68	10247.8	Filtered	6238.59	Filtered	22289	44024.8	9799.59	16286.1	9582.23	2358.03	13646.4	4122.42	5121.6	4241.92	8518.07	5151.29	1984.45	8927.5	9022.93	6121.32	13063.3	18864	10460.5	10826	12696.2	9794.76	3933.52	15979.5	11666.2	6288.94	6400.01	7510.02	9417.16	12943.1	19295.8	16680.1	11508.3	6981.33	2991.36	13820.4	15424.6	17358.9	18819.2	9111.42	8351.59	7588.11
A0A0D3BB01	170634	86945	105651	39560.4	116913	393531	120502	27547.7	244611	96706.7	23246.9	89366	49847.1	55190.7	63535.9	27040.9	74189.2	58426.9	125966	129497	65398.1	51972.5	38206	63889.8	124313	93425.7	123333	132578	28578.4	131732	122918	80813.4	204041	78279.3	54879.2	123541	89691.9	88579.8	59380.3	50729.5	168727	261539	86293	161646	121866	127586	138415	Filtered	101645
A0A0D3BB20;A0A0D3CKQ5	Filtered	Filtered	Filtered	Filtered	Filtered	Filtered	19312.5	23829.8	Filtered	Filtered	Filtered	5858.38	Filtered	Filtered	13424.3	13445.8	9908.61	13562.9	20496.3	7752.36	13638.3	Filtered	21710.2	14156.8	Filtered	5928.66	Filtered	Filtered	Filtered	Filtered	1	Filtered	29321.6	26751.2	Filtered	20576.4	38823.3	Filtered	29823.2	18259.6	Filtered	3159.05	Filtered	Filtered	Filtered	Filtered	Filtered	Filtered	Filtered
A0A0D3BB49	Filtered	Filtered	Filtered	5547.7	1.01602	Filtered	18081.9	7851.8	Filtered	18099.7	4781.64	18039.4	19832.1	Filtered	10428.7	9208.48	13712.9	20706.7	24655.1	7004.91	22020.9	5066.69	11813.3	16201.1	24546.7	12278.8	25924.1	23863.7	18858.9	20225.9	16421.6	21041.6	16465.1	22522.2	16812.8	16342	12866.5	20155.8	31060.8	12231.4	Filtered	10384.9	Filtered	1	23222.9	Filtered	Filtered	17671.2	34446.8
A0A0D3BB64	Filtered	Filtered	Filtered	Filtered	Filtered	Filtered	Filtered	Filtered	119254	52490.8	68087	70341.2	57281.2	Filtered	53871.3	Filtered	79799.8	52038.4	76291.2	100511	79139.7	47174.7	52766.5	85225.9	50328.6	47545	64579.5	65429.1	24630.7	66340.1	38958.9	64588.1	46171.4	44768.7	Filtered	72930.3	50785.3	51648.8	55363	Filtered	71871.9	57292.7	Filtered	86199.1	Filtered	37943.6	Filtered	Filtered	103951
A0A0D3BB71	Filtered	Filtered	13790.3	Filtered	17956.3	9038.63	Filtered	Filtered	87254	20265.5	27430.3	47139.9	22668.4	45418.7	35239.5	21110.7	14443.6	31872.5	29582	47478.7	64357.5	28149.6	14584.6	12806.4	14691.6	36997	Filtered	19492.4	20880.6	27115.3	26636.3	45210.9	39827.3	14924	27401.1	58191.7	70889.8	26120.1	20837.1	60572	9558.73	20031.3	20627.6	Filtered	Filtered	Filtered	Filtered	Filtered	75098
A0A0D3BB77	546988	182120	265194	365508	492939	Filtered	244408	229341	Filtered	5174.7	20745.3	47188.6	22037.4	54269.1	51511.3	52044	36307.8	28230.5	26250.1	27313.3	89254.8	38253	77095	19976.6	16485.8	42108.2	42008.7	16265.9	55734.5	25476.2	16107.8	100776	123495	50527.2	152284	52184.6	73284.6	27452.2	43290.8	92016.8	90212.6	83354.2	85288.7	73464.3	18444.4	57326.4	77526.7	136263	126842
A0A0D3BB80	Filtered	Filtered	507.045	Filtered	Filtered	Filtered	Filtered	Filtered	2799.46	2080.73	906.876	1901.57	557.068	924.927	4425.52	1182.76	1519.74	2166.08	1026.37	2639.75	1816.5	1187.59	676.369	1076.18	794.101	2346.56	1548.91	1876.5	3007.36	1884.05	2746.67	Filtered	2252.65	1485.47	724.551	2969.12	1956.35	2709.93	1858.81	1384.31	Filtered	613.532	1096.53	Filtered	Filtered	Filtered	Filtered	Filtered	1242.74
A0A0D3BBE1	42014.5	89700	6638.11	58210.9	5426.37	Filtered	5712.34	73658.8	Filtered	16969.7	23523.2	101168	42232.6	67481.9	30028.3	54210	26520.1	17067.7	3788.13	8662.76	1510.57	3121.25	12812.2	2059.84	3781.23	10780.6	1842.83	69319.3	12797.1	41805.7	2380.17	5613.88	884.373	473.111	25848.1	2736.07	Filtered	2011.59	1716.25	1671.43	275709	1193.07	19863	27479	4415.59	105944	174306	Filtered	Filtered
A0A0D3BBK4	Filtered	41689.7	2542.04	Filtered	22021.7	Filtered	24450.5	89900.2	47000.5	59110	135811	78391.7	102015	90233.7	71615.8	98636.5	49736.5	27251.1	61885	15325	21025.4	39503.4	77241.4	46954.8	40938	34032.7	37337.6	23918.1	27194.1	91107	61467.6	1	39042.8	53561.5	44241.6	50789.9	53665.4	120686	44951	96437.7	1726.04	10238.3	4024.79	43335.4	1.12027	4411.33	4864.22	39585.1	9891.21
A0A0D3BBK7	960158	712703	584627	986678	825436	977705	728850	850546	365215	305193	651577	366220	390254	564988	353854	489369	461765	369631	517062	529886	390646	477958	519111	507168	503434	424256	540638	343476	343800	476830	382596	420982	540883	714616	663859	568855	604867	780559	629840	768568	739604	505764	818469	805470	667613	601769	688975	762829	804145
A0A0D3BBS5	166734	35080.7	101737	179550	173560	81367	146018	Filtered	17420.9	21782.7	Filtered	22465.6	10965.1	Filtered	20531.5	4582	24378	31566.7	26967.1	25137.7	55651.5	14118.5	8534.13	20378.6	21653.1	79987.8	62251.8	78279	20142.7	58212.7	15230.3	23224.4	82294.5	33437.1	16621.4	49636.1	1	5844.94	12821.9	3423.47	131372	117467	104557	149652	185439	243964	125429	135027	32343.3
A0A0D3BC17;A0A0D3CIQ7	1.96715e+06	1.02989e+06	600333	954689	971766	1398174	977338	1.49594e+06	1.3859e+06	295823	608861	383684	421972	627076	431588	333435	449222	456907	420813	387309	389263	503964	515747	747333	352045	345565	383866	187408	264490	308624	301455	485028	285214	428871	632427	261431	731617	654017	458211	573935	485725	454160	682582	718408	756018	705878	952040	1130051	434258
A0A0D3BC30	Filtered	6058.79	Filtered	Filtered	Filtered	Filtered	Filtered	Filtered	Filtered	Filtered	Filtered	14526.8	19723.6	Filtered	10408.9	8235.62	Filtered	13514.6	12098.4	13974.5	17004	4574.53	Filtered	3050.14	Filtered	7538.22	5609.03	Filtered	Filtered	Filtered	2824.91	4693.85	7647.64	6656.99	6254.93	1212.14	Filtered	3549.89	8286.05	5522.87	Filtered	Filtered	Filtered	Filtered	Filtered	Filtered	Filtered	Filtered	924.589
A0A0D3BC46	Filtered	10945.2	13210.9	18272.6	1196.94	103917	Filtered	1	44539.1	18441.9	14171	32285	26363.8	9085.66	27154	10747.8	37604	42160.4	56954.4	62188.8	55666.7	31455.7	36097	33202.2	16259.8	29741.5	12266.3	19241	21343.1	27335.1	28023.9	16485.5	39325.2	14464.6	5778.53	49994.2	29285.8	28118.8	18494.4	19988	10578.7	20168	Filtered	1305.98	Filtered	5237.3	Filtered	Filtered	56304.3
A0A0D3BCE8	349370	212954	227267	232367	300183	253097	246706	191916	45931.8	145538	217566	194659	253984	131099	212534	136396	144488	216521	255132	288440	212132	181064	166830	149638	102700	176629	174185	237533	108683	256934	93958.2	218186	88119	86123.1	134303	222721	114678	132475	136836	115089	207854	230904	83586.1	103830	143955	64770.5	102611	183375	179136
A0A0D3BCF1	110775	55253.9	58954.5	114001	82672.6	52610.3	254001	92375.4	36914.3	64024.5	48662.2	30595.1	75176.8	21055.4	29577.9	18594	19949.2	47028.9	21380.9	32165.2	29786.8	28989.5	25608	31829.5	14088.6	27666.6	33502.6	43390.5	28601	48049.6	23419.8	29824.4	22281.2	39134.3	15958.3	47802.9	25206.1	36981.6	33802.4	26966.4	112028	263378	143442	167983	154708	156743	119752	206414	132236
A0A0D3BCH6	44644944	26048498	20966128	39934556	29487192	50862524	18356664	36159708	30892298	9814823	10525631	11516516	10868206	15964930	7988399	15631338	7709278	10491778	9187708	5.34011e+06	7710644	10877787	14179198	9423985	10714139	8.36763e+06	10057837	8997510	12175631	10140125	10220600	16614219	5.60523e+06	9241521	14456302	6.2534e+06	11154186	10611641	10489344	13281182	26065634	22189268	37136560	32545000	26443126	28786662	28081400	52582268	10936099
A0A0D3BCR3	Filtered	3912.7	1	2291.3	Filtered	Filtered	4304.13	Filtered	18204.2	8366.96	11239.9	5248.18	8389.34	1216.91	2148.53	8527.02	5671.86	5349.99	3823.25	4080.99	3360.36	6959.34	7889.4	8688.49	2172.04	3543.88	2805.97	2774.34	6416.07	2420.25	5101.55	2741.96	2643.74	3194.3	4013.6	1617.5	10037.6	10838.1	8426.42	5806.69	10682.3	461.647	10921.4	5230.67	12576.8	6198.95	6415.69	Filtered	7262.84
A0A0D3BCU5;A0A0D3D8Q6	35859	15545.2	22523	29771.4	17248	80901.4	Filtered	15410.8	16253.2	14606.7	Filtered	5918.81	5594.29	Filtered	Filtered	7443.93	10330.7	9231.49	6797.82	5872.93	9658.59	12845.6	9527.83	6522.38	12146	13052.6	Filtered	Filtered	Filtered	17818.3	26011.3	18302.1	4809.62	7057.25	8431.53	8639.77	9041.38	7113.59	6171.42	5789.73	Filtered	Filtered	24325.6	Filtered	14497.6	18400.9	30232.5	25394.5	14552.5
A0A0D3BD05	80221.4	49982.9	36581.5	Filtered	5580.16	Filtered	Filtered	49165.5	127270	69887	77732.2	74708.4	67345	13591.6	82641	114754	77945.6	47528.9	126320	114051	71094.3	177683	194576	103476	70441.2	67275.8	65466.9	68686.6	51365	56235.3	60822.6	121087	48037.8	52972.6	45043.8	90773.6	62016.1	84461.6	90819.4	46534.5	72303.9	97898	52378.8	59008.9	80298	63286.9	90733.5	73659.9	146235
A0A0D3BD26	419176	108157	Filtered	134481	261778	727608	147533	324008	216320	124023	119450	58783.3	86252.1	248709	145003	123267	146068	106473	136101	153292	85896.1	153390	185348	144898	155654	96902.1	113563	139774	92785.1	63906.1	192464	114420	111407	159556	129642	55370.7	104983	218685	128638	132737	220128	66782.4	140547	244640	284665	228955	266632	420752	73371.5
A0A0D3BD72;A0A0D3E3P0	149487	234079	274001	245956	326466	386822	242021	273597	664457	343372	232366	315445	289165	289898	268511	245435	228744	247066	272021	289857	300385	197743	266050	234820	133543	209591	150177	237776	168360	204780	148939	187167	194410	203844	226133	265200	219615	317659	214060	295556	324744	264180	190611	160866	171097	228309	177382	147868	214642
A0A0D3BD78	483492	340472	290557	331876	253735	523318	334054	694425	252233	124769	154012	119072	181761	137117	153666	150053	96554.1	111323	85680.3	110410	126972	92543.2	109391	125354	87597.2	133444	129802	150037	92983.5	151752	92373.2	222181	96845.7	120088	149037	153027	143365	212697	182842	243733	261535	271120	233642	347739	377826	243490	279746	311269	124562
A0A0D3BD94	672342	602958	1155613	1.81028e+06	1.32221e+06	744121	842657	1.61932e+06	489620	947037	541352	503845	892895	1.19216e+06	651944	353235	366665	523049	580581	1.01406e+06	272085	459452	502014	704922	228461	450413	253554	820553	380494	443976	149880	296661	214639	556263	420512	438993	722233	770246	706790	684506	906072	860991	1.03434e+06	1.31319e+06	1.2424e+06	1.47153e+06	985619	797304	491182
A0A0D3BD95	1.17342e+06	981807	854147	981088	1.13451e+06	708376	1.03891e+06	814211	794132	868036	946360	717958	1.10961e+06	953886	928462	1.09849e+06	902815	751795	779350	873367	700633	748431	789522	948469	708453	607112	709041	762483	515711	796213	589448	499894	736633	879496	885093	821333	1.06249e+06	877054	815194	1.04266e+06	1.55105e+06	1.25159e+06	1111733	1095566	1.27687e+06	1.279e+06	1.32251e+06	1.57886e+06	1.09401e+06
A0A0D3BDA2	Filtered	Filtered	Filtered	Filtered	Filtered	Filtered	Filtered	Filtered	269151	36168.8	75929.3	50670.2	44602.2	63796.3	81621.4	63332.4	38368.4	69472.5	82390.9	87513.8	101533	87192.2	69987.2	85671.2	61996	75160	83440.8	45243.2	74652.1	58666	56504.9	122041	85410.3	87337.5	Filtered	97170.6	146606	61482.8	80805.4	135591	Filtered	Filtered	Filtered	Filtered	Filtered	Filtered	Filtered	Filtered	123997
A0A0D3BDA5;A0A0D3BDA6	198684	151840	203481	222353	344384	220138	303615	202310	326708	304091	218234	302074	370138	270295	283265	194787	180114	347136	305962	409404	314207	199869	200513	187521	166145	250944	162933	254204	133410	290219	155404	193185	304094	216274	210073	462594	249214	226270	155481	334758	367696	261534	137884	187229	285655	163872	217992	228672	182985
A0A0D3BDC7;A0A0D3BZ72;A0A0D3D4K3	650010	472442	430626	411937	824262	697927	835679	436865	409000	412386	445419	465265	603867	365860	395211	354909	230673	437118	445383	570349	394858	305182	244641	271546	356555	428153	384537	570655	355414	567836	295551	242218	640198	351496	415698	587224	378457	362200	391204	401353	473736	555576	345835	452064	499095	217292	363504	749445	384113
A0A0D3BDD6	2.47334e+06	1.51073e+06	2.23744e+06	1.11537e+06	1.93706e+06	1.49605e+06	2.03858e+06	1.68879e+06	5676678	3.17832e+06	7876029	3.85835e+06	4.26588e+06	8510620	5250168	4150439	2151160	3.73103e+06	3.62128e+06	3194438	2.81091e+06	4010816	3322721	3.14951e+06	6.14479e+06	4.67369e+06	4.12161e+06	5507653	4.10211e+06	4.08972e+06	4.19331e+06	3898986	5558623	1.92351e+06	6091696	2.76067e+06	3.87319e+06	5.04805e+06	4249019	5.37281e+06	739450	719004	524166	1.19066e+06	1.26162e+06	934607	1.43803e+06	3073951	2774359
A0A0D3BDF6	179306	127016	75726.4	108147	85344.8	Filtered	Filtered	167646	31325.7	100850	171151	101597	113710	279045	167639	176407	162411	128163	99837.3	130568	61334.9	194144	153216	51324.3	142542	69678.8	105618	78852.1	139255	116981	90200.3	175820	21409.7	80131.2	227664	19456.6	29203.5	86560	154781	166214	62505.1	53041.7	96393.6	93593.6	155782	82715	70998.9	Filtered	17392
A0A0D3BDG9	270923	295669	61061.5	202110	323821	427899	118338	471869	530462	364008	266017	74975.6	341405	643652	254928	625990	215520	126389	138284	211683	302678	268888	259201	267174	131261	178155	114946	118133	282958	231391	227343	261953	149300	137121	127371	122860	284235	282065	255686	403439	109575	76418.5	85434.6	209848	366289	344611	369015	402379	80000.5
A0A0D3BDI7	198340	151526	132668	257011	282793	299850	124335	167840	7515.85	68795.5	104521	96327.6	116890	Filtered	101613	75364.7	45882.1	49896.8	64737.5	83274.9	50807.5	120894	75812.6	88731	69056.8	87706	104169	105667	99996.6	53100.8	106752	78921.9	116304	105241	113815	81329.9	67069.2	165084	424285	160017	131479	87243.5	90941.5	94245.4	155005	114696	111936	181580	72390.2
A0A0D3BDK9;A0A0D3E2U4	Filtered	34478.5	193448	47666.6	117964	1.51229e+06	Filtered	Filtered	520926	472364	13482.4	20145.6	48382	20429.7	Filtered	Filtered	40266.1	37938.7	67207.9	119864	160049	45359.3	49718.7	58758.2	1	45064	38580	Filtered	Filtered	68664.9	530626	18326.8	31643.5	45379.4	21849	30476.5	26412.5	Filtered	Filtered	Filtered	46216.3	85727.6	15840.8	Filtered	Filtered	56829	47420.7	25116.7	44260.5
A0A0D3BDL2	27125.3	10157.4	15065	Filtered	25920.7	Filtered	Filtered	1	116272	119898	Filtered	79604.2	69482.3	24992.7	Filtered	12752.1	Filtered	53329.4	113019	109876	100876	67950	31273.1	39545.4	4692.6	Filtered	Filtered	7851.28	Filtered	Filtered	Filtered	Filtered	16029.6	Filtered	Filtered	73701.4	8494.1	Filtered	Filtered	Filtered	Filtered	Filtered	Filtered	Filtered	3667.53	Filtered	Filtered	Filtered	34912.6
A0A0D3BDN8	3236.64	109792	35640	5336.66	1972.32	Filtered	Filtered	Filtered	Filtered	4862.4	17790.4	Filtered	Filtered	Filtered	Filtered	12757.3	4126.19	7850.81	Filtered	Filtered	Filtered	2216.5	3127.99	3784.98	Filtered	Filtered	Filtered	Filtered	Filtered	Filtered	Filtered	Filtered	Filtered	1	Filtered	736.396	Filtered	Filtered	Filtered	Filtered	60728.9	134322	159144	206011	483938	240568	112898	142343	195.398
A0A0D3BDP1;A0A0D3E2V8	3416.77	4558.17	Filtered	Filtered	Filtered	Filtered	Filtered	1	3156.09	32783.3	14299	22776.2	12559	Filtered	36204.1	25649.3	13128	18359.2	12689	42591.7	19032	25019	30389.8	31814.2	23220.2	24360.2	24480.2	14378.4	15920	22536.8	13048.2	30864.4	19690.2	19034.9	14552.4	25147.5	32363.9	17581.5	20184.6	29634	Filtered	7972.7	Filtered	3521.41	1	Filtered	Filtered	Filtered	18772.8
A0A0D3BDS4	433378	316388	368932	359311	309227	392332	505658	358821	144060	293626	398927	295318	466293	230411	375991	225343	512306	525438	400985	285945	472356	378343	411047	504841	505814	559796	711254	447955	223996	559609	257129	384630	463242	586493	575062	427824	396389	358814	449574	398092	267238	273036	287759	316482	333193	382174	499165	501075	436993
A0A0D3BDV1	1362879	146227	96292.1	172495	719405	463571	82223.4	727850	98947.6	58276.6	193999	126702	199312	298816	228624	299434	180554	127025	77420.5	81398.3	104285	220525	286023	206832	266374	185012	238794	134903	200410	264163	213133	238747	172188	268931	267326	124463	343952	370893	544793	498966	227429	191946	213471	264791	647682	352402	716543	858268	145380
A0A0D3BE26	334070	240930	145862	169512	272652	275119	223053	173890	335963	274299	329708	309721	346584	373619	307363	230663	204369	212269	224903	270534	276484	242737	237414	216527	269552	149971	145870	174752	188562	233141	222848	320333	321244	321974	252092	268707	269907	247113	224075	237574	197076	116861	83050.1	389702	179823	23441.7	182779	403242	233309
A0A0D3BE55	1.15294e+06	402490	961239	686549	827217	11149076	457723	519079	3652820	2.2198e+06	530848	167307	165399	377529	150650	157860	204686	320786	422334	167638	235870	212940	324271	210108	170672	161479	602304	165804	213944	609727	3.12984e+06	279315	193576	335571	158888	139090	241449	295833	182153	193863	243607	313434	633984	458666	294000	329367	234229	578612	217506
A0A0D3BE79	344562	147664	Filtered	114123	116706	Filtered	Filtered	198224	308897	92097.7	418694	62509.9	75418	317904	131608	295996	130466	55600	47321.1	34547.2	7811.95	173625	132534	152399	300624	146132	248104	116149	183571	107365	217648	170179	98682.5	184275	64597.4	85073.6	197499	256488	51669.1	186395	93842.4	18108.7	134639	217788	293174	236825	260735	204734	72867.4
A0A0D3BE81	45615.8	72052.7	48355.5	17900.2	1288.13	28688.4	27244.6	37373.9	Filtered	Filtered	23417.1	3850.65	12449.5	2859.33	Filtered	18486.1	26247.7	18542.8	24485.6	18951.7	16307	41530.5	32011.4	24062	28552.8	20695	21334.5	20537.6	32264.7	8358.8	24333.6	26689.5	46041.3	53742	32316.4	22387.4	59484.1	67708.8	42837.4	28905	23094.1	25566.2	22402.6	33395.6	21129.8	64350.9	26947	28523.2	11737.8
A0A0D3BE82;A0A0D3D3H4	890997	1.61072e+06	1.37138e+06	898812	262349	1.02128e+06	1.04411e+06	1.018e+06	365196	100445	160956	429204	143525	533908	655862	461502	298644	385554	334582	287945	158530	126463	339741	127627	316091	577195	257953	209103	306401	604692	780060	813399	741069	448187	687333	710343	161264	455315	677460	900015	397173	599364	497378	342841	535624	229510	1.19907e+06	1.02553e+06	143000
A0A0D3BEB8	37655.9	15791.4	12899.1	12069.3	25368.8	46248.5	2268.32	16975.5	8739.48	18141.6	20125	23240.8	13972.4	32808.6	17262.3	23216.3	34885.7	16958.7	29620.2	48378.9	38776.4	47878.1	31271.8	32320	16496.3	26442.9	18001.7	9612.13	10010.3	21137.1	15307.4	41634.2	10464.7	22101.4	14311.7	16543.7	22606.8	15584.4	20395	26310.5	17309.7	9240.35	Filtered	4278.18	4528.95	7609.29	11832.6	Filtered	43166.5
A0A0D3BEC8	Filtered	Filtered	Filtered	Filtered	Filtered	Filtered	Filtered	Filtered	Filtered	Filtered	Filtered	Filtered	Filtered	Filtered	Filtered	Filtered	Filtered	18043.5	Filtered	25797.4	Filtered	Filtered	Filtered	Filtered	Filtered	Filtered	1	Filtered	Filtered	Filtered	Filtered	Filtered	Filtered	Filtered	23718.5	Filtered	6875.97	Filtered	12837.7	Filtered	254902	228250	Filtered	Filtered	186174	52681.2	168432	Filtered	Filtered
A0A0D3BEE9	1.45003e+06	922720	568869	999435	1.42568e+06	2222432	374974	1.43377e+06	533165	184677	702035	290643	295887	670542	210644	534139	296390	261054	216758	170379	280179	435710	439996	389596	594487	351621	459545	330064	791281	273121	937517	812654	371589	545048	375149	232296	707744	720013	578318	890745	820478	555578	740017	1.06261e+06	714948	968752	656514	911402	281043
A0A0D3BEG7	22517.2	36059.8	30310.8	31548	Filtered	Filtered	26635.7	Filtered	7578.97	23351.4	47199.8	24834.7	31303.4	30424.1	22583.3	26738.8	26111.4	26739.5	23768.7	25560.3	18125.5	19259.6	25935.9	35849	32276.3	21839	28194.3	30438.8	11167.2	27528.7	11275.8	17176.7	32195	35955.6	26661.3	32324.9	33802.3	30176.2	30473.8	20731.4	42010.6	24420.9	Filtered	Filtered	41652.4	Filtered	25257.9	57402.1	34144.2
A0A0D3BEK1	288654	77312.6	246164	255418	338882	459504	231601	172521	105152	24528.1	38841.6	48199.7	37045.2	270474	47925.5	66432.5	31686.8	52740.9	21258.3	37092.1	49406.5	33001.3	42220.3	37235.3	102756	63180.3	73351.6	110091	87362.6	98827	52570.9	107195	60017	13831.4	69718	16573.8	39921.6	9837.92	25899.1	28098.2	155787	31468.8	30639.5	55777.6	224279	25005.8	109389	411710	7056.04
A0A0D3BEK4	147805	77137.4	71751.2	108692	95435	Filtered	68272.6	124820	52388.4	36733.1	27239.5	39710.5	41985.7	34560.3	40179.4	27834.7	33211.4	27518.9	32545.8	20440.7	31051.5	22203.3	27758.9	27500	32796.9	20377.8	26463.4	Filtered	18353.3	27018.5	21972.8	67951.5	22194	27098.7	20192.8	30301	38827.1	39578.9	34356.2	24041.9	96646.3	59378.9	127508	92397.4	131333	160398	95444.9	124822	56216.4
A0A0D3BEL0	198458	403872	195663	518638	205690	561146	241973	433241	172335	85191.8	125200	76087.7	71973.6	190049	92639.2	183639	215017	110361	128586	60512.4	136640	260555	191022	202915	240848	106568	160169	122130	173999	107374	216510	248584	116030	138048	158538	51669	178512	161816	131263	227729	329912	178017	373566	439756	347923	388588	365476	450442	156562
A0A0D3BEN0	179268	49123	40708.5	90867.3	38145	164544	109672	137540	52199.3	22599	57382.8	28748.1	54221.7	65221.9	38635	39896.9	49107	39341.5	36247	35791.3	28877.2	46333.4	42889.5	49474.5	70494.1	37451.2	49595.5	50173.9	58524.9	40486.9	47564.1	41346.5	39908.9	54196	32315.4	54491.5	56543.1	78677.8	81139.6	48188.4	83253.4	101795	79075.6	142631	140607	88134.9	143182	72133.1	74928.1
A0A0D3BET2	55849.9	129383	30983.5	51259.4	4961.54	21018.9	63906.8	142357	112024	51256.8	88128.8	33521.8	64116.8	106599	37100.4	42961.6	40844.8	44564.2	28048.1	35116	22431.9	25544.9	33252.2	50227.4	74899.4	15948.6	50386.3	60256.5	67406.3	22857.3	79286.1	25548.4	26084.7	76448.2	69155.8	25857.9	72985.4	90369.3	83564.4	90798.4	25958.2	20394	20303.8	39816.3	67600.6	88881.3	32265.4	56047.1	58218.7
A0A0D3BEU9	4241445	3.0403e+06	3.9834e+06	4.28009e+06	5.73533e+06	3.41531e+06	3.26517e+06	2.96242e+06	2.08421e+06	1.58548e+06	2.43229e+06	1.59624e+06	2.27771e+06	2.1534e+06	2.03073e+06	2.25966e+06	2.22368e+06	2.36099e+06	1.59954e+06	2.10013e+06	2.09621e+06	2235611	2598382	2521351	2.37149e+06	2.13708e+06	2.35901e+06	2.31915e+06	1.80155e+06	2390000	1.82072e+06	2.31532e+06	1.964e+06	2.37376e+06	2.33536e+06	2.05369e+06	2.36109e+06	2489217	2.0915e+06	2838337	3021789	2.40744e+06	2.04481e+06	2098379	2080298	2.56536e+06	2.74758e+06	2.36294e+06	2.21905e+06
A0A0D3BF07	Filtered	42006.2	Filtered	Filtered	Filtered	Filtered	Filtered	38635.1	Filtered	Filtered	31537.1	7442.94	12945	Filtered	13002.9	9301.48	26309.7	Filtered	13174.6	9627.92	9178.4	28682.8	13738.2	32289.9	33857.9	24745.7	40141.1	38192.2	18405	17376.8	21063.9	37053.9	22286.3	48217.8	17622.6	21632.9	27666.9	44448.7	65891.1	Filtered	52151.5	55034.9	75275.6	75863.1	Filtered	Filtered	66096.1	Filtered	42632.1
A0A0D3BF43	54078.1	173961	69338.9	165354	84832.1	Filtered	78143.6	91908.8	616512	157074	288825	155787	103997	261969	96406.4	147236	115737	135793	134422	139523	96397.8	179589	105312	180176	250403	143985	218720	232106	178391	67849.8	190400	186305	224901	280565	219476	155444	242898	250998	174184	244172	121145	71525.5	101980	193595	122934	134400	94843.4	157603	95341.6
A0A0D3BF55;A0A0D3E252	Filtered	Filtered	Filtered	Filtered	Filtered	93738	Filtered	Filtered	Filtered	22128.3	Filtered	Filtered	Filtered	Filtered	Filtered	Filtered	Filtered	Filtered	Filtered	Filtered	Filtered	Filtered	Filtered	Filtered	Filtered	Filtered	Filtered	Filtered	Filtered	2000.87	51265.9	Filtered	Filtered	Filtered	Filtered	Filtered	Filtered	Filtered	Filtered	Filtered	Filtered	Filtered	Filtered	Filtered	Filtered	Filtered	Filtered	Filtered	Filtered
A0A0D3BF65	Filtered	19518.5	10284.8	14375.2	38680.7	70261.6	Filtered	325419	11431.4	Filtered	76525.3	50019.9	50078.1	Filtered	52489.8	119186	112069	41841	29876.2	52458.3	35521.3	102553	109399	77077.2	79080.3	44628.5	67360	87793.7	98699	69750.4	Filtered	110889	17498.6	110602	Filtered	38554.3	35335.8	102413	Filtered	Filtered	51250.1	141718	139506	Filtered	130689	41931.4	155732	162643	42086.9
A0A0D3BF67	364695	287091	158334	342919	124484	200427	110367	381983	36170.6	82403.5	125671	123847	100817	119244	82382.5	120186	102758	100171	96390.3	129611	83654.9	107920	167944	105980	106559	51836.9	110083	120257	69135.2	72813	86514	41265.9	72533.7	156396	136539	132872	90756.5	145575	164340	149337	162631	72322.2	134225	145815	130627	229651	342839	199940	144457
A0A0D3BF70	147029	209906	132647	145482	158342	221579	120250	264686	640704	171914	254206	165037	147395	343555	107589	211967	114181	71626.3	74257.2	98265.7	97824.1	144787	126047	139256	228561	92114	120783	133918	227749	89906	182982	172626	101539	140675	149954	110924	167258	193771	159216	191058	182158	120780	214433	244169	216524	219575	277149	309543	85104.7
A0A0D3BF77	362861	169471	500749	230721	489939	328484	399744	343449	890677	372650	918718	556054	510411	2188972	634824	804796	426806	399077	553468	417748	372079	734117	612271	452240	679815	717672	538418	883113	557842	678081	602194	434102	1.42516e+06	307189	621843	247361	326121	444748	452199	803587	327549	251807	358602	297008	493531	392343	402700	1.31732e+06	374015
A0A0D3BF86;A0A0D3E244	82403952	53263648	23293158	48490192	39038036	62949020	24858986	66163316	42607936	12980673	34035316	16556377	20006012	39371800	18766460	38081388	27873376	17915638	16468105	15477076	17967144	33818372	29624266	31633728	46538652	25170350	38425548	31371352	35551184	26495794	36051124	51482760	17021806	39728684	34132928	13901947	37791060	41647552	30094022	36049072	30957102	36796596	62559532	61567172	68918280	64950792	63598684	89187792	23491238
A0A0D3BFF6	85642.5	76175	136599	52081.2	454104	176301	385721	Filtered	213205	405537	311825	396774	394387	142493	288011	163488	206292	577730	543427	704174	592965	208430	217631	394941	222498	468842	299317	332008	127972	433959	141808	182227	631324	321891	362944	674846	299622	246209	245032	254882	86918	134718	58316.5	89707	33660.7	109085	67470.4	24786.6	464943
A0A0D3BFH9	180711	89120.1	68588.1	156906	Filtered	Filtered	44352.3	193695	98901	142575	239852	136058	174300	201923	134206	222209	257604	182086	135657	193860	197617	233956	291663	260255	268676	172572	245581	232524	152923	193383	166902	281482	120882	255641	201426	150179	273040	244536	246953	285552	108840	108895	95149.8	126810	177588	273916	177388	209042	256886
A0A0D3BFM5	98603.2	105279	94653.4	149201	213663	276294	73500.4	136614	54049.3	27068.6	90655.2	60300.6	53108.1	69905.3	43068.9	71793.1	32686.1	35963.2	34466.3	93810	29819.2	40602.6	38117.1	66119.8	54053.6	28990.1	45112.7	45738.7	52835.5	51176.3	50305.8	50388.7	52223.8	46049.8	46889.2	37562.2	69309.4	76575.4	46051.8	71958.9	81623.7	79805.5	68421.3	79654.9	98706.5	68406.2	122613	142517	31093.1
A0A0D3BFP6	262456	286292	70807.9	258693	97504.7	Filtered	86117	225898	Filtered	19347.7	18273.8	3710.73	Filtered	10440.6	Filtered	Filtered	Filtered	6317.72	13258.2	Filtered	Filtered	5509.54	Filtered	20529.7	29437.3	19320.7	46410.6	25699.3	47656.2	1	Filtered	Filtered	Filtered	32334.5	3575.42	18340.2	23624.4	43675.6	Filtered	5038.92	65215.4	96716.8	200945	284491	284721	260036	199762	234645	27412.1
A0A0D3BG01	305860	244164	316785	393999	320027	690364	346350	169844	147945	205495	92959	182773	275939	375811	395594	248255	139130	123373	190270	173293	150501	63518.1	168255	152705	63369.3	120017	74322.7	132124	82064.2	128898	282265	100907	196425	93573.1	252826	290435	75528.7	362360	129612	168033	247229	230099	80892.2	275483	158718	155149	118159	187417	191271
A0A0D3BG54	Filtered	29068.6	Filtered	Filtered	Filtered	Filtered	Filtered	Filtered	3681.65	78875.4	104071	63924.9	160517	Filtered	74333.4	106301	108359	73735.7	114079	65889.2	140514	92432.8	130564	122470	98864.1	84695.9	34585.3	67525.3	27107.3	132896	59644	47005.4	88334.7	55414.7	56770.4	134263	171809	83394.6	64978.1	33442	43889.2	26105.2	Filtered	Filtered	Filtered	Filtered	Filtered	Filtered	85839.2
A0A0D3BG61	251017	232205	137586	154465	165078	401738	102267	279568	107021	83595.6	278093	96221.3	99091.8	163457	131386	131367	132965	95212.8	115284	81942.7	95933.7	127585	128510	98945.2	101896	152285	101198	149416	106565	108727	134588	80804.8	161981	93358.3	155799	77707.4	181452	115980	137119	187472	78465	77629.9	145886	112811	198036	135670	173358	172802	166960
A0A0D3BG62	Filtered	Filtered	Filtered	Filtered	Filtered	Filtered	Filtered	Filtered	100880	19455.8	52880.5	12404	29186.9	47113.5	21811	46587.5	8482.43	35866.9	11468.7	3207.17	12262	19359.5	15872.7	14909	42535.1	36195	33712.4	33545.7	41566	53405.3	66668.1	39030	30691.7	18933.4	47653.7	22033.3	25894.1	57629.5	35348.2	28495.6	Filtered	Filtered	Filtered	Filtered	Filtered	Filtered	Filtered	Filtered	25769.5
A0A0D3BG77	26004.4	15595.9	12814.3	15884.2	16666.9	25529.5	10949	20041.6	Filtered	1	Filtered	2745.07	Filtered	1	1	2951.37	Filtered	1	1	Filtered	1	1	1	Filtered	2403.12	1	2088.22	Filtered	1	505.09	1	1	2976.09	4725.98	4415.01	1763.16	6935.58	4329.99	4317.84	15188.4	12288.1	13685.8	14740.5	5143.67	22180.2	16551.7	Filtered	22472.2	6884.33
A0A0D3BGF3	Filtered	Filtered	8555.62	Filtered	3258.21	Filtered	Filtered	3828.93	12578.3	5968.39	Filtered	Filtered	2433.49	Filtered	2691.16	Filtered	Filtered	1917.29	1912.9	Filtered	2916.29	Filtered	Filtered	1	Filtered	3586.49	1839.69	2302.82	1237.07	3221.48	Filtered	Filtered	13496.7	4504.15	5835.15	4808.85	Filtered	3880.62	3379.98	Filtered	4042.4	19427.3	7857.66	13235.4	4723.07	9981.33	7655.96	Filtered	6261.73
A0A0D3BGJ5	24741682	11588357	7.67811e+06	16639061	11216144	17040406	6.01488e+06	18719306	3.97986e+06	3.31826e+06	7176113	3.9945e+06	4.49387e+06	10266023	4589459	7764532	6.4811e+06	4.02953e+06	3.21597e+06	4293225	4785126	8817314	8.25998e+06	7.45284e+06	9707516	4.44424e+06	8471933	5142466	7990375	5383565	8303872	11704806	2.8407e+06	8503786	6995859	4121040	8880653	9229882	7270473	10719412	7.38771e+06	5.46334e+06	10955994	8884143	10807425	11065803	14043812	16795522	8.05251e+06
A0A0D3BGL7	23149.7	78861.2	218616	321027	28465.8	Filtered	203094	69483.7	74320.2	92557.2	129629	100549	50620.6	Filtered	47834.1	23623.3	19923.6	70260.1	118517	52264.3	50072.3	21876.1	18254.4	16472	126486	165002	21255.1	49510.3	23367.9	47869.5	30085.2	47450.4	197162	154685	Filtered	189034	36082.4	61624.6	114591	105198	155899	126794	83556.3	162998	20308	48848.5	46718.5	Filtered	112442
A0A0D3BGL8	41847.7	124327	232953	200680	Filtered	181282	103604	66638.1	139327	70484.8	102764	76356.3	26689.4	48967.1	31387.9	30970.1	12067.8	20192.5	64289	11679.8	30144.7	30023	23487.3	15086.9	130703	73117.2	23364	67390.4	31329.4	12061.9	21157.2	26419.6	78039.5	133003	65364.9	86414.7	42143.2	78922.7	40973.1	20441.4	157587	147635	159098	185686	40125.6	67496.4	61130.9	66050	75736.4
A0A0D3BH00	Filtered	Filtered	Filtered	Filtered	Filtered	Filtered	Filtered	Filtered	109940	65615.4	Filtered	Filtered	Filtered	Filtered	Filtered	Filtered	Filtered	Filtered	Filtered	Filtered	Filtered	Filtered	Filtered	Filtered	Filtered	Filtered	Filtered	Filtered	Filtered	Filtered	62841.3	Filtered	7952.91	Filtered	Filtered	Filtered	Filtered	Filtered	Filtered	Filtered	Filtered	Filtered	Filtered	Filtered	Filtered	Filtered	Filtered	Filtered	Filtered
A0A0D3BH14	4457.01	Filtered	1	1.06184	1.12403	Filtered	Filtered	1	68177.7	14550.8	Filtered	10959.9	11038.8	1	7242.25	1595.68	Filtered	14266.3	21511.1	19216.4	24906.4	Filtered	Filtered	2287.06	Filtered	14123.1	2284.95	1	3292.95	Filtered	479.3	Filtered	17882.1	Filtered	1	17790.5	28599.5	Filtered	611.2	7663.8	1.24821	8557.51	Filtered	1	6762.2	Filtered	1.06978	1.714	23318.8
A0A0D3BH88	655907	409917	1.267e+06	603078	1064317	1.06497e+06	864967	583285	591003	279742	418454	304179	335785	410767	357084	262776	286086	315639	371922	470928	416794	806054	437399	361877	592212	295622	535379	260156	375932	751675	594038	984977	195993	543244	480380	437061	313737	682535	508218	740302	993405	902185	270605	209680	507129	329648	273009	520002	495731
A0A0D3BHA7	361557	52908.4	53468	96267.6	173483	50852.1	130050	3239.61	53436.9	25036	171611	47556.8	115354	138351	105144	14099.6	20339.5	65380.9	46113	27537.3	35759	62795.1	107415	82761	94770.3	41521.9	75578.9	26529.4	53855.9	35066	51744	54167.4	130667	120095	139908	97434.9	82873	22832.2	154701	110702	10902.7	50975.3	18539.9	6268.79	36888.3	1.03347	22991.6	52355.6	61060.5
A0A0D3BHF9;A0A0D3C8C6	169422	53390.2	133508	139926	200363	1.10938e+06	142495	184971	497196	405512	Filtered	173812	136446	131414	132250	52134.3	129716	133840	220484	240316	184876	76108.9	150281	160606	100650	97389.7	125110	123633	89979.2	166523	498241	106051	45060.8	59180.5	87499.5	158701	58487.1	100606	70320.5	89304.3	169890	152269	111816	158727	131905	149090	118264	141977	186041
A0A0D3BHQ4	15303474	15093985	6.14681e+06	11182193	7004764	13739103	4.50061e+06	13314437	6614478	3.00132e+06	5.29216e+06	3.84114e+06	3.86035e+06	6033485	3.22364e+06	6.71333e+06	5454465	3.76419e+06	3.55279e+06	3.7025e+06	3.99387e+06	5969351	6089199	5.55238e+06	8.09521e+06	5175937	6927616	4764007	7050348	5.43365e+06	6890126	11362852	2.71504e+06	8368244	6369483	4238711	8.3319e+06	7091630	6.68899e+06	9699066	7.95066e+06	7089997	10475654	9774627	11732782	10922497	14887516	17003046	6.90268e+06
A0A0D3BHT5	Filtered	Filtered	149138	Filtered	Filtered	2.02336e+06	Filtered	Filtered	1.31599e+06	640168	6757.13	Filtered	1	Filtered	1532.21	Filtered	Filtered	1	Filtered	Filtered	Filtered	Filtered	Filtered	390.947	1	Filtered	18998.5	Filtered	Filtered	106909	1.47029e+06	Filtered	1	43038.9	Filtered	Filtered	1	Filtered	1	Filtered	Filtered	Filtered	Filtered	21445.4	Filtered	21250.2	Filtered	Filtered	Filtered
A0A0D3BHU0	Filtered	Filtered	Filtered	13379	Filtered	Filtered	Filtered	Filtered	Filtered	13404.5	Filtered	6568.63	9709.98	Filtered	12765.2	11832.2	11144.2	16671.1	10527.7	8345.7	15607.7	11200.1	9707.35	3780.99	Filtered	18245.9	Filtered	19914.6	5905.92	25718.4	10046.2	Filtered	9987.42	10759.4	23786.2	23532.7	8283.27	8110.84	18965.5	16621.5	10506.4	Filtered	Filtered	Filtered	Filtered	Filtered	Filtered	Filtered	16935.5
A0A0D3BHU5;A0A0D3CGY3	Filtered	Filtered	Filtered	Filtered	Filtered	Filtered	Filtered	Filtered	131431	Filtered	Filtered	Filtered	Filtered	Filtered	Filtered	Filtered	Filtered	Filtered	Filtered	Filtered	Filtered	Filtered	Filtered	Filtered	Filtered	Filtered	Filtered	Filtered	Filtered	Filtered	78478	Filtered	Filtered	Filtered	Filtered	Filtered	Filtered	Filtered	Filtered	Filtered	Filtered	Filtered	Filtered	Filtered	Filtered	Filtered	Filtered	Filtered	Filtered
A0A0D3BHV4	36620.2	23321.7	8181.11	28778.5	9924.74	Filtered	26121.5	12991.6	40915.5	23969.9	23061.6	24937.4	30479.8	20054.6	54834.6	23319.5	37616.5	43237	33544.8	55308.1	49742.6	28952.4	35822.5	46292.4	27896.3	28731.5	32994.3	35412.1	15511.5	46471.5	36394.3	32786.4	21020.4	866.461	22091.3	24921.9	5624.69	14632.9	Filtered	11396.3	12443.9	17814.6	22586.7	31525.4	9523.31	22535.7	17339.2	19949.9	29256.2
A0A0D3BHW0	33694.8	97428.6	25913.9	1.3251	Filtered	Filtered	Filtered	186812	680649	32040.2	100897	Filtered	Filtered	Filtered	36480.1	63046	59601.4	51391.8	47609	97032.4	57978.3	93539.1	129667	130251	149674	125961	77302.9	42513.1	162350	44274	64335.1	170288	47010	96467.1	41599	55715.8	117782	35702.1	24746.8	Filtered	Filtered	141134	194093	245119	Filtered	244083	16247.9	205001	173729
A0A0D3BHZ5;A0A0D3D6U2	10030571	5644602	5.58104e+06	8516624	8032629	7.03574e+06	6251971	6324154	8599723	4.78852e+06	6.15716e+06	3.62028e+06	5.01808e+06	5.97752e+06	3.17887e+06	4511468	4.84257e+06	4.10219e+06	3.7605e+06	5.00166e+06	4571520	4.84447e+06	3.76933e+06	5.90813e+06	7.75663e+06	5.09411e+06	6.87655e+06	5.9767e+06	5235715	5.2126e+06	4811041	7.18262e+06	4972991	6.27097e+06	6.85882e+06	4764718	6.75504e+06	6926537	6891452	7.31538e+06	5289529	5512019	8458789	10037900	10242938	9787870	8578907	10503600	5.03952e+06
A0A0D3BI34	369154	171060	97317.4	166965	133008	142971	100834	230495	257977	89667.3	167545	116458	89023.5	143233	85546.1	198957	92454.7	67807.1	68424.3	82273.5	64425.9	110500	98302.4	96555.2	138907	67219.2	99555.9	81183.2	145347	55387	110496	176376	83237.8	101856	94700.2	60072.2	153103	210390	104412	141386	79317.5	95522.2	44110.3	124592	109087	60877.1	77828.1	108066	64978.2
A0A0D3BI87	1242351	580950	480238	638061	720718	798659	388784	907834	46638.4	75387.7	66822.3	127152	108803	601802	164862	226133	63266.8	85952.1	67851.9	90060.4	59159.8	64481.9	127269	31104.6	105088	75530.7	74700.9	421025	179976	183643	54059.7	132421	40606.2	40379.3	215584	37908.8	23734.5	44382.5	38009.6	120168	434956	70344.9	382118	324847	826605	1.29808e+06	886730	1.35473e+06	33555.6
A0A0D3BID4	251184	93823.2	139812	239633	170067	506932	140756	297329	75651.6	85524.4	151803	80954	102525	117194	96827.1	125033	61800.1	44091.4	31962.8	46403.6	38901.7	77827.2	85657.2	74466	100281	41283.7	46134.8	64781	90123.7	45043.8	85614.3	94111.2	35202	117023	70483.7	53822.5	124174	108827	97173.4	83627.3	204995	60344.1	83935	109956	141999	275490	188469	277719	64623.1
A0A0D3BIE0	781556	490709	214402	406397	341344	466237	663479	655045	203758	160249	312224	115467	89285	308084	140323	106084	226974	193390	170132	169709	81201.9	284261	131928	116775	350542	210225	219055	380839	202548	84311	140194	260958	239048	207034	414841	94609	146299	226055	387712	320841	367383	349187	406898	586578	475261	284429	241083	678836	163004
A0A0D3BII0	Filtered	1	16455.8	Filtered	Filtered	Filtered	19147.8	Filtered	6134.43	9906.54	11584.4	17334.6	24874.7	23345	16028.4	8159.41	22089.6	19155.4	23586.8	31887.1	24190.2	17851.7	22327.4	23565.3	15511.9	6470.08	11334	Filtered	7857.7	Filtered	9344.32	13110.6	9054.03	11197.3	6463.29	11240.5	12931.2	8617.5	8062.79	14967.4	7570.38	Filtered	Filtered	Filtered	10456.9	Filtered	Filtered	34261.5	12349.1
A0A0D3BII7	190228	186456	137647	156580	298037	367616	188541	326873	596949	59532.3	120561	166519	170982	288621	90056.1	133381	141805	151103	173796	157597	146830	216892	198429	113602	158333	149092	124814	252914	234150	114671	173117	156870	90675.6	87946.1	230279	144618	137846	192053	130214	113607	241778	200630	247540	253315	370646	389696	304145	321024	75395.5
A0A0D3BIM3;A0A0D3D695	Filtered	Filtered	Filtered	Filtered	Filtered	Filtered	Filtered	Filtered	Filtered	2959.19	Filtered	Filtered	Filtered	Filtered	Filtered	Filtered	1	2063.29	8522.45	10347.7	Filtered	Filtered	Filtered	1	Filtered	Filtered	Filtered	Filtered	Filtered	Filtered	Filtered	Filtered	11844.7	Filtered	Filtered	12448.5	Filtered	Filtered	Filtered	Filtered	Filtered	1	Filtered	Filtered	Filtered	Filtered	Filtered	Filtered	Filtered
A0A0D3BIS3;A0A0D3CEG1;A0A0D3D640	102408	57979.4	122860	87432.5	122100	140023	114872	100364	243555	79951	110481	121144	98549.7	133426	89557	108979	51055.4	55310	77347.1	58076.9	44824.6	54662.7	47741.5	34518.8	41744.3	45696.7	43129.5	83629.3	65171.4	34191.3	56410.4	43601.7	92210.8	29282.1	63508.8	59835.9	68877.2	63351.4	38641.8	68582	130298	128863	58285.3	69397.5	97621.7	Filtered	93458.5	156568	70997.7
A0A0D3BIU2	309626	204368	150402	290910	423729	176717	164207	334192	65620.8	104157	149963	94561.1	118423	124572	111278	135693	119419	117982	73944	94155.8	63849.7	114543	114323	112506	132675	109611	137217	125155	91690.8	93063.1	118037	125338	115021	153632	151260	101117	163567	203641	162287	177985	212624	192569	244649	244632	211947	246426	226571	333291	124841
A0A0D3BIV6	378310	300035	241789	294082	329478	330222	296781	315284	402281	153074	256626	140773	193915	255137	205987	196413	190749	195518	178900	174538	169298	242035	243293	218590	360683	230774	249092	286987	239328	311617	306770	342997	194803	183265	129500	174883	170372	211322	247385	165008	357932	332212	344695	296309	380655	189120	323596	504646	164734
A0A0D3BIW4	Filtered	Filtered	1.15934	Filtered	Filtered	Filtered	Filtered	Filtered	25591.4	11164.3	1	6465.01	5365.52	Filtered	11151.3	1	1	7368.53	15138.5	9120	21670.7	Filtered	Filtered	1	1	Filtered	Filtered	1	1	9980.92	1	Filtered	1	Filtered	1	14622.5	Filtered	Filtered	1	1	5103.94	Filtered	Filtered	Filtered	Filtered	Filtered	1	Filtered	16916.1
A0A0D3BIY9	Filtered	Filtered	Filtered	Filtered	Filtered	65563044	27447226	Filtered	97984072	17454808	43883212	18259106	17363702	Filtered	Filtered	41917540	28597284	14787485	Filtered	13573655	19679560	37242368	32955656	30088070	39098936	26997496	42972928	25406534	40972336	Filtered	30597616	55945676	17287492	5624672	Filtered	16725094	39127964	43068244	33148638	42647456	Filtered	33435870	62823432	Filtered	Filtered	60589504	63466324	Filtered	32025092
A0A0D3BIZ0;A0A0D3CEM3	1.11717e+06	451914	1.19519e+06	577303	828432	11005289	803632	1.15613e+06	8623550	5138771	510308	437278	889859	758670	484832	803518	513773	453373	717436	558365	1.15864e+06	649853	580757	650264	444622	656156	654038	380343	640437	2.11559e+06	4.10457e+06	1.44848e+06	546893	808117	611727	477500	1.36528e+06	735156	922223	892464	629647	717619	632508	865922	1.0851e+06	1.22746e+06	1.09383e+06	1.31811e+06	656060
A0A0D3BJ21	293110	171405	414144	322066	564170	2121940	691297	413951	1.20972e+06	295256	109468	209835	187723	216671	234582	84344.9	177228	227917	309599	302439	277620	88298.9	206706	181461	147403	260342	181234	109335	156042	301500	255737	47213.5	425577	199520	216907	173937	123446	156466	174235	194594	424442	568034	346277	501691	403479	373438	274907	327364	77176.3
A0A0D3BJ43;A0A0D3CEV3	Filtered	Filtered	220537	Filtered	Filtered	1.25586e+06	Filtered	Filtered	1.20075e+06	524781	Filtered	Filtered	Filtered	Filtered	Filtered	Filtered	Filtered	Filtered	44541.2	Filtered	Filtered	Filtered	Filtered	Filtered	Filtered	Filtered	Filtered	Filtered	Filtered	66992.5	923195	Filtered	Filtered	51282.2	Filtered	29874.6	Filtered	Filtered	Filtered	Filtered	Filtered	Filtered	Filtered	Filtered	Filtered	Filtered	Filtered	Filtered	39592.5
A0A0D3BJ48	Filtered	Filtered	Filtered	Filtered	Filtered	Filtered	Filtered	Filtered	Filtered	12054.2	Filtered	Filtered	12403.9	Filtered	Filtered	Filtered	Filtered	11200.4	Filtered	13189.1	Filtered	Filtered	Filtered	Filtered	Filtered	5022.46	Filtered	Filtered	Filtered	Filtered	2141.31	Filtered	3759.1	5178.1	Filtered	Filtered	Filtered	3714.53	1997.36	Filtered	Filtered	Filtered	Filtered	Filtered	Filtered	Filtered	Filtered	Filtered	Filtered
A0A0D3BJ49	163831	70087.3	135743	98110.4	131492	96965.9	192143	94903.3	51560.8	65163.7	115238	84383.4	88133.4	81850.8	88958	88633.6	69301.7	75305.8	66105.6	79374	65306.9	43837.9	73649.3	70327.7	87026	73605.5	90203.6	66739.6	53942.9	71406.7	50177.2	91691.7	85888.4	73084.1	92960.5	97175.2	49664	87666.9	79141.4	70117.5	95920.3	93058.5	22340.9	109143	102548	1522.63	77763.6	173332	29012.5
A0A0D3BJ55	Filtered	Filtered	Filtered	Filtered	Filtered	Filtered	Filtered	Filtered	Filtered	Filtered	Filtered	Filtered	Filtered	Filtered	Filtered	Filtered	Filtered	Filtered	1405.24	Filtered	543.343	Filtered	Filtered	Filtered	Filtered	Filtered	Filtered	Filtered	210.841	Filtered	Filtered	Filtered	Filtered	Filtered	Filtered	Filtered	Filtered	Filtered	Filtered	2599.12	Filtered	Filtered	Filtered	Filtered	Filtered	Filtered	Filtered	Filtered	Filtered
A0A0D3BJ59	936388	1.09368e+06	779523	1.31064e+06	1.01328e+06	1.2707e+06	377724	1606773	846793	458109	1.43985e+06	755758	809182	606636	626392	918473	727270	692036	506146	468451	424253	786818	797417	816436	1.21106e+06	979940	1179570	496621	1.1151e+06	716739	442051	1.02502e+06	762652	1.37155e+06	635761	673902	1.03403e+06	1.17285e+06	554094	1.12984e+06	689371	679201	695625	1.02643e+06	708318	490598	628881	660431	438980
A0A0D3BJ86	15505.1	28892.6	7773.2	12877.4	Filtered	Filtered	Filtered	12691	42016.9	14125.9	12565.3	12495	15437.2	10268.5	10472.9	14376.3	9520.33	8013.46	17199.6	11838.7	11698.8	15916.1	15864.2	11124.4	11671.6	7795.96	17359.6	6171.31	13264.3	13165.7	12841.5	17970.9	5456.16	17201.5	14545	27631.6	13501.1	18914.7	22578.2	20745.8	22556.9	11216.6	13906.6	15227.9	26142.5	13262.6	30314.2	32697.7	1929.04
A0A0D3BJ90	36279.3	24927.1	57897.4	44226.9	61115.7	39543.8	76321.1	7201.01	57225.6	27795	47080.8	48927.9	39549.5	44826.5	46162.3	45068.7	29166.2	31130.2	32063	44378.2	31872.8	32648.8	28449.1	40978.7	43603	39901	29109.8	38914.9	29685.8	31918.7	24450.8	23882.9	82285.9	15418.2	52941.6	31168.8	32793.3	28975.7	24714.9	39273.4	18627.4	35426.6	7838.63	22483.6	22571.6	13751.4	9761.22	79480.9	5249.39
A0A0D3BJ95	452015	367075	255038	393182	385848	475760	226082	524589	327721	383063	649080	399147	334006	728656	227451	352613	298359	234117	221925	237855	208941	351840	284715	329426	539977	258867	372841	402982	455595	170671	447843	472714	273404	604695	430366	279589	472528	673681	438769	626053	363918	195058	242361	454408	435145	377029	474046	526286	268219
A0A0D3BJ97;A0A0D3DIG7	203092	54181.4	195565	100704	128232	94586.1	136801	88502.6	35228.1	21205.9	17933.6	65597.6	37172.9	90054.3	85648.3	70279	42232.5	37689.6	45863.6	24007.1	55855.1	97177.1	58421.8	58766.6	41589.7	77661	98753.3	76924	42868.7	52331.7	21545	62751.6	44185.5	24454.5	45601.8	21138.5	55899.3	42389.2	27991.5	24900.2	79265.9	108093	73960.1	43966.9	42921.2	46475.3	50042.1	44134.8	29865.5
A0A0D3BJB3	4.16893e+06	3736182	4461729	3.40686e+06	5243609	8.02093e+06	2888984	3.34423e+06	4864346	2.46226e+06	1.86069e+06	2.21642e+06	2.75784e+06	2280282	2.5616e+06	2301471	2.18162e+06	2.62689e+06	3.14451e+06	3.46899e+06	3.90558e+06	2631597	2.46288e+06	2396915	1.87075e+06	2462200	2.05496e+06	2.35881e+06	1.8142e+06	3.44944e+06	2.73901e+06	2.58307e+06	2.33695e+06	2.20263e+06	2.33542e+06	3.33209e+06	3764650	2.20037e+06	2105822	3.08166e+06	4429425	3.73702e+06	2.3306e+06	2102679	2.91846e+06	3.23765e+06	3.69178e+06	3822102	3871488
A0A0D3BJE8	66451.3	72178.6	9219.45	112852	Filtered	Filtered	Filtered	82692.6	32332.4	Filtered	44136.9	29832.5	31721.7	64007.5	11323.7	36847.1	25608	13998.9	2347.92	Filtered	6113.74	34995.6	27817.4	34663.7	30920.1	Filtered	12862	4551.76	48625.1	Filtered	11902.7	58675.4	6304.89	20819.8	23076.5	9142.55	38197.5	38423.2	50304.6	69118.9	Filtered	Filtered	60344.3	76182.2	22695.1	68581	33191	58117.5	14048
A0A0D3BJE9	901688	1.03295e+06	886785	1.10587e+06	921123	1.17545e+06	748952	1002387	2.4486e+06	1.29659e+06	2.57307e+06	1.89834e+06	1.35544e+06	1.85793e+06	1086536	1.94364e+06	1.6393e+06	1.66037e+06	1578964	1.60571e+06	1.33087e+06	2.00007e+06	1.60817e+06	1.97122e+06	3.20665e+06	2.02777e+06	2.22391e+06	2.75211e+06	2.00724e+06	1.73032e+06	2.18685e+06	2304785	2.00475e+06	2781742	2.15359e+06	1.71157e+06	2.55912e+06	2.22006e+06	1.90496e+06	2380625	1.1602e+06	1.05291e+06	1058136	1243675	1.11964e+06	1.06988e+06	995504	1.20575e+06	1.70561e+06
A0A0D3BJI6	56074.2	112316	111081	57864	143234	135313	344600	70235.9	72271.6	61197.3	62644.6	32613.7	85166.9	50005.8	43318.6	21179	33783.9	64596.5	62792.5	64302.2	36682.8	37087.1	30858.7	38789.4	48117.1	47713.7	56786.9	44920.1	63278.5	36944.1	52605.8	12990.2	83431.7	36799.1	30710.7	102924	43721	63109.8	42510	52063.2	143675	117777	103554	123801	117213	37242.8	86083.1	203749	84440.3
A0A0D3BJI7	Filtered	5736.82	Filtered	Filtered	Filtered	Filtered	4166.05	Filtered	Filtered	Filtered	Filtered	Filtered	934.141	Filtered	Filtered	1502.38	Filtered	919.025	2621.63	Filtered	Filtered	Filtered	1715.02	Filtered	Filtered	1020.66	Filtered	Filtered	Filtered	Filtered	Filtered	Filtered	2252.25	Filtered	Filtered	Filtered	Filtered	Filtered	Filtered	Filtered	Filtered	Filtered	Filtered	Filtered	Filtered	Filtered	Filtered	Filtered	Filtered
A0A0D3BJQ7	Filtered	Filtered	Filtered	Filtered	Filtered	Filtered	Filtered	Filtered	76125.6	Filtered	Filtered	Filtered	Filtered	5650.17	Filtered	Filtered	Filtered	8411.3	Filtered	6781.8	Filtered	Filtered	Filtered	6009.32	Filtered	Filtered	1735.72	Filtered	Filtered	Filtered	Filtered	Filtered	7232.45	Filtered	Filtered	6733.66	5231.27	Filtered	Filtered	7721.81	Filtered	Filtered	Filtered	Filtered	Filtered	Filtered	Filtered	Filtered	Filtered
A0A0D3BJQ8	5386.41	83381.1	44066.5	59695.3	59578.1	49832.6	59141.5	53194.8	146154	39792.5	60791.4	42771.2	17185.3	68622	29079.6	36448.2	13269.1	11028.6	34260.1	31934.2	29575	41118.1	35965.5	37982.5	34001.2	17099.6	35.1994	27401.2	27392.7	4093.19	23670.8	Filtered	29285.3	44189.4	51723	41005.6	37582.6	47801.6	38517.2	38192.6	44020.6	11689.1	17673.5	68369.1	75843.5	61962.3	55415.1	18104.3	24889.7
A0A0D3BJT1;A0A0D3CHD1	196356	113232	150085	170860	158587	Filtered	141361	192443	72726.8	91793.2	156307	84214.6	84261.2	144442	75857.9	74677.2	81342.2	76064.2	80364.7	97460.1	59877.5	95039.5	88902.9	115457	97999	80664.3	108112	98218.8	94438.5	68663.6	64299.3	81553.5	66791.2	97382.1	78146.7	58432.2	83938.5	91891.6	63464.1	92706.2	150573	137131	150788	172996	168266	195188	182661	224300	101481
A0A0D3BK51	415997	313706	146798	450365	205129	271951	463395	182010	566179	80221.4	346258	139288	156859	569421	211746	255784	270994	249889	184948	113985	115352	280742	135541	163892	385428	360842	429331	177491	418966	238592	324868	343182	270119	316749	759444	182441	312163	368031	312100	513105	239762	353966	481208	613737	229844	318210	333564	366703	204359
A0A0D3BK57	Filtered	Filtered	87650.3	Filtered	Filtered	3920998	Filtered	Filtered	1.72008e+06	1.15825e+06	1	6890.75	Filtered	Filtered	1	Filtered	Filtered	Filtered	25678.8	1	Filtered	1	1	1	1	Filtered	Filtered	Filtered	Filtered	87060.4	1.3655e+06	Filtered	54016.4	123473	1	Filtered	12071.1	Filtered	Filtered	1	Filtered	Filtered	Filtered	64701	Filtered	Filtered	Filtered	Filtered	Filtered
A0A0D3BK78	74055.7	50105.6	53670.8	95836.2	63709.2	Filtered	43040.4	97888.9	58463.4	72470.6	85057.1	59772.6	68174.8	104213	49269.5	47654.7	54135.2	52817.1	50440.5	50983	41921.2	43701.4	53860.4	63488.9	62492.1	38290.4	60348.7	59306.6	49745.6	45730.1	51315.7	57636.8	37857.3	75675.2	48600.5	47335.1	51081.4	62353.1	61701	108544	60703.7	52762.9	72662	43276.8	79632.3	95551.4	83191.3	127405	50496.9
A0A0D3BKF0;A0A0D3C0U6;A0A0D3D9B1	Filtered	Filtered	Filtered	Filtered	Filtered	Filtered	Filtered	Filtered	41013.9	45029.1	Filtered	Filtered	Filtered	Filtered	Filtered	Filtered	Filtered	Filtered	Filtered	Filtered	Filtered	Filtered	Filtered	Filtered	Filtered	Filtered	Filtered	Filtered	Filtered	Filtered	31251.7	Filtered	Filtered	Filtered	Filtered	Filtered	Filtered	Filtered	Filtered	Filtered	Filtered	Filtered	Filtered	Filtered	Filtered	Filtered	Filtered	Filtered	Filtered
A0A0D3BKH0	Filtered	16166.7	Filtered	Filtered	Filtered	Filtered	Filtered	Filtered	16023.2	77571.5	70047.6	82355.5	98948.1	13892.1	75583.4	103859	83233.1	90613.1	79099.7	97446.5	95866.5	99086.8	90363.9	91371.2	104109	100167	93757.2	101807	69450.6	118202	75606.9	134525	25429.5	36432.5	Filtered	30696.3	40495.4	40286.7	42421.4	42410.3	Filtered	Filtered	Filtered	Filtered	Filtered	Filtered	Filtered	Filtered	19851
A0A0D3BKN6	189320	157118	52696.7	166394	150504	187806	176955	203412	268626	190243	252000	191344	247008	137552	171408	207448	148940	159168	143662	163988	178001	165980	167373	186050	219416	171862	201355	167309	165219	106896	162137	203181	150493	225070	114061	209195	316181	228303	202925	226887	53505.3	145211	107763	146953	185580	56491.1	67337.2	88131.3	201888
A0A0D3BKP7	24947.6	107296	46645.4	26219	Filtered	66110.9	56088	67574	83233.3	156260	92162.6	118060	89665.1	35711.7	54083	53807.5	40228.4	74833.4	49936.2	52641.4	41253.9	31392	42210.2	44381	58628.5	55114.2	30664.8	112662	57616.7	73771.3	36989.4	44981.1	85021.7	52003.3	42639.7	90004.6	39364.2	76508.5	61272.4	43841.6	131014	45218.3	66968.9	61393.7	85508.9	144324	62201.5	99208.6	45311.7
A0A0D3BKP8	68187.1	104887	Filtered	Filtered	Filtered	Filtered	Filtered	110106	Filtered	72419.2	102176	86560.8	80473.1	Filtered	57361.2	179577	213196	75974.2	80451.5	153547	142068	160553	236413	244080	34612.1	21253.7	34841.8	70188.5	48025	Filtered	28083.7	105323	3102.93	116745	67866	56146.6	118646	115813	85843.5	Filtered	199164	97790.5	69626.6	Filtered	Filtered	203132	209391	Filtered	146472
A0A0D3BKS7;A0A0D3DF83	Filtered	Filtered	1858.16	Filtered	1669.48	Filtered	Filtered	Filtered	1	1	1	1316.5	2797.85	1	2087.12	2693.99	2477.04	4386.03	Filtered	3449.43	1	2922.49	1134.16	1	1143.3	4138.79	2821.62	5357.59	1671.73	6143.57	4192.67	Filtered	1	1	2828.9	3787.13	Filtered	2281.89	3711.74	1933.03	3230.63	Filtered	Filtered	Filtered	Filtered	1057.76	1	4373.23	1
A0A0D3BL07	1.01605e+06	594669	661215	898073	1.36545e+06	893304	909615	885530	893686	474558	781704	506844	687718	1.00933e+06	440060	776165	332206	558108	329214	387761	300667	431909	459265	396524	467341	509869	657261	763979	752598	542898	619613	514143	451998	731371	351876	451426	764857	671484	688315	832399	858455	778334	740040	900250	1.07567e+06	1.0345e+06	971995	1.21452e+06	546820
A0A0D3BL41;A0A0D3BL44	Filtered	47311.3	38558.4	Filtered	Filtered	Filtered	Filtered	Filtered	207177	85574.5	Filtered	13190.6	4431.6	32920.3	17138.6	Filtered	35287.3	15860.1	64667.8	51998.3	83077.3	65223.8	28359.7	50406	Filtered	21867.4	Filtered	6530.2	Filtered	Filtered	82733	Filtered	39334.9	4740.58	21840.8	45755.9	27945.7	22876.7	3913.49	14091.8	65963.7	27031.2	Filtered	Filtered	Filtered	45139.6	Filtered	11229.2	83602.3
A0A0D3BL75	Filtered	Filtered	Filtered	Filtered	Filtered	110301	Filtered	Filtered	102137	141395	Filtered	Filtered	Filtered	Filtered	Filtered	Filtered	Filtered	1	Filtered	Filtered	Filtered	Filtered	Filtered	Filtered	Filtered	Filtered	Filtered	Filtered	Filtered	3814.77	178667	Filtered	Filtered	2718.53	Filtered	Filtered	Filtered	Filtered	Filtered	Filtered	Filtered	Filtered	Filtered	7945.88	Filtered	Filtered	Filtered	Filtered	Filtered
A0A0D3BL76;A0A0D3DHS1	66874.2	110883	352289	17973.1	122700	1.08267e+06	117448	42424.6	492338	426384	6197.1	84135.5	142925	4298.36	142176	41594.8	84310.6	193861	275822	386526	147538	135147	34076.5	125494	31318.1	160464	69477.4	65749.7	24234	377450	479446	62476.5	117714	112305	41573.2	245298	68447.2	35018.2	32434.9	53143.8	262149	325218	44349.1	119844	46632.1	64559.9	160602	33170	400177
A0A0D3BLE6	Filtered	Filtered	Filtered	Filtered	Filtered	Filtered	Filtered	Filtered	19726.1	Filtered	1	Filtered	Filtered	Filtered	Filtered	Filtered	Filtered	Filtered	Filtered	Filtered	Filtered	Filtered	Filtered	2188.73	Filtered	Filtered	Filtered	Filtered	Filtered	Filtered	Filtered	Filtered	Filtered	1	Filtered	Filtered	Filtered	Filtered	Filtered	Filtered	Filtered	Filtered	Filtered	Filtered	Filtered	Filtered	Filtered	Filtered	Filtered
A0A0D3BLH1	744595	2.05881e+06	1.76471e+06	725276	1.89328e+06	1.95308e+06	2.14192e+06	1.86387e+06	395100	844923	665466	728844	957728	546703	895725	647699	1.28622e+06	1195215	1.10727e+06	1.15994e+06	1270200	945121	1.08924e+06	1.10912e+06	979473	1.09857e+06	1.19218e+06	1.37514e+06	598319	1135571	640315	753814	1.36632e+06	1304240	1.24151e+06	1.41944e+06	1.06847e+06	1.13317e+06	1.02368e+06	1.11647e+06	2710290	2.05396e+06	2.08867e+06	1.96903e+06	1.58075e+06	2.26062e+06	2.21261e+06	2.13507e+06	902366
A0A0D3BLL1	558978	516345	299384	527634	514254	1.26307e+06	599464	616703	388185	199405	601815	354800	633319	704632	563870	591226	594501	613753	644946	593549	702950	559679	715661	558341	493192	661872	497602	638524	156879	656404	204731	Filtered	380636	565093	775609	419386	893393	695095	540229	674762	Filtered	743568	606945	563047	320404	818082	253856	409534	507070
A0A0D3BLM5	Filtered	25965	264237	1.32248	61643.3	Filtered	43022.7	Filtered	499873	Filtered	1	121510	21954.7	51826.5	54289.2	187065	18039.4	19103.4	150070	Filtered	201566	79329.9	40493.1	64287.1	80646.7	45125.2	18723.4	35217.9	81090.5	51037.2	36816.2	63424.5	49650.1	7946.72	13113.9	28409.2	179151	65279.1	29778.6	59055.1	Filtered	51044.5	16449.1	17755.5	50350.8	339321	68657.6	1.40681	149595
A0A0D3BLQ8	711110	322024	180163	472246	222007	302505	275299	444731	1.2251e+06	37670.7	127905	58268.6	65565.9	193030	51920.9	77381.9	104028	62508	79854.7	129515	115658	107817	94667.5	74056.4	169993	70378.1	123559	111138	153564	54193.7	96395.5	149759	134435	94444.4	109307	85083.2	154307	213195	111363	95891.8	290033	190770	225946	378588	226381	299192	207884	414194	177634
A0A0D3BLT6	Filtered	Filtered	590.114	1688.68	2504.15	2468.99	737.728	602.46	Filtered	399.401	Filtered	Filtered	601.168	Filtered	681.768	Filtered	45.031	Filtered	140.203	1	160.561	Filtered	264.041	Filtered	Filtered	Filtered	221.444	Filtered	302.765	535.569	174.99	337.07	Filtered	760.686	302.249	718.958	Filtered	540.616	2038.21	682.447	609.374	552.874	841.546	433.449	396.328	1185.4	1314.93	Filtered	3374.38
A0A0D3BLU6	202037	153987	208036	203700	313699	726757	143418	228495	352129	204112	161270	199171	158017	113552	96107	233365	381138	353717	447566	510318	255871	424642	391569	345214	300400	226428	325150	291812	150404	275456	170091	168481	104347	101878	60724	221486	247926	Filtered	156402	77096.7	342728	499258	195768	317885	239259	235571	274832	316808	254374
A0A0D3BLV4	26405.2	66457.4	21111.1	22686.8	21730.1	30513.5	9006.74	36015	17149.2	17811.6	35932.7	15474.7	19099.3	53647.5	12902.5	23392.6	16217.4	9512.61	10769.2	16288.6	8334.45	33969.2	13787.1	18756.3	6889.8	6395.64	9041.14	7460.21	6349.25	1438.9	11894.1	9203.53	23454.1	26225.6	28671.9	11530.1	26454.4	37962.3	35797.5	32952.2	21677.8	Filtered	25445.6	Filtered	31657.3	31440.2	38520.2	38857.6	1726.4
A0A0D3BLW8	Filtered	Filtered	Filtered	Filtered	Filtered	Filtered	Filtered	Filtered	3610.91	39463.9	Filtered	61343.2	Filtered	57446.6	53639.9	3594.95	Filtered	Filtered	Filtered	Filtered	Filtered	Filtered	Filtered	Filtered	Filtered	Filtered	1	2869.13	13672	Filtered	Filtered	Filtered	34271.4	Filtered	Filtered	8966.15	2192.66	Filtered	Filtered	9359.34	Filtered	Filtered	Filtered	Filtered	Filtered	Filtered	Filtered	Filtered	1
A0A0D3BM58	253325	87884.5	90329.7	59152	83402.6	31177.4	136717	117809	324519	34369.4	84390.6	26462.8	48187.9	93105.6	50916.5	49709.8	105274	34007.7	56153.5	59433.1	82331.4	83528.2	79566.9	87095.5	68837.4	44443.2	124097	47748.4	53919.8	62385.9	62332.6	39594.8	73923	76352.4	85184.1	98544	73373.1	51322.6	81449.7	106125	126351	140266	147049	164740	106541	190558	116113	96003	28796.6
A0A0D3BM82	124810	128405	237014	124937	224950	667010	185711	103109	241204	318875	88410.9	202901	181063	94375.1	204395	85239.3	146303	177125	245629	269280	279622	177655	134149	164505	78205.9	142123	Filtered	120493	22211	212495	241453	Filtered	80305.8	72368.1	74397.2	171311	68889.2	38885.2	74962.8	57642.8	143112	101995	68496	Filtered	81732.9	Filtered	Filtered	79428.9	234486
A0A0D3BM84	123250	196049	142812	93034.3	179929	Filtered	77285.4	72969.5	120941	91467.5	136993	119822	137624	52084.4	25322.3	62218.9	104349	130824	80066.6	128882	140509	53850.6	56184.2	142837	47292.6	77821.4	134770	62343.1	87335.9	141531	60221.4	139834	66747.4	58729.9	45480	66597.4	37080.8	49597.6	186555	86762.6	151803	101609	140222	171434	246238	156897	248253	393726	119268
A0A0D3BMC1	146210	187774	66685.3	194220	Filtered	Filtered	191291	100077	Filtered	43874.2	52529.7	27703.5	75058.4	Filtered	65538.3	Filtered	Filtered	62084.6	40943	40217.2	54061.9	24258.3	16030.6	46469	21732.6	47070.4	Filtered	71056.8	30671.4	Filtered	1468.86	63208.8	108402	89157.4	81381.6	108532	84980.7	106352	150328	Filtered	145859	142220	158722	255033	220124	155527	166020	218664	Filtered
A0A0D3BMD8	121706	95829.4	93129.7	6913.94	250045	Filtered	118076	201543	737309	75902.1	159106	115227	105837	217640	124621	109211	122300	121848	167645	190398	159011	161030	140875	75577	145496	94157	39434.6	84226	106963	119374	114355	75027.4	34714.5	89786	138626	149079	152685	118391	95743.4	151223	211665	70076.8	33446.3	40206.5	171889	63600.5	87673.3	232239	172134
A0A0D3BMD9;A0A0D3CPM5	108095	17892.8	30564.5	Filtered	Filtered	1.28881e+06	113814	4581.07	419785	316793	2530.05	34004.9	17667.7	Filtered	2909.87	20407.1	53484	18197	71711.8	39886.2	32788.6	35893.2	4354.54	5915.81	3287.96	96635.1	8231.52	59588	6542.41	37317.4	213160	5413.99	30631.3	22761.6	24735.3	52956.2	42868.5	918.242	13848.5	1	32052.9	45329.5	14605	54820	45661.2	Filtered	93485.1	57806.6	19409.7
A0A0D3BMM4	Filtered	Filtered	63174.9	Filtered	Filtered	740549	Filtered	Filtered	646960	305381	Filtered	Filtered	Filtered	Filtered	2880.45	Filtered	Filtered	Filtered	10126.6	Filtered	Filtered	1782.13	Filtered	4235.88	Filtered	Filtered	22250.8	Filtered	Filtered	57546.8	615983	Filtered	32643.1	65221.9	Filtered	8412.98	8835.57	Filtered	Filtered	Filtered	Filtered	Filtered	Filtered	Filtered	Filtered	Filtered	Filtered	Filtered	Filtered
A0A0D3BMR1	65642.3	68460.5	102692	85725.4	132115	150460	120056	100997	215691	122364	94357	137645	171271	56988.1	83484.4	90391.9	42840	113890	Filtered	42018.7	Filtered	Filtered	19594.5	51778.5	90809.3	176346	195252	241866	122471	155602	69387.8	63270.8	146594	89754	71676.8	56790.7	121390	63117.2	97475.3	114163	172504	154137	154021	184111	209244	231692	149094	354732	209377
A0A0D3BMU9;A0A0D3CQE1;A0A0D3CQN2	129213	116556	114755	60745.3	124810	466933	116626	40348.7	338788	216486	52427.8	91950.6	93777.8	839611	62629	88592.8	70546.5	53664.7	96298.3	108050	57276.7	132590	79834.5	9095.01	82736.1	74433.6	67502.4	160155	107455	128917	180447	98520.6	49266.1	30719.7	104979	27121.5	55388.8	7163.89	31335.4	41165.8	103409	207948	Filtered	84304.8	1.12262e+06	103782	127260	86768.8	274305
A0A0D3BN26	7017191	3.37188e+06	17059740	5534148	7.85765e+06	131219368	5887238	4848595	41878956	31469756	2.4929e+06	3.02815e+06	2.50072e+06	3.06937e+06	2570230	2.15759e+06	3004176	2.98631e+06	4.03662e+06	4.03595e+06	5767644	3813933	2.97032e+06	3.07407e+06	2554473	2.87705e+06	4.21489e+06	3.81663e+06	2.38144e+06	8803493	34914980	3494499	4.31057e+06	5035991	2.28699e+06	2765158	3342135	2.13736e+06	2.1962e+06	2.47124e+06	4.50104e+06	6.87533e+06	5172920	7910756	4680055	5.76988e+06	4.04567e+06	3563944	3.76529e+06
A0A0D3BN32	Filtered	Filtered	Filtered	Filtered	53765	Filtered	58441.7	1	26730.8	16980.5	124193	76806.8	4582.12	1	34588.2	54958.7	45760.1	20685.9	47684.8	4175.83	17255.4	59702.6	35141.7	57562.7	66440.5	45831.9	42740.8	51929.3	72180.6	1	81817.5	106644	49897.9	1	40299.6	29618.6	71107.7	84799.7	76615.9	3082.29	Filtered	59890.4	40957.4	104559	75945.7	53819.4	Filtered	Filtered	23377.9
A0A0D3BN55	1.59554e+06	1.1656e+06	845404	1.14201e+06	742692	1.20152e+06	689255	1.20662e+06	1.22411e+06	355523	702454	677424	529592	1.20309e+06	582266	759692	509740	525534	696733	462474	499351	952778	658271	588350	1.19482e+06	1.01384e+06	845516	1.02089e+06	1.18275e+06	744802	701064	737534	632141	312105	488394	452389	637861	709530	510796	528281	599482	570068	704353	1.0338e+06	929096	732783	794131	1.32289e+06	418952
A0A0D3BN92	6182234	4.23857e+06	3.88169e+06	5065632	4305740	5.90405e+06	4544009	4.26272e+06	8.25488e+06	2.50659e+06	3443589	2.29235e+06	2.29537e+06	3539916	2.31753e+06	2.612e+06	3.47169e+06	2.70152e+06	3551902	4.01724e+06	3.48316e+06	3.70784e+06	3.40269e+06	4021912	3.47827e+06	2.82568e+06	3.69181e+06	3.07777e+06	2.35024e+06	2.89632e+06	3.20365e+06	3066758	2.88471e+06	3.7982e+06	3976193	3.28052e+06	3.5854e+06	4.19212e+06	2.88255e+06	3.57434e+06	3.89574e+06	3.14222e+06	4.13974e+06	4646851	3.07601e+06	4.31161e+06	3.70481e+06	3.96838e+06	3.31443e+06
A0A0D3BNB0	34856.4	21631.5	95352.6	Filtered	Filtered	635256	Filtered	Filtered	574566	425385	11643.7	28015.4	9975.92	Filtered	20592.3	Filtered	Filtered	19977.6	21551.5	27294.9	38899.3	12928.8	Filtered	Filtered	Filtered	8784.95	Filtered	25233.1	19338	50819.3	188439	Filtered	13819.9	25482.8	Filtered	Filtered	Filtered	6828.45	Filtered	Filtered	16732.5	52034.2	21108.9	Filtered	Filtered	18784.3	Filtered	Filtered	15969.2
A0A0D3BNB1;A0A0D3CR32;A0A0D3CSF6	Filtered	1	115866	Filtered	Filtered	1.65223e+06	Filtered	Filtered	550575	434079	Filtered	Filtered	Filtered	Filtered	Filtered	Filtered	Filtered	Filtered	26830.4	Filtered	Filtered	7100.52	Filtered	Filtered	Filtered	Filtered	13103.4	Filtered	1305.22	67541.8	691812	Filtered	21331	57221.7	Filtered	Filtered	Filtered	Filtered	Filtered	Filtered	Filtered	Filtered	Filtered	59385.6	Filtered	Filtered	Filtered	Filtered	Filtered
A0A0D3BNC7	4501.8	29337	6925.04	26915.3	Filtered	Filtered	7290.33	43496.1	7399.53	1580.15	1787.28	1	1	1	11606.1	1	10233.5	3587.17	2633.42	1	2802.88	3916.66	26.4532	6299.63	2037.86	15753.9	10435.9	1.0077	11093	3112.53	3336.09	30458.9	3484.26	13736.2	6791.35	11360.8	28945	7302.92	11080.4	21919.5	8202.5	8847.75	19579.6	37452.8	9912.64	20987.5	Filtered	Filtered	20347.4
A0A0D3BND8	84097	1628.61	13094.8	Filtered	Filtered	24957.5	Filtered	Filtered	370342	38058	111981	90347.4	115012	154865	128649	132724	99779.6	78916.3	122184	137647	140465	113211	108134	52064.4	26173.3	47391.1	64294.8	84693.7	74246.4	37620.9	22205.5	93478.7	53667.1	75038.6	122575	87363.6	97580.2	145343	55935.1	88383.2	28466.2	36866.7	9140.9	Filtered	Filtered	Filtered	42866.4	Filtered	113808
A0A0D3BNE4	Filtered	30702	14659.5	50449.4	24497.7	55561.1	68454.8	63627.5	40550	56539.7	32383.7	54683.3	72738.5	44922	56178.1	36264.3	21247.1	35426.3	58363.7	79323.2	48516.3	20341	25131.6	21593.6	10116.7	15074.2	12701.4	18059.6	27816	18633	9181.35	5036.72	57559.1	39564.4	49525	82406	31074.4	65798.6	60696.4	58318	65137	52593.1	32388.6	19216.4	46981.6	60292.4	51670.7	64788.2	72818.7
A0A0D3BNG7;A0A0D3C6Q7	Filtered	Filtered	Filtered	Filtered	Filtered	Filtered	Filtered	Filtered	18131	14290.2	Filtered	57075.5	25274.3	27901.5	15251.2	Filtered	Filtered	42733.8	18317.4	40765	44835.4	14460.5	11207.4	4493.12	9697.38	27746.2	Filtered	5024.25	Filtered	31826.4	4582.67	Filtered	55814.1	Filtered	15612.6	33135.1	18256.2	14153.9	4878.25	3143.78	Filtered	25350.4	15105.3	5536.26	10696.3	Filtered	3537.01	Filtered	52916.9
A0A0D3BNH3;A0A0D3D214	120287	214937	123340	95937.8	208201	Filtered	203829	124556	59426.8	232176	108306	103349	315435	Filtered	238344	163393	88594.6	131287	299000	180952	164936	76451.6	170567	156761	147373	171495	99408.1	198460	54574	125545	111736	15991.4	202418	228039	214167	192623	243259	240554	202459	202744	207426	171238	118233	85750.3	86150.9	104562	145473	Filtered	135380
A0A0D3BNJ7;A0A0D3BW71;A0A0D3CVE9	836570	475169	649773	573335	1.16483e+06	1.04982e+06	943866	482182	665262	1.06972e+06	769390	1.14943e+06	1.36236e+06	514376	1.13426e+06	827945	777551	1.13961e+06	1.02131e+06	1.30296e+06	1.0919e+06	449755	673599	543481	393231	735330	380165	825300	398328	1.05038e+06	451863	393703	725024	509516	612378	1.09337e+06	603705	796051	560372	742903	1.07576e+06	972096	297460	344772	402557	365911	459261	419179	866371
A0A0D3BNK6	266399	275810	318286	217969	235620	316469	317625	188592	148088	134152	237105	185796	196704	223195	166496	159027	287545	195563	225864	219197	177400	271226	252115	268446	278240	220512	265474	268184	226483	188158	256065	204283	208319	268017	186964	191689	241106	259721	234968	282512	425051	381011	457030	515209	576528	508795	407526	593261	214395
A0A0D3BNL1	2993911	1.42027e+06	3.43927e+06	2612480	3454900	3.04819e+06	3.15614e+06	1.04001e+06	5332553	450963	2173446	2.30365e+06	2354618	2659961	1.91583e+06	1860073	522831	2474700	591281	152367	1.06369e+06	1.56557e+06	854517	934848	5.52833e+06	3.84972e+06	4422943	2435361	4374288	4384872	3.76252e+06	4718756	1.38921e+06	1.17886e+06	3.21374e+06	1.40632e+06	1.87702e+06	350686	1.44251e+06	3.99737e+06	1.34584e+06	1.91059e+06	973572	1.80708e+06	1.97637e+06	646223	1.83485e+06	3727072	1
A0A0D3BNL2;A0A0D3C6P9	44476.2	Filtered	128139	Filtered	200649	Filtered	112919	Filtered	96501.1	75233.9	Filtered	84717.3	107739	172689	64360.9	140603	116786	116552	91557.3	92026.5	95346.9	118562	116438	Filtered	Filtered	52901.9	115858	Filtered	141836	152961	42642.6	71613.4	10037.3	41647.4	Filtered	22394.8	64694.7	Filtered	51902.1	Filtered	125614	1629.3	Filtered	29495.5	Filtered	28972.4	Filtered	Filtered	5741.72
A0A0D3BNM3	Filtered	Filtered	Filtered	Filtered	Filtered	Filtered	Filtered	Filtered	14256.1	2733.41	Filtered	Filtered	Filtered	Filtered	Filtered	Filtered	Filtered	Filtered	Filtered	Filtered	Filtered	Filtered	Filtered	4778.52	Filtered	Filtered	Filtered	Filtered	Filtered	Filtered	7080.63	7466.21	Filtered	13094.5	8505.81	Filtered	10203.3	13015	10179	10489.8	Filtered	Filtered	Filtered	Filtered	Filtered	Filtered	Filtered	Filtered	6787.5
A0A0D3BP63	354608	264668	214431	427256	410625	435156	286143	496381	68523.5	169366	170222	145486	174878	173369	130233	183307	199215	104818	111493	116476	149078	162656	145025	142657	160371	140627	178495	188094	139191	156393	136220	222089	99371.9	168020	176122	127908	123730	187448	191814	165797	309855	251621	378215	365282	436241	303111	478420	560649	165230
A0A0D3BP95	Filtered	Filtered	Filtered	Filtered	Filtered	Filtered	3486.52	Filtered	Filtered	1472.29	17.6148	Filtered	1	Filtered	Filtered	Filtered	Filtered	Filtered	Filtered	1	Filtered	Filtered	1	Filtered	Filtered	1	364.941	Filtered	Filtered	Filtered	Filtered	Filtered	2140.76	1084.93	Filtered	3063.05	875.065	Filtered	Filtered	171.252	Filtered	Filtered	2629.67	Filtered	Filtered	Filtered	Filtered	Filtered	1477.79
A0A0D3BPA6	5486.07	12070.6	1.08555	Filtered	Filtered	Filtered	Filtered	3211.07	Filtered	Filtered	Filtered	Filtered	Filtered	Filtered	1	1	Filtered	Filtered	Filtered	Filtered	Filtered	1	Filtered	Filtered	Filtered	Filtered	Filtered	Filtered	1	1	Filtered	1	Filtered	Filtered	1	Filtered	Filtered	Filtered	Filtered	1	1	Filtered	1	1	Filtered	1	Filtered	Filtered	Filtered
A0A0D3BPE1	100224	45247.2	42260.1	63796.7	Filtered	Filtered	505141	93877.5	Filtered	32396.4	51989.9	45172	40406.4	Filtered	Filtered	5055.05	8272.62	34965.7	46790.2	27545.9	38298.6	40344.8	27419.4	54637.5	30322.9	29219.7	41956.2	14226.6	44430	Filtered	Filtered	34608.9	50419.9	43308.5	405320	58133.5	65011.4	45004.2	46796.3	77682.4	145989	100395	135275	115787	133686	126009	74655.8	Filtered	65748.4
A0A0D3BPF2	Filtered	68607.2	8963.1	84165.7	77228.3	5070.3	23610.3	47098.6	89.0325	64848.8	132218	178753	124334	185174	115409	144861	132316	91067.7	98235.4	106217	53897.8	124164	108958	29447	106558	53232.4	94059.8	74577.9	98342.2	85671.7	50889.5	87945.1	15728.8	39760	141701	8517.4	13491.5	35004.6	58779.6	147399	Filtered	57080.8	33051.1	71025	Filtered	22319.4	67330.7	124621	7491.94
A0A0D3BPF5	882276	1.07317e+06	420483	935927	563342	670362	471066	1.181e+06	1.06017e+06	580675	1263567	681672	708629	1.04998e+06	456548	934438	716861	427641	415795	508161	462929	856343	804074	849841	1.07338e+06	436848	848103	603555	930699	478350	897474	1023107	392907	1.17947e+06	811538	523553	1.07379e+06	1.14066e+06	1.14908e+06	976676	846638	616573	945534	1.02867e+06	1.31066e+06	1.1737e+06	1.21502e+06	1.60962e+06	997993
A0A0D3BPJ8;A0A0D3BWW8;A0A0D3C622;A0A0D3CUT8;A0A0D3DUC9	578659	239160	284500	271223	378130	492548	161113	280241	438518	161244	441246	204821	164928	559428	104910	610777	160746	175897	152668	154857	166997	239188	243715	186139	306822	175965	390161	108082	406341	228850	337837	611966	64003	311958	399537	95869.5	201238	455926	441431	628035	349456	133108	116178	254340	360281	210048	293028	320568	218100
A0A0D3BPK4;A0A0D3C627	Filtered	Filtered	Filtered	Filtered	Filtered	Filtered	Filtered	Filtered	Filtered	Filtered	Filtered	Filtered	Filtered	Filtered	Filtered	Filtered	Filtered	Filtered	Filtered	Filtered	Filtered	Filtered	Filtered	Filtered	Filtered	Filtered	Filtered	Filtered	Filtered	Filtered	Filtered	Filtered	Filtered	Filtered	Filtered	Filtered	Filtered	Filtered	Filtered	Filtered	Filtered	Filtered	Filtered	Filtered	416437	226846	Filtered	Filtered	Filtered
A0A0D3BPK9	Filtered	Filtered	Filtered	Filtered	Filtered	Filtered	Filtered	Filtered	222148	6137.43	Filtered	10881.4	12471.2	22546.7	Filtered	Filtered	Filtered	Filtered	Filtered	Filtered	Filtered	Filtered	Filtered	Filtered	Filtered	Filtered	Filtered	Filtered	Filtered	Filtered	Filtered	Filtered	Filtered	Filtered	Filtered	Filtered	Filtered	Filtered	Filtered	Filtered	Filtered	Filtered	Filtered	Filtered	Filtered	Filtered	Filtered	Filtered	Filtered
A0A0D3BPL1	Filtered	Filtered	Filtered	Filtered	Filtered	Filtered	Filtered	Filtered	3.15034e+06	391004	589868	992742	927561	1.45234e+06	556122	365197	33837.4	297056	108669	132807	110287	72445.9	77896.2	25169.5	234763	354206	119229	385845	550317	311924	145281	289902	182806	69612.3	187006	419972	159772	279359	128298	241428	Filtered	Filtered	Filtered	Filtered	Filtered	Filtered	Filtered	Filtered	202928
A0A0D3BPL2	Filtered	Filtered	Filtered	Filtered	Filtered	Filtered	Filtered	Filtered	Filtered	Filtered	Filtered	Filtered	Filtered	Filtered	Filtered	Filtered	Filtered	Filtered	Filtered	Filtered	Filtered	Filtered	Filtered	Filtered	Filtered	Filtered	Filtered	Filtered	Filtered	Filtered	Filtered	Filtered	Filtered	Filtered	Filtered	Filtered	Filtered	Filtered	Filtered	Filtered	Filtered	Filtered	Filtered	25045	109630	50801.4	23690.7	Filtered	Filtered
A0A0D3BPL9	19887.8	17051.4	32574.7	8532.64	Filtered	Filtered	32536.9	7536.21	Filtered	12012	Filtered	18314.2	18308.7	Filtered	38267.7	15588.6	Filtered	26562.1	28754.8	45389.8	54476.2	8506.36	22733.8	Filtered	Filtered	16718.2	Filtered	20226	8289.09	Filtered	4767.21	18251.6	19454.8	Filtered	4228.67	31393.5	1767.32	1696.78	7987.59	Filtered	32220.5	50323	16481.5	3044.67	2687.51	33353.5	12954.8	Filtered	26163.7
A0A0D3BPM1	4.49725	17731.7	130090	1.3699	Filtered	1.33791e+06	56848.4	1	219265	157784	1	1	11190	Filtered	2257.1	13457.6	6462.54	7056.9	1	4263.54	8455.32	1	1	1	Filtered	1	Filtered	Filtered	Filtered	23254.6	191410	5301.19	13889.8	14577.8	Filtered	1	4774.45	Filtered	1	Filtered	69151.8	120961	52803.5	45827.1	1	85336.2	27728.6	Filtered	Filtered
A0A0D3BPN3;A0A0D3C660	Filtered	25540	Filtered	Filtered	Filtered	Filtered	Filtered	81015.7	107371	208412	115098	Filtered	149853	167029	Filtered	177790	155632	112819	140916	183073	176212	171806	177612	161207	64826.6	61716.7	94681.2	51246.3	100816	Filtered	138741	Filtered	39969	71157.9	90617.1	105681	120467	123811	92730.5	88412.1	98575.6	Filtered	Filtered	Filtered	Filtered	134537	Filtered	798.67	143492
A0A0D3BPP8	2.61314e+06	1.4711e+06	2.21531e+06	1.83802e+06	2.97034e+06	2.77836e+06	2.59054e+06	1.9412e+06	1.68206e+06	2.53527e+06	2.01629e+06	2.76385e+06	3.08677e+06	2.08987e+06	2.64713e+06	1.53085e+06	1825411	2785926	2922455	3.55469e+06	2.89169e+06	2039324	2.35172e+06	2011520	1.43738e+06	1.82456e+06	1.64943e+06	2352400	1.78804e+06	2572469	1373361	1.74289e+06	1.58201e+06	1.45773e+06	1.61807e+06	2.79524e+06	1.69751e+06	1.84764e+06	1.58281e+06	1.93391e+06	2.55666e+06	2136668	1.00549e+06	1.10246e+06	1333765	1.24783e+06	1.47769e+06	1.53728e+06	2.32553e+06
A0A0D3BPQ4	41408.1	51973.1	Filtered	Filtered	Filtered	Filtered	Filtered	Filtered	Filtered	Filtered	34436	Filtered	Filtered	12697.4	2618.22	Filtered	Filtered	Filtered	Filtered	1	Filtered	5466.6	1	12015.4	Filtered	Filtered	Filtered	Filtered	11868.1	Filtered	4462.85	Filtered	9602.43	11796.7	Filtered	7988.7	6415.62	Filtered	9278.22	14224.3	1.07618	68404.6	Filtered	Filtered	Filtered	Filtered	1	24039.1	1
A0A0D3BPS3	68685.3	77945.5	Filtered	Filtered	Filtered	Filtered	62741.5	82004	338058	91613.5	162138	112510	99070.7	195830	82401.1	84806.5	37240.4	23343.3	67075.1	52788.1	26253.9	45271.4	34980.1	51132.1	65473	58958.9	28856.3	47160.3	41213.9	Filtered	19437	24302.8	111658	20261.9	31766.3	26381	44543	57351.6	22822.7	Filtered	94763	49506	128300	145019	165778	215472	94698.3	152322	30998.3
A0A0D3BPW9	146446	154621	93098.3	234432	152988	152280	106939	363440	28937.7	52155.5	32081	38591.6	48002.9	87735.5	42887.3	1750.39	26056.2	40183.8	29235.5	67921.3	35639.9	55348	18159.2	65777.5	21160.9	33237.4	79356.2	81159	45560.6	62769.1	730.917	51265.9	43520.6	37017.1	63867.3	41976	111226	46172.1	8811.94	74859.2	47431.6	95450.6	134307	162980	17782	131256	164817	342806	31106.4
A0A0D3BPY9	3.78699e+06	2.03889e+06	1.11801e+06	2.99944e+06	1.58078e+06	2.91425e+06	996064	3.01801e+06	2840244	430560	2.25517e+06	598187	601667	2.07414e+06	609558	1661287	1634238	601560	673757	732195	745152	2.36416e+06	1.99811e+06	1839021	2.11399e+06	636506	1.7146e+06	708382	1.63523e+06	568207	1.28038e+06	1.91195e+06	425569	1.42812e+06	1.22658e+06	344590	1.68487e+06	1594065	1.06578e+06	1.29172e+06	1.15958e+06	990526	2.23374e+06	2.78033e+06	2.31189e+06	2.52566e+06	2.42313e+06	2.82534e+06	686748
A0A0D3BQ24	660124	364536	462537	693348	683796	581639	735011	743379	323454	431497	398303	488468	505276	626113	486871	491147	420758	501797	495875	558425	552851	387815	591872	385332	351551	355320	431155	453461	288698	539463	302400	363265	354744	344684	562564	374526	378410	406838	531140	677456	677186	452249	258859	307790	424105	435571	793768	1.0302e+06	412142
A0A0D3BQ40	1537379	1755781	2568027	1426771	3609609	2.26243e+06	2.38323e+06	2.00153e+06	685512	1.36616e+06	1.62197e+06	1.48715e+06	1.36004e+06	1.86549e+06	1.20602e+06	1.53819e+06	1.25491e+06	1115905	1.36804e+06	1.27675e+06	1.19329e+06	1.24778e+06	1.21295e+06	1.21398e+06	1.23084e+06	1.36995e+06	1.58953e+06	1.18224e+06	1.30393e+06	918522	1.01731e+06	1.38834e+06	1620926	1.06082e+06	1543814	1.2194e+06	1.27112e+06	1.42269e+06	1.53601e+06	1.61962e+06	1519273	1.25879e+06	1.28585e+06	1.87621e+06	984969	1.4669e+06	1.50948e+06	2159548	1889001
A0A0D3BQ71	2.45399e+06	934453	1.08569e+06	1.73387e+06	1527171	2.64012e+06	1.06284e+06	1.19605e+06	778492	277216	669093	428182	525328	752588	574837	847738	692792	514846	555154	669168	608851	749852	908970	713167	606668	584164	610704	300279	544781	760549	622115	867041	679750	771707	847465	486360	946423	847098	957172	1.24226e+06	811071	645552	504567	560217	890127	602181	939261	597174	843822
A0A0D3BQC7	488474	240167	223485	347650	255585	1.4018e+06	238291	387817	192491	150730	103860	113836	91126.3	129253	99885.4	168028	115835	130635	115537	128611	111129	119546	139563	113848	125153	131865	152071	163170	105476	164650	240054	282959	78663.9	137405	115905	147553	213823	116128	180256	195623	374885	344290	324349	387867	363627	345129	320191	489139	196885
A0A0D3BQG5	52531	93266.6	154215	71848.5	98001.7	Filtered	99049.2	25387.8	277529	16578.9	Filtered	47954.8	53628.1	16748.9	76644	27174	97250	101468	69434.9	109264	164028	100851	98662	105723	55378.2	71625.9	62035.2	Filtered	106433	122195	84357.2	166011	60599.8	67118.4	50757.6	77242.2	88716.7	3171.48	32849.9	109231	43104.4	116549	86687.9	157273	60032.3	103897	28763.3	21686.8	59090.2
A0A0D3BQK7;A0A0D3BXS9;A0A0D3DTA6	1.5182e+06	449980	782471	626328	1.18614e+06	1.83821e+06	874331	451989	1.30419e+06	1.19852e+06	624933	1.19166e+06	1.04241e+06	695674	849907	458719	371036	691679	887006	989938	804858	392938	434854	443092	394302	542295	405537	622046	277558	561336	395736	322493	709716	312436	329695	949011	356719	443565	322147	432049	892116	732769	379760	472011	520239	555298	414376	584331	746839
A0A0D3BQN9	1.33028e+06	Filtered	606025	835392	897324	873846	Filtered	1.17848e+06	Filtered	321549	559990	383894	394076	Filtered	390237	639328	349862	353689	347178	336481	336807	568204	356422	455019	564068	402416	602375	Filtered	555834	483173	Filtered	447340	Filtered	391313	Filtered	374138	475012	475972	145477	208143	744634	750862	825461	899701	1.04586e+06	795884	938799	1.34141e+06	456792
A0A0D3BQP0	175.791	2522.43	Filtered	Filtered	Filtered	Filtered	Filtered	8931.81	Filtered	Filtered	Filtered	Filtered	Filtered	Filtered	Filtered	Filtered	Filtered	Filtered	Filtered	Filtered	Filtered	Filtered	Filtered	Filtered	Filtered	Filtered	Filtered	Filtered	Filtered	Filtered	Filtered	Filtered	1442.94	4912.18	Filtered	11415.9	Filtered	9709.22	Filtered	Filtered	6135.81	1	1536.91	4967.02	7521.48	Filtered	Filtered	Filtered	16465
A0A0D3BQU0	184840	159069	108128	88940.9	155246	204908	101455	117711	436128	70898.6	105851	91177.9	77381.5	162965	58319.6	105848	74110	70642.2	105272	100098	99905.4	112062	95229.7	93919.8	70099.2	66891.7	66539.3	96550	82442.4	83892.6	87981.4	83032.7	150346	65971.5	117782	80783.4	130735	79428	51283.8	122842	72658.9	70947.3	Filtered	69601.5	108070	Filtered	77036.6	Filtered	101347
A0A0D3BQU6	4531342	1.01131e+06	2.37334e+06	3.41544e+06	3.69041e+06	5.34337e+06	2.03585e+06	Filtered	10536158	1.11331e+06	98706.7	856115	162526	1.82832e+06	399207	Filtered	3517869	798450	3.57468e+06	603831	3.55484e+06	3.40067e+06	3.76681e+06	Filtered	Filtered	2.57542e+06	2.69978e+06	3034296	3.97698e+06	61197.8	3061564	4.08524e+06	2.05017e+06	382704	3.18793e+06	2.71405e+06	5877426	5417887	7.22709e+06	4618467	2848051	2.85138e+06	4.10378e+06	7043288	2.77027e+06	1.32331e+06	3.65031e+06	3112451	5980655
A0A0D3BQW3	22259.1	19832.3	25207.5	16959.9	52386.9	17405.5	37959.9	29045.8	Filtered	Filtered	Filtered	Filtered	Filtered	Filtered	Filtered	Filtered	7918.54	9233.33	7657.62	12007.2	8915.9	9732.84	12740.5	13224.3	10421.8	9792.15	8453.74	14982	9380.72	8870.99	9679.25	7949.31	28142.1	13538.2	18452.3	14869	22550.1	23351.4	19257	17672.9	Filtered	7121.69	4168.62	6638.37	8000.66	Filtered	4861.72	18076.5	9303.13
A0A0D3BQW6	3495.15	13454.9	813.112	4572.73	21590.8	2878.76	Filtered	27654.2	81093.9	1787.85	64889.4	32555.5	3585.5	76888.1	30454.8	63664.1	8075.68	18306.8	23579.9	28510.8	18683.3	9189.89	8913.62	12332.8	5919.32	17108.6	3352.87	1001.59	28115.6	1859.26	11599.2	3443.77	3308.62	1715.64	2396.64	5680.95	13999.3	8557.71	2491.88	4003.84	247.001	434.545	15860.7	1475.83	19912.5	10903	498.64	Filtered	3543.38
A0A0D3BQY2	1.49283e+06	918729	1657574	1.07758e+06	704952	8196747	357136	1.35446e+06	2.1971e+06	1.80975e+06	729209	434186	531202	272255	384361	401437	533901	688690	638495	877150	673164	350649	719348	594030	1.54668e+06	877608	678093	1.77239e+06	821824	1156395	2.76591e+06	217697	849637	621643	1.08711e+06	694930	633598	206992	981919	1.3462e+06	206689	1.40958e+06	1221822	421470	552854	838003	610430	667400	834309
A0A0D3BQZ8	162179	205802	256762	440172	758697	300570	248546	518133	96896.2	222761	169515	170830	190997	118937	98674.3	254457	186946	118088	142431	147217	177790	146807	126779	257797	215163	101510	208730	589446	244271	127937	152407	411192	106481	298659	172849	146753	408988	293237	256784	309006	269642	227379	346322	185508	133371	404699	336579	217283	130847
A0A0D3BR07	1.76161e+06	1.6331e+06	971786	1.09209e+06	1.10011e+06	1.47014e+06	1.21915e+06	1.07967e+06	614753	588297	690622	548839	759293	851362	541792	596771	897763	808133	1.05164e+06	1.18929e+06	876082	836968	733077	1.04045e+06	899755	921678	945046	877688	698765	1.01559e+06	740013	715229	1.27942e+06	1.02878e+06	900764	1.24361e+06	974164	974932	1.00589e+06	1.05832e+06	1.53775e+06	1134748	1.05269e+06	1.07848e+06	1.19806e+06	1.0419e+06	1.30224e+06	1.87259e+06	1.46294e+06
A0A0D3BR11;A0A0D3C4W7	134191	171142	61803.7	135444	213576	35720.6	144178	Filtered	74584	145902	164486	163750	167328	121886	80877.1	107122	93229.6	115629	62595.9	88782.9	58166.3	67016	55481.5	99740.8	62400.6	69208.4	96567.1	88149.8	65251.1	36534.8	69316	9318.19	118154	117814	131583	166118	75940.8	105697	108964	101024	143755	30253.7	47501.2	63994.7	32745.3	39976.2	62734.9	89513.5	88030.8
A0A0D3BR54	90709.6	Filtered	Filtered	197204	169072	202406	150114	81056.8	Filtered	3296.33	Filtered	Filtered	Filtered	Filtered	Filtered	Filtered	Filtered	Filtered	Filtered	Filtered	Filtered	Filtered	Filtered	Filtered	Filtered	Filtered	Filtered	Filtered	Filtered	Filtered	Filtered	Filtered	Filtered	Filtered	Filtered	Filtered	Filtered	Filtered	Filtered	Filtered	67822	97387	95965.3	87320	7562.39	47300.1	65361.8	Filtered	Filtered
A0A0D3BR77	Filtered	26344.3	Filtered	Filtered	Filtered	Filtered	Filtered	Filtered	Filtered	Filtered	Filtered	Filtered	Filtered	Filtered	Filtered	23044.1	Filtered	Filtered	Filtered	7988.82	Filtered	28121.6	Filtered	Filtered	41601	Filtered	Filtered	Filtered	Filtered	Filtered	Filtered	Filtered	Filtered	41572.3	27961.7	19374.9	37337.7	51370.6	43722.7	Filtered	Filtered	Filtered	Filtered	26133.6	Filtered	Filtered	23648.9	14691	15635.2
A0A0D3BRA0	686107	317107	418293	663093	496521	598911	313869	477545	412608	106014	295069	262560	343481	546351	147927	517701	234768	180694	256428	319574	145150	277110	150956	396689	440136	468812	536602	288058	352484	333484	352994	231593	492897	334818	607474	171822	302809	355502	412987	469941	667797	369929	335141	808101	598098	624091	544435	844100	350847
A0A0D3BRB2	264974	68370.3	237572	367294	352060	879280	200940	210367	64648.4	60655.7	133499	65235.5	78593.8	59047.4	105148	185455	120655	76314.6	110433	129744	117876	141544	130566	154227	185078	155881	188834	175190	195638	85449.3	150264	199673	24328.5	73217.8	78975.8	54750.5	156654	91133.2	83450	178365	197561	125709	195827	186809	330955	196527	255529	231278	69303.7
A0A0D3BRD3	Filtered	Filtered	89912.2	Filtered	Filtered	Filtered	54631.1	Filtered	Filtered	64442.8	Filtered	22717.9	Filtered	Filtered	Filtered	Filtered	7792.02	33586.3	27001	17336.6	66826.5	Filtered	16351	35820.7	Filtered	33986.1	39655	43305.2	Filtered	76307.7	55763.4	Filtered	68079.5	Filtered	44189	18389.7	30932.5	32826.1	6588.4	Filtered	164658	130303	163004	140010	Filtered	84013.9	242398	117332	31319.5
A0A0D3BRG9	556923	216591	385992	601936	337837	617692	827502	589824	564127	176925	331995	186832	114284	353064	187220	255165	241320	155500	438514	282743	187036	458580	250322	223500	145575	288740	331343	290204	239324	330996	335161	163978	264483	294288	193424	342175	254901	294280	256286	436548	184277	394919	467894	461666	275546	206750	439231	758322	181663
A0A0D3BRJ1	Filtered	Filtered	Filtered	Filtered	Filtered	Filtered	Filtered	Filtered	Filtered	Filtered	Filtered	Filtered	Filtered	Filtered	Filtered	Filtered	Filtered	Filtered	4538.45	24367.5	973.718	Filtered	Filtered	1	Filtered	Filtered	Filtered	Filtered	1	Filtered	Filtered	Filtered	22086.7	Filtered	Filtered	3578.71	Filtered	Filtered	Filtered	Filtered	Filtered	Filtered	Filtered	Filtered	Filtered	Filtered	Filtered	Filtered	Filtered
A0A0D3BRP3	1.12406e+06	193496	33558.7	8968.34	188286	201360	298538	193611	136405	121018	156558	111776	170591	162309	190852	151384	102585	143133	90805.7	99548.7	88486.8	131496	99051.3	128577	172560	141252	199813	201468	149893	141596	183525	237818	122188	308954	204159	152247	217217	310897	270205	268903	631.362	19.7053	1	4873.67	140309	101242	76421.9	179225	356291
A0A0D3BRQ7	344115	Filtered	467369	496596	509307	500097	488334	1	3.23448e+06	224204	9736.81	434781	10796	367874	165046	279738	275539	14494.9	248784	218953	230830	202081	206692	179742	1	430401	202785	166795	388897	Filtered	192744	340966	217861	137085	251107	231375	312395	471841	385807	263420	219276	380397	453338	774777	372465	13658.2	188411	174470	123051
A0A0D3BRT9	438486	129325	352757	231484	619196	669826	451913	181879	376579	277475	344734	323600	452042	425006	531100	317242	327609	322631	401636	615225	440882	316388	350868	390224	324763	370260	397911	245667	278227	626816	378446	545371	565918	339267	567755	577979	517598	316297	500487	654064	119902	203339	148675	96052.9	Filtered	Filtered	21288.2	83720.6	492797
A0A0D3BRU9	4317289	3.03862e+06	3413058	4.35677e+06	5617847	5093484	4243797	3.68531e+06	5021699	720142	2.65555e+06	1.36577e+06	806274	4.33003e+06	2078830	3.34715e+06	1.96398e+06	1477955	1.77234e+06	960552	1.17774e+06	2.59366e+06	2.43806e+06	2.07913e+06	1.70676e+06	1.51906e+06	2.30032e+06	1.12451e+06	2.26376e+06	1.15602e+06	1.40514e+06	1.44218e+06	2.30711e+06	1.93802e+06	2.6918e+06	808367	2.36427e+06	3202916	2.12204e+06	2911918	737331	954585	999547	1.47371e+06	1.18108e+06	838937	1.42882e+06	784745	585284
A0A0D3BRY1	323885	294599	392202	245132	455947	722118	455595	358466	210253	130643	180979	182144	158217	220723	209764	310476	203272	145617	158665	135841	179485	255824	169486	163901	346960	275597	211714	231080	314418	190130	215061	786506	341707	32193.5	259253	190235	310610	211139	261039	204722	97461.1	126886	217266	168745	99527.4	224549	181064	161279	85243.5
A0A0D3BRY2	28473.9	73245.7	14176	25936.4	1	Filtered	Filtered	33943.5	66005.4	29799.8	33481	25679.9	38200.2	35239	27804.6	27607.8	36130.6	32970.7	37592.9	31923.3	27156.3	34726.2	40224.9	57144.5	40352.6	33587	32349.6	34341.3	31051.7	36431.7	33377.3	30373	12253	39423	25906.9	34492.6	44308.1	45728.1	31898.1	27637	40183.8	18488.5	29664.6	55404.8	36229.6	40002.6	55561.4	82165.1	53484.3
A0A0D3BS02;A0A0D3C479	1756307	611722	513162	545418	940910	726172	538153	754292	226195	334829	456167	337646	679030	527813	656094	507209	366978	479603	319236	412186	404629	368880	734964	415171	745877	385744	969705	451292	270592	516907	252937	524655	292312	486809	491867	509423	397647	518554	530149	660457	523123	829949	555830	459471	581902	433126	690680	467907	413127
A0A0D3BS25	537064	318848	489588	386285	571650	759101	665014	547738	338637	182056	231550	233763	268607	161602	218937	249250	165726	206223	200867	227483	234564	209071	216227	207753	221124	191576	262776	283219	210554	218208	213101	232022	188638	262005	236320	326289	328062	312119	279765	324434	535510	398035	332611	513345	424492	540416	467149	559931	278173
A0A0D3BS56;A0A0D3CEM6	Filtered	Filtered	Filtered	Filtered	Filtered	Filtered	Filtered	41926.1	Filtered	Filtered	Filtered	59308.7	Filtered	Filtered	Filtered	Filtered	54759.4	30581.3	45518.2	53509.5	Filtered	89735.5	45869	59524.4	39822.1	39542.1	59294.5	6017.89	31525.9	15983.3	32995.9	Filtered	96692	88416.1	78969.8	98418.9	132708	61919.1	82514.4	57236.1	Filtered	Filtered	Filtered	Filtered	Filtered	Filtered	Filtered	Filtered	58401.7
A0A0D3BS61	175941	1	682725	Filtered	Filtered	3.51127e+06	54059.4	Filtered	2322520	1.34279e+06	Filtered	Filtered	Filtered	Filtered	1	Filtered	Filtered	Filtered	15437.9	4714.36	2381.13	Filtered	1	1	24032.1	12164.1	172912	4825.56	15913	288032	1588946	Filtered	152409	84580.7	Filtered	Filtered	1	Filtered	Filtered	Filtered	Filtered	14477.2	9422.9	78500.7	27070	47802.4	22299.2	Filtered	Filtered
A0A0D3BSB8	Filtered	82510.7	8421.48	92495.3	Filtered	Filtered	Filtered	75083.4	11646.7	97243.8	201965	83704	102218	157438	70107	160242	68304.5	47142.5	15659.9	24434.9	35111.8	82186.1	83369.9	97317.3	146036	59605.9	104323	107923	97883.1	68331.2	92017.7	128200	51584	145109	97401	49861	102252	142854	147413	163693	75928.1	51523.9	76491.1	108589	91022.8	79809.5	56922.7	58721.3	99056.5
A0A0D3BSC0	2.18692e+06	835605	387957	1.07737e+06	1.05687e+06	2.10622e+06	243139	2.37923e+06	1.65751e+06	248056	760725	661176	561312	1.56769e+06	278786	971512	825356	650515	517487	398885	617255	1230854	1.15104e+06	1.0268e+06	1.89061e+06	776678	1.10184e+06	983590	1.83029e+06	855201	1.57046e+06	2.31286e+06	222920	511422	603689	347167	1.05681e+06	1.2472e+06	666589	1.28413e+06	721257	602326	860594	808460	2.19665e+06	1.63953e+06	1.50514e+06	1.97478e+06	340103
A0A0D3BSC1	8244.9	Filtered	Filtered	12944	Filtered	Filtered	14172.9	3917.83	Filtered	Filtered	Filtered	Filtered	Filtered	7885.39	2770.81	Filtered	Filtered	1615.06	Filtered	Filtered	Filtered	Filtered	Filtered	Filtered	Filtered	Filtered	Filtered	Filtered	Filtered	Filtered	Filtered	Filtered	Filtered	Filtered	4893.28	Filtered	Filtered	Filtered	Filtered	Filtered	14909.1	Filtered	Filtered	4118.4	5802.71	Filtered	Filtered	Filtered	1
A0A0D3BSH8	10601.1	61739.9	66757.9	75923.4	61597.2	124248	159033	54597.3	150684	96911.4	95736	113699	61890.8	120666	89255.5	83721.3	87614.4	57451.4	135035	124826	70504.4	85411.9	85732.7	86707.7	65202.7	47715.6	80928.7	80568.5	32175.6	32838.3	53531.6	32646.1	70786.7	68500	78377	120458	90880	100163	46215.2	44596.9	96974.6	157004	59137.4	74413.6	56600.9	73982.7	97525.9	34600	71455.4
A0A0D3BSM6	Filtered	Filtered	1722.29	3877.01	999.982	Filtered	Filtered	Filtered	Filtered	3998.16	Filtered	Filtered	Filtered	Filtered	942.205	Filtered	Filtered	353.498	2165.13	3009.04	2703.07	2595.39	1893.73	3916.29	777.514	1	2668.12	Filtered	1	579.695	Filtered	Filtered	352.363	1449.24	1165.23	5030.58	1791.28	794.49	1957.23	1331.47	Filtered	Filtered	Filtered	Filtered	Filtered	Filtered	Filtered	Filtered	3836.92
A0A0D3BSQ5;A0A0D3C3R9	Filtered	Filtered	Filtered	Filtered	Filtered	Filtered	Filtered	Filtered	6776.2	Filtered	535.319	1074.9	Filtered	Filtered	496.937	1887.75	2308.47	994.36	1359.5	2463.51	1440.25	Filtered	1769.26	619.75	2170.16	Filtered	Filtered	1203.38	Filtered	Filtered	Filtered	Filtered	Filtered	2268.47	Filtered	2513.22	Filtered	1933	1031.36	Filtered	Filtered	Filtered	Filtered	Filtered	Filtered	915.991	Filtered	Filtered	3187.91
A0A0D3BSR4	1.03603e+06	754159	663374	1012082	869862	992084	746268	930230	218651	264483	469180	343539	367688	443700	281133	306344	354675	281968	305287	368970	252584	322070	338723	362130	403106	283102	365179	406400	284964	303846	300293	338569	266728	403690	442877	270903	362008	429046	358150	402966	683868	517816	847879	770659	999716	550311	720242	815721	378514
A0A0D3BSU4	71234.3	33823.3	56836.2	51877.4	38415.7	Filtered	41550.9	44646.8	1439.19	1148.09	Filtered	4700	Filtered	24102.9	4043.62	4741.43	Filtered	Filtered	Filtered	Filtered	Filtered	Filtered	Filtered	611.902	Filtered	Filtered	Filtered	6029.05	Filtered	2127.95	Filtered	Filtered	829.145	586.953	Filtered	310.512	626.747	603.266	Filtered	Filtered	35013.7	Filtered	Filtered	Filtered	22750.9	16400.5	Filtered	Filtered	855.975
A0A0D3BSV5	696420	487479	338511	541877	436838	337381	458031	438463	337080	298366	760807	375927	368311	711921	361760	441158	584871	362198	482292	490687	282982	639112	496765	620216	819461	509778	729073	470853	572797	334885	597566	473520	522654	505110	612587	331030	814946	680690	582310	592178	396860	271863	498873	667092	459920	384596	390593	617328	405400
A0A0D3BT65	Filtered	Filtered	Filtered	Filtered	Filtered	Filtered	555.244	Filtered	2703.75	1330.05	2024.64	645.598	1800.72	565.111	894.404	1595.09	174.891	642.908	292.026	439.408	398.505	548.802	167.273	274.068	905.899	836.455	1002.6	1187.69	513.172	538.149	77.0837	Filtered	897.277	1390.92	1125.73	1134.45	1052.01	1232.18	1280.43	1127.49	Filtered	816.066	535.801	326.804	Filtered	Filtered	Filtered	Filtered	1310.38
A0A0D3BTC0	413966	327471	188603	272812	277877	129103	384698	476724	403231	164398	99429.5	189034	212625	65340	174323	18995.7	198918	174748	322091	387419	234324	140978	136211	164285	149462	204148	207493	143159	55436.7	112565	92519.8	141190	87778.8	200456	154076	382863	104986	198023	803.669	29451.7	461982	607132	550072	495267	414886	547293	335798	287012	390281
A0A0D3BTD3	290408928	Filtered	Filtered	Filtered	Filtered	Filtered	202483824	60704.7	16759343	33500992	Filtered	82828264	102698960	Filtered	120966328	225102240	151224432	196126	Filtered	39643712	Filtered	185641760	151673568	20001.1	210704432	61317364	Filtered	163081760	184472288	Filtered	87998800	253913200	149180272	231485664	230026672	216590	278119456	Filtered	258346336	283524384	65492224	57294292	99978144	12210.2	247900032	101814288	154114928	Filtered	165600
A0A0D3BTG6	612026	463359	592708	394587	796133	659708	663364	396868	172656	399136	451178	437643	593153	299760	500080	349758	345366	592988	569045	647160	623796	499295	536295	369392	317832	605253	459129	347947	345372	535569	434992	428753	440975	417019	557420	616272	429219	618856	401236	666684	573616	407710	344430	217902	265448	348299	414304	473918	518022
A0A0D3BTI4	122493	19527.1	33236.8	22810.3	80359.5	336383	53507.4	143231	Filtered	45751.9	23857.6	37369.8	121812	147799	132103	162648	120275	67282.7	63325.3	48468.6	94161.3	170563	205229	141273	57027.1	33967	50981.3	17547.8	97899	64831.3	105980	191922	32370.4	69412.8	73019.7	51785.7	117978	153672	149539	163909	62944.2	9260.31	1	11890.7	67243.2	87325	109764	118535	62724.9
A0A0D3BTJ1	3.47227e+06	2077855	1.38285e+06	2.58343e+06	2331860	2.07334e+06	1.79054e+06	3248852	1.77426e+06	1217515	2.32531e+06	1.32442e+06	1.78957e+06	2.82201e+06	1.36313e+06	1.77298e+06	1.43654e+06	1.27419e+06	945808	1.13246e+06	1.08483e+06	1.62079e+06	1.39107e+06	1.68197e+06	2.09748e+06	1.25626e+06	1.95913e+06	1212411	1.82314e+06	1.41588e+06	2.02181e+06	1.95533e+06	1.28309e+06	1.99821e+06	2.01051e+06	1.1469e+06	1.63559e+06	1.94246e+06	2248854	2.25864e+06	2.06578e+06	1.51642e+06	1.79487e+06	2.40625e+06	2.80238e+06	1.34892e+06	2850450	3981857	1.55451e+06
A0A0D3BTT9	128471	235734	34731	140635	54560	148379	112117	157982	573234	81808.8	176731	67649	102120	203109	113549	90772.9	58443.4	95453.6	103299	71431	97772.2	120121	72968.7	101087	104659	126781	96048	103451	91354.1	46246	77313.5	146517	46753.9	52514.1	124714	89720.4	159939	144698	53848.9	75338.6	138649	172770	208003	255362	277110	306014	171942	205538	112948
A0A0D3BU13	Filtered	23468.8	7415.37	Filtered	Filtered	Filtered	Filtered	Filtered	297620	173150	69410.3	199846	140759	142399	60775.3	43511	16308.8	54700.1	86134.5	82671.1	41287	12928.9	Filtered	Filtered	7877.64	31953.6	Filtered	24356	Filtered	23785.2	37836.9	23738.5	10476.7	Filtered	1	41382.8	17298	Filtered	7598.13	Filtered	208251	282770	91257.6	181751	259664	151006	107233	155791	33363.3
A0A0D3BU25	229319	65201.6	91284.8	102157	87429.2	225456	45067.5	104457	84900.1	189558	306475	373021	319540	61959.5	433680	437362	321954	354461	226013	263921	116658	217087	291887	70359.9	501831	198761	192748	375157	225981	384499	183916	228759	287134	56886.8	251146	28174.9	67213.1	171898	148717	223346	136158	84833.9	127262	213104	207492	72615	82336.7	167835	29676.6
A0A0D3BU47	Filtered	Filtered	Filtered	Filtered	Filtered	Filtered	Filtered	Filtered	Filtered	47465.7	47273.5	60780.5	46845.2	29182.9	41119.3	56125.2	38162.9	40364.6	32720.3	50397.7	Filtered	48295.7	38776.8	54516.2	43576	54892.1	56009.4	63418	40763.7	85315.9	71574.1	108748	12079.7	21118	19774.9	32497.2	31279.8	Filtered	47370.1	39840.4	Filtered	Filtered	Filtered	Filtered	Filtered	Filtered	19151.9	Filtered	Filtered
A0A0D3BUD2	641607	466031	455288	596680	512199	672786	424557	403168	674717	227328	373123	388062	306113	560434	272459	415184	321056	319390	274014	243757	294810	306077	283948	300452	473191	312201	259391	285003	448116	308130	371326	465369	159937	232420	359759	196000	163739	304692	248882	290283	416062	376931	228830	476988	660346	568899	293102	680324	178869
A0A0D3BUD3	427272	874248	761556	698999	374987	1.13666e+06	2501778	649062	1.07496e+06	1.06195e+06	867452	797968	1.18173e+06	1.16584e+06	183928	629852	373874	569229	357110	398569	232310	425091	348510	287242	683557	774204	761093	1.40629e+06	844935	727488	748812	659355	885143	603191	548059	1.0803e+06	503684	621286	1.02349e+06	852974	2.38019e+06	800109	1.59624e+06	694479	1.72167e+06	855527	1.14368e+06	2.77163e+06	1809241
A0A0D3BUD8	Filtered	9199.25	6015.68	Filtered	Filtered	Filtered	Filtered	Filtered	Filtered	Filtered	Filtered	Filtered	1	Filtered	Filtered	Filtered	Filtered	Filtered	1	Filtered	Filtered	Filtered	Filtered	Filtered	1	Filtered	Filtered	Filtered	Filtered	Filtered	Filtered	Filtered	Filtered	5324.64	Filtered	Filtered	9890.66	Filtered	Filtered	Filtered	4562.07	7002.93	6442.22	5664.59	8212.41	Filtered	12423.5	17181	6008.91
A0A0D3BUK0	8689.55	Filtered	6706.94	Filtered	Filtered	Filtered	Filtered	Filtered	53305.8	11510.7	Filtered	Filtered	Filtered	Filtered	1356.06	Filtered	5189.24	Filtered	26193.8	46559.6	65563.3	Filtered	25615.1	2376.66	Filtered	Filtered	1	18103.9	12673.1	Filtered	2607.55	Filtered	75272.1	Filtered	Filtered	52629.7	2911.15	4572.37	Filtered	Filtered	Filtered	Filtered	Filtered	Filtered	Filtered	Filtered	Filtered	Filtered	41710.7
A0A0D3BUL5	Filtered	Filtered	Filtered	Filtered	Filtered	Filtered	13048.5	Filtered	26600	Filtered	Filtered	Filtered	Filtered	Filtered	Filtered	Filtered	Filtered	Filtered	Filtered	Filtered	Filtered	Filtered	Filtered	Filtered	Filtered	3412.68	Filtered	Filtered	Filtered	Filtered	Filtered	Filtered	Filtered	20318.4	4860.8	14745.7	Filtered	4842.94	Filtered	Filtered	Filtered	Filtered	Filtered	Filtered	Filtered	Filtered	1	Filtered	Filtered
A0A0D3BUQ9	44032.8	64062.1	76239.8	53947.6	86487	162386	35721.7	25357.3	99355.4	27313.3	9843.09	41597.2	37852.4	17959.7	44918.6	21261.2	48052.1	48762.1	66343	60599.3	86567.3	65329.1	77379.2	56761.1	24303.8	40272.3	Filtered	39328.3	22694.5	58339.3	32955.3	40761.7	27765.5	26714.9	Filtered	41998.1	36143	21747.4	29497.7	28139.1	50970.7	42652.2	44790.1	36112.1	28318.9	40000.7	39381.8	29669.9	60500.1
A0A0D3BUR1	300478	181843	214151	294815	246247	505798	193009	223157	315581	129450	187541	115444	95518.2	203211	105025	134424	152172	91368.6	169191	171882	96154	173060	122054	172864	154012	115261	165380	113276	148243	103112	134823	192305	176669	133074	121012	111807	219340	157541	118604	142288	156990	208394	266663	280292	270636	204100	226456	278837	102644
A0A0D3BUT1	1.0277e+06	441950	378230	599029	515688	1.12646e+06	328489	999182	535350	186005	443708	212162	160352	575556	132713	367413	200559	109352	101543	98559.7	77294.1	265121	177773	215357	487857	262658	386480	340960	401546	221384	367642	456356	133998	435088	311775	106413	418736	452974	387999	518432	497809	568355	781936	1.14664e+06	937618	1.0011e+06	775061	1.31656e+06	142045
A0A0D3BUZ8	28328.2	Filtered	8086.08	Filtered	1	11107.3	15560	24817.2	14990.3	22823.5	32692.5	27758.7	21545.1	53135.3	50207.5	32647.9	33788	45528.6	45006.5	52073.5	46527.1	33133.5	43399.1	40431	40648.6	45451.6	41661.2	Filtered	24768.5	30552.8	42184.1	51765.9	47778.9	31373.9	35907	48629.2	38413.6	41472.9	41264.2	49540.7	14474	11682.8	11089.2	Filtered	Filtered	Filtered	Filtered	Filtered	9981.27
A0A0D3BVT4	242188	86892.5	32555.9	24983	20227.7	34930.3	Filtered	97018.2	101950	51587	138342	83985.2	64145.1	175728	42455.1	121123	5274.36	16200.2	5642.9	Filtered	1	16692.1	7224.45	Filtered	125747	66961.2	68832.5	82532.1	84132.7	39240.1	56299.8	36479.5	9322.52	5069.36	2947.56	13677.5	13283.5	13557.4	13087.8	13370	Filtered	Filtered	Filtered	Filtered	Filtered	Filtered	Filtered	Filtered	Filtered
A0A0D3BW18	178441	67102.3	230404	118264	326706	473533	234287	106310	289853	263165	113303	201465	133002	130930	204462	79361.7	119354	236116	373508	335358	352766	87735.5	161693	120846	136610	247073	117212	182766	11504.9	194254	258888	80956.8	245490	65475	106005	273230	104902	124219	56632.9	78029.5	175999	232045	70050.2	73461	128575	152070	139616	188095	248353
A0A0D3BW40	8720255	6374999	4966639	6.55802e+06	6033938	5171029	3.85372e+06	8934918	3804832	1.51666e+06	3.66414e+06	1.65998e+06	1.92355e+06	3.74146e+06	1.83344e+06	3.04599e+06	2.93893e+06	1.84866e+06	1.53186e+06	1.71592e+06	1.86953e+06	3428764	2.88608e+06	3.53009e+06	3.85707e+06	2.34459e+06	4.19964e+06	2.49678e+06	3.05426e+06	2.40286e+06	3.00714e+06	4.0951e+06	2189004	4687689	3.6336e+06	2.03807e+06	3749800	4498389	4193653	4.58454e+06	3.29193e+06	2.86043e+06	4472443	4864201	5.18623e+06	4316294	6.24306e+06	6.1782e+06	3.15646e+06
A0A0D3BW44	881109	704030	1.04297e+06	1.01974e+06	1.06723e+06	1.06264e+06	957856	497916	373091	295841	160546	435664	465991	352842	548609	336184	549717	658659	831724	1.00774e+06	953348	588960	604016	594833	335190	629231	447297	335619	311927	869637	368404	574202	731492	423309	638597	881599	697072	462774	521894	667465	705114	959467	504533	543421	360417	506806	586821	555888	869206
A0A0D3BW75	Filtered	78747	Filtered	Filtered	Filtered	Filtered	Filtered	Filtered	Filtered	36469.5	99157.3	105682	104126	Filtered	31497	96339.7	80095.2	36898.7	71342.2	49587.8	29880	50754.6	61971.1	53974.8	144578	60720.2	96172.6	114066	82661.5	96193.6	76937.4	90673.6	57128.2	59909.5	Filtered	24660	43506.9	45497.3	37659.3	Filtered	Filtered	123084	148310	155345	102039	98786.2	124921	Filtered	18291.1
A0A0D3BW99;A0A0D3CVD2;A0A0D3DV40	Filtered	33918.4	Filtered	24229.8	11638.4	44862	25379.2	31782.6	3987.54	20129.1	19330.8	14841.5	14826.5	15161.3	16424.4	3120.53	7776.47	7763.23	7174.99	8577.05	9015.64	4545.22	17548.8	4154.19	Filtered	13180.5	Filtered	Filtered	8684.9	1	19590.5	7707.31	Filtered	6120.6	6645.38	Filtered	4678.9	7780.54	11630.9	4455.47	19138.8	27855	21922	Filtered	41866.6	71600.3	58173.7	33733.5	5579.04
A0A0D3BWE5;A0A0D3CV53	Filtered	Filtered	Filtered	Filtered	Filtered	Filtered	Filtered	Filtered	30412.2	11241.2	Filtered	Filtered	Filtered	Filtered	Filtered	Filtered	Filtered	Filtered	Filtered	Filtered	Filtered	Filtered	Filtered	Filtered	Filtered	Filtered	Filtered	Filtered	Filtered	Filtered	61066.7	Filtered	Filtered	Filtered	Filtered	Filtered	Filtered	Filtered	Filtered	Filtered	Filtered	Filtered	Filtered	Filtered	Filtered	Filtered	Filtered	Filtered	Filtered
A0A0D3BWG2;A0A0D3DUU3	125237	44733.5	101159	43129.4	82865.1	603707	65997.9	56876.2	202355	166639	41327.2	49794.3	39369.4	51570.7	43030.3	68766.1	30578	31344.6	27140.9	30169.6	49648	41466.5	42751.2	34550.4	52882.2	40243.5	59996.8	35693.7	25039.6	72466.9	181712	60410.1	19917.8	42454.8	33753.7	27741.1	42126.4	35062	32085.5	27049.7	Filtered	79931.7	86933.5	114133	110180	87201.6	105945	125083	Filtered
A0A0D3BWL2	111371	70301.9	238447	227018	Filtered	552752	50365.3	1	48200.9	107258	1	123383	3816.65	181016	117443	171649	3047.5	201647	71643	348294	227013	21649.3	19050.6	1	158640	45189.4	1	174803	112397	1	145382	Filtered	199389	164827	80550.8	125397	55063.7	75252.3	68396.9	106354	199572	105111	53446.9	1	28120.6	37407.3	1.05633	1.26557	113654
A0A0D3BWN2	309867	113542	241483	283117	302753	548799	199637	160757	35164.2	84854.9	101229	56369.4	110324	162999	98562.9	188965	159883	71440.1	84469	18104.7	59220.9	151121	45606.4	Filtered	63337.3	154163	82512	102543	40227.7	163060	161168	104484	113651	162929	132706	131101	155400	Filtered	111973	245348	148614	204055	145298	155427	277422	254538	158859	160627	192345
A0A0D3BWP8	302912	496318	157492	266036	224969	234402	201336	367950	554132	367952	622577	371995	424240	510130	264391	357022	335255	306640	277330	310726	250734	383895	342366	401513	533270	320930	418322	405206	371916	295829	430497	385536	313511	536346	448465	359660	449807	566674	492975	542456	286920	213339	277555	334095	418856	338673	337031	468769	407848
[truncated: 1,227 more rows]
[truncated: 23 more columns]

## Sheet: Sig_Candidates
Comparison (group1/group2)	Group	ProteinGroups	AVG Log2 Ratio	Absolute AVG Log2 Ratio	Pvalue	Qvalue	# of Ratios	UniProtIds	Genes	ProteinDescriptions	ProteinNames	# Unique Total Peptides	% Change	Ratio	Condition Numerator	Condition Denominator	GO Cellular Component	GO Molecular Function	GO Biological Process
[truncated: 132,223 more rows]

[truncated: 12 more sheets: K2_ENvED, K3_ENvED, K4_ENvED, K5_ENvED, K6_ENvED, K7_ENvED, K8_ENvED, K9_ENvED, K10_ENvED, Sig_Candidate_Summary, Sig_Candidate_Grp1, Sig_Candidate_Grp2]
