# Supplementary material for: Systems-level proteomics and metabolomics reveals the diel molecular landscape of diverse kale cultivars
Source: Front Plant Sci. 2023 Jul 28;14:1170448. doi: 10.3389/fpls.2023.1170448 (PMC10421703; doi:10.3389/fpls.2023.1170448)
Supplement: Supplemental Data Sheet 6 — Pathway enrichment analysis using the Plant Metabolic Network (PMN; https://plantcyc.org/. [file Table_6.xlsx]

## Sheet: Read_me
Pathway Summary	Summary of enriched pathways
Group_I	Enriched pathways generated with significantly changing protein in Group I (Fisher's exact test < 0.01)
Group_II	Enriched pathways generated with significantly changing protein in Group II (Fisher's exact test < 0.01)

## Sheet: Pathway_Summary
Enriched Pathways Group I	Enriched Pathways Group II
Photosynthesis	Photosynthesis
oxygenic photosynthesis	oxygenic photosynthesis
Calvin-Benson-Bassham cycle	Calvin-Benson-Bassham cycle
Autotrophic CO2 Fixation	Autotrophic CO2 Fixation
CO2 Fixation	gluconeogenesis III
S-adenosyl-L-methionine cycle II	gluconeogenesis I
S-adenosyl-L-methionine Biosynthesis	photosynthesis light reactions
C1 Compound Utilization and Assimilation	Generation of Precursor Metabolites and Energy
Carboxylate Degradation	CO2 Fixation
L-methionine degradation I (to L-homocysteine)	Gluconeogenesis
Proteinogenic Amino Acid Biosynthesis	C1 Compound Utilization and Assimilation
L-methionine Degradation	Nitrogen Compound Metabolism
Generation of Precursor Metabolites and Energy	Proteinogenic Amino Acid Biosynthesis
Amino Acid Biosynthesis	Glycolysis
tetrapyrrole biosynthesis I (from glutamate)	Amino Acid Biosynthesis
gluconeogenesis III	superpathway of cytosolic glycolysis (plants), pyruvate dehydrogenase and TCA cycle
Cofactor, Carrier, and Vitamin Biosynthesis	sucrose biosynthesis I (from photosynthesis)
gluconeogenesis I	Ammonia Assimilation
L-serine Biosynthesis	superpathway of ammonia assimilation (plants)
Enzyme Cofactor Biosynthesis	glycolysis II (from fructose 6-phosphate)
nitrate reduction II (assimilatory)	Carboxylate Degradation
Nitrate Reduction	superpathway of branched chain amino acid biosynthesis
Porphyrin Compound Biosynthesis	Sucrose Biosynthesis
Tetrapyrrole Biosynthesis	L-asparagine Biosynthesis
superpathway of branched chain amino acid biosynthesis	L-asparagine biosynthesis III (tRNA-dependent)
Rubisco shunt	L-glutamine Degradation
glycolysis II (from fructose 6-phosphate)	Aminoacyl-tRNA Charging
superpathway of cytosolic glycolysis (plants), pyruvate dehydrogenase and TCA cycle	glutaminyl-tRNAgln biosynthesis via transamidation
Gluconeogenesis	L-glutamine degradation I
sucrose biosynthesis I (from photosynthesis)	ammonia assimilation cycle I
photorespiration	tetrapyrrole biosynthesis I (from glutamate)
pyruvate decarboxylation to acetyl CoA	glycolysis IV (plant cytosol)
Glycolysis	ammonia assimilation cycle II
superpathay of heme b biosynthesis from glutamate	Carbohydrate Degradation
Heme b Biosynthesis	L-citrulline biosynthesis
Sucrose Biosynthesis	superpathway of anaerobic sucrose degradation
glycolysis I (from glucose 6-phosphate)	nitrate reduction II (assimilatory)
L-glutamine Biosynthesis	Nitrate Reduction
L-glutamine biosynthesis I	Inorganic Nutrient Metabolism
	glycolysis I (from glucose 6-phosphate)
	Porphyrin Compound Biosynthesis
	Tetrapyrrole Biosynthesis
	superpathway of L-citrulline metabolism
	Sugar Degradation
	Enzyme Cofactor Biosynthesis
	S-adenosyl-L-methionine biosynthesis
	Sucrose Degradation
	pyruvate decarboxylation to acetyl CoA
	Degradation/Utilization/Assimilation
	Other Amino Acid Biosynthesis
	superpathay of heme b biosynthesis from glutamate
	Heme b Biosynthesis
	L-methionine degradation I (to L-homocysteine)

## Sheet: Group_I
	Pathways	p-values	Matches	Compounds of pathway
1	Photosynthesis	1.66415e-07	AGT1
			AT2G35120
			AT4G37930
			rbcS1A
			AT1G30380
			AT5G64040
			PsaE-1
			PsbP
			GapA-1
			AT3G04790
			CP12-2
			AT3G60750
			AT4G38970
			AT2G21330
			PGK
2	oxygenic photosynthesis	1.5436e-06	GapA-1	E-
			AT3G04790	oxygen
			CP12-2	a plastoquinone
			AT3G60750	a plastoquinol
			AT4G38970	an oxidized ferredoxin [iron-sulfur] cluster
			AT2G21330	a reduced plastocyanin
			PGK	hν
			rbcS1A	an oxidized plastocyanin
			AT1G30380	a reduced ferredoxin [iron-sulfur] cluster
			AT5G64040	CO2
			PsaE-1	3-phospho-D-glycerate
			PsbP	glycerone phosphate
				β-D-fructose 1,6-bisphosphate
				β-D-fructofuranose 6-phosphate
				D-erythrose 4-phosphate
				D-sedoheptulose 7-phosphate
				H2O
				D-sedoheptulose 1,7-bisphosphate
				D-xylulose 5-phosphate
				ADP
				D-ribulose-1,5-bisphosphate
				ATP
				D-ribulose 5-phosphate
				D-ribose 5-phosphate
				3-phospho-D-glyceroyl-phosphate
				NADPH
				H+
				D-glyceraldehyde 3-phosphate
				phosphate
				NADP+
3	Calvin-Benson-Bassham cycle	3.16445e-06	GapA-1	CO2
			AT3G04790	3-phospho-D-glycerate
			CP12-2	glycerone phosphate
			AT3G60750	β-D-fructose 1,6-bisphosphate
			AT4G38970	β-D-fructofuranose 6-phosphate
			AT2G21330	D-erythrose 4-phosphate
			PGK	D-sedoheptulose 7-phosphate
			rbcS1A	H2O
				D-sedoheptulose 1,7-bisphosphate
				D-xylulose 5-phosphate
				ADP
				D-ribulose-1,5-bisphosphate
				ATP
				D-ribulose 5-phosphate
				D-ribose 5-phosphate
				3-phospho-D-glyceroyl-phosphate
				NADPH
				H+
				D-glyceraldehyde 3-phosphate
				phosphate
				NADP+
4	Autotrophic CO2 Fixation	3.16445e-06	GapA-1
			AT3G04790
			CP12-2
			AT3G60750
			AT4G38970
			AT2G21330
			PGK
			rbcS1A
5	CO2 Fixation	8.04681e-06	GapA-1
			AT3G04790
			CP12-2
			AT3G60750
			AT4G38970
			AT2G21330
			PGK
			rbcS1A
6	S-adenosyl-L-methionine cycle II	3.50829e-05	AT5G17920	diphosphate
			AT4G13940	phosphate
			AT4G01850	ATP
			AT3G17390	adenosine
				H2O
				H+
				a methylated methyl donor
				S-adenosyl-L-homocysteine
				S-adenosyl-L-methionine
				a demethylated methyl donor
				L-methionine
				tetrahydropteroyl tri-L-glutamate
				5-methyltetrahydropteroyl tri-L-glutamate
				L-homocysteine
7	S-adenosyl-L-methionine Biosynthesis	3.50829e-05	AT5G17920
			AT4G13940
			AT4G01850
			AT3G17390
8	C1 Compound Utilization and Assimilation	4.88372e-05	GapA-1
			AT3G04790
			CP12-2
			AT3G60750
			AT4G38970
			AT2G21330
			PGK
			rbcS1A
9	Carboxylate Degradation	8.62719e-05	AT1G34430
			AT1G54220
			AT3G52200
			AT1G77490
			AT4G08390
			AT3G16910
10	L-methionine degradation I (to L-homocysteine)	0.000250923	AT4G13940	diphosphate
			AT4G01850	phosphate
			AT3G17390	ATP
				L-methionine
				adenosine
				L-homocysteine
				H2O
				H+
				a methylated methyl donor
				S-adenosyl-L-homocysteine
				S-adenosyl-L-methionine
				a demethylated methyl donor
11	Proteinogenic Amino Acid Biosynthesis	0.000363933	GLN1;2
			GLN1;4
			AT4G32915
			AGT1
			AT2G35120
			AT4G37930
			rbcS1A
			AT3G23940
			AK-HSDH2
			AT3G58610
			AT4G01850
			AT3G17390
			AT5G17920
			AT1G17745
			AT2G43090
			IPMS1
12	L-methionine Degradation	0.000431533	AT4G13940
			AT4G01850
			AT3G17390
13	Generation of Precursor Metabolites and Energy	0.000500601	c-NAD-MDH1
			AT5G08530
			AT3G03100
			AT1G47260
			AT2G27730
			AGT1
			AT2G35120
			AT4G37930
			rbcS1A
			AT5G42450
			COXVb
			AT1G34430
			AT1G54220
			AT3G52200
			AT1G30380
			AT5G64040
			PsaE-1
			PsbP
			AT3G04790
			AT3G60750
			PKp2
			CP12-2
			PGK
			AT2G20420
			AT4G38970
			AT2G21330
			GapA-1
14	Amino Acid Biosynthesis	0.000541394	AT2G43090
			GLN1;2
			GLN1;4
			AT4G32915
			AGT1
			AT2G35120
			AT4G37930
			rbcS1A
			AT3G23940
			AK-HSDH2
			AT3G58610
			AT4G01850
			AT3G17390
			IPMS1
			APS1
			AT5G17920
			AT1G17745
15	tetrapyrrole biosynthesis I (from glutamate)	0.00100027	HEMA1	uroporphyrinogen-III
			HEMB1	preuroporphyrinogen
			HEMC	ammonium
				porphobilinogen
				H2O
				5-aminolevulinate
				H+
				NADPH
				(S)-4-amino-5-oxopentanoate
				NADP+
				AMP
				diphosphate
				an L-glutamyl-[tRNAGlu]
				a tRNAglu
				L-glutamate
				ATP
16	gluconeogenesis III	0.00132209	c-NAD-MDH1	2,3-diphospho-D-glycerate
			PGK	a [protein]-L-histidine
			CP12-2	a [protein]-Nπ-phospho-L-histidine
			GapA-1	2/3-phospho-D-glycerate
			AT4G38970	β-D-fructose 1,6-bisphosphate
			AT2G21330	3-phospho-D-glyceroyl-phosphate
				3-phospho-D-glycerate
				2-phospho-D-glycerate
				glycerone phosphate
				D-glyceraldehyde 3-phosphate
				ADP
				pyruvate
				hydrogencarbonate
				ATP
				GDP
				phosphoenolpyruvate
				CO2
				GTP
				phosphate
				D-glucopyranose
				H2O
				NADH
				oxaloacetate
				H+
				(S)-malate
				NAD+
				β-D-fructofuranose 6-phosphate
				D-glucopyranose 6-phosphate
17	Cofactor, Carrier, and Vitamin Biosynthesis	0.00133367	AT3G48420
			AT5G17920
			AT4G13940
			AT4G01850
			AT3G17390
			AtCoaD
			HEMA1
			HEMB1
			HEMC
			AT4G00930
			AT5G08530
			AT3G03100
			AT1G47260
			AT2G27730
			AT3G11950
			AT2G35120
			AT4G37930
			AT1G74470
			AT4G22220
18	gluconeogenesis I	0.00146269	c-NAD-MDH1	β-D-fructose 1,6-bisphosphate
			PGK	3-phospho-D-glyceroyl-phosphate
			CP12-2	3-phospho-D-glycerate
			GapA-1	2-phospho-D-glycerate
			AT4G38970	ADP
			AT2G21330	AMP
				phosphoenolpyruvate
				phosphate
				H2O
				ATP
				NADPH
				NADP+
				glycerone phosphate
				D-glyceraldehyde 3-phosphate
				pyruvate
				CO2
				NADH
				oxaloacetate
				H+
				(S)-malate
				NAD+
				β-D-fructofuranose 6-phosphate
				D-glucopyranose 6-phosphate
19	L-serine Biosynthesis	0.00146295	AGT1
			AT2G35120
			AT4G37930
			rbcS1A
			AT1G17745
20	Enzyme Cofactor Biosynthesis	0.00152152	AT3G48420
			AT5G17920
			AT4G13940
			AT4G01850
			AT3G17390
			HEMA1
			HEMB1
			HEMC
			AT5G08530
			AT3G03100
			AT1G47260
			AT2G27730
			AT4G22220
21	nitrate reduction II (assimilatory)	0.00189778	NiR	NADH
			GLN1;2	nitrate
			GLN1;4	NAD+
				phosphate
				ADP
				L-glutamine
				L-glutamate
				ATP
				H+
				a reduced ferredoxin [iron-sulfur] cluster
				nitrite
				ammonium
				H2O
				an oxidized ferredoxin [iron-sulfur] cluster
22	Nitrate Reduction	0.00189778	NiR
			GLN1;2
			GLN1;4
23	Porphyrin Compound Biosynthesis	0.00211211	AT1G74470
			HEMA1
			HEMB1
			HEMC
			GUN5
24	Tetrapyrrole Biosynthesis	0.00211211	AT1G74470
			HEMA1
			HEMB1
			HEMC
			GUN5
25	superpathway of branched chain amino acid biosynthesis	0.00262873	AT3G23940	NADH
			AT3G58610	NAD+
			AT2G43090	L-leucine
			IPMS1	coenzyme A
				(2S)-2-isopropylmalate
				acetyl-CoA
				4-methyl-2-oxopentanoate
				(2S)-2-isopropyl-3-oxosuccinate
				2-isopropylmaleate
				(2R,3S)-3-isopropylmalate
				3-methyl-2-oxobutanoate
				L-valine
				(2R)-2,3-dihydroxy-3-methylbutanoate
				(S)-2-acetolactate
				(S)-3-methyl-2-oxopentanoate
				L-glutamate
				L-isoleucine
				2-oxoglutarate
				NADPH
				(R)-2,3-dihydroxy-3-methylpentanoate
				NADP+
				CO2
				(S)-2-aceto-2-hydroxybutanoate
				pyruvate
				L-threonine
				ammonium
				2-oxobutanoate
				H+
				H2O
				2-iminobutanoate
				(2Z)-2-aminobut-2-enoate
26	Rubisco shunt	0.00264805	PKp2	CO2
			CP12-2	D-erythrose 4-phosphate
			AT3G04790	β-D-fructofuranose 6-phosphate
			AT3G60750	D-sedoheptulose 7-phosphate
			rbcS1A	D-glyceraldehyde 3-phosphate
				D-ribose 5-phosphate
				D-xylulose 5-phosphate
				D-ribulose-1,5-bisphosphate
				D-ribulose 5-phosphate
				ADP
				H+
				pyruvate
				ATP
				H2O
				phosphoenolpyruvate
				3-phospho-D-glycerate
				2-phospho-D-glycerate
27	glycolysis II (from fructose 6-phosphate)	0.00279134	AT4G38970	2,3-diphospho-D-glycerate
			AT2G21330	a [protein]-L-histidine
			CP12-2	a [protein]-Nπ-phospho-L-histidine
			GapA-1	2/3-phospho-D-glycerate
			PGK	NADH
			PKp2	3-phospho-D-glyceroyl-phosphate
				NAD+
				D-glyceraldehyde 3-phosphate
				glycerone phosphate
				ADP
				AMP
				phosphoenolpyruvate
				H+
				pyruvate
				ATP
				phosphate
				β-D-fructofuranose 6-phosphate
				β-D-fructose 1,6-bisphosphate
				H2O
				3-phospho-D-glycerate
				2-phospho-D-glycerate
28	superpathway of cytosolic glycolysis (plants), pyruvate dehydrogenase and TCA cycle	0.00324287	c-NAD-MDH1	thiamine diphosphate
			AT2G20420	2-(α-hydroxyethyl)thiamine diphosphate
			PKp2	a [2-oxoglutarate dehydrogenase E2 protein] N6-lipoyl-L-lysine
			PGK	a [2-oxoglutarate dehydrogenase E2 protein] N6-S-succinyldihydrolipoyl-L-lysine
			CP12-2	a [2-oxoglutarate dehydrogenase E2 protein] N6-dihydrolipoyl-L-lysine
			AT1G34430	E-
			AT1G54220	a [pyruvate dehydrogenase E2 protein] N6-dihydrolipoyl-L-lysine
			AT3G52200	a [pyruvate dehydrogenase E2 protein] N6-S-acetyldihydrolipoyl-L-lysine
				a [pyruvate dehydrogenase E2 protein] N6-lipoyl-L-lysine
				β-D-fructofuranose 6-phosphate
				diphosphate
				β-D-fructose 1,6-bisphosphate
				glycerone phosphate
				3-phospho-D-glyceroyl-phosphate
				2-phospho-D-glycerate
				phosphoenolpyruvate
				pyruvate
				NADPH
				3-phospho-D-glycerate
				NADP+
				D-glyceraldehyde 3-phosphate
				phosphate
				ADP
				ATP
				succinyl-CoA
				coenzyme A
				acetyl-CoA
				H2O
				cis-aconitate
				citrate
				2-oxoglutarate
				CO2
				D-threo-isocitrate
				NADH
				oxaloacetate
				H+
				(S)-malate
				NAD+
				fumarate
				an electron-transfer quinol
				an electron-transfer quinone
				succinate
29	S-adenosyl-L-methionine biosynthesis	0.00328961	AT4G01850	diphosphate
			AT3G17390	phosphate
				S-adenosyl-L-methionine
				ATP
				L-methionine
				H2O
30	Gluconeogenesis	0.00329951	c-NAD-MDH1
			PGK
			CP12-2
			GapA-1
			AT4G38970
			AT2G21330
31	sucrose biosynthesis I (from photosynthesis)	0.00362807	AT4G38970	a phosphorylated phosphoglucomutase
			AT2G21330	α-glucose 1,6-bisphosphate
			CP12-2	a phosphoglucomutase
			GapA-1	UDP
			PGK	sucrose
				sucrose 6F-phosphate
				ADP
				3-phospho-D-glycerate
				ATP
				NADH
				3-phospho-D-glyceroyl-phosphate
				NAD+
				D-glyceraldehyde 3-phosphate
				glycerone phosphate
				phosphate
				β-D-fructose 1,6-bisphosphate
				H2O
				diphosphate
				UDP-α-D-glucose
				H+
				UTP
				α-D-glucopyranose 1-phosphate
				β-D-fructofuranose 6-phosphate
				D-glucopyranose 6-phosphate
32	photorespiration	0.0045895	AGT1	a [glycine-cleavage complex H protein] N6-[(R)-lipoyl]-L-lysine
			AT2G35120	a [glycine-cleavage complex H protein] N6-aminomethyldihydrolipoyl-L-lysine
			AT4G37930	a [glycine-cleavage complex H protein] N6-dihydrolipoyl-L-lysine
			rbcS1A	D-ribulose-1,5-bisphosphate
				phosphate
				2-phosphoglycolate
				hydrogen peroxide
				glycolate
				oxygen
				H2O
				ADP
				3-phospho-D-glycerate
				ATP
				L-glutamate
				2-oxoglutarate
				H+
				(R)-glycerate
				NADH
				CO2
				ammonium
				a 5,10-methylenetetrahydrofolate
				a tetrahydrofolate
				NAD+
				L-serine
				glyoxylate
				glycine
				hydroxypyruvate
33	pyruvate decarboxylation to acetyl CoA	0.00488324	AT1G34430	thiamine diphosphate
			AT1G54220	2-(α-hydroxyethyl)thiamine diphosphate
			AT3G52200	coenzyme A
				acetyl-CoA
				NADH
				a [pyruvate dehydrogenase E2 protein] N6-dihydrolipoyl-L-lysine
				NAD+
				CO2
				a [pyruvate dehydrogenase E2 protein] N6-S-acetyldihydrolipoyl-L-lysine
				pyruvate
				a [pyruvate dehydrogenase E2 protein] N6-lipoyl-L-lysine
				H+
34	Glycolysis	0.00524127	PKp2
			PGK
			CP12-2
			AT4G38970
			AT2G21330
			GapA-1
35	superpathay of heme b biosynthesis from glutamate	0.0070505	HEMA1	preuroporphyrinogen
			HEMB1	ammonium
			HEMC	porphobilinogen
				5-aminolevulinate
				NADPH
				(S)-4-amino-5-oxopentanoate
				NADP+
				AMP
				diphosphate
				an L-glutamyl-[tRNAGlu]
				a tRNAglu
				L-glutamate
				ATP
				hydrogen peroxide
				Fe2+
				protoporphyrin IX
				protoheme
				uroporphyrinogen-III
				H2O
				CO2
				protoporphyrinogen IX
				coproporphyrinogen III
				oxygen
				H+
36	Heme b Biosynthesis	0.0070505	HEMA1
			HEMB1
			HEMC
37	Sucrose Biosynthesis	0.00876729	AT4G38970
			AT2G21330
			CP12-2
			GapA-1
			PGK
38	glycolysis I (from glucose 6-phosphate)	0.00946623	AT4G38970	2,3-diphospho-D-glycerate
			AT2G21330	a [protein]-L-histidine
			CP12-2	a [protein]-Nπ-phospho-L-histidine
			PGK	2/3-phospho-D-glycerate
			PKp2	NADH
				3-phospho-D-glyceroyl-phosphate
				NAD+
				D-glyceraldehyde 3-phosphate
				glycerone phosphate
				ADP
				AMP
				phosphoenolpyruvate
				H+
				pyruvate
				ATP
				phosphate
				β-D-fructose 1,6-bisphosphate
				H2O
				3-phospho-D-glycerate
				2-phospho-D-glycerate
				β-D-fructofuranose 6-phosphate
				D-glucopyranose 6-phosphate
39	L-glutamine Biosynthesis	0.0109866	GLN1;2
			GLN1;4
40	L-glutamine biosynthesis I	0.0109866	GLN1;2	phosphate
			GLN1;4	ADP
				L-glutamine
				H+
				ammonium
				L-glutamate
				ATP

## Sheet: Group_II
	Pathways	p-values	Matches	Compounds of pathway
1	Photosynthesis	3.61944e-14	AGT1
			AT4G37930
			rbcS1A
			AT5G04140
			AT3G27740
			AT1G30380
			AT5G64040
			PsaG
			PsaE-1
			PsaP
			PsbS
			PsbQ-1
			PsbP
			PsbR
			psbX
			GapA-1
			CP12-2
			AT4G38970
			AT2G21330
			AT3G52930
			AT2G21170
			AT3G12780
			PGK
2	oxygenic photosynthesis	1.23167e-12	GapA-1	E-
			CP12-2	oxygen
			AT4G38970	a plastoquinone
			AT2G21330	a plastoquinol
			AT3G52930	an oxidized ferredoxin [iron-sulfur] cluster
			AT2G21170	a reduced plastocyanin
			AT3G12780	hν
			PGK	an oxidized plastocyanin
			rbcS1A	a reduced ferredoxin [iron-sulfur] cluster
			AT1G30380	CO2
			AT5G64040	3-phospho-D-glycerate
			PsaG	glycerone phosphate
			PsaE-1	β-D-fructose 1,6-bisphosphate
			PsaP	β-D-fructofuranose 6-phosphate
			PsbS	D-erythrose 4-phosphate
			PsbQ-1	D-sedoheptulose 7-phosphate
			PsbP	H2O
			PsbR	D-sedoheptulose 1,7-bisphosphate
			psbX	D-xylulose 5-phosphate
				ADP
				D-ribulose-1,5-bisphosphate
				ATP
				D-ribulose 5-phosphate
				D-ribose 5-phosphate
				3-phospho-D-glyceroyl-phosphate
				NADPH
				H+
				D-glyceraldehyde 3-phosphate
				phosphate
				NADP+
3	Calvin-Benson-Bassham cycle	6.04453e-07	GapA-1	CO2
			CP12-2	3-phospho-D-glycerate
			AT4G38970	glycerone phosphate
			AT2G21330	β-D-fructose 1,6-bisphosphate
			AT3G52930	β-D-fructofuranose 6-phosphate
			AT2G21170	D-erythrose 4-phosphate
			AT3G12780	D-sedoheptulose 7-phosphate
			PGK	H2O
			rbcS1A	D-sedoheptulose 1,7-bisphosphate
				D-xylulose 5-phosphate
				ADP
				D-ribulose-1,5-bisphosphate
				ATP
				D-ribulose 5-phosphate
				D-ribose 5-phosphate
				3-phospho-D-glyceroyl-phosphate
				NADPH
				H+
				D-glyceraldehyde 3-phosphate
				phosphate
				NADP+
4	Autotrophic CO2 Fixation	6.04453e-07	GapA-1
			CP12-2
			AT4G38970
			AT2G21330
			AT3G52930
			AT2G21170
			AT3G12780
			PGK
			rbcS1A
5	gluconeogenesis III	6.60136e-07	c-NAD-MDH1	2,3-diphospho-D-glycerate
			PCK1	a [protein]-L-histidine
			AT2G21170	a [protein]-Nπ-phospho-L-histidine
			AT3G12780	2/3-phospho-D-glycerate
			PGK	β-D-fructose 1,6-bisphosphate
			CP12-2	3-phospho-D-glyceroyl-phosphate
			GapA-1	3-phospho-D-glycerate
			AT4G38970	2-phospho-D-glycerate
			AT2G21330	glycerone phosphate
			AT3G52930	D-glyceraldehyde 3-phosphate
				ADP
				pyruvate
				hydrogencarbonate
				ATP
				GDP
				phosphoenolpyruvate
				CO2
				GTP
				phosphate
				D-glucopyranose
				H2O
				NADH
				oxaloacetate
				H+
				(S)-malate
				NAD+
				β-D-fructofuranose 6-phosphate
				D-glucopyranose 6-phosphate
6	gluconeogenesis I	7.96073e-07	c-NAD-MDH1	β-D-fructose 1,6-bisphosphate
			AT2G21170	3-phospho-D-glyceroyl-phosphate
			PCK1	3-phospho-D-glycerate
			AT3G12780	2-phospho-D-glycerate
			PGK	ADP
			CP12-2	AMP
			GapA-1	phosphoenolpyruvate
			AT4G38970	phosphate
			AT2G21330	H2O
			AT3G52930	ATP
				NADPH
				NADP+
				glycerone phosphate
				D-glyceraldehyde 3-phosphate
				pyruvate
				CO2
				NADH
				oxaloacetate
				H+
				(S)-malate
				NAD+
				β-D-fructofuranose 6-phosphate
				D-glucopyranose 6-phosphate
7	photosynthesis light reactions	9.55886e-07	AT1G30380	E-
			AT5G64040	H2O
			PsaG	oxygen
			PsaE-1	NADPH
			PsaP	NADP+
			PsbS	H+
			PsbQ-1	a plastoquinone
			PsbP	a plastoquinol
			PsbR	an oxidized ferredoxin [iron-sulfur] cluster
			psbX	a reduced plastocyanin
				hν
				an oxidized plastocyanin
				a reduced ferredoxin [iron-sulfur] cluster
8	Generation of Precursor Metabolites and Energy	1.40338e-06	c-NAD-MDH1
			AT5G08530
			AT2G02050
			AT3G03100
			AT1G47260
			AGT1
			AT4G37930
			rbcS1A
			AT5G04140
			COXVb
			AT1G34430
			AT1G54220
			AT3G52200
			AT3G27740
			AT1G30380
			AT5G64040
			PsaG
			PsaE-1
			PsaP
			PsbS
			PsbQ-1
			PsbP
			PsbR
			psbX
			CP12-2
			AT3G12780
			PGK
			AT2G21170
			AT3G52930
			AT1G12000
			AT2G20420
			AT4G38970
			AT2G21330
			GapA-1
			PCK1
9	CO2 Fixation	1.75628e-06	GapA-1
			CP12-2
			AT4G38970
			AT2G21330
			AT3G52930
			AT2G21170
			AT3G12780
			PGK
			rbcS1A
10	Gluconeogenesis	3.60593e-06	c-NAD-MDH1
			PCK1
			AT2G21170
			AT3G12780
			PGK
			CP12-2
			GapA-1
			AT4G38970
			AT2G21330
			AT3G52930
11	C1 Compound Utilization and Assimilation	1.37195e-05	GapA-1
			CP12-2
			AT4G38970
			AT2G21330
			AT3G52930
			AT2G21170
			AT3G12780
			PGK
			rbcS1A
12	Nitrogen Compound Metabolism	3.46589e-05	GLN1;2
			GLN1;4
			NiR
			AT5G04140
			AT5G53460
			AT3G27740
13	Proteinogenic Amino Acid Biosynthesis	3.72406e-05	GLN1;2
			GLN1;4
			AT4G32915
			AT5G53460
			AT3G27740
			AT5G01410
			AT5G04140
			AGT1
			AT4G37930
			rbcS1A
			AT3G23940
			AT3G58610
			AT2G36880
			AT3G17390
			AT3G61440
			AT1G17745
			AT4G13430
			AT2G43090
			IPMS1
14	Glycolysis	5.91048e-05	AT3G12780
			PGK
			CP12-2
			AT2G21170
			AT3G52930
			AT1G12000
			AT4G38970
			AT2G21330
			GapA-1
15	Amino Acid Biosynthesis	7.22837e-05	AT2G43090
			GLN1;2
			GLN1;4
			AT4G32915
			AT5G53460
			AT3G27740
			AT5G01410
			AT5G04140
			AGT1
			AT4G37930
			rbcS1A
			AT3G23940
			AT3G58610
			AT2G36880
			AT3G17390
			AT4G13430
			IPMS1
			AT3G61440
			APS1
			AT1G17745
16	superpathway of cytosolic glycolysis (plants), pyruvate dehydrogenase and TCA cycle	7.93686e-05	c-NAD-MDH1	thiamine diphosphate
			AT2G20420	2-(α-hydroxyethyl)thiamine diphosphate
			AT3G12780	a [2-oxoglutarate dehydrogenase E2 protein] N6-lipoyl-L-lysine
			PGK	a [2-oxoglutarate dehydrogenase E2 protein] N6-S-succinyldihydrolipoyl-L-lysine
			CP12-2	a [2-oxoglutarate dehydrogenase E2 protein] N6-dihydrolipoyl-L-lysine
			AT2G21170	E-
			AT3G52930	a [pyruvate dehydrogenase E2 protein] N6-dihydrolipoyl-L-lysine
			AT1G12000	a [pyruvate dehydrogenase E2 protein] N6-S-acetyldihydrolipoyl-L-lysine
			AT1G34430	a [pyruvate dehydrogenase E2 protein] N6-lipoyl-L-lysine
			AT1G54220	β-D-fructofuranose 6-phosphate
			AT3G52200	diphosphate
				β-D-fructose 1,6-bisphosphate
				glycerone phosphate
				3-phospho-D-glyceroyl-phosphate
				2-phospho-D-glycerate
				phosphoenolpyruvate
				pyruvate
				NADPH
				3-phospho-D-glycerate
				NADP+
				D-glyceraldehyde 3-phosphate
				phosphate
				ADP
				ATP
				succinyl-CoA
				coenzyme A
				acetyl-CoA
				H2O
				cis-aconitate
				citrate
				2-oxoglutarate
				CO2
				D-threo-isocitrate
				NADH
				oxaloacetate
				H+
				(S)-malate
				NAD+
				fumarate
				an electron-transfer quinol
				an electron-transfer quinone
				succinate
17	sucrose biosynthesis I (from photosynthesis)	0.00012556	AT4G38970	a phosphorylated phosphoglucomutase
			AT2G21330	α-glucose 1,6-bisphosphate
			AT3G52930	a phosphoglucomutase
			CP12-2	UDP
			GapA-1	sucrose
			AT3G12780	sucrose 6F-phosphate
			PGK	ADP
				3-phospho-D-glycerate
				ATP
				NADH
				3-phospho-D-glyceroyl-phosphate
				NAD+
				D-glyceraldehyde 3-phosphate
				glycerone phosphate
				phosphate
				β-D-fructose 1,6-bisphosphate
				H2O
				diphosphate
				UDP-α-D-glucose
				H+
				UTP
				α-D-glucopyranose 1-phosphate
				β-D-fructofuranose 6-phosphate
				D-glucopyranose 6-phosphate
18	Ammonia Assimilation	0.000132085	GLN1;2
			GLN1;4
			AT5G04140
			AT5G53460
19	superpathway of ammonia assimilation (plants)	0.000132085	AT5G04140	NADP+
			GLN1;2	ammonia
			GLN1;4	NADPH
			AT5G53460	H2O
				phosphate
				ADP
				ammonium
				ATP
				NADH
				NAD+
				H+
				a reduced ferredoxin [iron-sulfur] cluster
				L-glutamine
				2-oxoglutarate
				an oxidized ferredoxin [iron-sulfur] cluster
				L-glutamate
20	glycolysis II (from fructose 6-phosphate)	0.000147763	AT4G38970	2,3-diphospho-D-glycerate
			AT2G21330	a [protein]-L-histidine
			AT3G52930	a [protein]-Nπ-phospho-L-histidine
			AT2G21170	2/3-phospho-D-glycerate
			CP12-2	NADH
			GapA-1	3-phospho-D-glyceroyl-phosphate
			AT3G12780	NAD+
			PGK	D-glyceraldehyde 3-phosphate
				glycerone phosphate
				ADP
				AMP
				phosphoenolpyruvate
				H+
				pyruvate
				ATP
				phosphate
				β-D-fructofuranose 6-phosphate
				β-D-fructose 1,6-bisphosphate
				H2O
				3-phospho-D-glycerate
				2-phospho-D-glycerate
21	Carboxylate Degradation	0.000152677	AT1G34430
			AT1G54220
			AT3G52200
			AT3G48990
			AT4G08390
			AT3G16910
22	superpathway of branched chain amino acid biosynthesis	0.000408737	AT3G23940	NADH
			AT3G58610	NAD+
			AT4G13430	L-leucine
			AT2G43090	coenzyme A
			IPMS1	(2S)-2-isopropylmalate
				acetyl-CoA
				4-methyl-2-oxopentanoate
				(2S)-2-isopropyl-3-oxosuccinate
				2-isopropylmaleate
				(2R,3S)-3-isopropylmalate
				3-methyl-2-oxobutanoate
				L-valine
				(2R)-2,3-dihydroxy-3-methylbutanoate
				(S)-2-acetolactate
				(S)-3-methyl-2-oxopentanoate
				L-glutamate
				L-isoleucine
				2-oxoglutarate
				NADPH
				(R)-2,3-dihydroxy-3-methylpentanoate
				NADP+
				CO2
				(S)-2-aceto-2-hydroxybutanoate
				pyruvate
				L-threonine
				ammonium
				2-oxobutanoate
				H+
				H2O
				2-iminobutanoate
				(2Z)-2-aminobut-2-enoate
23	Sucrose Biosynthesis	0.000467602	AT4G38970
			AT2G21330
			AT3G52930
			CP12-2
			GapA-1
			AT3G12780
			PGK
24	L-asparagine Biosynthesis	0.000595567	AT4G32915
			AT5G53460
			AT3G27740
			AT5G01410
			AT5G04140
25	L-asparagine biosynthesis III (tRNA-dependent)	0.000595567	AT4G32915	AMP
			AT5G53460	diphosphate
			AT3G27740	tRNAAsn
			AT5G01410	L-aspartate
			AT5G04140	L-glutamate
				L-glutamine
				H2O
				ADP
				ATP
				an L-aspartyl-[tRNAAsn]
				H+
				phosphate
				an L-asparaginyl-[tRNAAsn]
				a 4-phosphooxy-L-aspartyl-[tRNAAsn]
				ammonium
26	L-glutamine Degradation	0.000595567	AT5G53460
			AT4G32915
			AT3G27740
			AT5G01410
			AT5G04140
27	Aminoacyl-tRNA Charging	0.000595567	AT4G32915
			AT5G53460
			AT3G27740
			AT5G01410
			AT5G04140
28	glutaminyl-tRNAgln biosynthesis via transamidation	0.000595567	AT5G53460	diphosphate
			AT4G32915	AMP
			AT3G27740	a tRNAGln
			AT5G01410	L-glutamate
			AT5G04140	L-glutamine
				H2O
				ADP
				ATP
				an L-glutamyl-[tRNAGln]
				H+
				phosphate
				an L-glutaminyl-[tRNAGln]
				a 5-phosphooxy-L-glutamyl-[tRNAGln]
				ammonium
29	L-glutamine degradation I	0.000595567	AT5G53460	ammonium
			AT4G32915	L-glutamate
			AT3G27740	L-glutamine
			AT5G01410	H2O
			AT5G04140
30	ammonia assimilation cycle I	0.000915127	GLN1;2	H2O
			GLN1;4	NADP+
			AT5G53460	ammonia
				NADPH
				phosphate
				ADP
				ammonium
				ATP
				L-glutamine
				2-oxoglutarate
				NADH
				H+
				NAD+
				L-glutamate
31	tetrapyrrole biosynthesis I (from glutamate)	0.00134642	HEMA1	uroporphyrinogen-III
			GSA1	preuroporphyrinogen
			HEMB1	ammonium
				porphobilinogen
				H2O
				5-aminolevulinate
				H+
				NADPH
				(S)-4-amino-5-oxopentanoate
				NADP+
				AMP
				diphosphate
				an L-glutamyl-[tRNAGlu]
				a tRNAglu
				L-glutamate
				ATP
32	glycolysis IV (plant cytosol)	0.00182399	AT3G12780	β-D-fructofuranose 6-phosphate
			PGK	diphosphate
			CP12-2	β-D-fructose 1,6-bisphosphate
			AT2G21170	glycerone phosphate
			AT3G52930	NADH
			AT1G12000	phosphate
				NAD+
				3-phospho-D-glyceroyl-phosphate
				2-phospho-D-glycerate
				ADP
				phosphoenolpyruvate
				pyruvate
				ATP
				NADPH
				3-phospho-D-glycerate
				H+
				H2O
				NADP+
				D-glyceraldehyde 3-phosphate
33	ammonia assimilation cycle II	0.00188669	AT5G04140	H2O
			GLN1;2	phosphate
			GLN1;4	ADP
				ammonium
				ATP
				H+
				a reduced ferredoxin [iron-sulfur] cluster
				L-glutamine
				2-oxoglutarate
				an oxidized ferredoxin [iron-sulfur] cluster
				L-glutamate
34	Carbohydrate Degradation	0.0019472	AT1G68560
			AT5G10560
			AT1G69200
			SEX4
			AT4G38970
			AT2G21330
			AT3G52930
			AT2G21170
			CP12-2
			GapA-1
			AT3G12780
			PGK
			AT5G62630
35	L-citrulline biosynthesis	0.0020259	AT5G53460	E-
			AT4G32915	ammonium
			AT3G27740	L-glutamine
			AT5G01410	urea
			AT5G04140	L-arginine
				H2O
				2-oxoglutarate
				L-citrulline
				L-ornithine
				carbamoyl phosphate
				ADP
				L-glutamate
				ATP
				NADPH
				γ-L-glutamyl 5-phosphate
				L-glutamate-5-semialdehyde
				phosphate
				NADP+
				(S)-1-pyrroline-5-carboxylate
				H+
				an electron-transfer quinol
				an electron-transfer quinone
				L-proline
36	superpathway of anaerobic sucrose degradation	0.00209075	AT1G69200	2,3-diphospho-D-glycerate
			AT4G38970	a [protein]-L-histidine
			AT2G21330	a [protein]-Nπ-phospho-L-histidine
			AT3G52930	2/3-phospho-D-glycerate
			AT2G21170	a phosphorylated phosphoglucomutase
			CP12-2	α-glucose 1,6-bisphosphate
			GapA-1	a phosphoglucomutase
			AT3G12780	ethanol
			PGK	CO2
				acetaldehyde
				3-phospho-D-glyceroyl-phosphate
				D-glyceraldehyde 3-phosphate
				glycerone phosphate
				AMP
				phosphoenolpyruvate
				phosphate
				β-D-fructose 1,6-bisphosphate
				H2O
				3-phospho-D-glycerate
				2-phospho-D-glycerate
				pyruvate
				NADH
				NAD+
				(S)-lactate
				UDP
				sucrose
				ADP
				β-D-fructofuranose
				ATP
				diphosphate
				UDP-α-D-glucose
				H+
				UTP
				β-D-fructofuranose 6-phosphate
				D-glucopyranose 6-phosphate
				α-D-glucopyranose 1-phosphate
37	nitrate reduction II (assimilatory)	0.00254467	NiR	NADH
			GLN1;2	nitrate
			GLN1;4	NAD+
				phosphate
				ADP
				L-glutamine
				L-glutamate
				ATP
				H+
				a reduced ferredoxin [iron-sulfur] cluster
				nitrite
				ammonium
				H2O
				an oxidized ferredoxin [iron-sulfur] cluster
38	Nitrate Reduction	0.00254467	NiR
			GLN1;2
			GLN1;4
39	Inorganic Nutrient Metabolism	0.00287354	APS1
			GLN1;2
			GLN1;4
			NiR
			AT1G54780
			AT5G04140
			AT5G53460
			AT3G27740
40	glycolysis I (from glucose 6-phosphate)	0.0029922	AT4G38970	2,3-diphospho-D-glycerate
			AT2G21330	a [protein]-L-histidine
			AT2G21170	a [protein]-Nπ-phospho-L-histidine
			CP12-2	2/3-phospho-D-glycerate
			AT3G12780	NADH
			PGK	3-phospho-D-glyceroyl-phosphate
				NAD+
				D-glyceraldehyde 3-phosphate
				glycerone phosphate
				ADP
				AMP
				phosphoenolpyruvate
				H+
				pyruvate
				ATP
				phosphate
				β-D-fructose 1,6-bisphosphate
				H2O
				3-phospho-D-glycerate
				2-phospho-D-glycerate
				β-D-fructofuranose 6-phosphate
				D-glucopyranose 6-phosphate
41	Porphyrin Compound Biosynthesis	0.00330549	HEMA1
			GSA1
			HEMB1
			GUN5
			CHLD
42	L-citrulline Biosynthesis	0.00330549	AT5G53460
			AT4G32915
			AT3G27740
			AT5G01410
			AT5G04140
43	Tetrapyrrole Biosynthesis	0.00330549	HEMA1
			GSA1
			HEMB1
			GUN5
			CHLD
44	superpathway of L-citrulline metabolism	0.00330549	AT3G27740	E-
			AT5G53460	carboxyphosphate
			AT4G32915	carbamate
			AT5G01410	Nω-hydroxy-L-arginine
			AT5G04140	L-glutamine
				urea
				2-oxoglutarate
				L-ornithine
				L-glutamate
				γ-L-glutamyl 5-phosphate
				L-glutamate-5-semialdehyde
				(S)-1-pyrroline-5-carboxylate
				an electron-transfer quinol
				an electron-transfer quinone
				L-proline
				AMP
				diphosphate
				L-aspartate
				fumarate
				L-arginino-succinate
				carbamoyl phosphate
				phosphate
				ADP
				ATP
				hydrogencarbonate
				ammonium
				H2O
				NADP+
				nitric oxide
				L-citrulline
				L-arginine
				NADPH
				H+
				oxygen
45	Sugar Degradation	0.00368139	AT1G69200
			AT4G38970
			AT2G21330
			AT3G52930
			AT2G21170
			CP12-2
			GapA-1
			AT3G12780
			PGK
			AT5G62630
46	Enzyme Cofactor Biosynthesis	0.00386204	AT2G36880
			AT3G17390
			HEMA1
			GSA1
			HEMB1
			AT4G23100
			AT5G08530
			AT2G02050
			AT3G03100
			AT1G47260
			THI1
			AT5G01410
			AT4G22220
47	S-adenosyl-L-methionine biosynthesis	0.00402301	AT2G36880	diphosphate
			AT3G17390	phosphate
				S-adenosyl-L-methionine
				ATP
				L-methionine
				H2O
48	Sucrose Degradation	0.00403566	AT1G69200
			AT4G38970
			AT2G21330
			AT3G52930
			AT2G21170
			CP12-2
			GapA-1
			AT3G12780
			PGK
49	pyruvate decarboxylation to acetyl CoA	0.00649781	AT1G34430	thiamine diphosphate
			AT1G54220	2-(α-hydroxyethyl)thiamine diphosphate
			AT3G52200	coenzyme A
				acetyl-CoA
				NADH
				a [pyruvate dehydrogenase E2 protein] N6-dihydrolipoyl-L-lysine
				NAD+
				CO2
				a [pyruvate dehydrogenase E2 protein] N6-S-acetyldihydrolipoyl-L-lysine
				pyruvate
				a [pyruvate dehydrogenase E2 protein] N6-lipoyl-L-lysine
				H+
50	Degradation/Utilization/Assimilation	0.00826406	AT1G34430
			AT1G54220
			AT3G52200
			NiR
			GLN1;2
			GLN1;4
			AT3G27740
			GapA-1
			CP12-2
			AT4G38970
			AT2G21330
			AT3G52930
			AT2G21170
			AT3G12780
			PGK
			rbcS1A
			AT1G69200
			AT5G53460
			AT3G16910
			AT1G54780
			AT3G48990
			AT3G48000
			AT2G36880
			AT3G17390
			AT5G04140
			AT3G61440
			SEX4
			APS1
			AT1G68560
			AT5G10560
			AT1G29660
			AT3G16370
			AT4G32915
			AT5G01410
			AT1G11860
			AT5G62630
			AT4G08390
51	Other Amino Acid Biosynthesis	0.0091012	AT2G43090
			AT5G53460
			AT4G32915
			AT3G27740
			AT5G01410
			AT5G04140
			APS1
52	superpathay of heme b biosynthesis from glutamate	0.00934604	HEMA1	preuroporphyrinogen
			GSA1	ammonium
			HEMB1	porphobilinogen
				5-aminolevulinate
				NADPH
				(S)-4-amino-5-oxopentanoate
				NADP+
				AMP
				diphosphate
				an L-glutamyl-[tRNAGlu]
				a tRNAglu
				L-glutamate
				ATP
				hydrogen peroxide
				Fe2+
				protoporphyrin IX
				protoheme
				uroporphyrinogen-III
				H2O
				CO2
				protoporphyrinogen IX
				coproporphyrinogen III
				oxygen
				H+
53	Heme b Biosynthesis	0.00934604	HEMA1
			GSA1
			HEMB1
54	L-methionine degradation I (to L-homocysteine)	0.00971447	AT2G36880	diphosphate
			AT3G17390	phosphate
				ATP
				L-methionine
				adenosine
				L-homocysteine
				H2O
				H+
				a methylated methyl donor
				S-adenosyl-L-homocysteine
				S-adenosyl-L-methionine
				a demethylated methyl donor
